# Supplementary material for: Cooperative assistance of a sulfonamide in a proline-mediated direct asymmetric aldol addition
Source: Royal Society of Chemistry journal article supplement (doi:10.1039/d3nj02685j), 2023-01-01

## Cooperative Assistance of a Sulfonamide in the Proline-mediated Direct Asymmetric Aldol Addition

Kiran Kumari, Meeta Bhati, Roopendra Singh Madhukar, Akram Gulam Hussain Khan, Prachi Janjani, S. Rajagopala Reddy and Srinivasan Easwar\*

Department of Chemistry, School of Chemical Sciences and Pharmacy, Central University of Rajasthan, NH-8, Bandarsindri, Distt. Ajmer, Rajasthan 305817, INDIA

Ph.: +91-1463-238755

Fax: +91-1463-238722

e-mail: [easwar.srinivasan@curaj.ac.in](mailto:easwar.srinivasan@curaj.ac.in)

### SUPPORTING INFORMATION

#### Contents

| S. No. | Detail                                                                                                                                                         | Page No.        |
|--------|----------------------------------------------------------------------------------------------------------------------------------------------------------------|-----------------|
| 1      | Computational studies on the transition states                                                                                                                 | SI-2 – SI-19    |
| 2      | Transition states for the desymmetrisation reaction                                                                                                            | SI-20           |
| 3      | Specific rotation of purified aldol adducts                                                                                                                    | SI-21           |
| 4      | References                                                                                                                                                     | SI-22           |
| 5      | HPLC data of the purified aldol adducts<br>(All the HPLC data were recorded on the purified aldol adducts, isolated after column chromatographic purification) | SI-23 – SI-45   |
| 6      | <sup>1</sup> H NMR spectra of the crude reaction mixtures<br>(For determination of the diastereomeric ratio)                                                   | SI-46 – SI-67   |
| 7      | <sup>1</sup> H and <sup>13</sup> C NMR spectra of the purified aldol adducts                                                                                   | SI-68 – SI-113  |
| 8      | <sup>1</sup> H & <sup>13</sup> C NMR spectra and HRMS analysis reports of the catalysts and catalyst precursors                                                | SI-114 – SI-125 |

#### General

- Chiral HPLC studies were carried out on a Shimadzu LC-2010CHT HPLC system.
- <sup>1</sup>H and <sup>13</sup>C NMR spectra were recorded on a Bruker Avance 500 MHz NMR Spectrometer.
- Mass spectra were obtained using a HRMS-ESI-Q-Time of Flight LC-MS (Synapt G2, Waters).
- Diastereomeric ratios were calculated from the <sup>1</sup>H NMR of the crude reaction mixtures.
- All the aldol products were isolated as a mixture of *syn* and *anti*-diastereomers, all the <sup>1</sup>H and <sup>13</sup>C NMR spectra provided here are of the respective isolated diastereomeric mixture.
- The enantiomeric excess was determined by HPLC analysis of the purified products on a chiral stationary phase (details provided below).

### Computational studies on the proposed transition states

For the computational study, all the stationary and saddle point optimizations were carried out at the density functional theory level, employing the B3LYP hybrid functional<sup>1</sup> and 6-31G (d, p)<sup>2</sup> basis set in the gaseous phase. All the computations were performed using Gaussian 09 program package.<sup>3</sup> Computational studies were conducted in order to rationalize the role of the proline-based sulphonamide catalyst in the asymmetric aldol reaction mechanistically and to corroborate the experimental results. First, we carried out the energy calculations for both the catalysts **1a** and **1b**, where the “*cis*” sulphonamide-tagged proline **1a** was more stabilized than the “*trans*” sulphonamide-tagged proline **1b** by an energy difference of 2.31 kcal/mol, conducive to the presence of intramolecular hydrogen bonding interaction between the sulphonamide and carboxylic acid in **1a** (**Figure S1**). The optimized geometries of the species participating in the aldol reaction are shown in **Figures S2-S4**; the lowest vibrational frequencies ( $\nu_1$ ) are also provided.

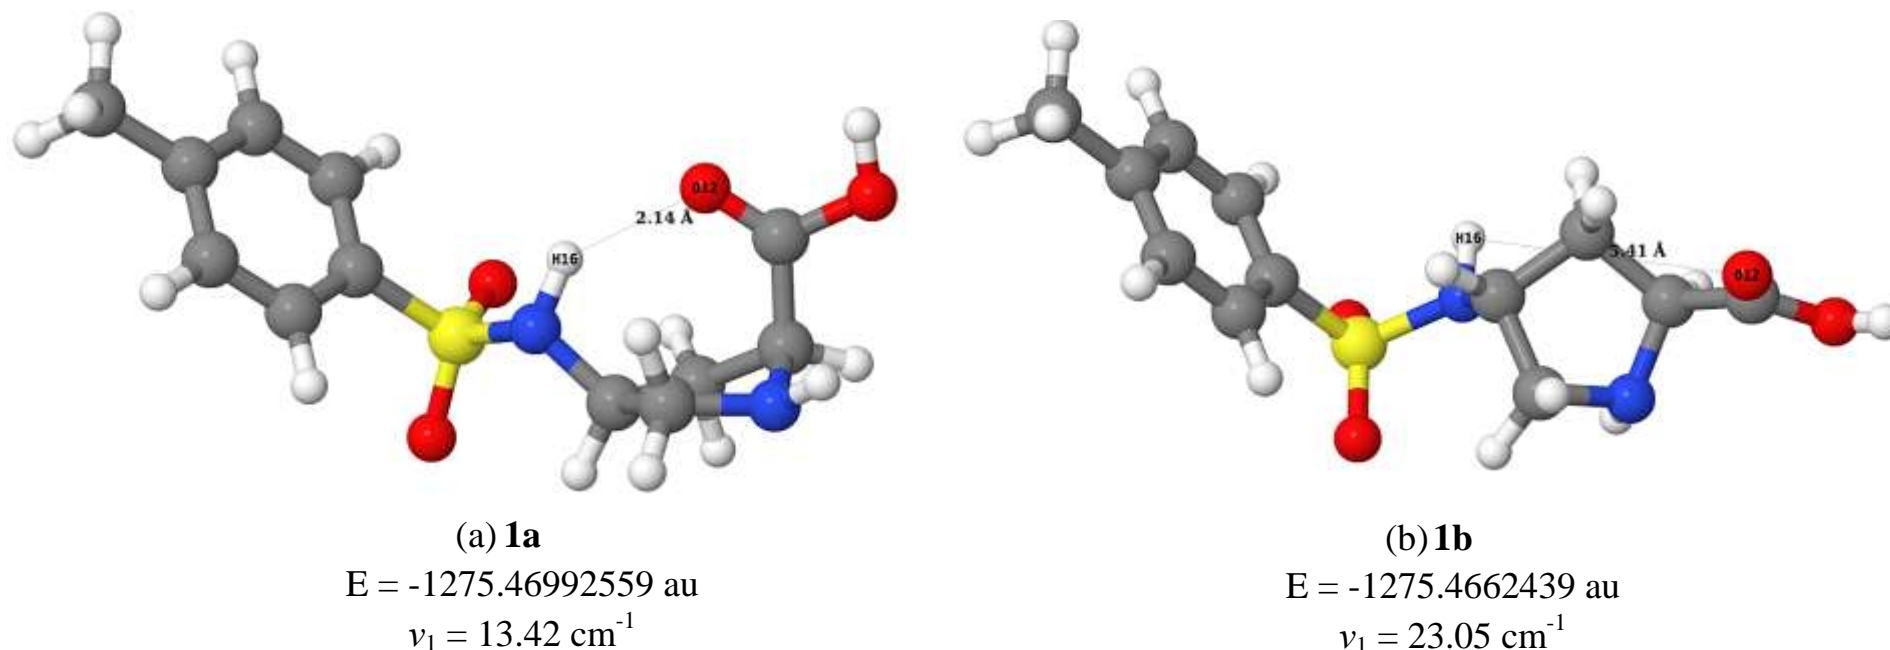

**Figure S1:** The ball-stick representation of the “*cis*” (**1a**) and “*trans*” (**1b**) catalysts along with the energies and the lowest vibrational frequencies ( $\nu_1$ ). The dashed line shows the distance between O12 and H16.

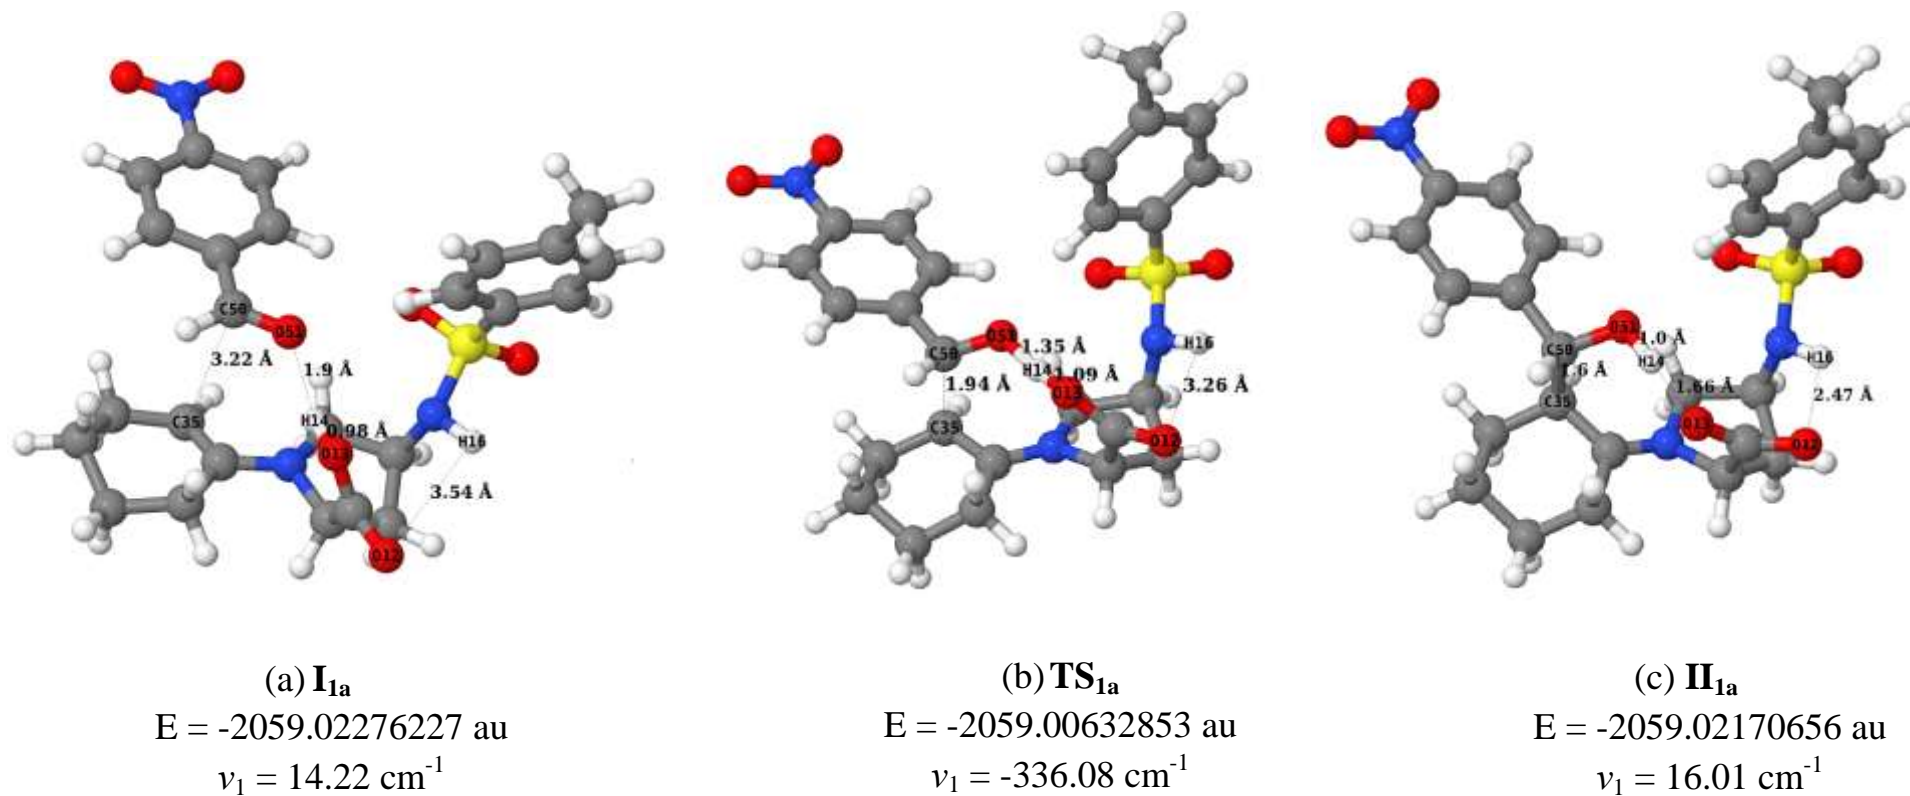

**Figure S2:** The ball and stick representation of the main constituents of **1a** catalysed aldol reaction along with their energies and lowest negative frequencies

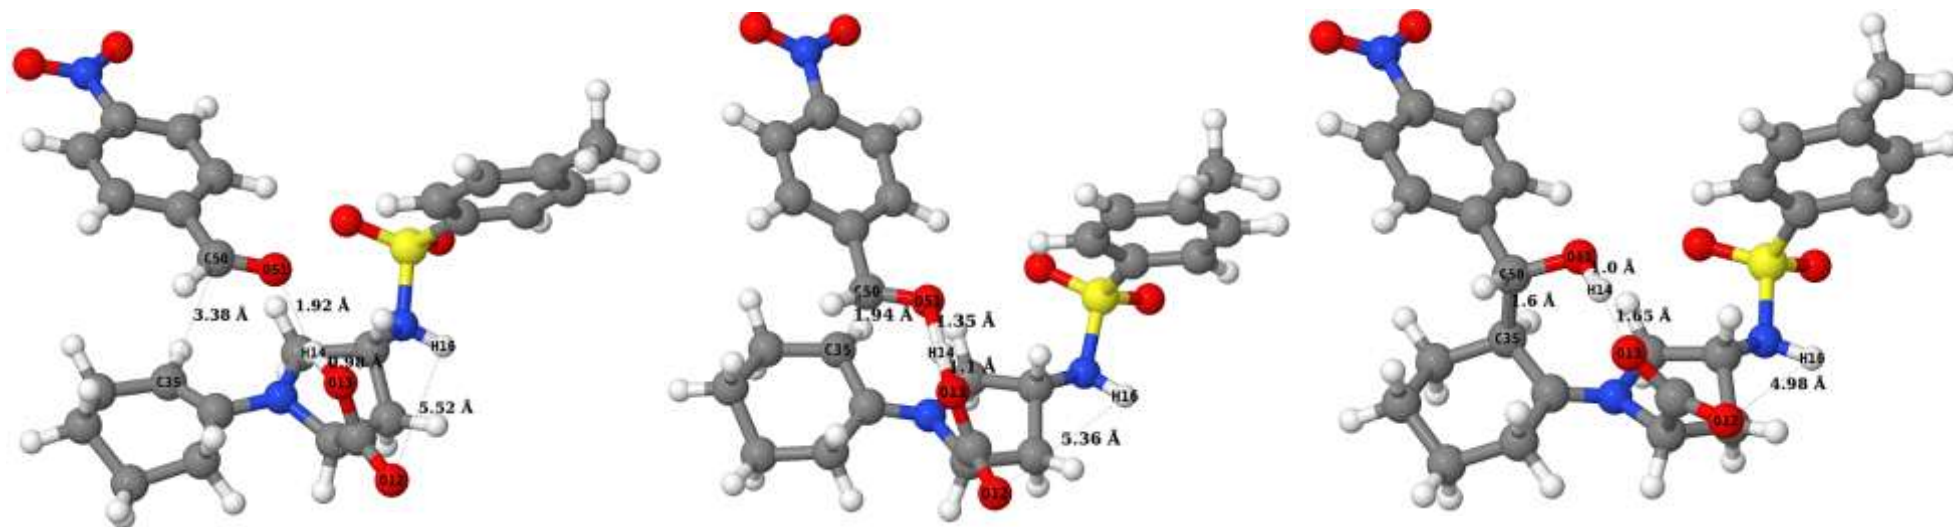

(a) **I<sub>1b</sub>**  
 $E = -2059.02199704$  au  
 $\nu_1 = 13.21$  cm<sup>-1</sup>

(b) **TS<sub>1b</sub>**  
 $E = -2059.00473652$  au  
 $\nu_1 = -353.57$  cm<sup>-1</sup>

(c) **II<sub>1b</sub>**  
 $E = -2059.01844174$  au  
 $\nu_1 = 8.61$  cm<sup>-1</sup>

**Figure S3:** The ball and stick representation of the main constituents of **1b** catalysed aldol reaction along with their energies and lowest negative frequencies

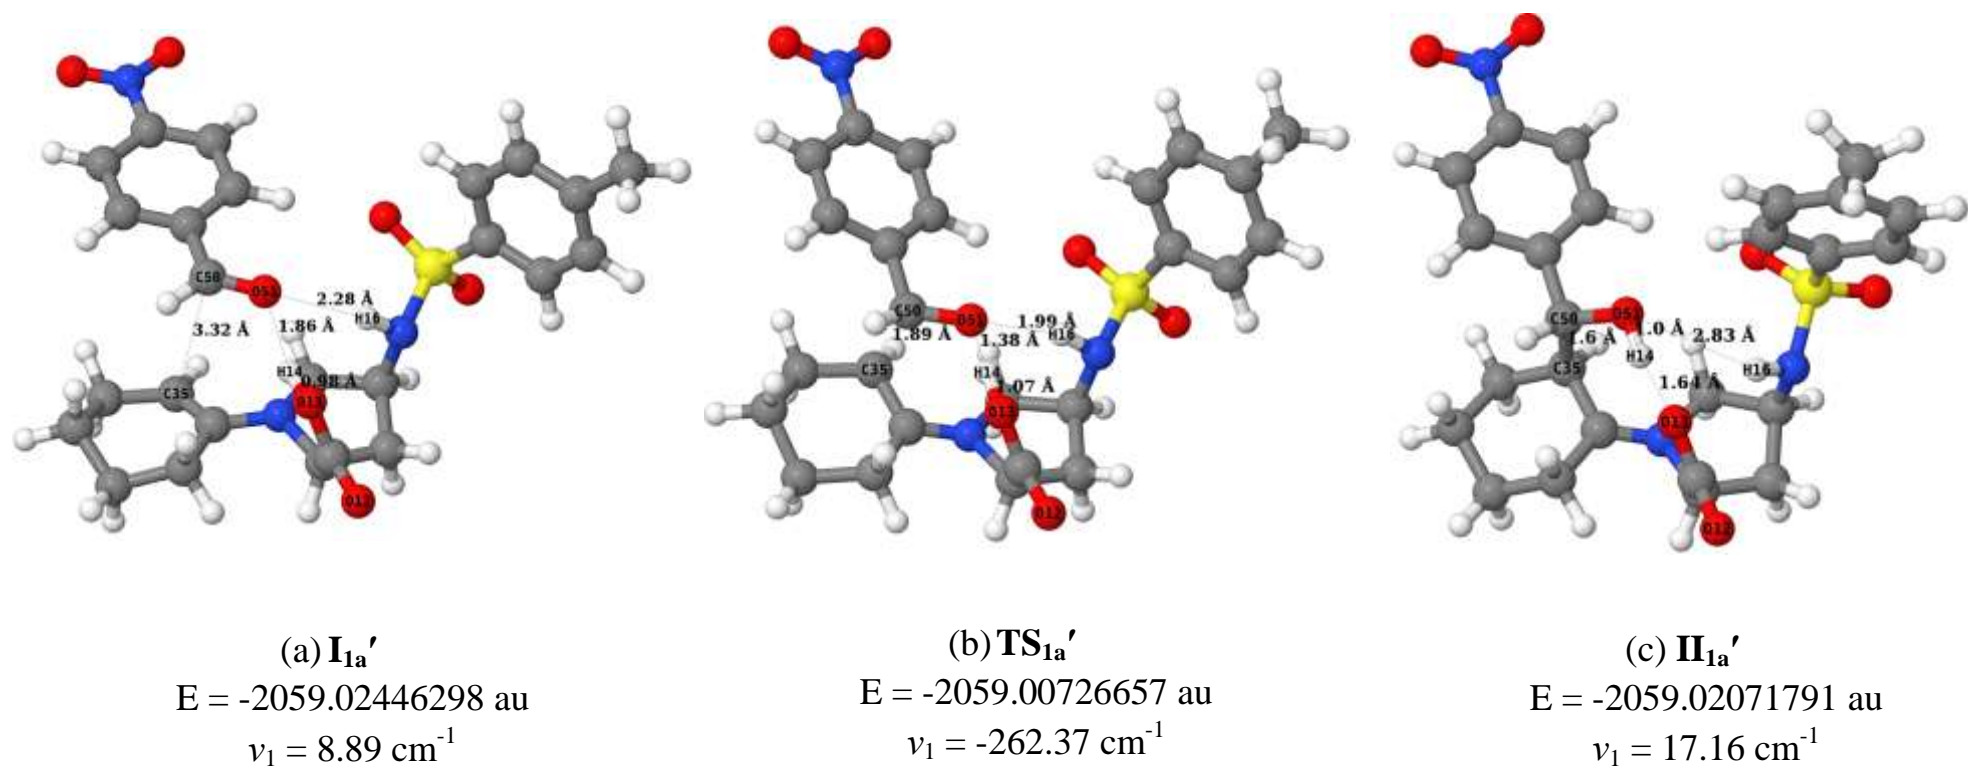

**Figure S4:** The ball and stick representation of the main constituents involving a second transition state  $TS_{1a}'$  for the reaction with the catalyst **1a** catalyzed aldol reaction along with their energies and lowest negative frequencies

**Optimized cartesian coordinates (in angstrom units):**

**1a**

Energy = -1275.46992559 au

|   |          |          |          |
|---|----------|----------|----------|
| C | 3.91170  | 0.00983  | -0.01174 |
| C | 2.49028  | -0.43427 | 1.83709  |
| C | 1.80474  | -1.08225 | 0.60280  |
| C | 2.86678  | -0.98660 | -0.53412 |
| H | 4.91447  | -0.15917 | -0.41392 |
| H | 2.42848  | -1.07010 | 2.72591  |
| H | 1.98281  | 0.51369  | 2.06823  |
| H | 1.54669  | -2.12377 | 0.79541  |
| H | 3.35473  | -1.95506 | -0.66900 |
| H | 2.41893  | -0.69465 | -1.48554 |
| C | 3.51456  | 1.45948  | -0.28336 |
| O | 4.59003  | 2.26772  | -0.40809 |
| O | 2.37705  | 1.89691  | -0.30441 |
| H | 4.24657  | 3.17239  | -0.51263 |
| N | 0.53512  | -0.37904 | 0.33929  |
| H | 0.72548  | 0.56707  | -0.00305 |
| N | 3.89265  | -0.27525 | 1.43095  |
| S | -0.54352 | -1.15345 | -0.71361 |
| C | -2.08086 | -0.34905 | -0.26892 |
| C | -2.65487 | 0.56617  | -1.14823 |
| C | -2.70020 | -0.67268 | 0.94124  |
| C | -3.86167 | 1.17438  | -0.80049 |
| H | -2.16209 | 0.78761  | -2.08831 |
| C | -3.90283 | -0.05788 | 1.27038  |
| H | -2.24360 | -1.39768 | 1.60604  |
| C | -4.50277 | 0.87375  | 0.40695  |
| H | -4.31273 | 1.89077  | -1.48169 |
| H | -4.38860 | -0.30472 | 2.21076  |
| O | -0.26060 | -0.81778 | -2.11930 |
| O | -0.58988 | -2.55885 | -0.29024 |
| C | -5.82228 | 1.51207  | 0.76748  |
| H | -6.01709 | 2.40013  | 0.16061  |
| H | -6.65248 | 0.81358  | 0.60682  |
| H | -5.84869 | 1.80673  | 1.82133  |
| H | 4.40073  | 0.40670  | 1.98675  |

**1b**

Energy = -1275.46624391 au

|   |         |          |          |
|---|---------|----------|----------|
| C | 1.91020 | -0.09975 | 1.26680  |
| C | 3.42737 | 0.10929  | -0.52545 |
| C | 2.11164 | 0.84636  | -0.90708 |
| C | 1.04915 | 0.25717  | 0.03816  |
| H | 1.43390 | -0.81657 | 1.93535  |
| H | 2.11877 | 0.82085  | 1.82542  |
| H | 3.77090 | -0.57708 | -1.30303 |
| H | 2.22073 | 1.91399  | -0.70131 |
| H | 1.85768 | 0.73248  | -1.96581 |

|   |          |          |          |
|---|----------|----------|----------|
| H | 0.26240  | 0.98778  | 0.26833  |
| C | 4.55761  | 1.09214  | -0.22702 |
| O | 4.41714  | 2.22006  | 0.19553  |
| O | 5.76948  | 0.53885  | -0.44757 |
| H | 6.42631  | 1.19759  | -0.16410 |
| N | 3.16331  | -0.64146 | 0.72686  |
| H | 3.01275  | -1.61709 | 0.48747  |
| N | 0.48845  | -0.96332 | -0.58380 |
| H | 0.37736  | -0.90155 | -1.59234 |
| S | -0.88010 | -1.71860 | 0.05340  |
| O | -1.20787 | -2.76381 | -0.91840 |
| O | -0.59173 | -2.01474 | 1.45865  |
| C | -2.21142 | -0.51267 | 0.02849  |
| C | -2.98187 | -0.36579 | -1.12795 |
| C | -2.45401 | 0.27808  | 1.15336  |
| C | -3.99371 | 0.58989  | -1.15373 |
| H | -2.80119 | -1.00870 | -1.98286 |
| C | -3.47036 | 1.23131  | 1.10851  |
| H | -1.86816 | 0.12857  | 2.05345  |
| C | -4.25373 | 1.40355  | -0.04044 |
| H | -4.59765 | 0.70223  | -2.05015 |
| H | -3.66158 | 1.84666  | 1.98346  |
| C | -5.37481 | 2.41351  | -0.06897 |
| H | -6.32369 | 1.95180  | 0.23043  |
| H | -5.18490 | 3.24282  | 0.61798  |
| H | -5.51686 | 2.82587  | -1.07205 |

**I<sub>1a</sub>** (Enamine with *cis*-catalyst **1a**)

Energy = -2059.02276227 au

|   |          |          |          |
|---|----------|----------|----------|
| C | -1.16117 | 3.44347  | -0.54806 |
| C | -0.06362 | 1.64832  | -1.74551 |
| C | -1.55297 | 1.62914  | -2.11057 |
| C | -1.97266 | 3.07402  | -1.80760 |
| H | -0.93572 | 4.51356  | -0.56455 |
| H | 0.52174  | 1.98321  | -2.61624 |
| H | 0.29723  | 0.66426  | -1.44823 |
| H | -1.70127 | 1.37604  | -3.16660 |
| H | -1.66446 | 3.70895  | -2.64348 |
| H | -3.04571 | 3.21510  | -1.65785 |
| C | -1.99775 | 3.23187  | 0.73573  |
| O | -3.00339 | 3.88431  | 0.91291  |
| O | -1.56275 | 2.33966  | 1.62794  |
| H | -0.81995 | 1.80154  | 1.27573  |
| N | -2.31824 | 0.71554  | -1.22357 |
| H | -3.28843 | 1.01967  | -1.14049 |
| N | 0.04501  | 2.61559  | -0.64391 |
| S | -2.36060 | -0.92201 | -1.70301 |
| C | -3.21693 | -1.63291 | -0.30639 |
| C | -2.66811 | -1.52128 | 0.97535  |
| C | -4.40240 | -2.33054 | -0.53262 |

|   |          |          |          |
|---|----------|----------|----------|
| C | -3.33739 | -2.11395 | 2.04037  |
| H | -1.74410 | -0.97530 | 1.13139  |
| C | -5.05279 | -2.92151 | 0.55021  |
| H | -4.79954 | -2.40409 | -1.53879 |
| C | -4.53615 | -2.82049 | 1.84770  |
| H | -2.92367 | -2.02691 | 3.04136  |
| H | -5.97620 | -3.46865 | 0.38263  |
| O | -3.19430 | -1.10257 | -2.90074 |
| O | -0.96183 | -1.37644 | -1.74434 |
| C | -5.25532 | -3.43851 | 3.02158  |
| H | -4.56314 | -3.98777 | 3.66781  |
| H | -5.72958 | -2.66687 | 3.63957  |
| H | -6.03703 | -4.12918 | 2.69540  |
| C | 2.44809  | 2.42357  | -0.62488 |
| C | 1.30851  | 3.02310  | -0.19969 |
| C | 1.33864  | 4.10677  | 0.86503  |
| C | 2.74457  | 4.67834  | 1.09812  |
| C | 3.79116  | 3.56642  | 1.19179  |
| C | 3.82724  | 2.76674  | -0.11568 |
| H | 0.93100  | 3.69828  | 1.80080  |
| H | 2.40044  | 1.66447  | -1.39853 |
| H | 3.00614  | 5.34531  | 0.26641  |
| H | 2.73944  | 5.29285  | 2.00496  |
| H | 4.78041  | 3.98199  | 1.41370  |
| H | 3.53437  | 2.90126  | 2.02835  |
| H | 4.37686  | 3.34097  | -0.87844 |
| H | 4.40834  | 1.84431  | 0.02202  |
| H | 0.66857  | 4.92909  | 0.59282  |
| C | 1.50524  | 0.17835  | 1.48016  |
| O | 0.30023  | 0.26476  | 1.28444  |
| H | 2.02490  | 0.91087  | 2.12535  |
| C | 2.35923  | -0.90067 | 0.93893  |
| C | 1.83547  | -1.85351 | 0.04815  |
| C | 3.70206  | -0.97045 | 1.34109  |
| C | 2.65368  | -2.86677 | -0.43701 |
| H | 0.80100  | -1.78096 | -0.27218 |
| C | 4.52753  | -1.98383 | 0.86575  |
| H | 4.09725  | -0.23025 | 2.03136  |
| C | 3.98381  | -2.91499 | -0.01680 |
| H | 2.28538  | -3.61207 | -1.13041 |
| H | 5.56612  | -2.06762 | 1.15845  |
| N | 4.85358  | -3.99333 | -0.52769 |
| O | 6.02262  | -4.01032 | -0.14452 |
| O | 4.35555  | -4.80675 | -1.30304 |

**TS<sub>1a</sub>** (TS with the *cis*-catalyst **1a**)

Energy = -2059.00632853 au

|   |         |          |          |
|---|---------|----------|----------|
| C | 1.57705 | -3.36259 | -0.17221 |
| C | 0.55218 | -1.82045 | -1.75950 |
| C | 2.08098 | -1.75141 | -1.89986 |



|   |          |          |          |
|---|----------|----------|----------|
| C | 2.53723  | -3.10634 | -1.33936 |
| H | 1.45718  | -4.43405 | 0.00074  |
| H | 0.09983  | -2.23866 | -2.66655 |
| H | 0.13281  | -0.84355 | -1.55354 |
| H | 2.36780  | -1.63002 | -2.95068 |
| H | 2.41200  | -3.87159 | -2.11196 |
| H | 3.57403  | -3.13033 | -0.99970 |
| C | 2.12165  | -2.79178 | 1.18134  |
| O | 3.23004  | -3.17768 | 1.50726  |
| O | 1.34590  | -2.02982 | 1.90419  |
| H | 0.60658  | -1.40559 | 1.40157  |
| N | 2.63302  | -0.67384 | -1.04854 |
| H | 3.59291  | -0.86991 | -0.76740 |
| N | 0.30938  | -2.76552 | -0.63175 |
| S | 2.59576  | 0.89905  | -1.71429 |
| C | 2.94285  | 1.88192  | -0.26643 |
| C | 2.09012  | 1.81833  | 0.84067  |
| C | 4.04196  | 2.74018  | -0.29511 |
| C | 2.36843  | 2.62882  | 1.93659  |
| H | 1.23697  | 1.14602  | 0.84939  |
| C | 4.29558  | 3.54541  | 0.81398  |
| H | 4.67871  | 2.77097  | -1.17200 |
| C | 3.46940  | 3.50029  | 1.94408  |
| H | 1.71693  | 2.58358  | 2.80498  |
| H | 5.14837  | 4.21838  | 0.79936  |
| O | 3.69357  | 1.08237  | -2.67460 |
| O | 1.21212  | 1.10073  | -2.17270 |
| C | 3.76529  | 4.34995  | 3.15552  |
| H | 2.84760  | 4.75739  | 3.59049  |
| H | 4.25779  | 3.75742  | 3.93610  |
| H | 4.42648  | 5.18476  | 2.90880  |
| C | -1.99000 | -2.14772 | -0.38030 |
| C | -0.89112 | -3.02823 | -0.12774 |
| C | -1.03605 | -4.11639 | 0.91286  |
| C | -2.45354 | -4.70952 | 0.97066  |
| C | -3.52097 | -3.61622 | 1.04596  |
| C | -3.40489 | -2.67432 | -0.15798 |
| H | -0.76036 | -3.68193 | 1.88433  |
| H | -1.90182 | -1.56236 | -1.29197 |
| H | -2.62479 | -5.32339 | 0.07679  |
| H | -2.51841 | -5.38382 | 1.83084  |
| H | -4.52113 | -4.06180 | 1.07459  |
| H | -3.40307 | -3.05561 | 1.98222  |
| H | -3.73032 | -3.20875 | -1.06185 |
| H | -4.09073 | -1.82815 | -0.05252 |
| H | -0.31201 | -4.91476 | 0.73097  |
| C | -1.53342 | -0.76673 | 0.90475  |
| O | -0.25646 | -0.51834 | 0.85304  |
| H | -1.91319 | -1.28196 | 1.80384  |

|   |          |          |          |
|---|----------|----------|----------|
| C | -2.44261 | 0.36311  | 0.49245  |
| C | -2.00944 | 1.31146  | -0.44876 |
| C | -3.70883 | 0.50790  | 1.07838  |
| C | -2.83498 | 2.36803  | -0.81554 |
| H | -1.01647 | 1.22789  | -0.87865 |
| C | -4.54595 | 1.56221  | 0.72312  |
| H | -4.03531 | -0.19833 | 1.83654  |
| C | -4.09577 | 2.47551  | -0.22667 |
| H | -2.52067 | 3.10892  | -1.53984 |
| H | -5.52419 | 1.69282  | 1.16800  |
| N | -4.97312 | 3.59127  | -0.61067 |
| O | -6.07988 | 3.66043  | -0.07415 |
| O | -4.55172 | 4.38978  | -1.44714 |

**II<sub>1a</sub>** (Intermediate with *cis*-catalyst **1a**)

Energy = -2059.02170656 au

|   |          |          |          |
|---|----------|----------|----------|
| C | -1.80590 | 3.32748  | -0.04614 |
| C | -0.77418 | 1.86514  | -1.68732 |
| C | -2.30440 | 1.75100  | -1.77783 |
| C | -2.78503 | 3.08454  | -1.18691 |
| H | -1.72853 | 4.37796  | 0.23762  |
| H | -0.35113 | 2.30799  | -2.59487 |
| H | -0.32683 | 0.89667  | -1.49302 |
| H | -2.61930 | 1.63084  | -2.81969 |
| H | -2.71959 | 3.86506  | -1.95274 |
| H | -3.80349 | 3.05160  | -0.79902 |
| C | -2.20658 | 2.50822  | 1.29830  |
| O | -3.42408 | 2.44362  | 1.48196  |
| O | -1.22916 | 2.09376  | 1.97695  |
| H | -0.20420 | 0.94771  | 1.34434  |
| N | -2.76201 | 0.62780  | -0.93743 |
| H | -3.59224 | 0.82606  | -0.38096 |
| N | -0.52293 | 2.81408  | -0.55244 |
| S | -2.82121 | -0.88363 | -1.69286 |
| C | -3.02152 | -1.96110 | -0.28393 |
| C | -2.03398 | -2.01012 | 0.70546  |
| C | -4.14886 | -2.77984 | -0.22777 |
| C | -2.20109 | -2.89059 | 1.76893  |
| H | -1.15917 | -1.37058 | 0.65238  |
| C | -4.29228 | -3.65711 | 0.84612  |
| H | -4.89213 | -2.72521 | -1.01501 |
| C | -3.32773 | -3.72390 | 1.85905  |
| H | -1.44226 | -2.93111 | 2.54552  |
| H | -5.16758 | -4.29875 | 0.89627  |
| O | -4.00686 | -1.02209 | -2.55100 |
| O | -1.48958 | -1.04712 | -2.30230 |
| C | -3.49970 | -4.65289 | 3.03569  |
| H | -2.55932 | -5.15140 | 3.29070  |
| H | -3.82344 | -4.09939 | 3.92539  |
| H | -4.24986 | -5.42187 | 2.83382  |

|   |         |          |          |
|---|---------|----------|----------|
| C | 1.78059 | 2.05731  | -0.26312 |
| C | 0.62731 | 2.97738  | 0.03927  |
| C | 0.83331 | 4.02152  | 1.10636  |
| C | 2.18062 | 4.75474  | 0.95393  |
| C | 3.34690 | 3.76828  | 0.86532  |
| C | 3.13574 | 2.79939  | -0.30335 |
| H | 0.78631 | 3.50627  | 2.07271  |
| H | 1.63082 | 1.57276  | -1.22906 |
| H | 2.16063 | 5.38105  | 0.05219  |
| H | 2.30316 | 5.43365  | 1.80397  |
| H | 4.29156 | 4.30581  | 0.72979  |
| H | 3.43528 | 3.21907  | 1.81154  |
| H | 3.18428 | 3.36662  | -1.24185 |
| H | 3.94093 | 2.06089  | -0.35231 |
| H | 0.00875 | 4.73484  | 1.11807  |
| C | 1.70843 | 0.87510  | 0.81656  |
| O | 0.42010 | 0.32845  | 0.87167  |
| H | 2.00790 | 1.29256  | 1.78896  |
| C | 2.68276 | -0.22636 | 0.43961  |
| C | 2.31297 | -1.19592 | -0.50552 |
| C | 3.95475 | -0.29022 | 1.02320  |
| C | 3.20219 | -2.20092 | -0.87225 |
| H | 1.31752 | -1.17597 | -0.93656 |
| C | 4.85755 | -1.28850 | 0.66548  |
| H | 4.24003 | 0.43848  | 1.77670  |
| C | 4.46580 | -2.22847 | -0.28349 |
| H | 2.93468 | -2.95951 | -1.59692 |
| H | 5.84300 | -1.35547 | 1.10846  |
| N | 5.41299 | -3.28690 | -0.66912 |
| O | 6.52212 | -3.28364 | -0.13436 |
| O | 5.04136 | -4.11026 | -1.50439 |

**I<sub>1b</sub>** (Enamine with *trans*-catalyst **1b**)

Energy = -2059.02199704 au

|   |          |         |          |
|---|----------|---------|----------|
| C | -0.96085 | 3.38914 | -0.56430 |
| C | -0.15640 | 1.27988 | -1.42827 |
| C | -1.66774 | 1.17889 | -1.20684 |
| C | -2.09279 | 2.64716 | -1.32166 |
| H | -0.78071 | 4.36422 | -1.02730 |
| H | 0.05599  | 1.38659 | -2.50362 |
| H | 0.37962  | 0.40823 | -1.05835 |
| H | -1.85569 | 0.84204 | -0.17922 |
| H | -2.09000 | 2.94614 | -2.37582 |
| H | -3.07753 | 2.86508 | -0.90153 |
| C | -1.40140 | 3.69068 | 0.88523  |
| O | -2.11939 | 4.63344 | 1.12821  |
| O | -0.99379 | 2.84269 | 1.83979  |
| H | -0.42835 | 2.12478 | 1.47827  |
| N | -2.33837 | 0.30905 | -2.17676 |
| H | -3.24109 | 0.63820 | -2.50753 |

|   |          |          |          |
|---|----------|----------|----------|
| N | 0.18847  | 2.47925  | -0.66550 |
| S | -2.40559 | -1.34870 | -1.86624 |
| C | -3.44311 | -1.58080 | -0.42025 |
| C | -2.89764 | -1.46313 | 0.86221  |
| C | -4.80153 | -1.85232 | -0.59829 |
| C | -3.73248 | -1.60691 | 1.96819  |
| H | -1.83899 | -1.26862 | 0.99502  |
| C | -5.61738 | -1.99941 | 0.52096  |
| H | -5.20171 | -1.96452 | -1.60007 |
| C | -5.10017 | -1.87745 | 1.81849  |
| H | -3.31202 | -1.50957 | 2.96529  |
| H | -6.67327 | -2.21641 | 0.38444  |
| O | -3.10134 | -1.92762 | -3.01470 |
| O | -1.04131 | -1.74094 | -1.49342 |
| C | -5.98531 | -2.06300 | 3.02646  |
| H | -5.68089 | -1.40876 | 3.84847  |
| H | -7.03238 | -1.85321 | 2.79209  |
| H | -5.93187 | -3.09484 | 3.39474  |
| C | 2.55102  | 2.16370  | -1.02613 |
| C | 1.51998  | 2.89413  | -0.53904 |
| C | 1.75438  | 4.16247  | 0.26284  |
| C | 3.19183  | 4.68633  | 0.13706  |
| C | 4.20741  | 3.55199  | 0.29174  |
| C | 4.00481  | 2.50818  | -0.81325 |
| H | 1.51316  | 3.97019  | 1.31789  |
| H | 2.34965  | 1.28549  | -1.63116 |
| H | 3.32349  | 5.15395  | -0.84733 |
| H | 3.35872  | 5.47014  | 0.88377  |
| H | 5.23156  | 3.94050  | 0.26720  |
| H | 4.07199  | 3.08068  | 1.27557  |
| H | 4.44214  | 2.88035  | -1.75328 |
| H | 4.56865  | 1.59496  | -0.57672 |
| H | 1.05959  | 4.94750  | -0.05579 |
| C | 1.64105  | 0.26123  | 1.61999  |
| O | 0.43102  | 0.40294  | 1.49519  |
| H | 2.24572  | 1.03170  | 2.13459  |
| C | 2.39673  | -0.91937 | 1.15176  |
| C | 1.76964  | -1.93537 | 0.40953  |
| C | 3.75955  | -1.01874 | 1.47313  |
| C | 2.50200  | -3.04069 | -0.00629 |
| H | 0.72227  | -1.84671 | 0.14171  |
| C | 4.50018  | -2.12374 | 1.06776  |
| H | 4.23734  | -0.22856 | 2.04570  |
| C | 3.85313  | -3.11636 | 0.33476  |
| H | 2.05073  | -3.83507 | -0.58691 |
| H | 5.55116  | -2.23189 | 1.30255  |
| N | 4.63253  | -4.29358 | -0.09952 |
| O | 5.82415  | -4.32880 | 0.20396  |
| O | 4.04116  | -5.16364 | -0.73465 |

**TS<sub>1b</sub>** (TS with *trans*-catalyst **1b**)

Energy = -2059.00473652 au

|   |          |          |          |
|---|----------|----------|----------|
| C | -1.17844 | 3.44709  | -0.18485 |
| C | -0.57768 | 1.50332  | -1.52742 |
| C | -2.02147 | 1.37691  | -1.03299 |
| C | -2.42533 | 2.84468  | -0.86338 |
| H | -1.05939 | 4.50037  | -0.44402 |
| H | -0.57086 | 1.77434  | -2.59038 |
| H | -0.00904 | 0.59847  | -1.37218 |
| H | -2.00839 | 0.90446  | -0.04262 |
| H | -2.59227 | 3.29931  | -1.84643 |
| H | -3.31322 | 3.00117  | -0.24791 |
| C | -1.32501 | 3.40279  | 1.37216  |
| O | -2.06628 | 4.23810  | 1.85641  |
| O | -0.67722 | 2.49243  | 2.05142  |
| H | -0.16240 | 1.66998  | 1.53993  |
| N | -2.86952 | 0.64501  | -1.97371 |
| H | -3.84994 | 0.91488  | -1.95221 |
| N | -0.05714 | 2.63558  | -0.72259 |
| S | -2.75039 | -1.05049 | -1.99339 |
| C | -3.30611 | -1.64272 | -0.39436 |
| C | -2.43772 | -1.63180 | 0.70351  |
| C | -4.62200 | -2.09263 | -0.26529 |
| C | -2.91127 | -2.06517 | 1.93964  |
| H | -1.41209 | -1.29173 | 0.60518  |
| C | -5.07066 | -2.53028 | 0.97874  |
| H | -5.27148 | -2.11359 | -1.13349 |
| C | -4.22767 | -2.52198 | 2.09874  |
| H | -2.24169 | -2.04920 | 2.79500  |
| H | -6.09182 | -2.88727 | 1.08016  |
| O | -3.71740 | -1.48375 | -3.00073 |
| O | -1.31634 | -1.33929 | -2.10477 |
| C | -4.71184 | -3.01828 | 3.43890  |
| H | -4.31097 | -2.41208 | 4.25661  |
| H | -5.80300 | -3.00103 | 3.50301  |
| H | -4.38776 | -4.05167 | 3.61207  |
| C | 2.19551  | 1.81855  | -0.65148 |
| C | 1.22463  | 2.85117  | -0.45009 |
| C | 1.60653  | 4.09917  | 0.31382  |
| C | 3.06416  | 4.52531  | 0.07989  |
| C | 4.02335  | 3.35091  | 0.28108  |
| C | 3.67165  | 2.20750  | -0.67763 |
| H | 1.44333  | 3.89307  | 1.38130  |
| H | 1.94771  | 1.11082  | -1.43747 |
| H | 3.17144  | 4.91507  | -0.94068 |
| H | 3.30285  | 5.35072  | 0.75827  |
| H | 5.05817  | 3.66887  | 0.11519  |
| H | 3.96537  | 3.00774  | 1.32233  |
| H | 3.93636  | 2.50716  | -1.70149 |

|   |         |          |          |
|---|---------|----------|----------|
| H | 4.28061 | 1.32356  | -0.46331 |
| H | 0.93029 | 4.92010  | 0.06134  |
| C | 1.75985 | 0.72183  | 0.88262  |
| O | 0.46509 | 0.60453  | 1.00838  |
| H | 2.28074 | 1.32414  | 1.64617  |
| C | 2.51380 | -0.54898 | 0.58084  |
| C | 1.93011 | -1.56233 | -0.19702 |
| C | 3.79549 | -0.75003 | 1.11348  |
| C | 2.61840 | -2.74241 | -0.45320 |
| H | 0.93039 | -1.43108 | -0.59760 |
| C | 4.49672 | -1.92803 | 0.86957  |
| H | 4.24187 | 0.01414  | 1.74338  |
| C | 3.89592 | -2.90751 | 0.08360  |
| H | 2.18576 | -3.53282 | -1.05347 |
| H | 5.48417 | -2.10260 | 1.27754  |
| N | 4.62852 | -4.15485 | -0.18132 |
| O | 5.75556 | -4.27028 | 0.30195  |
| O | 4.07322 | -5.00926 | -0.87141 |

**II<sub>1b</sub>** (Intermediate with *trans*-catalyst **1b**)

Energy = -2059.01844174 au

|   |          |          |          |
|---|----------|----------|----------|
| C | -1.51386 | 3.33437  | -0.01255 |
| C | -0.85490 | 1.40220  | -1.32577 |
| C | -2.32824 | 1.30034  | -0.90802 |
| C | -2.73052 | 2.76974  | -0.74559 |
| H | -1.40621 | 4.41248  | -0.13318 |
| H | -0.78491 | 1.58703  | -2.40236 |
| H | -0.28489 | 0.52422  | -1.05574 |
| H | -2.38388 | 0.81886  | 0.07808  |
| H | -2.87517 | 3.23105  | -1.72980 |
| H | -3.62028 | 2.92132  | -0.13270 |
| C | -1.60534 | 3.04080  | 1.58001  |
| O | -2.64852 | 3.47109  | 2.06787  |
| O | -0.61507 | 2.45072  | 2.09673  |
| H | 0.17820  | 1.11472  | 1.53785  |
| N | -3.12552 | 0.58566  | -1.90587 |
| H | -4.11764 | 0.80874  | -1.87145 |
| N | -0.36513 | 2.60812  | -0.59571 |
| S | -2.93352 | -1.09971 | -2.02684 |
| C | -3.42504 | -1.80563 | -0.45399 |
| C | -2.51225 | -1.86655 | 0.60522  |
| C | -4.73584 | -2.26103 | -0.29887 |
| C | -2.93388 | -2.37639 | 1.83036  |
| H | -1.48895 | -1.52993 | 0.47794  |
| C | -5.13403 | -2.77518 | 0.93323  |
| H | -5.42135 | -2.22715 | -1.13860 |
| C | -4.24570 | -2.83757 | 2.01556  |
| H | -2.22905 | -2.41703 | 2.65604  |
| H | -6.15151 | -3.13593 | 1.05515  |
| O | -3.90328 | -1.51575 | -3.03903 |

|   |          |          |          |
|---|----------|----------|----------|
| O | -1.49097 | -1.31838 | -2.18187 |
| C | -4.67664 | -3.40707 | 3.34467  |
| H | -4.32532 | -2.78634 | 4.17467  |
| H | -5.76455 | -3.48542 | 3.41389  |
| H | -4.26138 | -4.41108 | 3.49304  |
| C | 1.93504  | 1.78669  | -0.52896 |
| C | 0.87964  | 2.83123  | -0.27821 |
| C | 1.28264  | 4.08651  | 0.45164  |
| C | 2.63513  | 4.65069  | -0.02070 |
| C | 3.72204  | 3.57488  | -0.01376 |
| C | 3.30456  | 2.39872  | -0.90224 |
| H | 1.32931  | 3.81974  | 1.51525  |
| H | 1.62729  | 1.13306  | -1.34693 |
| H | 2.53150  | 5.05971  | -1.03436 |
| H | 2.90565  | 5.48914  | 0.62902  |
| H | 4.67009  | 3.98836  | -0.37404 |
| H | 3.90077  | 3.23828  | 1.01561  |
| H | 3.25034  | 2.74695  | -1.94170 |
| H | 4.05839  | 1.60670  | -0.88551 |
| H | 0.50440  | 4.84697  | 0.37411  |
| C | 1.97489  | 0.85074  | 0.77363  |
| O | 0.69569  | 0.37896  | 1.10075  |
| H | 2.39839  | 1.44585  | 1.59531  |
| C | 2.88162  | -0.34130 | 0.52321  |
| C | 2.42451  | -1.42659 | -0.24026 |
| C | 4.17816  | -0.37800 | 1.05198  |
| C | 3.24798  | -2.52109 | -0.48129 |
| H | 1.41363  | -1.42332 | -0.63402 |
| C | 5.01689  | -1.46549 | 0.81978  |
| H | 4.53450  | 0.44635  | 1.66312  |
| C | 4.53658  | -2.52180 | 0.05139  |
| H | 2.91247  | -3.36791 | -1.06652 |
| H | 6.02002  | -1.51185 | 1.22408  |
| N | 5.41481  | -3.67572 | -0.20076 |
| O | 6.54797  | -3.64685 | 0.27966  |
| O | 4.96500  | -4.59903 | -0.87825 |

**I<sub>1a'</sub>**

Energy = -2059.02446298 au

|   |          |          |          |
|---|----------|----------|----------|
| C | -0.57226 | -3.50532 | 0.55612  |
| C | 0.23542  | -1.55389 | 1.74784  |
| C | -1.29599 | -1.53491 | 1.83278  |
| C | -1.65656 | -3.00270 | 1.54624  |
| H | -0.26809 | -4.51872 | 0.83775  |
| H | 0.67591  | -1.86698 | 2.70843  |
| H | 0.64398  | -0.57221 | 1.49621  |
| H | -1.64473 | -1.22711 | 2.81903  |
| H | -1.58321 | -3.57336 | 2.47681  |
| H | -2.66754 | -3.12183 | 1.15542  |
| C | -1.14794 | -3.64627 | -0.86842 |

|   |          |          |          |
|---|----------|----------|----------|
| O | -1.87104 | -4.57640 | -1.14163 |
| O | -0.84334 | -2.69962 | -1.76758 |
| H | -0.25337 | -2.00573 | -1.39832 |
| N | -1.93032 | -0.62535 | 0.85468  |
| H | -1.40923 | -0.54013 | -0.01816 |
| N | 0.52268  | -2.53132 | 0.69037  |
| S | -2.35021 | 0.92633  | 1.38956  |
| C | -3.74943 | 1.29645  | 0.33930  |
| C | -3.63710 | 2.29094  | -0.62915 |
| C | -4.94998 | 0.60583  | 0.52977  |
| C | -4.74326 | 2.58687  | -1.42677 |
| H | -2.70081 | 2.82422  | -0.74612 |
| C | -6.04056 | 0.91484  | -0.27368 |
| H | -5.02452 | -0.15560 | 1.29831  |
| C | -5.95514 | 1.90598  | -1.26629 |
| H | -4.66118 | 3.36207  | -2.18339 |
| H | -6.97643 | 0.38177  | -0.12960 |
| O | -2.80045 | 0.77372  | 2.77758  |
| O | -1.29182 | 1.90232  | 1.06902  |
| C | -7.14503 | 2.21418  | -2.14171 |
| H | -6.98341 | 3.11793  | -2.73451 |
| H | -7.34376 | 1.39032  | -2.83731 |
| H | -8.05157 | 2.35675  | -1.54449 |
| C | 2.89495  | -2.12076 | 0.86013  |
| C | 1.85372  | -2.83598 | 0.36968  |
| C | 2.07191  | -3.95575 | -0.63402 |
| C | 3.53571  | -4.41190 | -0.70622 |
| C | 4.48527  | -3.21453 | -0.78192 |
| C | 4.33630  | -2.34405 | 0.47181  |
| H | 1.73035  | -3.62594 | -1.62507 |
| H | 2.71829  | -1.35024 | 1.60299  |
| H | 3.77611  | -5.00493 | 0.18571  |
| H | 3.66640  | -5.07348 | -1.56930 |
| H | 5.52315  | -3.54651 | -0.89500 |
| H | 4.24506  | -2.62243 | -1.67642 |
| H | 4.87784  | -2.81228 | 1.30888  |
| H | 4.82939  | -1.37381 | 0.31911  |
| H | 1.44373  | -4.81739 | -0.38408 |
| C | 1.67634  | -0.07972 | -1.45988 |
| O | 0.48758  | -0.30722 | -1.26198 |
| H | 2.28947  | -0.78875 | -2.04516 |
| C | 2.38213  | 1.13090  | -0.99764 |
| C | 1.71307  | 2.11402  | -0.24794 |
| C | 3.73479  | 1.29578  | -1.33631 |
| C | 2.39788  | 3.25173  | 0.16252  |
| H | 0.66847  | 1.97869  | 0.01478  |
| C | 4.42754  | 2.43124  | -0.93129 |
| H | 4.24233  | 0.53212  | -1.91915 |
| C | 3.74171  | 3.38969  | -0.18762 |



|   |         |         |          |
|---|---------|---------|----------|
| H | 1.91456 | 4.02601 | 0.74459  |
| H | 5.47004 | 2.58930 | -1.17536 |
| N | 4.47005 | 4.59966 | 0.24535  |
| O | 5.65579 | 4.69169 | -0.06902 |
| O | 3.84556 | 5.43801 | 0.89156  |

**TS<sub>1a'</sub>**

Energy= -2059.00726657 au

|   |          |          |          |
|---|----------|----------|----------|
| C | 0.30098  | 3.75948  | 0.28054  |
| C | -0.14923 | 1.94613  | 1.86920  |
| C | 1.37164  | 2.08943  | 1.73190  |
| C | 1.53086  | 3.51877  | 1.18441  |
| H | -0.07906 | 4.77420  | 0.41558  |
| H | -0.50201 | 2.37477  | 2.81552  |
| H | -0.46083 | 0.90925  | 1.80440  |
| H | 1.86740  | 1.99332  | 2.69940  |
| H | 1.51900  | 4.22452  | 2.02098  |
| H | 2.46394  | 3.65652  | 0.63864  |
| C | 0.67465  | 3.67472  | -1.23362 |
| O | 1.27430  | 4.63346  | -1.67927 |
| O | 0.33729  | 2.61859  | -1.93292 |
| H | -0.03783 | 1.75371  | -1.41769 |
| N | 1.96169  | 1.07791  | 0.83343  |
| H | 1.29234  | 0.77276  | 0.11672  |
| N | -0.70210 | 2.77031  | 0.75866  |
| S | 2.53723  | -0.31127 | 1.62975  |
| C | 3.55217  | -1.03552 | 0.35232  |
| C | 3.14298  | -2.22027 | -0.25646 |
| C | 4.76048  | -0.42282 | 0.00858  |
| C | 3.95627  | -2.79147 | -1.23479 |
| H | 2.20871  | -2.68321 | 0.03913  |
| C | 5.55641  | -1.00745 | -0.96950 |
| H | 5.06885  | 0.49064  | 0.50481  |
| C | 5.16712  | -2.19628 | -1.60858 |
| H | 3.64461  | -3.71617 | -1.71210 |
| H | 6.49769  | -0.53798 | -1.24174 |
| O | 3.37745  | 0.17070  | 2.73286  |
| O | 1.43488  | -1.24796 | 1.92555  |
| C | 6.02987  | -2.80341 | -2.68752 |
| H | 5.78030  | -3.85411 | -2.85653 |
| H | 5.89445  | -2.27446 | -3.63873 |
| H | 7.09197  | -2.74110 | -2.43159 |
| C | -2.66263 | 1.42879  | 0.43737  |
| C | -1.92850 | 2.65191  | 0.26711  |
| C | -2.43753 | 3.69315  | -0.70371 |
| C | -3.97210 | 3.78520  | -0.72825 |
| C | -4.60522 | 2.40571  | -0.91810 |
| C | -4.17372 | 1.46283  | 0.21094  |
| H | -2.06379 | 3.42956  | -1.70307 |
| H | -2.40736 | 0.86882  | 1.33292  |

|   |          |          |          |
|---|----------|----------|----------|
| H | -4.32824 | 4.22656  | 0.21161  |
| H | -4.26964 | 4.46931  | -1.52935 |
| H | -5.69739 | 2.48490  | -0.93730 |
| H | -4.30447 | 1.99883  | -1.89217 |
| H | -4.65814 | 1.78102  | 1.14465  |
| H | -4.53153 | 0.44571  | 0.02483  |
| H | -2.00416 | 4.66960  | -0.47125 |
| C | -1.76015 | 0.38422  | -0.85908 |
| O | -0.46463 | 0.58906  | -0.80676 |
| H | -2.27204 | 0.76844  | -1.75789 |
| C | -2.22191 | -1.01875 | -0.54162 |
| C | -1.50468 | -1.81697 | 0.36326  |
| C | -3.34974 | -1.55372 | -1.18160 |
| C | -1.92225 | -3.11315 | 0.64464  |
| H | -0.60469 | -1.43280 | 0.83175  |
| C | -3.77839 | -2.85086 | -0.91280 |
| H | -3.88672 | -0.95839 | -1.91464 |
| C | -3.05836 | -3.61070 | 0.00540  |
| H | -1.38342 | -3.74220 | 1.34209  |
| H | -4.64353 | -3.28135 | -1.40079 |
| N | -3.50434 | -4.98087 | 0.29876  |
| O | -4.51326 | -5.39032 | -0.27721 |
| O | -2.84491 | -5.63799 | 1.10394  |

### **II<sub>1a</sub>'**

Energy= -2059.02071791 au

|   |          |          |          |
|---|----------|----------|----------|
| C | -1.78926 | -3.41921 | 0.27695  |
| C | -0.70930 | -1.88338 | 1.85478  |
| C | -2.23313 | -1.65030 | 1.87708  |
| C | -2.78340 | -2.99180 | 1.36599  |
| H | -1.70221 | -4.50255 | 0.19789  |
| H | -0.37477 | -2.38855 | 2.76776  |
| H | -0.16634 | -0.95397 | 1.71745  |
| H | -2.57418 | -1.43022 | 2.89101  |
| H | -2.79859 | -3.71350 | 2.19023  |
| H | -3.79200 | -2.90934 | 0.96012  |
| C | -2.22093 | -2.86272 | -1.16090 |
| O | -3.13330 | -3.50959 | -1.66490 |
| O | -1.60777 | -1.82869 | -1.57586 |
| H | -0.31801 | -0.91635 | -1.13764 |
| N | -2.67504 | -0.54027 | 1.02014  |
| H | -2.32540 | -0.62066 | 0.05842  |
| N | -0.49422 | -2.82409 | 0.71304  |
| S | -2.37812 | 1.00917  | 1.65857  |
| C | -2.95274 | 2.02777  | 0.31258  |
| C | -2.12314 | 2.23956  | -0.79214 |
| C | -4.21584 | 2.61167  | 0.40113  |
| C | -2.58935 | 3.04247  | -1.82945 |
| H | -1.13914 | 1.78314  | -0.84011 |
| C | -4.65635 | 3.41914  | -0.64489 |

|   |          |          |          |
|---|----------|----------|----------|
| H | -4.82820 | 2.43939  | 1.27918  |
| C | -3.85695 | 3.64155  | -1.77461 |
| H | -1.95541 | 3.21169  | -2.69539 |
| H | -5.63588 | 3.88499  | -0.58261 |
| O | -3.25714 | 1.15259  | 2.82453  |
| O | -0.93158 | 1.24390  | 1.84763  |
| C | -4.35612 | 4.48781  | -2.92002 |
| H | -3.54361 | 5.05777  | -3.38004 |
| H | -4.79712 | 3.86002  | -3.70397 |
| H | -5.12569 | 5.19217  | -2.59276 |
| C | 1.78520  | -2.03262 | 0.27086  |
| C | 0.61135  | -2.94238 | 0.03624  |
| C | 0.72343  | -3.91999 | -1.10359 |
| C | 2.06673  | -4.67864 | -1.08838 |
| C | 3.25571  | -3.71769 | -1.01436 |
| C | 3.12844  | -2.79595 | 0.20436  |
| H | 0.63575  | -3.33429 | -2.02898 |
| H | 1.70957  | -1.55850 | 1.25011  |
| H | 2.08878  | -5.35972 | -0.22775 |
| H | 2.12070  | -5.30449 | -1.98459 |
| H | 4.19349  | -4.28002 | -0.95223 |
| H | 3.30837  | -3.12881 | -1.93879 |
| H | 3.22190  | -3.40018 | 1.11595  |
| H | 3.94527  | -2.06954 | 0.23497  |
| H | -0.11197 | -4.61906 | -1.11662 |
| C | 1.65007  | -0.84107 | -0.79496 |
| O | 0.36509  | -0.29071 | -0.76437 |
| H | 1.88941  | -1.25589 | -1.78584 |
| C | 2.65155  | 0.25419  | -0.47644 |
| C | 2.32324  | 1.25276  | 0.45390  |
| C | 3.90330  | 0.28483  | -1.10562 |
| C | 3.23925  | 2.25442  | 0.76147  |
| H | 1.34032  | 1.25863  | 0.91422  |
| C | 4.83033  | 1.27952  | -0.80592 |
| H | 4.15301  | -0.46451 | -1.85162 |
| C | 4.48246  | 2.24929  | 0.13041  |
| H | 3.00539  | 3.03643  | 1.47282  |
| H | 5.80023  | 1.32253  | -1.28469 |
| N | 5.45551  | 3.30542  | 0.45337  |
| O | 6.54483  | 3.27355  | -0.12012 |
| O | 5.12429  | 4.15568  | 1.27856  |

### Transition state for the Desymmetrisation:

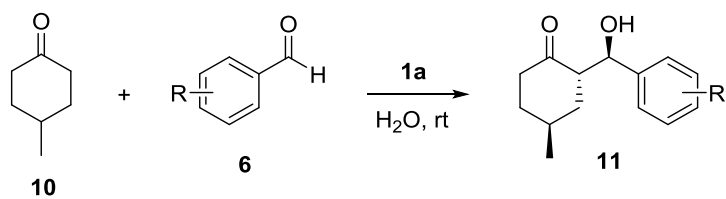

The absolute configuration of the desymmetrised adduct was confirmed based on comparison with the literature reports. The reaction may be expected to proceed via a transition state similar to the standard aldol addition, which is in accordance with the observed stereoselectivity (illustrated below).

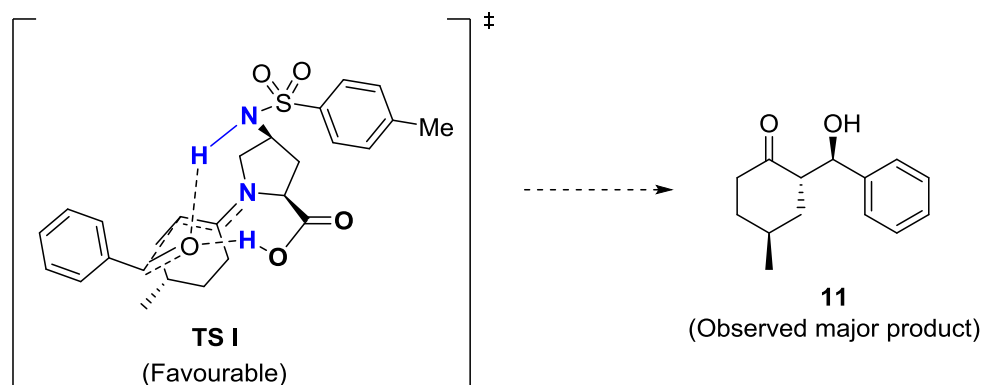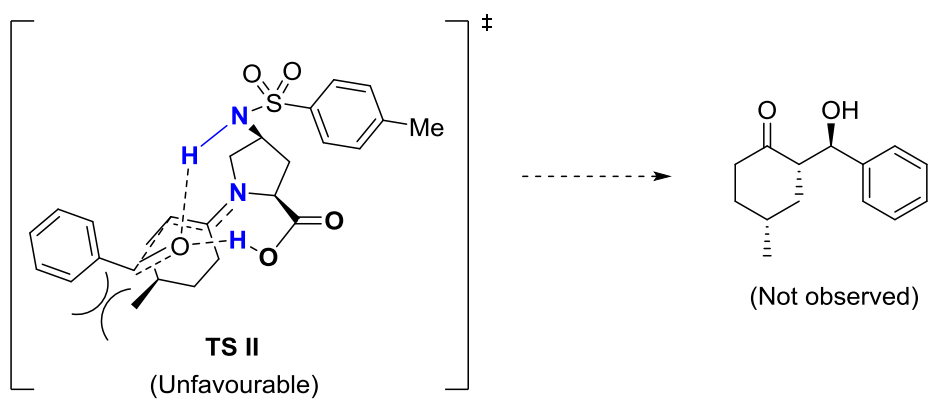

### Specific rotation of the aldol adducts:

The optical rotation was measured for a few purified aldol adducts and the corresponding specific rotation values are given below. It may be noted that the optical purity of the adducts, however, was determined by HPLC analysis on a chiral stationary phase, which follows further below:

- (S)-2-((R)-hydroxy(4-nitrophenyl)methyl)cyclohexan-1-one (**7a**)  
[ $\alpha$ ]<sub>D</sub><sup>23</sup> +13.6 (c 1.0, CHCl<sub>3</sub>) {Lit.<sup>4</sup> [ $\alpha$ ]<sub>D</sub><sup>25</sup> +12.8 (c 1.85, CHCl<sub>3</sub>)}
- 4-((R)-hydroxy((S)-2-oxocyclohexyl)methyl)benzotrile (**7b**)  
[ $\alpha$ ]<sub>D</sub><sup>23</sup> +26.0 (c 1.0, CHCl<sub>3</sub>) {Lit.<sup>5</sup> [ $\alpha$ ]<sub>D</sub><sup>20</sup> +24.4 (c 0.50, CHCl<sub>3</sub>)}
- (S)-2-((R)-hydroxy(4-(trifluoromethyl)phenyl)methyl)cyclohexan-1-one (**7c**)  
[ $\alpha$ ]<sub>D</sub><sup>23</sup> +14.2 (c 1.0, CHCl<sub>3</sub>) {Lit.<sup>5</sup> [ $\alpha$ ]<sub>D</sub><sup>20</sup> +16.3 (c 0.5, CHCl<sub>3</sub>)}
- (S)-2-((R)-(4-bromophenyl)(hydroxy)methyl)cyclohexan-1-one (**7d**)  
[ $\alpha$ ]<sub>D</sub><sup>23</sup> +21.0 (c 1.0, CHCl<sub>3</sub>) {Lit.<sup>6</sup> [ $\alpha$ ]<sub>D</sub><sup>25</sup> +24.0 (c 1.0, CHCl<sub>3</sub>)}
- methyl 4-((R)-hydroxy((S)-2-oxocyclohexyl)methyl)benzoate (**7f**)  
[ $\alpha$ ]<sub>D</sub><sup>23</sup> +25.0 (c 1.0, CHCl<sub>3</sub>) {Lit.<sup>7</sup> [ $\alpha$ ]<sub>D</sub><sup>20</sup> +23.8 (c 1.0, CHCl<sub>3</sub>)}
- (S)-2-((R)-hydroxy(pyridin-4-yl)methyl)cyclohexan-1-one (**7h**)  
[ $\alpha$ ]<sub>D</sub><sup>23</sup> +26.0 (c 1.0, CHCl<sub>3</sub>) {Lit.<sup>8</sup> [ $\alpha$ ]<sub>D</sub><sup>23</sup> +30.2 (c 0.96, CHCl<sub>3</sub>)}
- (S)-2-((R)-hydroxy(perfluorophenyl)methyl)cyclohexan-1-one (**7i**)  
[ $\alpha$ ]<sub>D</sub><sup>23</sup> -17.0 (c 1.0, CHCl<sub>3</sub>) {Lit.<sup>8</sup> [ $\alpha$ ]<sub>D</sub><sup>23</sup> -17.0 (c 1.4, CHCl<sub>3</sub>)}
- (S)-2-((R)-(2-chlorophenyl)(hydroxy)methyl)cyclohexan-1-one (**7k**)  
[ $\alpha$ ]<sub>D</sub><sup>23</sup> +23.0 (c 1.0, CHCl<sub>3</sub>) {Lit.<sup>8</sup> [ $\alpha$ ]<sub>D</sub><sup>23</sup> +21.2 (c 0.9, CHCl<sub>3</sub>)}
- (S)-2-((R)-hydroxy(3-nitrophenyl)methyl)cyclohexan-1-one (**7l**)  
[ $\alpha$ ]<sub>D</sub><sup>23</sup> +25.0 (c 1.0, CHCl<sub>3</sub>) {Lit.<sup>6</sup> [ $\alpha$ ]<sub>D</sub><sup>25</sup> +26.0 (c 1.0, CHCl<sub>3</sub>)}
- (S)-2-((R)-hydroxy(3-phenoxyphenyl)methyl)cyclohexan-1-one (**7n**)  
[ $\alpha$ ]<sub>D</sub><sup>23</sup> -59.3 (c 1.0, CHCl<sub>3</sub>)
- (S)-2-((R)-(4-chloro-3-nitrophenyl)(hydroxy)methyl)cyclohexan-1-one (**7o**)  
[ $\alpha$ ]<sub>D</sub><sup>23</sup> +51.0 (c 1.0, CHCl<sub>3</sub>)
- (S)-2-((R)-hydroxy(naphthalen-2-yl)methyl)cyclohexan-1-one (**7q**)  
[ $\alpha$ ]<sub>D</sub><sup>23</sup> +13.0 (c 1.0, CHCl<sub>3</sub>) {Lit.<sup>8</sup> [ $\alpha$ ]<sub>D</sub><sup>23</sup> +17.3 (c 0.8, CHCl<sub>3</sub>)}
- (S)-2-((R)-hydroxy(4-nitrophenyl)methyl)cyclopentan-1-one (**9a**)  
[ $\alpha$ ]<sub>D</sub><sup>23</sup> -25.6 (c 1.0, CHCl<sub>3</sub>) {Lit.<sup>6</sup> [ $\alpha$ ]<sub>D</sub><sup>25</sup> -25.0 (c 0.5, CHCl<sub>3</sub>)}
- (R)-4-hydroxy-4-(4-nitrophenyl)butan-2-one (**9b**)  
[ $\alpha$ ]<sub>D</sub><sup>23</sup> +52.0 (c 1.0, CHCl<sub>3</sub>) {Lit.<sup>8</sup> [ $\alpha$ ]<sub>D</sub><sup>23</sup> +54.0 (c 0.55, CHCl<sub>3</sub>)}
- 2-(Hydroxy(4-nitrophenyl)methyl)-4-methylcyclohexan-1-one (**11a**)  
[ $\alpha$ ]<sub>D</sub><sup>23</sup> -47.0 (c 1.0, CHCl<sub>3</sub>) {Lit.<sup>8</sup> [ $\alpha$ ]<sub>D</sub><sup>23</sup> -48.0 (c 0.55, CHCl<sub>3</sub>)}
- 4-((R)-hydroxy((1S,5S)-5-methyl-2-oxocyclohexyl)methyl)benzotrile (**11b**)  
[ $\alpha$ ]<sub>D</sub><sup>23</sup> +22.0 (c 1.0, CHCl<sub>3</sub>)

## References:

1. (a) A. D. Becke, Density-Functional Thermochemistry. III. The Role of Exact Exchange, *J. Chem. Phys.*, 1993, **98**, 5648-5652; (b) A. D. Becke, Density-Functional Exchange-Energy Approximation with Correct Asymptotic Behavior, *Phys. Rev. A*, 1988, **38**, 3098-3100; (c) C. Lee, W. Yang and R. G. Parr, Development of the Colle-Salvetti Correlation-Energy Formula into a Functional of the Electron Density, *Phys. Rev. B*, 1988, **37**, 785-789; (d) S. H. Vosko, L. Wilk and M. Nusair, Accurate Spin-Dependent Electron Liquid Correlation Energies for Local Spin Density Calculations: A Critical Analysis, *Can. J. Phys.*, 1980, **58**, 1200-1211.
2. (a) V. A. Rassolov, M. A. Ratner, J. A. Pople, P. C. Redfern and L. A. Curtiss, 6-31G\* Basis Set for Third-Row Atoms, *J. Comput. Chem.*, 2001, **22**, 976-984; (b) V. A. Rassolov, J. A. Pople, M. A. Ratner and T. L. Windus, 6-31G\* Basis Set for Atoms K through Zn, *J. Chem. Phys.*, 1998, **109**, 1223-1229; (c) R. Ditchfield, W. J. Hehre and J. A. Pople, Self-Consistent Molecular-Orbital Methods. IX. An Extended Gaussian-Type Basis for Molecular-Orbital Studies of Organic Molecules, *J. Chem. Phys.*, 1971, **54**, 720-723.
3. M. J. Frisch, G. W. Trucks, H. B. Schlegel, G. E. Scuseria, M. A. Robb, J. R. Cheeseman, G. Scalmani, V. Barone, B. Mennucci, G. A. Petersson, H. Nakatsuji, M. Caricato, X. Li, H. P. Hratchian, A. F. Izmaylov, J. Bloino, G. Zheng, J. L. Sonnenberg, M. Hada, M. Ehara, K. Toyota, R. Fukuda, J. Hasegawa, M. Ishida, T. Nakajima, Y. Honda, O. Kitao, H. Nakai, T. Vreven, J. A. Montgomery Jr., J. E. Peralta, F. Ogliaro, M. Bearpark, J. J. Heyd, E. Brothers, K. N. Kudin, V. N. Staroverov, R. Kobayashi, J. Normand, K. Raghavachari, A. Rendell, J. C. Burant, S. S. Iyengar, J. Tomasi, M. Cossi, N. Rega, J. M. Millam, M. Klene, J. E. Knox, J. B. Cross, V. Bakken, C. Adamo, J. Jaramillo, R. Gomperts, R. E. Stratmann, O. Yazyev, A. J. Austin, R. Cammi, C. Pomelli, J. W. Ochterski, R. L. Martin, K. Morokuma, V. G. Zakrzewski, G. A. Voth, P. Salvador, J. J. Dannenberg, S. Dapprich, A. D. Daniels, Ö. Farkas, J. B. Foresman, J. v. Ortiz, J. Cioslowski, Fox, D. J. Gaussian~09 Revision E.01.
4. J. Li, G. Yang, Y. Qin, X. Yang and C. Yuanchen, Recyclable Merrifield resin-supported thiourea organocatalysts derived from L-proline for direct asymmetric aldol reaction, *Tetrahedron: Asymmetry*, 2011, **22**, 613-618.
5. T. Mino, A. Omura, Y. Uda, K. Wakui, Y. Haga, M. Sakamoto and T. Fujita, Chiral phosphine-prolineamide as an organocatalyst in direct asymmetric aldol reactions, *Tetrahedron: Asymmetry*, 2011, **22**, 2024-2028.
6. R. S. Rambo, C. G. Jacoby, T. L. da Silva and P. H. Schneider, A highly enantio- and diastereoselective direct aldol reaction in aqueous medium catalyzed by thiazolidine-based compounds, *Tetrahedron: Asymmetry*, 2015, **26**, 632-637.
7. D. Gryko and W. j. Saletta, Organocatalytic asymmetric aldol reaction in the presence of water, *Org. Biomol. Chem.*, 2007, **5**, 2148-2153.
8. H. Yang, S. Mahapatra, P. H.-Y. Cheong and R. G. Carter, Highly Stereoselective and Scalable anti-Aldol Reactions Using N-(p-Dodecylphenylsulfonyl)-2-pyrrolidinecarboxamide: Scope and Origins of Stereoselectivities, *J. Org. Chem.*, 2010, **75**, 7279-7290.

## HPLC Data of the Purified Aldol Adducts

Table 1, Entry 7

Daicel CHIRALPAK AD-H, hexane/2-propanol = 87.5:12.5, flow rate: 0.8 mL min<sup>-1</sup>,  $\lambda = 254$  nm

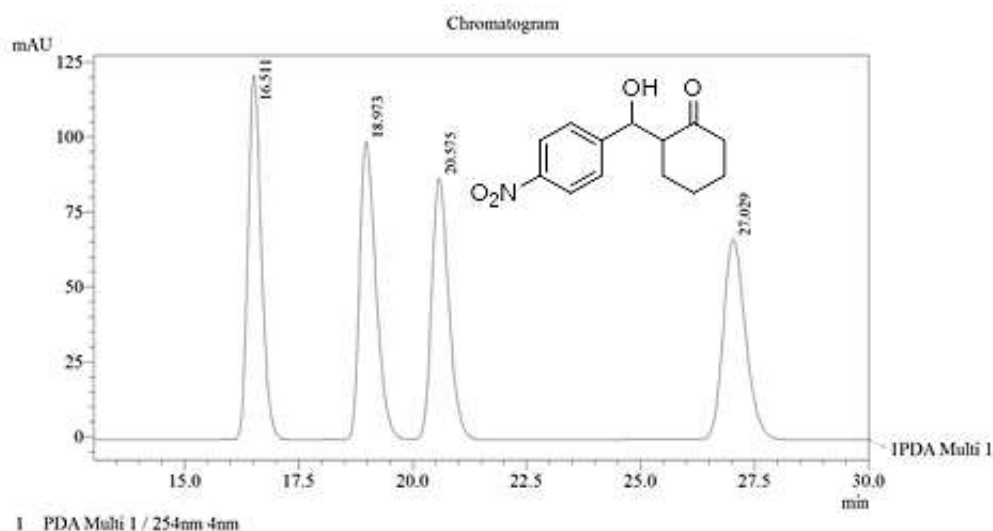

Peak Table

| Peak# | Ret. Time | Area    | Area Percent | Width |
|-------|-----------|---------|--------------|-------|
| 1     | 16.511    | 2463924 | 26.173       | 0.539 |
| 2     | 18.973    | 2474027 | 26.280       | 0.659 |
| 3     | 20.575    | 2233850 | 23.729       | 0.684 |
| 4     | 27.029    | 2242264 | 23.818       | 0.893 |
| Total |           | 9414064 | 100.000      |       |

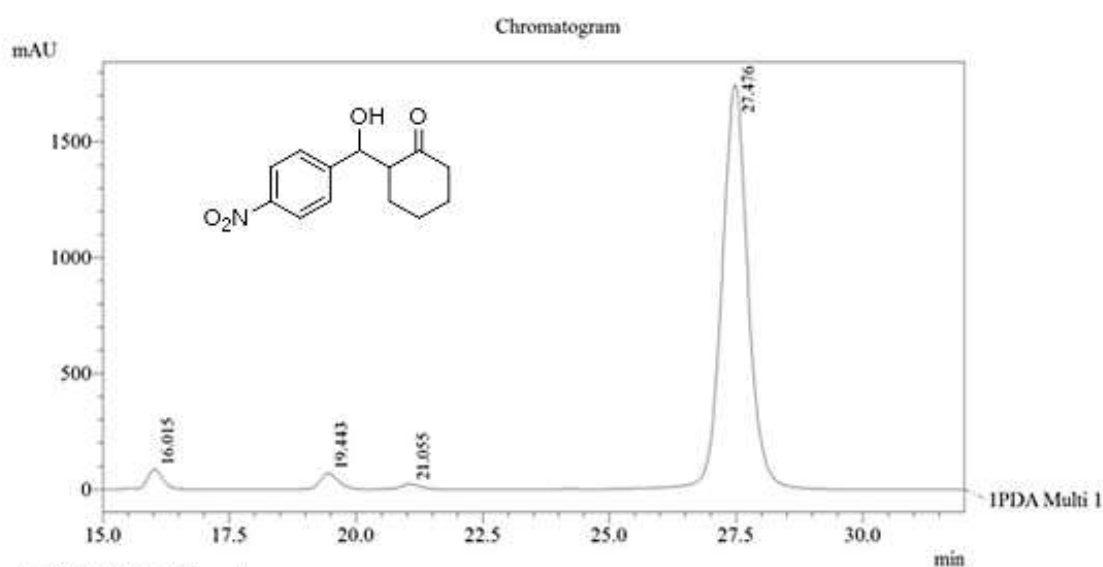

PeakTable

| Peak# | Ret. Time | Area     | Area Percent | Width |
|-------|-----------|----------|--------------|-------|
| 1     | 16.015    | 1670575  | 2.519        | 0.524 |
| 2     | 19.443    | 1678559  | 2.531        | 0.655 |
| 3     | 21.055    | 590343   | 0.890        | 0.691 |
| 4     | 27.476    | 62374302 | 94.059       | 0.915 |
| Total |           | 66313779 | 100.000      |       |

**Table 2, Entry 1**

Daicel CHIRALPAK AD-H, hexane/2-propanol = 90:10, flow rate: 0.5 mL min<sup>-1</sup>, λ = 254 nm

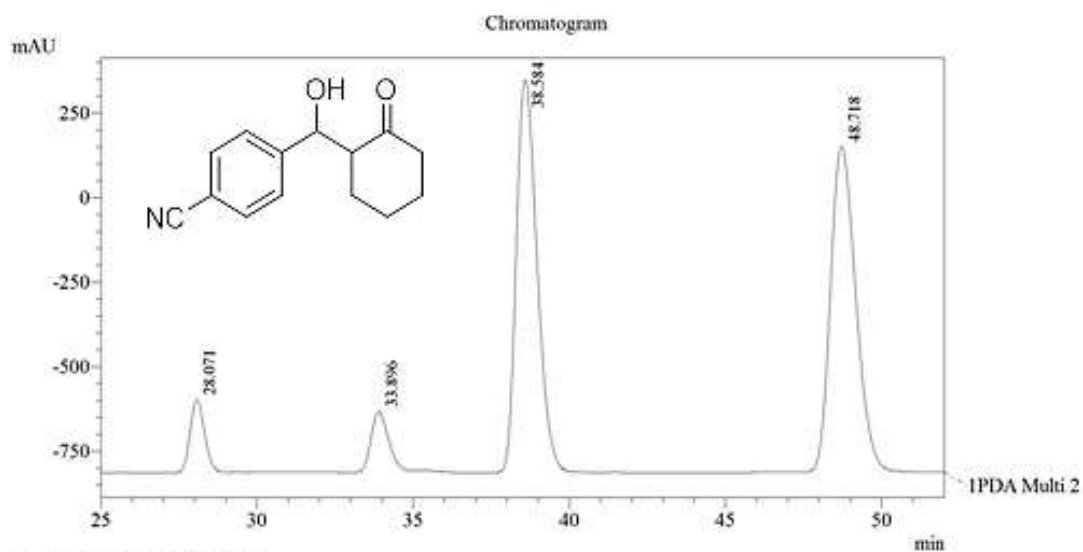

PeakTable

| Peak# | Ret. Time | Area      | Area Percent | Width |
|-------|-----------|-----------|--------------|-------|
| 1     | 28.071    | 6832745   | 5.664        | 0.848 |
| 2     | 33.896    | 6676405   | 5.534        | 1.016 |
| 3     | 38.584    | 53238966  | 44.130       | 1.208 |
| 4     | 48.718    | 53893911  | 44.673       | 1.478 |
| Total |           | 120642027 | 100.000      |       |

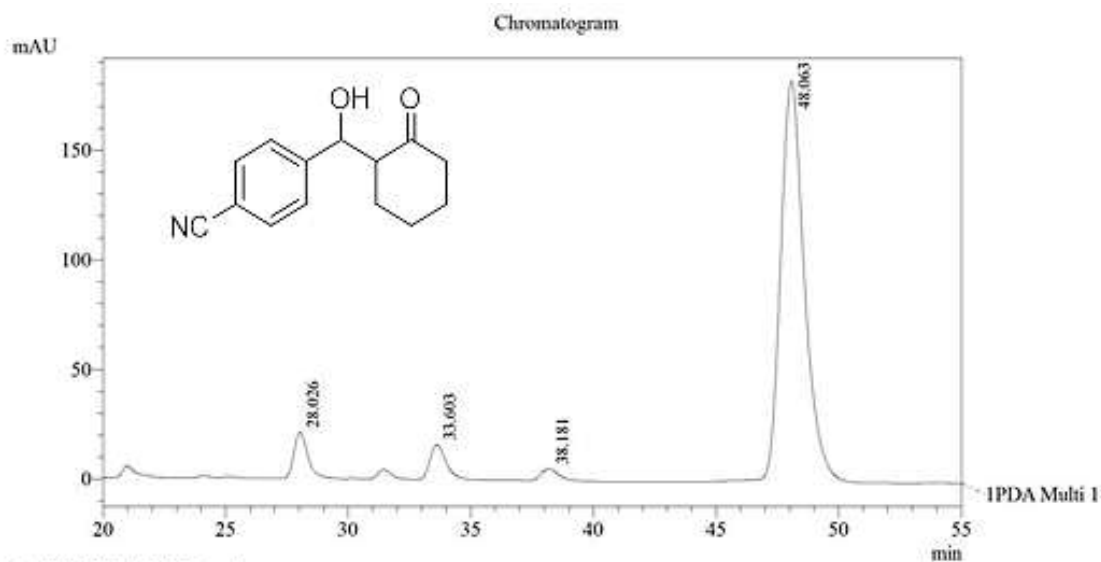

PeakTable

| Peak# | Ret. Time | Area     | Area Percent | Width |
|-------|-----------|----------|--------------|-------|
| 1     | 28.026    | 831930   | 5.872        | 0.998 |
| 2     | 33.603    | 711812   | 5.024        | 1.161 |
| 3     | 38.181    | 280854   | 1.982        | 1.289 |
| 4     | 48.063    | 12342286 | 87.121       | 1.735 |
| Total |           | 14166881 | 100.000      |       |



**Table 2, Entry 2**Daicel CHIRALCEL OD-H, hexane/2-propanol = 95:5, flow rate: 0.5 mL min<sup>-1</sup>, λ = 217 nm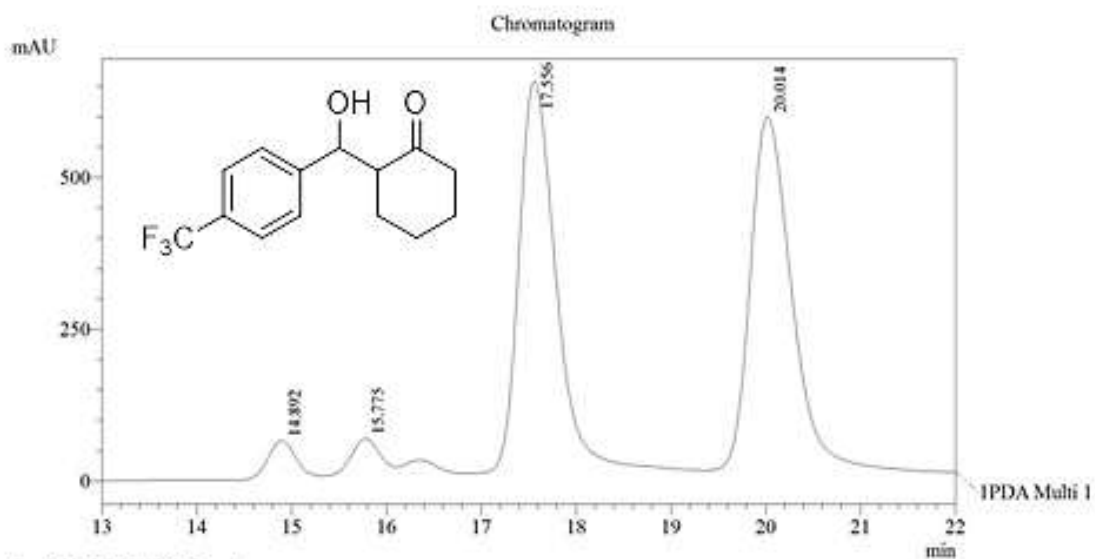

PeakTable

PDA Ch1 217nm 4nm

| Peak# | Ret. Time | Area     | Area Percent | Width |
|-------|-----------|----------|--------------|-------|
| 1     | 14.892    | 1156099  | 3.186        | 0.521 |
| 2     | 15.775    | 998246   | 2.751        | 0.513 |
| 3     | 17.556    | 16887162 | 46.534       | 0.683 |
| 4     | 20.014    | 17248144 | 47.529       | 0.772 |
| Total |           | 36289652 | 100.000      |       |

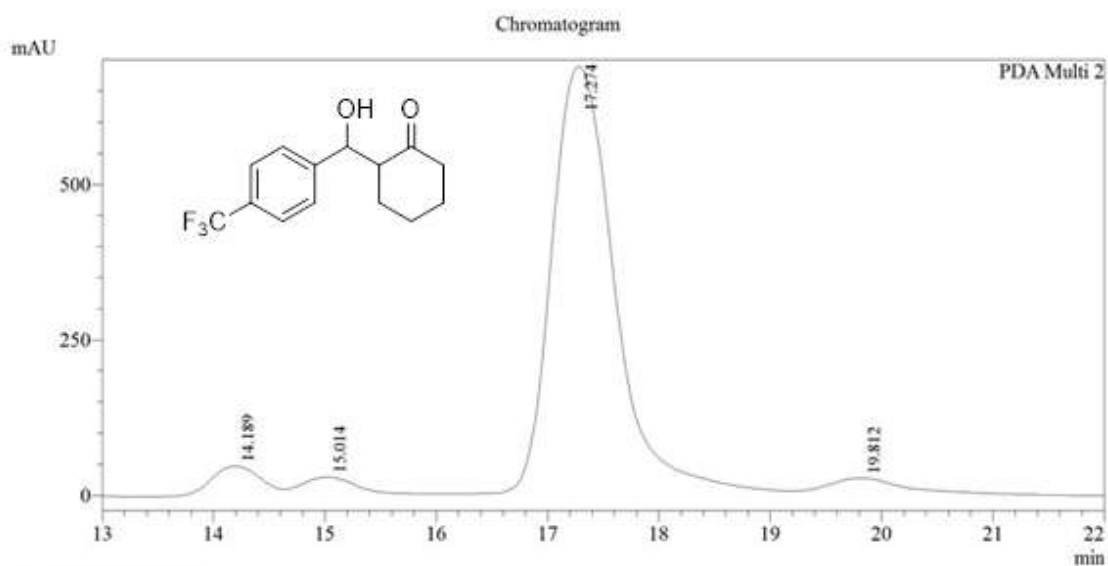

PeakTable

PDA Ch2 217nm 4nm

| Peak# | Ret. Time | Area     | Area Percent | Width |
|-------|-----------|----------|--------------|-------|
| 1     | 14.189    | 1153847  | 3.953        | 0.728 |
| 2     | 15.014    | 577608   | 1.979        | 0.723 |
| 3     | 17.274    | 26571846 | 91.030       | 0.952 |
| 4     | 19.812    | 886843   | 3.038        | 0.995 |
| Total |           | 29190144 | 100.000      |       |

**Table 2, Entry 3**

Daicel CHIRALPAK AD-H, hexane/2-propanol = 90:10, flow rate: 0.5 mL min<sup>-1</sup>, λ = 254 nm

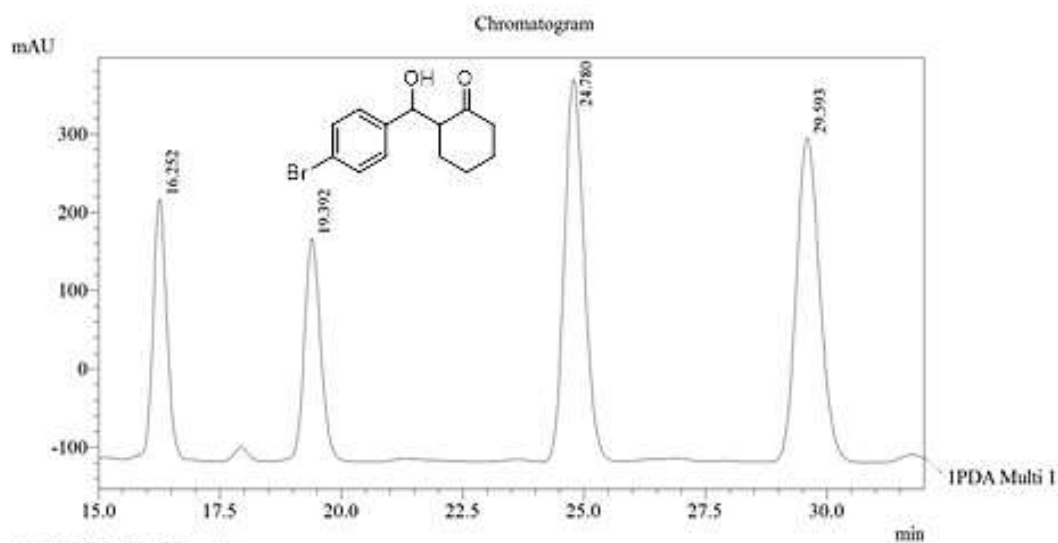

Peak Table

| Peak# | Ret. Time | Area     | Area Percent | Width |
|-------|-----------|----------|--------------|-------|
| 1     | 16.252    | 6504825  | 16.168       | 0.519 |
| 2     | 19.392    | 6502949  | 16.163       | 0.610 |
| 3     | 24.780    | 13436894 | 33.397       | 0.745 |
| 4     | 29.593    | 13789067 | 34.272       | 0.887 |
| Total |           | 40233735 | 100.000      |       |

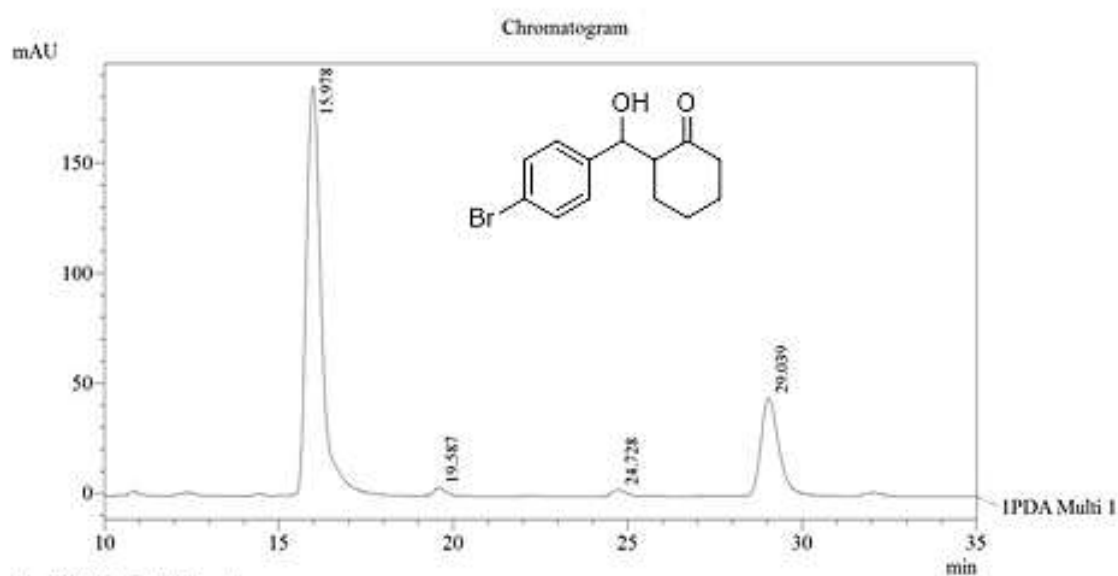

Peak Table

| Peak# | Ret. Time | Area    | Area Percent | Width |
|-------|-----------|---------|--------------|-------|
| 1     | 15.978    | 5611979 | 75.815       | 0.728 |
| 2     | 19.587    | 95707   | 1.293        | 0.635 |
| 3     | 24.728    | 85622   | 1.157        | 0.744 |
| 4     | 29.039    | 1608861 | 21.735       | 0.919 |
| Total |           | 7402169 | 100.000      |       |

**Table 2, Entry 4**

Daicel CHIRALPAK AD-H, hexane/2-propanol = 90:10, flow rate: 0.5 mL min<sup>-1</sup>, λ = 254 nm

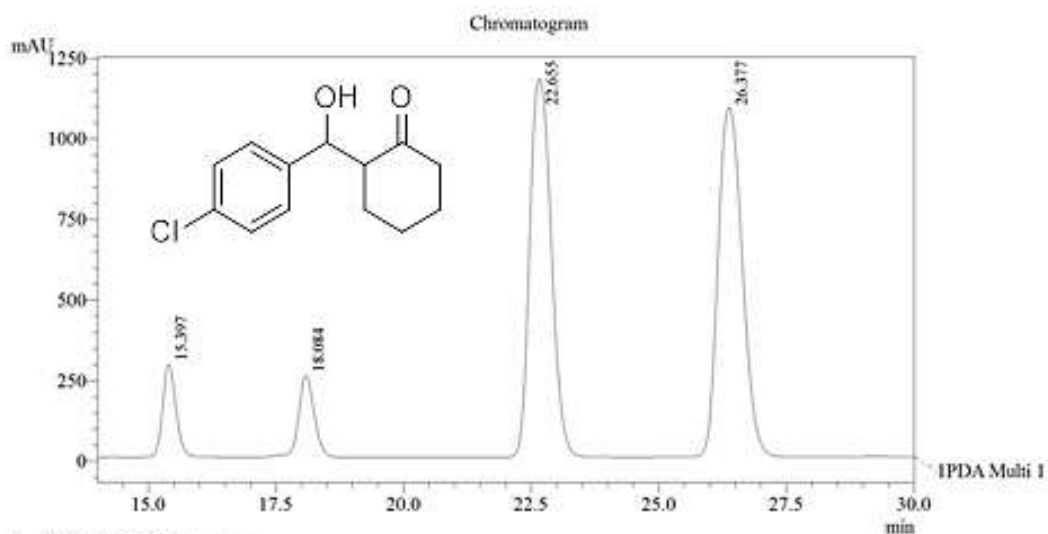

1 PDA Multi 1 / 220nm 4nm

PeakTable

| PDA Ch1 220nm 4nm |           |          |              |       |  |
|-------------------|-----------|----------|--------------|-------|--|
| Peak#             | Ret. Time | Area     | Area Percent | Width |  |
| 1                 | 15.397    | 5173393  | 6.489        | 0.486 |  |
| 2                 | 18.084    | 5068146  | 6.357        | 0.553 |  |
| 3                 | 22.655    | 33901442 | 42.522       | 0.744 |  |
| 4                 | 26.377    | 35584221 | 44.632       | 0.849 |  |
| Total             |           | 79727201 | 100.000      |       |  |

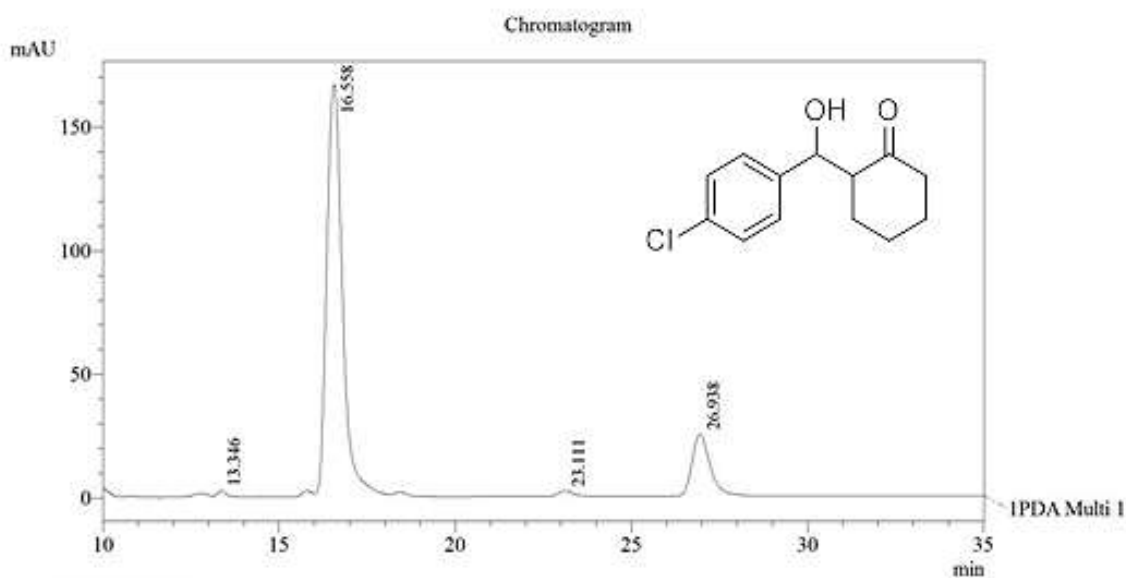

1 PDA Multi 1 / 254nm 4nm

PeakTable

| PDA Ch1 254nm 4nm |           |         |              |       |  |
|-------------------|-----------|---------|--------------|-------|--|
| Peak#             | Ret. Time | Area    | Area Percent | Width |  |
| 1                 | 13.346    | 88877   | 1.397        | 0.440 |  |
| 2                 | 16.558    | 5310723 | 83.505       | 0.770 |  |
| 3                 | 23.111    | 65722   | 1.033        | 0.751 |  |
| 4                 | 26.938    | 894437  | 14.064       | 0.907 |  |
| Total             |           | 6359758 | 100.000      |       |  |

**Table 2, Entry 5**

Daicel CHIRALPAK AS-H, hexane/2-propanol = 80:20, flow rate: 0.5 mL min<sup>-1</sup>, λ = 254 nm

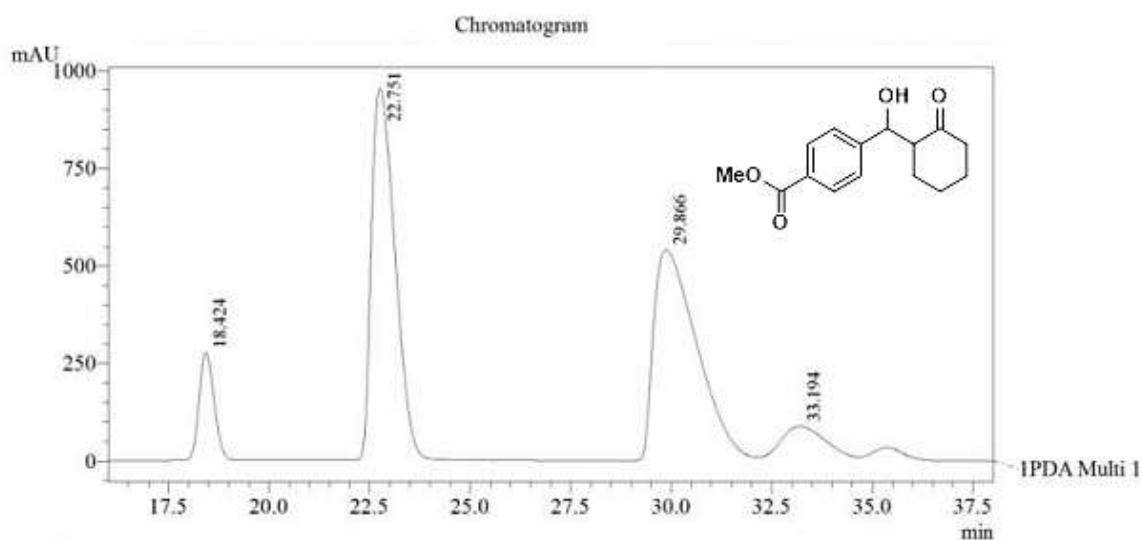

1 PDA Multi 1 / 254nm 4nm

Peak Table

PDA Ch1 254nm 4nm

| Peak# | Ret. Time | Area     | Area Percent | Width |
|-------|-----------|----------|--------------|-------|
| 1     | 18.424    | 7048568  | 7.764        | 0.691 |
| 2     | 22.751    | 38530859 | 42.439       | 1.086 |
| 3     | 29.866    | 39612511 | 43.631       | 2.017 |
| 4     | 33.194    | 5598374  | 6.166        | 1.947 |
| Total |           | 90790312 | 100.000      |       |

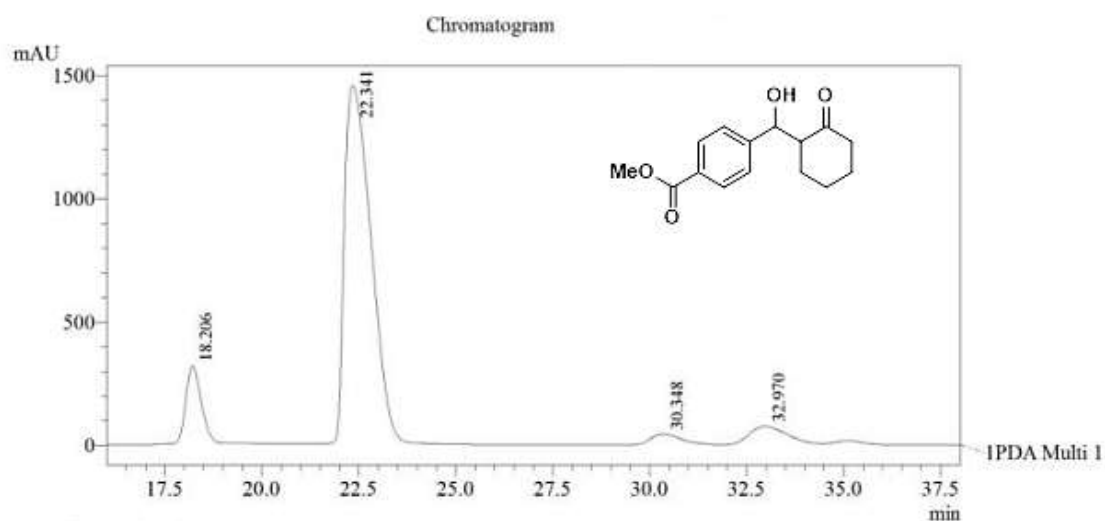

1 PDA Multi 1 / 254nm 4nm

Peak Table

PDA Ch1 254nm 4nm

| Peak# | Ret. Time | Area     | Area Percent | Width |
|-------|-----------|----------|--------------|-------|
| 1     | 18.206    | 8564866  | 10.189       | 0.731 |
| 2     | 22.341    | 68657770 | 81.675       | 1.263 |
| 3     | 30.348    | 2145331  | 2.552        | 1.342 |
| 4     | 32.970    | 4694471  | 5.585        | 1.772 |
| Total |           | 84062437 | 100.000      |       |

**Table 2, Entry 6**

Daicel CHIRALPAK AD-H, hexane/2-propanol = 92:8, flow rate: 0.8 mL min<sup>-1</sup>, λ = 254 nm

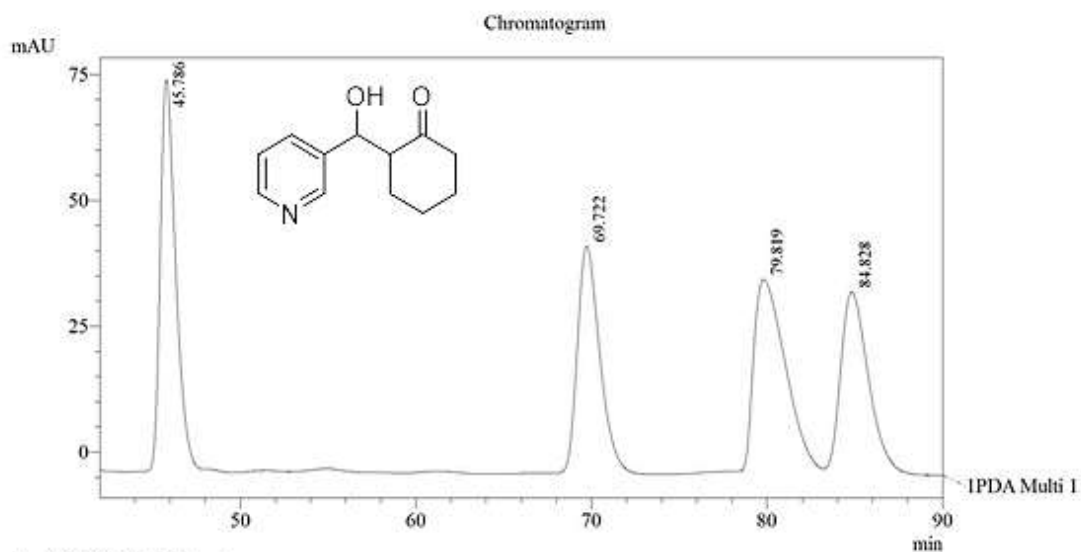

1 PDA Multi 1 / 254nm 4nm

PeakTable

| PDA ChI 254nm 4nm |           |          |              |       |
|-------------------|-----------|----------|--------------|-------|
| Peak#             | Ret. Time | Area     | Area Percent | Width |
| 1                 | 45.786    | 4746087  | 27.920       | 1.596 |
| 2                 | 69.722    | 4006024  | 23.567       | 2.333 |
| 3                 | 79.819    | 4529064  | 26.644       | 3.329 |
| 4                 | 84.828    | 3717425  | 21.869       | 2.826 |
| Total             |           | 16998600 | 100.000      |       |

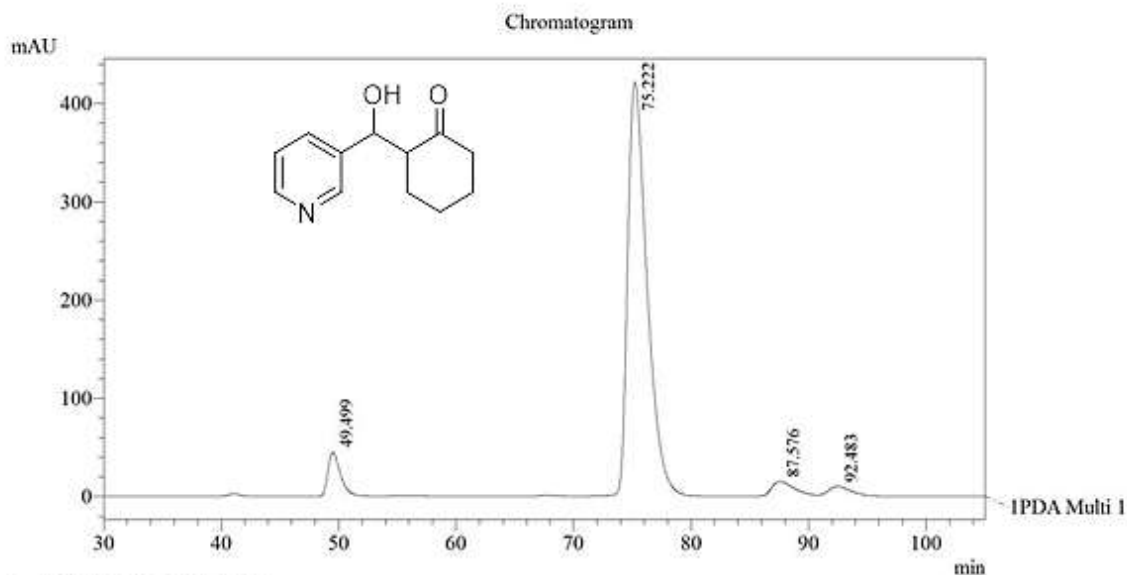

1 PDA Multi 1 / 254nm 4nm

PeakTable

| PDA ChI 254nm 4nm |           |          |              |       |
|-------------------|-----------|----------|--------------|-------|
| Peak#             | Ret. Time | Area     | Area Percent | Width |
| 1                 | 49.499    | 3275727  | 6.063        | 1.892 |
| 2                 | 75.222    | 47923833 | 88.696       | 2.930 |
| 3                 | 87.576    | 1819860  | 3.368        | 3.393 |
| 4                 | 92.483    | 1012254  | 1.873        | 3.152 |
| Total             |           | 54031674 | 100.000      |       |

**Table 2, Entry 7**

Daicel CHIRALPAK AD-H, hexane/2-propanol = 90:10, flow rate: 1.0 mL min<sup>-1</sup>, λ = 254 nm

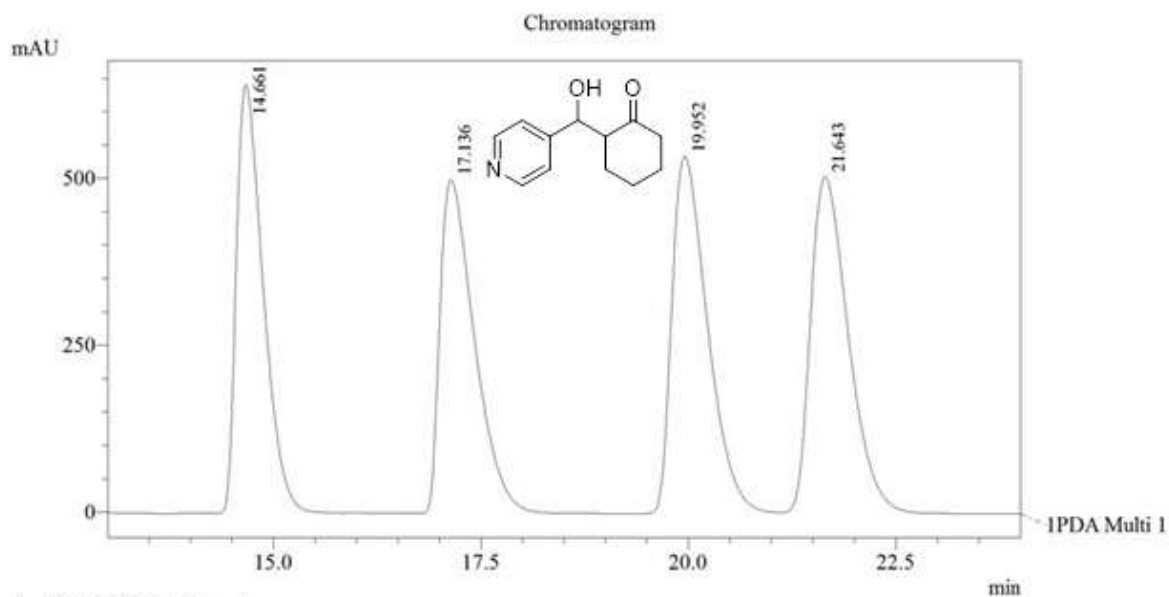

1 PDA Multi 1 / 254nm 4nm

PeakTable

PDA Ch1 254nm 4nm

| Peak# | Ret. Time | Area     | Area Percent | Width |
|-------|-----------|----------|--------------|-------|
| 1     | 14.661    | 14232997 | 23.761       | 0.597 |
| 2     | 17.136    | 14264060 | 23.813       | 0.759 |
| 3     | 19.952    | 15526861 | 25.921       | 0.782 |
| 4     | 21.643    | 15877047 | 26.505       | 0.832 |
| Total |           | 59900965 | 100.000      |       |

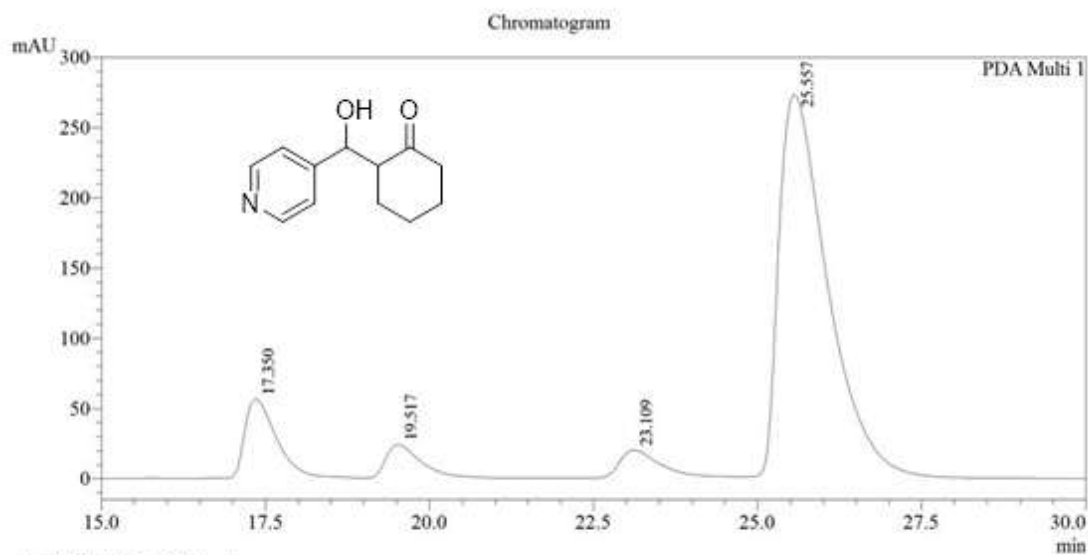

1 PDA Multi 1 / 254nm 4nm

PeakTable

PDA Ch1 254nm 4nm

| Peak# | Ret. Time | Area     | Area Percent | Width |
|-------|-----------|----------|--------------|-------|
| 1     | 17.350    | 1852211  | 10.569       | 0.857 |
| 2     | 19.517    | 861758   | 4.918        | 0.936 |
| 3     | 23.109    | 780524   | 4.454        | 1.051 |
| 4     | 25.557    | 14029666 | 80.059       | 1.312 |
| Total |           | 17524160 | 100.000      |       |

**Table 2, Entry 8**

Daicel CHIRALPAK AD-H, hexane/2-propanol = 91.5:9.5, flow rate: 0.5 mL min<sup>-1</sup>, λ = 254

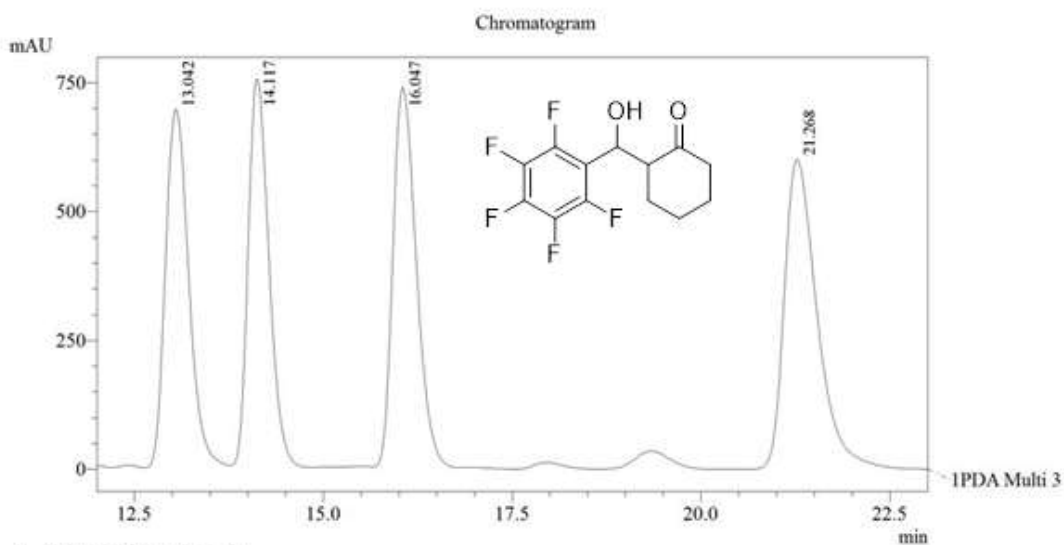

1 PDA Multi 3 / 220nm 4nm

PeakTable

| PDA Ch3 220nm 4nm |           |          |              |       |  |
|-------------------|-----------|----------|--------------|-------|--|
| Peak#             | Ret. Time | Area     | Area Percent | Width |  |
| 1                 | 13.042    | 14774896 | 23.479       | 0.558 |  |
| 2                 | 14.117    | 14272469 | 22.680       | 0.507 |  |
| 3                 | 16.047    | 15805005 | 25.116       | 0.569 |  |
| 4                 | 21.268    | 18076518 | 28.725       | 0.768 |  |
| Total             |           | 62928888 | 100.000      |       |  |

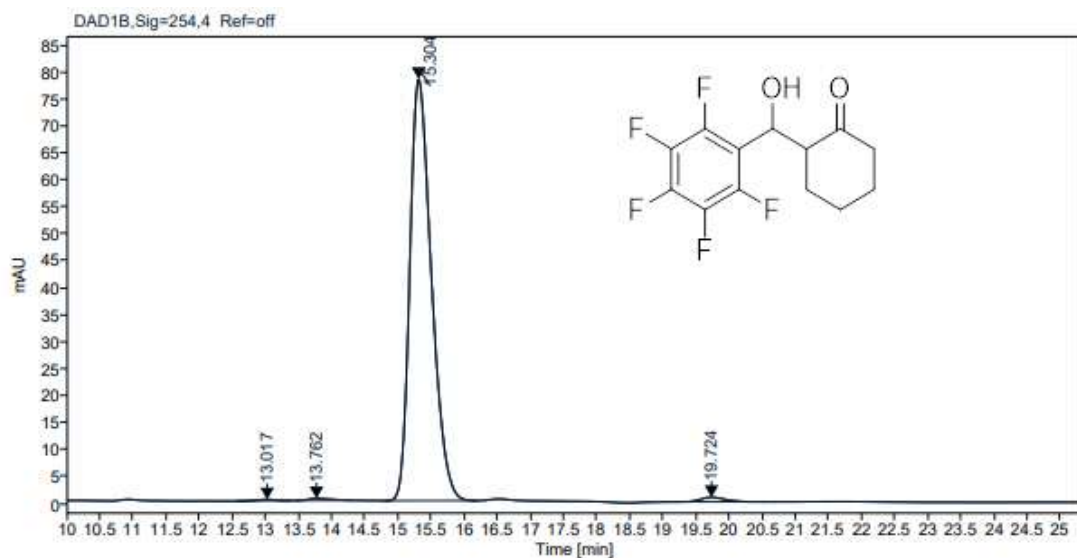

Signal: DAD1B, Sig=254,4 Ref=off

| RT [min] | Type | Width [min] | Area      | Height  | Area%   |
|----------|------|-------------|-----------|---------|---------|
| 13.017   | MM m | 0.2442      | 4.6812    | 0.2312  | 0.2600  |
| 13.762   | MM m | 0.2962      | 8.2243    | 0.3499  | 0.4568  |
| 15.304   | BB   | 1.3967      | 1766.8792 | 78.1140 | 98.1349 |
| 19.724   | MM m | 0.3347      | 20.6748   | 0.8356  | 1.1483  |
| Sum      |      |             | 1800.4596 |         |         |

**Table 2, Entry 9**

Daicel CHIRALPAK AD-H, hexane/2-propanol = 95:5, flow rate: 0.5 mL min<sup>-1</sup>, λ = 254 nm

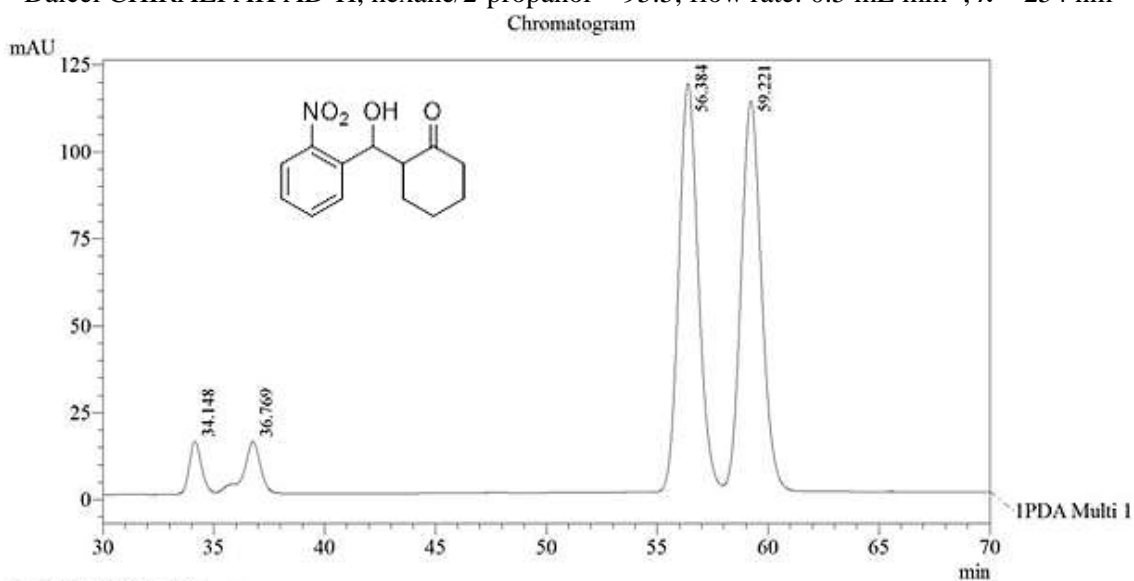

1 PDA Multi 1 / 254nm 4nm

PeakTable

PDA Ch1 254nm 4nm

| Peak# | Ret. Time | Area     | Area Percent | Width |
|-------|-----------|----------|--------------|-------|
| 1     | 34.148    | 609549   | 3.875        | 1.009 |
| 2     | 36.769    | 782747   | 4.976        | 1.229 |
| 3     | 56.384    | 7169349  | 45.574       | 1.608 |
| 4     | 59.221    | 7169422  | 45.575       | 1.680 |
| Total |           | 15731067 | 100.000      |       |

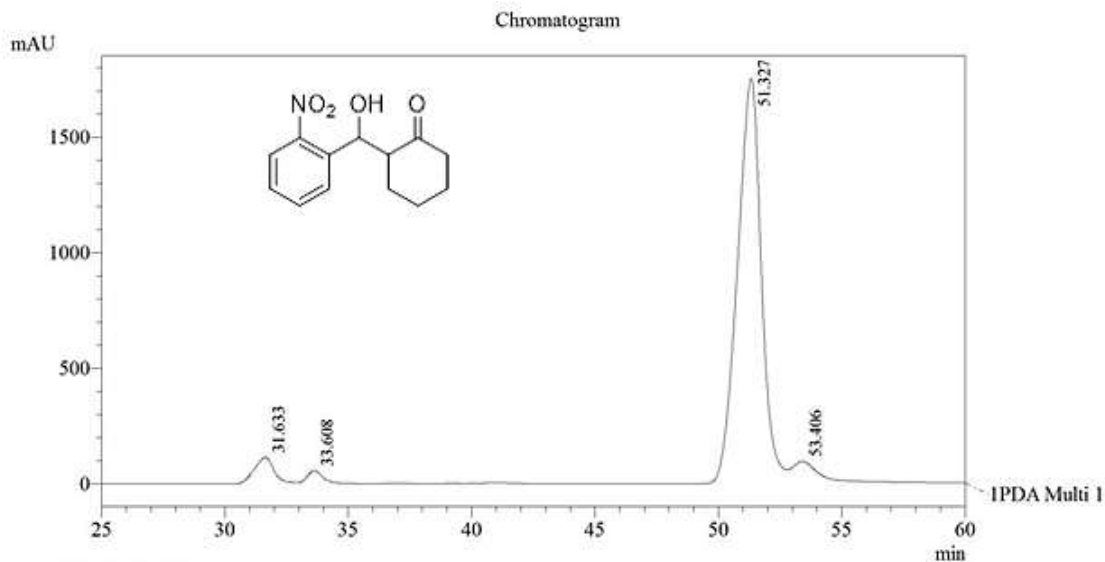

1 PDA Multi 1 / 254nm 4nm

PeakTable

PDA Ch1 254nm 4nm

| Peak# | Ret. Time | Area      | Area Percent | Width |
|-------|-----------|-----------|--------------|-------|
| 1     | 31.633    | 5820763   | 4.816        | 1.441 |
| 2     | 33.608    | 2165859   | 1.792        | 1.078 |
| 3     | 51.327    | 111112091 | 91.929       | 1.762 |
| 4     | 53.406    | 1768807   | 1.463        | 1.264 |
| Total |           | 120867520 | 100.000      |       |



**Table 2, Entry 10**

Daicel CHIRALCEL OD-H, hexane/2-propanol = 95:5, flow rate: 1 mL min<sup>-1</sup>, λ = 220 nm

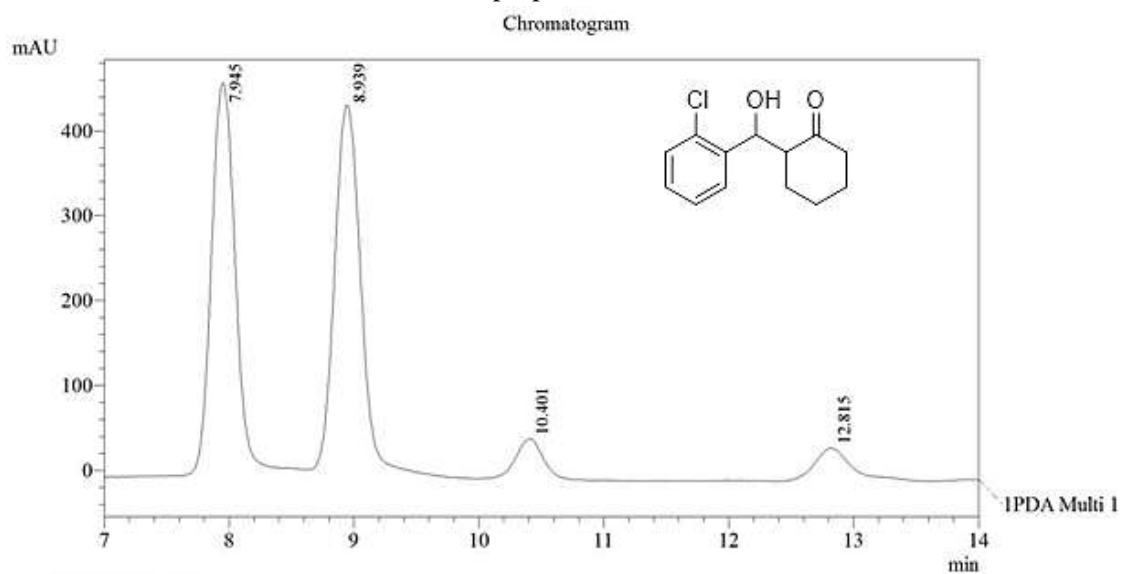

1 PDA Multi 1 / 190nm 4nm

PeakTable

| PDA Ch1 190nm 4nm |           |          |              |       |
|-------------------|-----------|----------|--------------|-------|
| Peak#             | Ret. Time | Area     | Area Percent | Width |
| 1                 | 7.945     | 5899685  | 44.060       | 0.344 |
| 2                 | 8.939     | 6187375  | 46.209       | 0.377 |
| 3                 | 10.401    | 662743   | 4.950        | 0.396 |
| 4                 | 12.815    | 640176   | 4.781        | 0.480 |
| Total             |           | 13389978 | 100.000      |       |

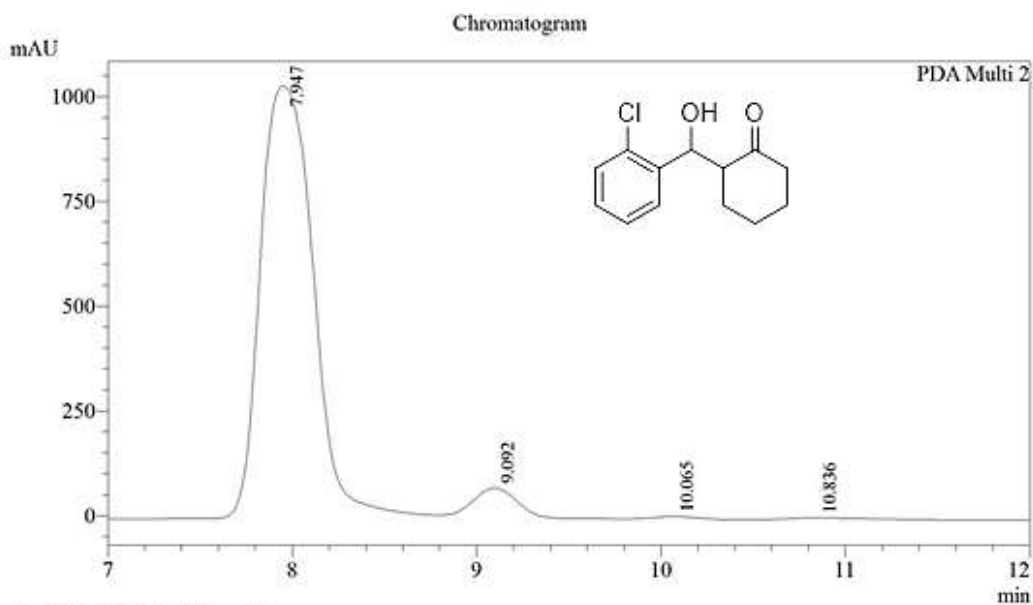

1 PDA Multi 2 / 220nm 4nm

PeakTable

| PDA Ch2 220nm 4nm |           |          |              |       |
|-------------------|-----------|----------|--------------|-------|
| Peak#             | Ret. Time | Area     | Area Percent | Width |
| 1                 | 7.947     | 20292277 | 94.025       | 0.480 |
| 2                 | 9.092     | 1041927  | 4.828        | 0.429 |
| 3                 | 10.065    | 96879    | 0.449        | 0.450 |
| 4                 | 10.836    | 150650   | 0.698        | 0.872 |
| Total             |           | 21581732 | 100.000      |       |

**Table 2, Entry 11**

Daicel CHIRALPAK AD-H, hexane/2-propanol = 90:10, flow rate: 1 mLmin<sup>-1</sup>, λ = 254 nm

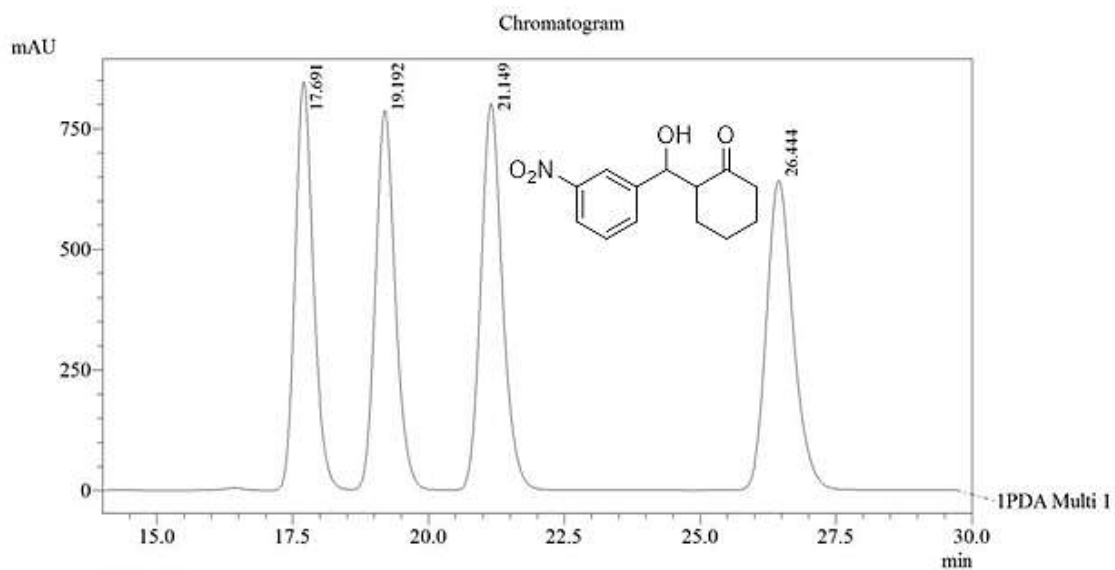

I PDA Multi 1 / 254nm 4nm

PeakTable

PDA Ch1 254nm 4nm

| Peak# | Ret. Time | Area     | Area Percent | Width |
|-------|-----------|----------|--------------|-------|
| 1     | 17.691    | 19758413 | 23.813       | 0.616 |
| 2     | 19.192    | 19614529 | 23.640       | 0.661 |
| 3     | 21.149    | 21868775 | 26.357       | 0.718 |
| 4     | 26.444    | 21731034 | 26.191       | 0.889 |
| Total |           | 82972752 | 100.000      |       |

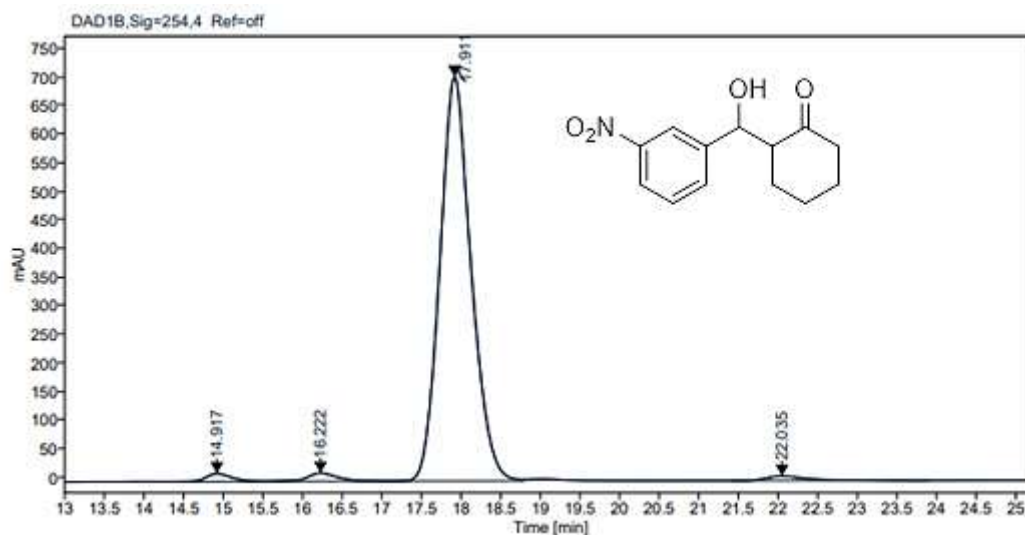

Signal: DAD1B,Sig=254,4 Ref=off

| RT [min] | Type | Width [min] | Area       | Height   | Area%   |
|----------|------|-------------|------------|----------|---------|
| 14.917   | BV   | 1.0433      | 301.2994   | 13.8304  | 1.4876  |
| 16.222   | VB   | 1.4683      | 371.6205   | 14.3989  | 1.8347  |
| 17.911   | BV   | 1.8003      | 19290.1303 | 706.3337 | 95.2378 |
| 22.035   | BB   | 2.4733      | 291.6395   | 7.9135   | 1.4399  |
| Sum      |      |             | 20254.6898 |          |         |

**Table 2, Entry 12**

Daicel CHIRALCEL OD-H, hexane/2-propanol = 97:3, flow rate: 0.8 mL min<sup>-1</sup>, λ = 254 nm

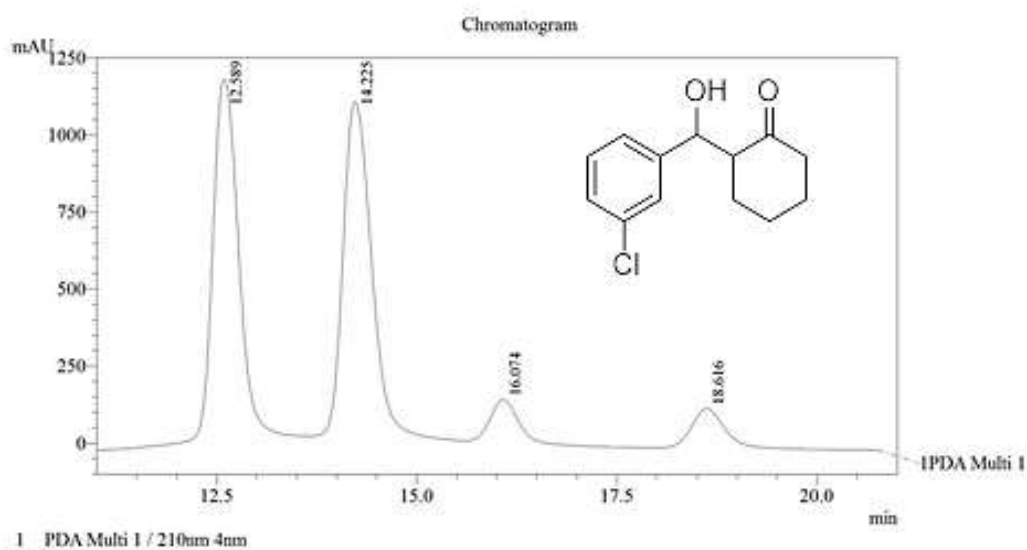

PeakTable

| PDA Ch1 210nm 4nm |           |          |              |       |
|-------------------|-----------|----------|--------------|-------|
| Peak#             | Ret. Time | Area     | Area Percent | Width |
| 1                 | 12.589    | 25486034 | 43.608       | 0.562 |
| 2                 | 14.225    | 26192340 | 44.817       | 0.628 |
| 3                 | 16.074    | 3261713  | 5.581        | 0.633 |
| 4                 | 18.616    | 3503287  | 5.994        | 0.731 |
| Total             |           | 58443374 | 100.000      |       |

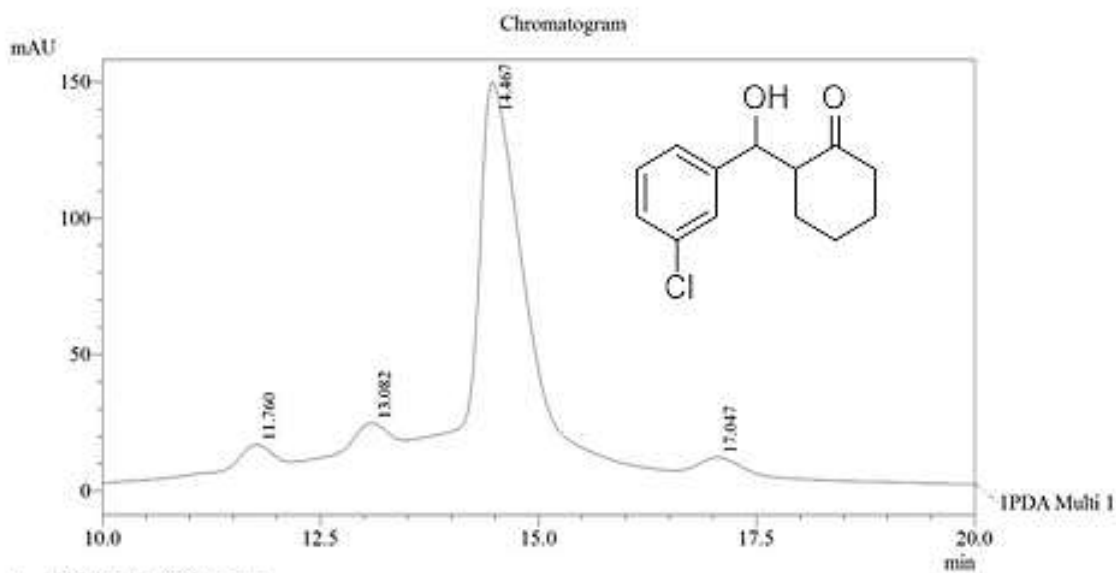

PeakTable

| PDA Ch1 254nm 4nm |           |         |              |       |
|-------------------|-----------|---------|--------------|-------|
| Peak#             | Ret. Time | Area    | Area Percent | Width |
| 1                 | 11.760    | 192030  | 4.012        | 0.631 |
| 2                 | 13.082    | 224280  | 4.686        | 0.647 |
| 3                 | 14.467    | 4192285 | 87.586       | 0.857 |
| 4                 | 17.047    | 177909  | 3.717        | 0.836 |
| Total             |           | 4786505 | 100.000      |       |

**Table 2, Entry 13**

Daicel CHIRALPAK AD-H, hexane/2-propanol = 75:25, flow rate: 1.0 mLmin<sup>-1</sup>, λ = 254 nm

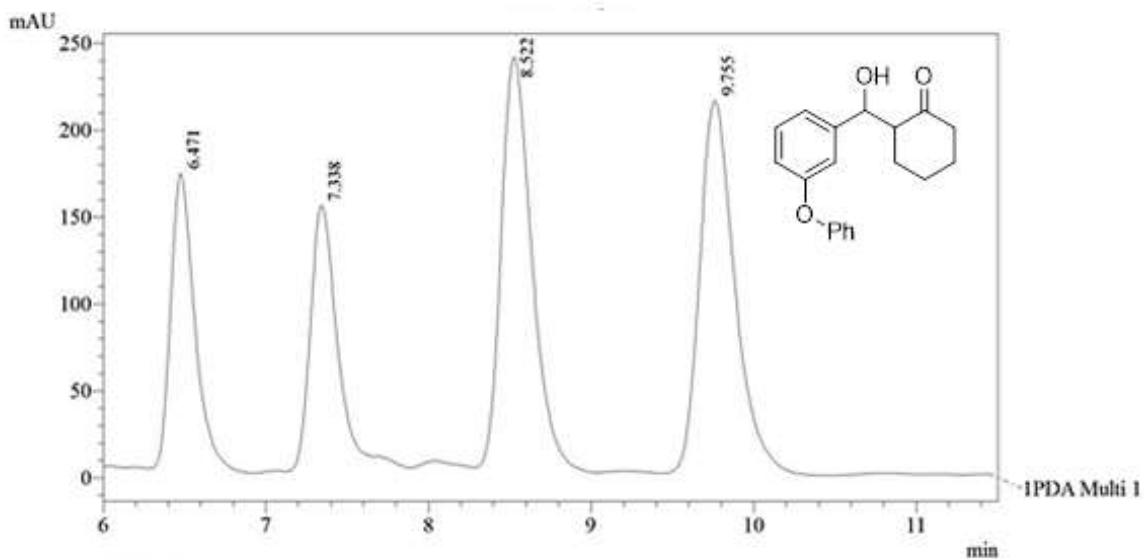

1 PDA Multi 1 / 254nm 4nm

PeakTable

PDA Ch1 254nm 4nm

| Peak# | Ret. Time | Area    | Area Percent | Width |
|-------|-----------|---------|--------------|-------|
| 1     | 6.471     | 1744562 | 17.830       | 0.276 |
| 2     | 7.338     | 1751891 | 17.905       | 0.300 |
| 3     | 8.522     | 3085913 | 31.540       | 0.350 |
| 4     | 9.755     | 3201843 | 32.725       | 0.394 |
| Total |           | 9784209 | 100.000      |       |

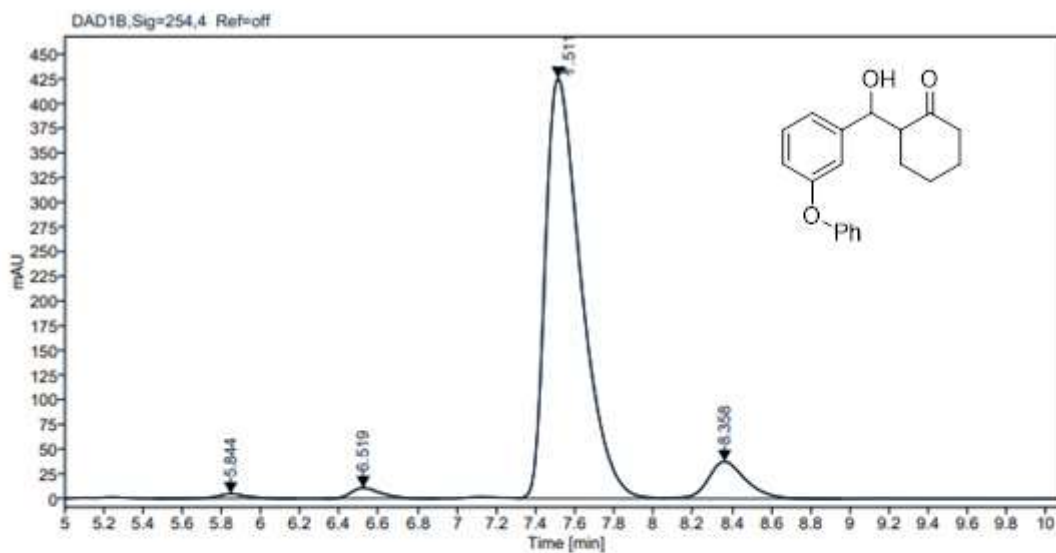

Signal: DAD1B,Sig=254,4 Ref=off

| RT [min] | Type | Width [min] | Area      | Height   | Area%   |
|----------|------|-------------|-----------|----------|---------|
| 5.844    | BB   | 0.7256      | 50.5646   | 4.6855   | 0.8381  |
| 6.519    | BB   | 0.5900      | 112.4000  | 10.6396  | 1.8631  |
| 7.511    | VV   | 0.7503      | 5375.1864 | 425.3457 | 89.0953 |
| 8.358    | VB   | 0.9056      | 494.9254  | 37.3652  | 8.2035  |
|          | Sum  |             | 6033.0764 |          |         |

**Table 2, Entry 14**

Daicel CHIRALPAK IC, hexane/2-propanol = 90:10, flow rate: 1.5 mL min<sup>-1</sup>, λ = 254 nm

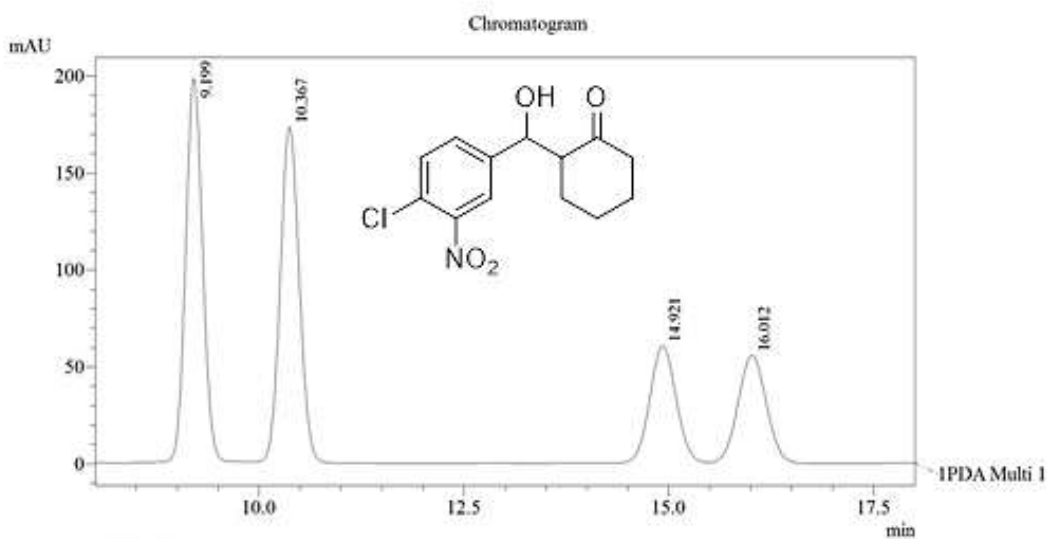

PeakTable

| Peak# | Ret. Time | Area    | Area Percent | Width |
|-------|-----------|---------|--------------|-------|
| 1     | 9.199     | 2798855 | 34.106       | 0.388 |
| 2     | 10.367    | 2771923 | 33.778       | 0.434 |
| 3     | 14.921    | 1323471 | 16.128       | 0.596 |
| 4     | 16.012    | 1312019 | 15.988       | 0.641 |
| Total |           | 8206268 | 100.000      |       |

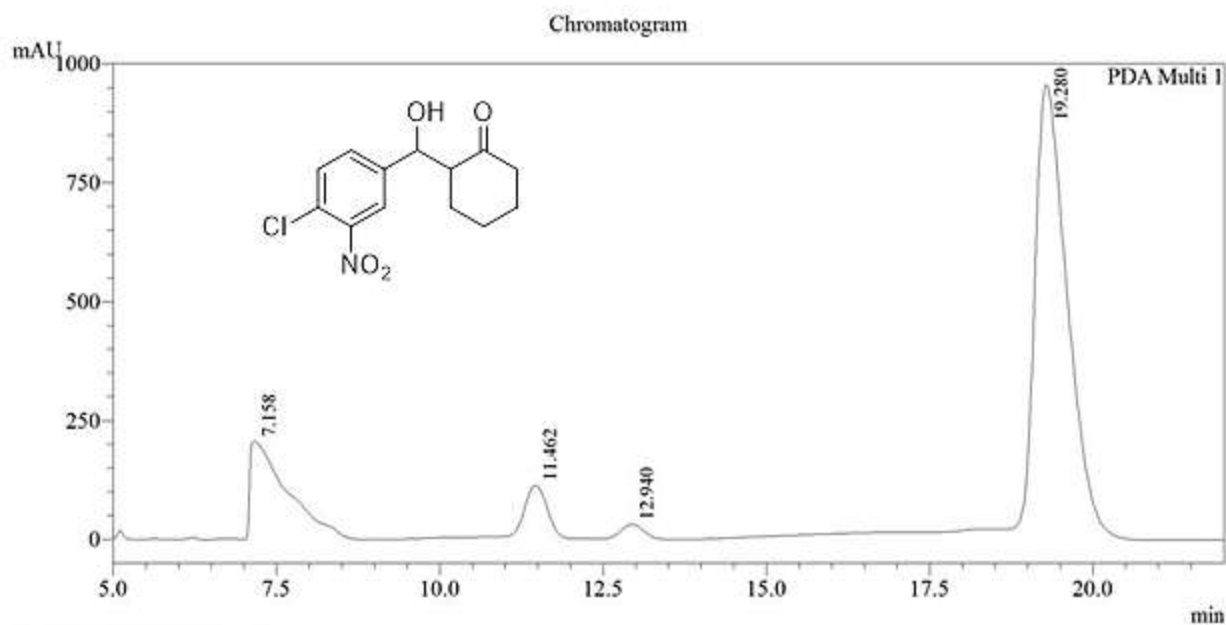

PeakTable

| Peak# | Ret. Time | Area     | Area Percent | Width |
|-------|-----------|----------|--------------|-------|
| 1     | 7.158     | 8084521  | 18.609       | 0.913 |
| 2     | 11.462    | 2582655  | 5.945        | 0.632 |
| 3     | 12.940    | 723696   | 1.666        | 0.642 |
| 4     | 19.280    | 32054124 | 73.781       | 0.914 |
| Total |           | 43444997 | 100.000      |       |

**Table 2, Entry 15**Daicel CHIRALCEL OD-H, hexane/2-propanol = 90:10 flow rate: 0.5 mL min<sup>-1</sup>,  $\lambda = 254$  nm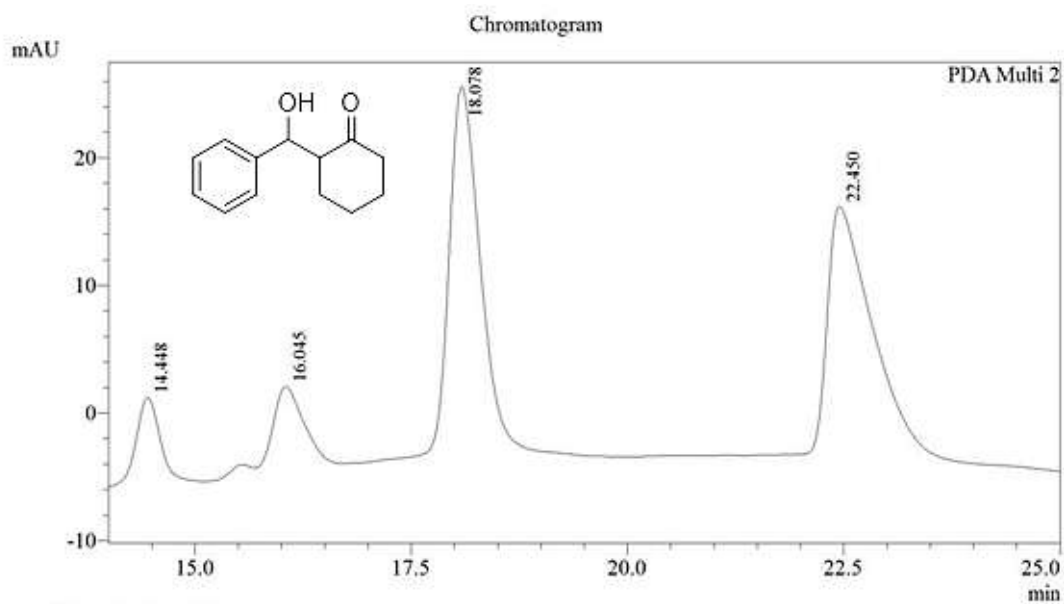

PeakTable

| Peak# | Ret. Time | Area    | Area Percent | Width |
|-------|-----------|---------|--------------|-------|
| 1     | 14.448    | 126256  | 7.544        | 0.492 |
| 2     | 16.045    | 148173  | 8.854        | 0.655 |
| 3     | 18.078    | 705692  | 42.168       | 0.650 |
| 4     | 22.450    | 693391  | 41.433       | 0.972 |
| Total |           | 1673512 | 100.000      |       |

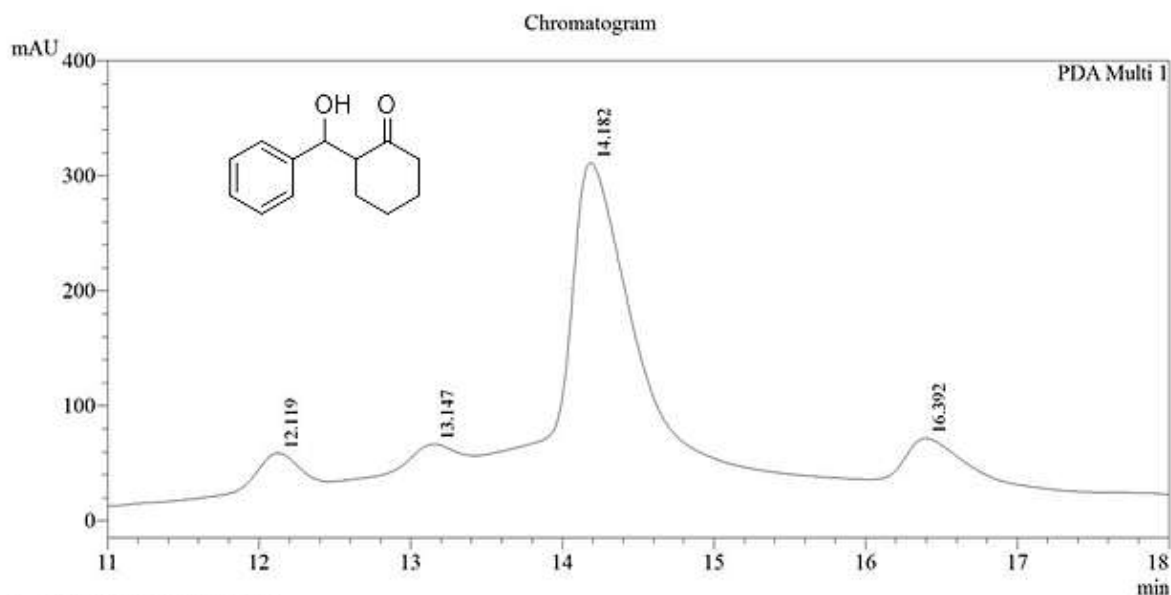

PeakTable

| Peak# | Ret. Time | Area    | Area Percent | Width |
|-------|-----------|---------|--------------|-------|
| 1     | 12.119    | 517570  | 6.346        | 0.480 |
| 2     | 13.147    | 305987  | 3.752        | 0.476 |
| 3     | 14.182    | 6319117 | 77.483       | 0.665 |
| 4     | 16.392    | 1012783 | 12.418       | 0.707 |
| Total |           | 8155456 | 100.000      |       |

**Table 2, Entry 16**

Daicel CHIRALPAK IC, hexane/2-propanol = 90:10, flow rate: 1.5 mL min<sup>-1</sup>, λ = 210 nm

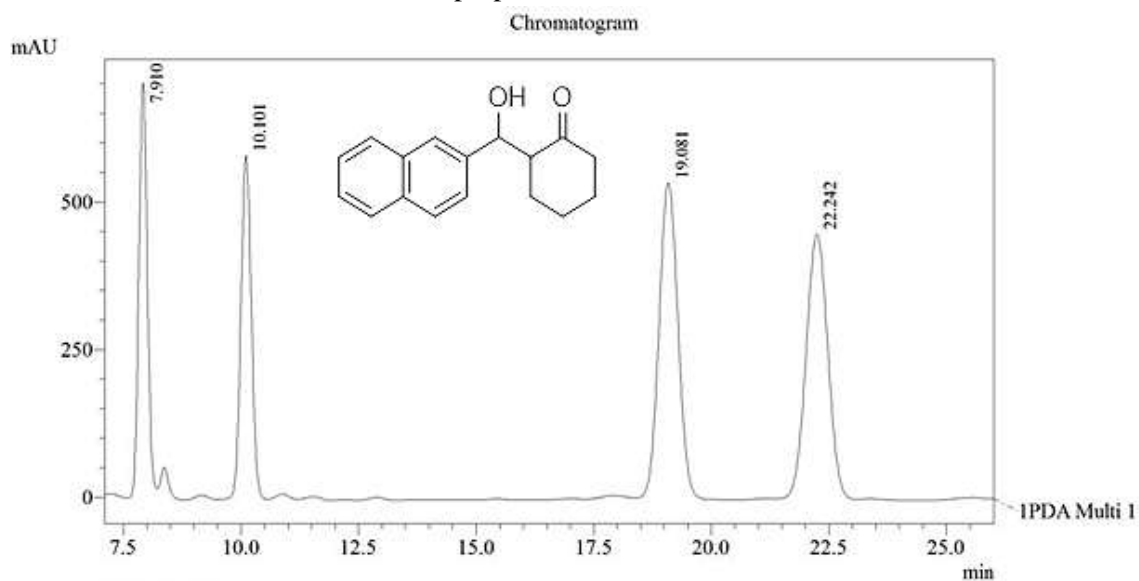

1 PDA Multi 1 / 210nm 4nm

PeakTable

| Peak# | Ret. Time | Area     | Area Percent | Width |
|-------|-----------|----------|--------------|-------|
| 1     | 7.910     | 8451452  | 18.114       | 0.338 |
| 2     | 10.101    | 8936311  | 19.154       | 0.417 |
| 3     | 19.081    | 14914742 | 31.967       | 0.747 |
| 4     | 22.242    | 14353629 | 30.765       | 0.860 |
| Total |           | 46656133 | 100.000      |       |

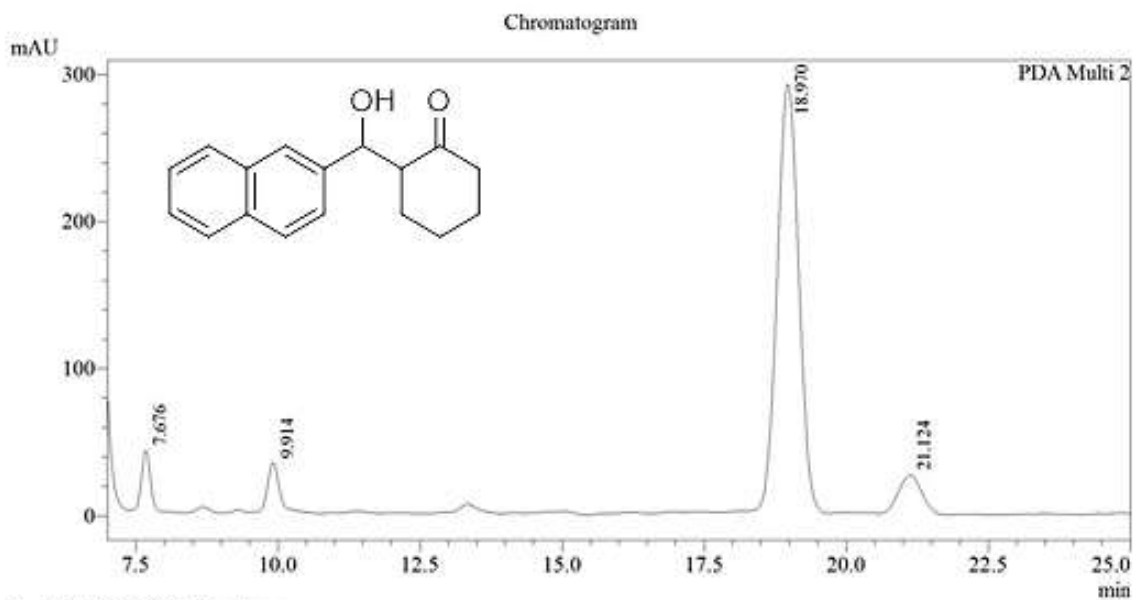

1 PDA Multi 2 / 210nm 4nm

PeakTable

| Peak# | Ret. Time | Area    | Area Percent | Width |
|-------|-----------|---------|--------------|-------|
| 1     | 7.676     | 424441  | 4.632        | 0.288 |
| 2     | 9.914     | 445863  | 4.865        | 0.360 |
| 3     | 18.970    | 7565160 | 82.554       | 0.696 |
| 4     | 21.124    | 728383  | 7.948        | 0.752 |
| Total |           | 9163846 | 100.000      |       |

**Table 2, Entry 17**

Daicel CHIRALPAK AD-H, hexane/2-propanol = 95:5, flow rate: 1.0 mLmin<sup>-1</sup>, λ = 254 nm

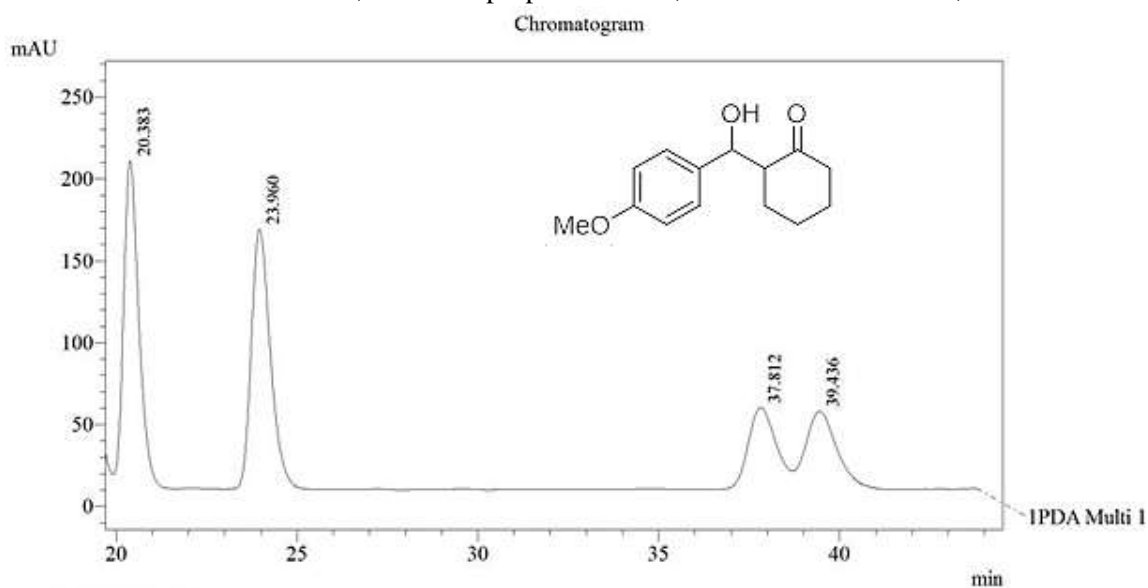

1 PDA Multi 1 / 220nm 4nm

PeakTable

PDA Ch1 220nm 4nm

| Peak# | Ret. Time | Area     | Area Percent | Width |
|-------|-----------|----------|--------------|-------|
| 1     | 20.383    | 5501233  | 32.843       | 0.750 |
| 2     | 23.960    | 5713379  | 34.109       | 0.952 |
| 3     | 37.812    | 2685768  | 16.034       | 1.451 |
| 4     | 39.436    | 2849855  | 17.014       | 1.581 |
| Total |           | 16750236 | 100.000      |       |

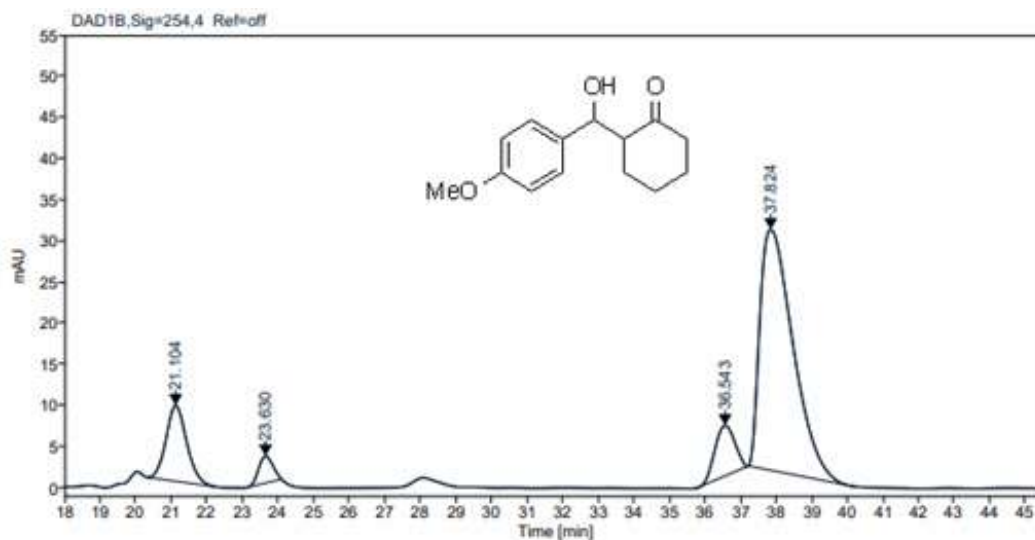

Signal: DAD1B,Sig=254,4 Ref=off

| RT [min] | Type | Width [min] | Area      | Height  | Area%   |
|----------|------|-------------|-----------|---------|---------|
| 21.104   | BB   | 1.9200      | 372.0884  | 9.2050  | 14.3374 |
| 23.630   | MM m | 0.4321      | 91.0437   | 3.2773  | 3.5081  |
| 36.543   | MM m | 0.6010      | 238.2309  | 6.1091  | 9.1796  |
| 37.824   | MM m | 0.9632      | 1893.8695 | 29.2584 | 72.9749 |
| Sum      |      |             | 2595.2326 |         |         |



**Table 3, Entry 1**

Daicel CHIRALPAK AD-H, hexane/2-propanol = 95:5, flow rate: 0.5 mL min<sup>-1</sup>, λ = 254 nm

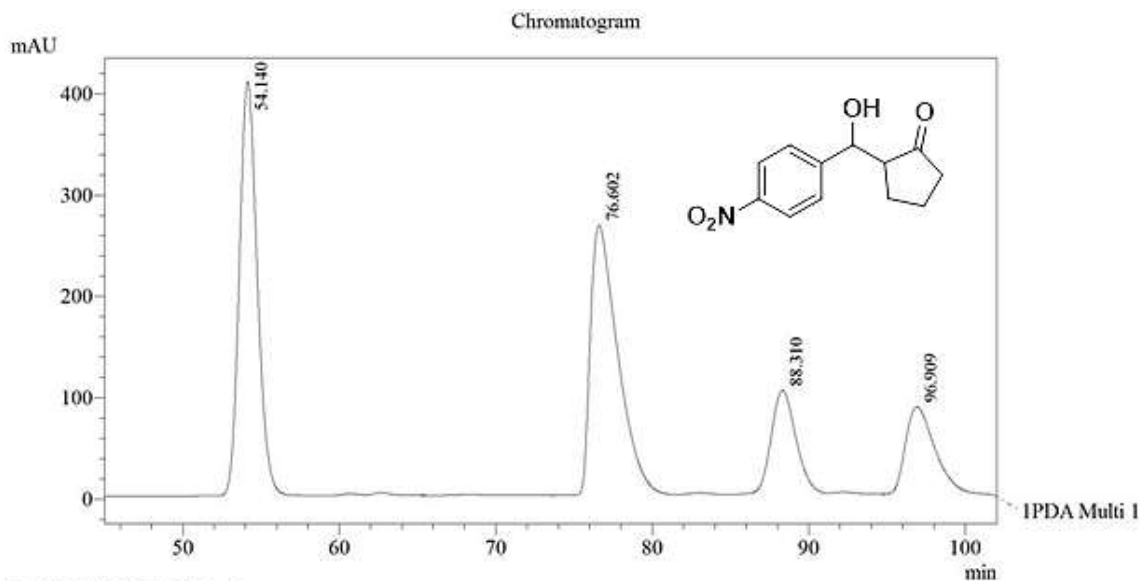

1 PDA Multi 1 / 254nm 4nm

PeakTable

PDA Ch1 254nm 4nm

| Peak# | Ret. Time | Area     | Area Percent | Width |
|-------|-----------|----------|--------------|-------|
| 1     | 54.140    | 32300458 | 37.372       | 2.088 |
| 2     | 76.602    | 32228981 | 37.289       | 3.288 |
| 3     | 88.310    | 10825106 | 12.525       | 2.870 |
| 4     | 96.909    | 11076105 | 12.815       | 3.404 |
| Total |           | 86430649 | 100.000      |       |

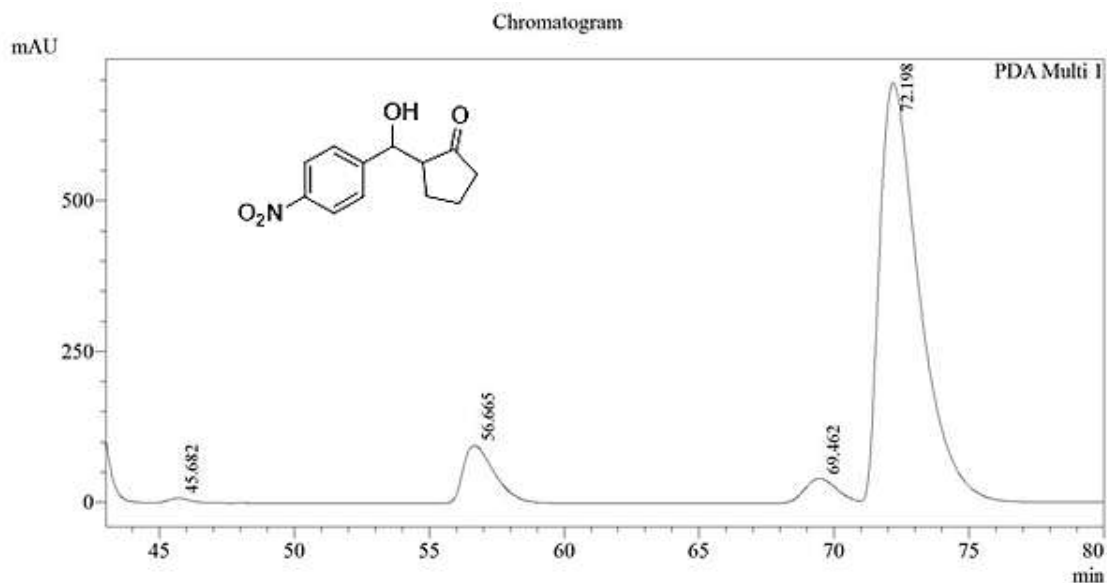

1 PDA Multi 1 / 254nm 4nm

PeakTable

PDA Ch1 254nm 4nm

| Peak# | Ret. Time | Area     | Area Percent | Width |
|-------|-----------|----------|--------------|-------|
| 1     | 45.682    | 412275   | 0.503        | 1.427 |
| 2     | 56.665    | 7643185  | 9.322        | 2.099 |
| 3     | 69.462    | 3104543  | 3.787        | 2.158 |
| 4     | 72.198    | 70829020 | 86.388       | 2.599 |
| Total |           | 81989022 | 100.000      |       |

**Table 3, Entry 2**

Daicel CHIRALPAK IC, hexane/2-propanol = 92.5:7.5, flow rate: 0.8 mL min<sup>-1</sup>, λ = 254 nm

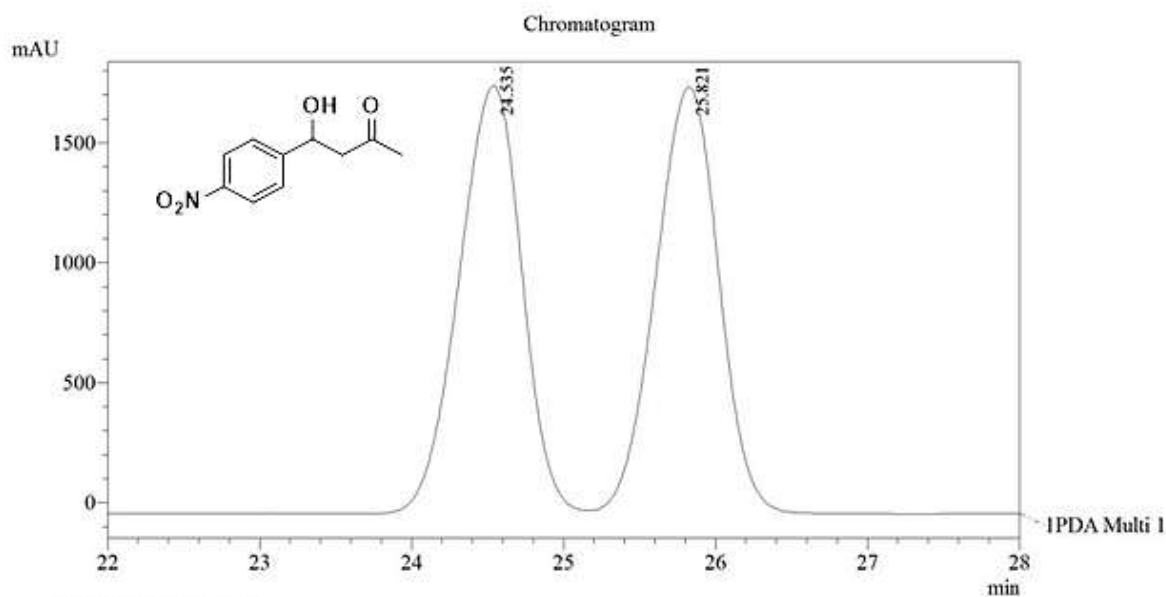

PeakTable

PDA Ch1 254nm 4nm

| Peak# | Ret. Time | Area      | Area Percent | Width |
|-------|-----------|-----------|--------------|-------|
| 1     | 24.535    | 50688232  | 49.993       | 0.766 |
| 2     | 25.821    | 50701588  | 50.007       | 0.767 |
| Total |           | 101389820 | 100.000      |       |

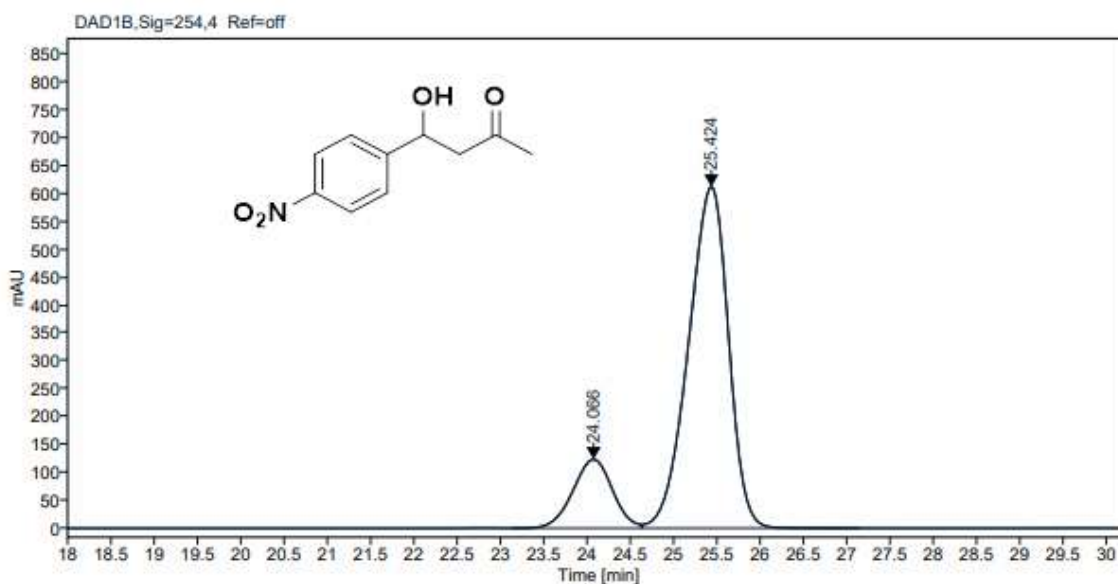

Signal: DAD1B, Sig=254,4 Ref=off

| RT [min] | Type | Width [min] | Area       | Height   | Area%   |
|----------|------|-------------|------------|----------|---------|
| 24.066   | BV   | 1.4951      | 3919.0046  | 123.4714 | 16.6043 |
| 25.424   | VB   | 2.5049      | 19683.2861 | 613.4050 | 83.3957 |
| Sum      |      |             | 23602.2907 |          |         |

**Table 4, Entry 1**Daicel CHIRALPAK IC, hexane/2-propanol = 80:20, flow rate: 1.0 mL min<sup>-1</sup>,  $\lambda = 254$  nm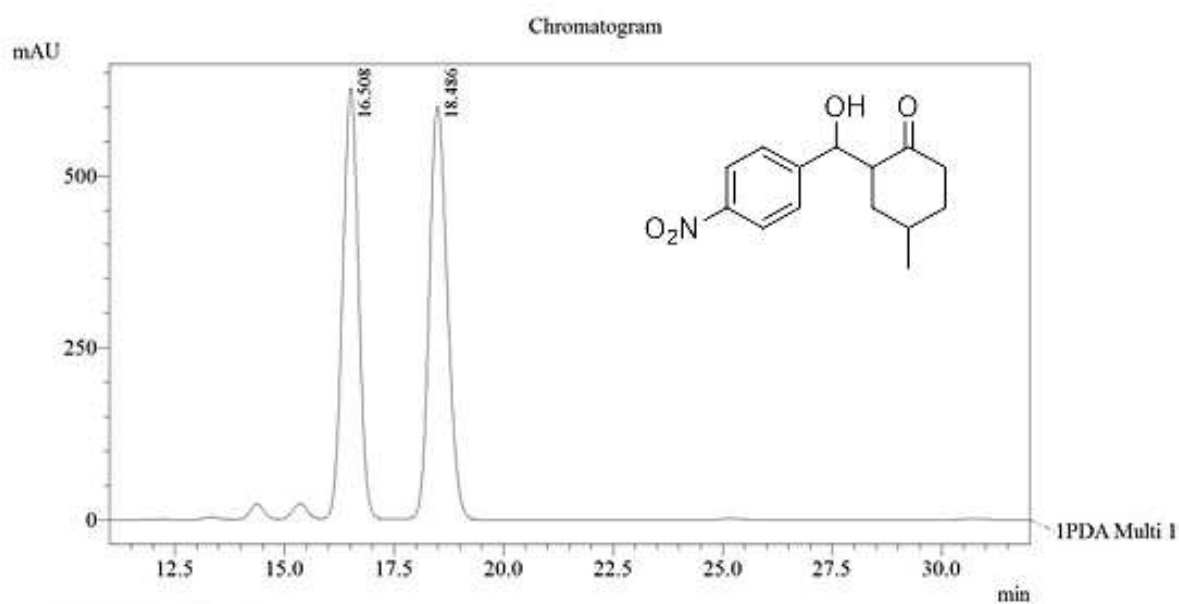

PeakTable

PDA Ch1 254nm 4nm

| Peak# | Ret. Time | Area     | Area Percent | Width |
|-------|-----------|----------|--------------|-------|
| 1     | 16.508    | 15637465 | 47.728       | 0.670 |
| 2     | 18.486    | 17126070 | 52.272       | 0.764 |
| Total |           | 32763535 | 100.000      |       |

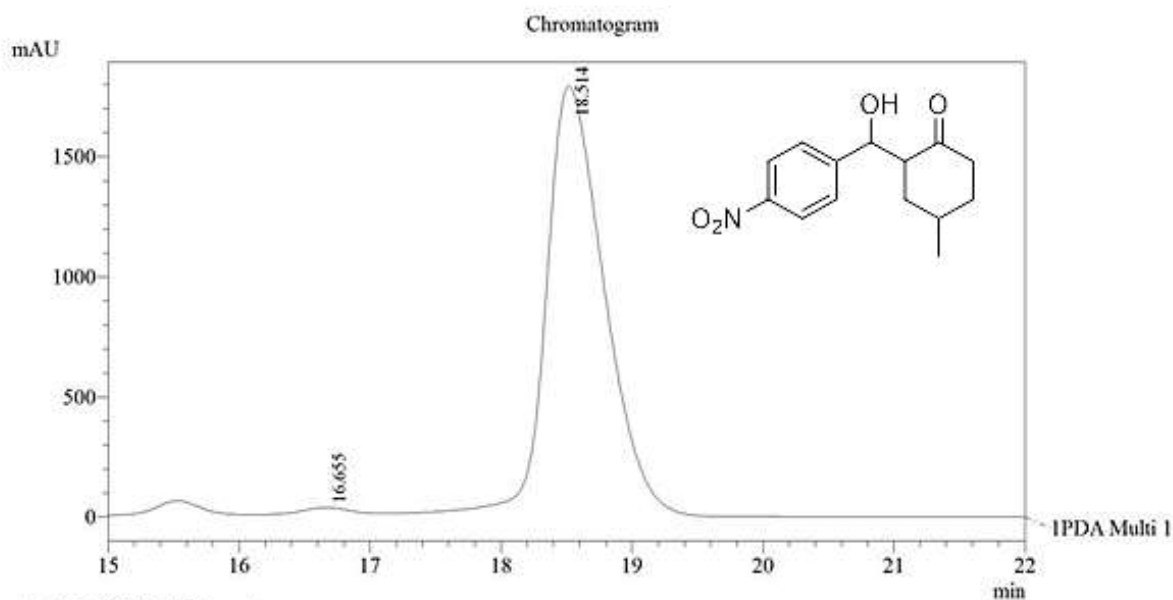

PeakTable

PDA Ch1 254nm 4nm

| Peak# | Ret. Time | Area     | Area Percent | Width |
|-------|-----------|----------|--------------|-------|
| 1     | 16.655    | 564069   | 1.034        | 0.606 |
| 2     | 18.514    | 53993716 | 98.966       | 0.797 |
| Total |           | 54557785 | 100.000      |       |

**Table 4, Entry 2**Daicel CHIRALPAK IC, hexane/2-propanol = 80:20, flow rate: 1.0 mL min<sup>-1</sup>,  $\lambda = 220$  nm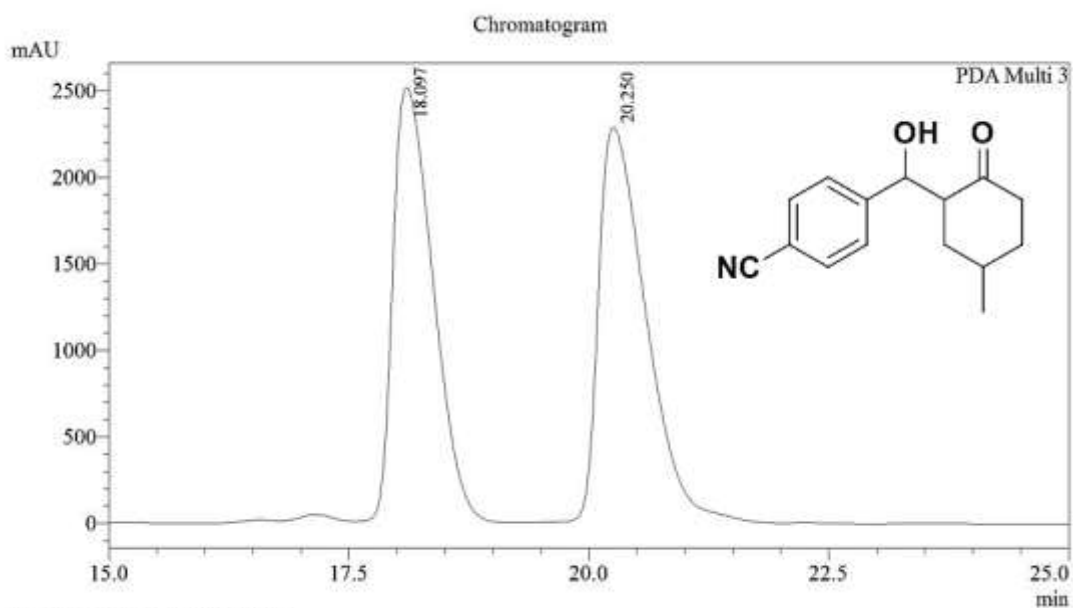

1 PDA Multi 3 / 220nm 4nm

PeakTable

PDA Ch3 220nm 4nm

| Peak# | Ret. Time | Area      | Area Percent | Width |
|-------|-----------|-----------|--------------|-------|
| 1     | 18.097    | 72261841  | 48.429       | 0.769 |
| 2     | 20.250    | 76950809  | 51.571       | 0.894 |
| Total |           | 149212651 | 100.000      |       |

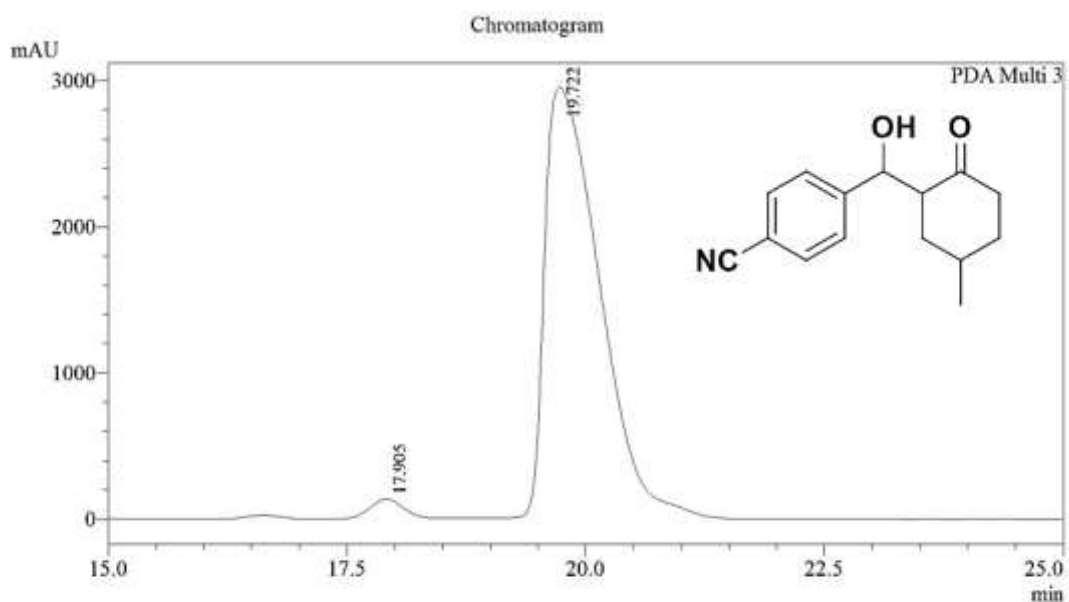

1 PDA Multi 3 / 220nm 4nm

PeakTable

PDA Ch3 220nm 4nm

| Peak# | Ret. Time | Area      | Area Percent | Width |
|-------|-----------|-----------|--------------|-------|
| 1     | 17.905    | 3142169   | 2.606        | 0.636 |
| 2     | 19.722    | 117443105 | 97.394       | 1.030 |
| Total |           | 120585274 | 100.000      |       |

**Table 4, Entry 3**

Daicel CHIRALPAK IC, hexane/2-propanol = 80:20, flow rate: 0.5 mL min<sup>-1</sup>, λ = 254 nm

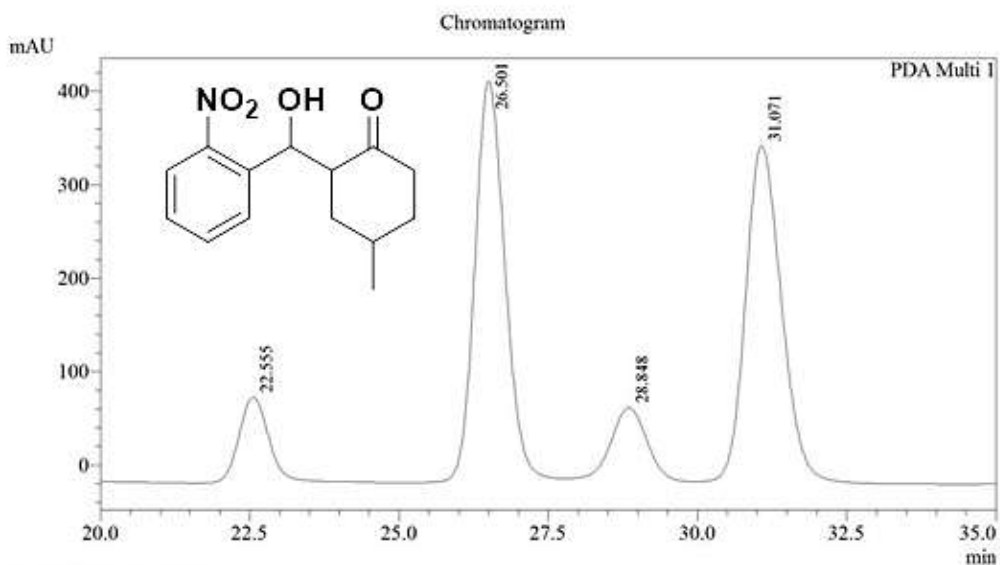

1 PDA Multi 1 / 254nm 4nm

PeakTable

| Peak# | Ret. Time | Area     | Area Percent | Width |
|-------|-----------|----------|--------------|-------|
| 1     | 22.555    | 2972732  | 8.406        | 0.880 |
| 2     | 26.501    | 14657506 | 41.446       | 0.914 |
| 3     | 28.848    | 3075512  | 8.696        | 1.076 |
| 4     | 31.071    | 14659424 | 41.452       | 1.089 |
| Total |           | 35365174 | 100.000      |       |

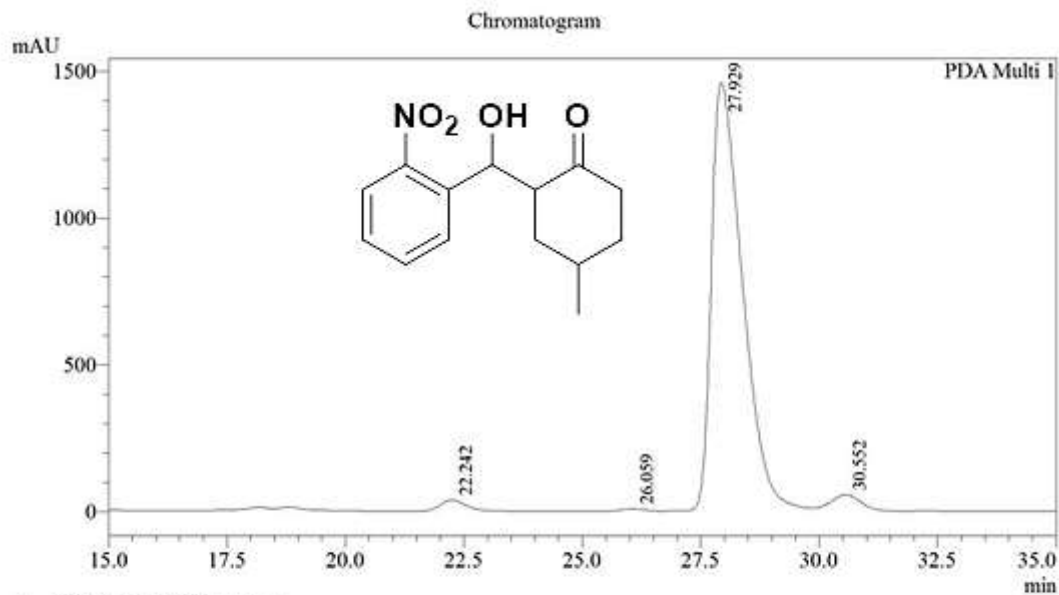

1 PDA Multi 1 / 254nm 4nm

PeakTable

| Peak# | Ret. Time | Area     | Area Percent | Width |
|-------|-----------|----------|--------------|-------|
| 1     | 22.242    | 1345227  | 1.944        | 0.951 |
| 2     | 26.059    | 237373   | 0.343        | 0.839 |
| 3     | 27.929    | 65766784 | 95.048       | 1.217 |
| 4     | 30.552    | 1843920  | 2.665        | 1.051 |
| Total |           | 69193304 | 100.000      |       |

<sup>1</sup>H NMR spectra of the crude reaction mixtures (for determination of the diastereomeric ratio)

Table 1, Entry 7

ES-PTAP-CAT-9; 1H; CDCl3; 8 MAR 18

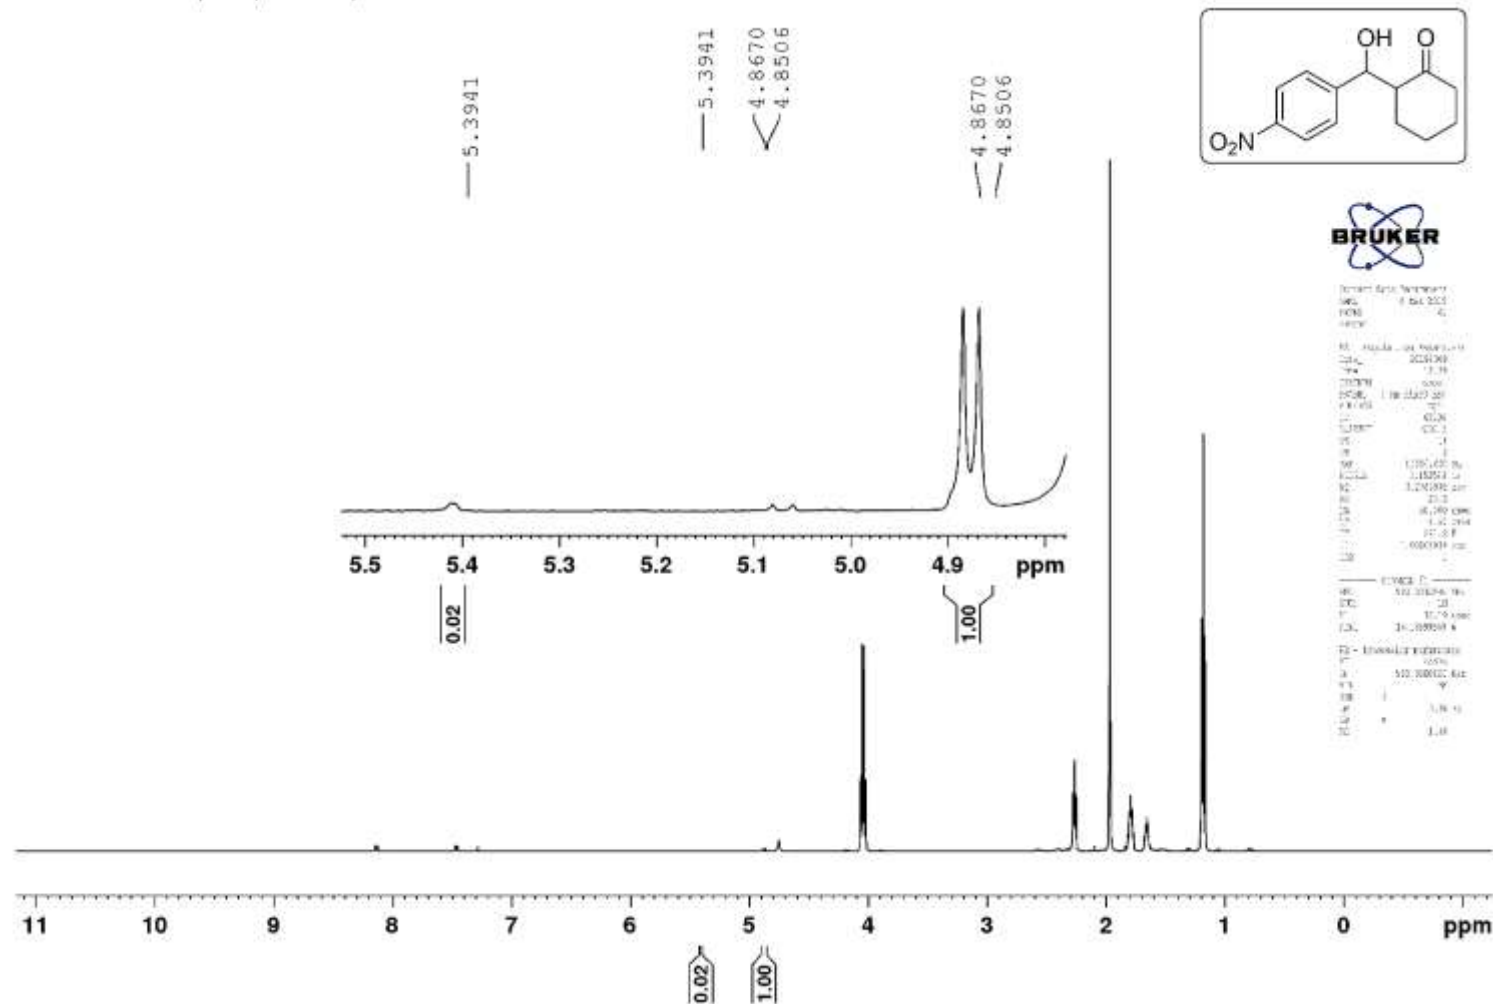

Table 2, Entry 1

ES-KK-PTAP-4CN; 1H; CDCl3; 04/04/2018

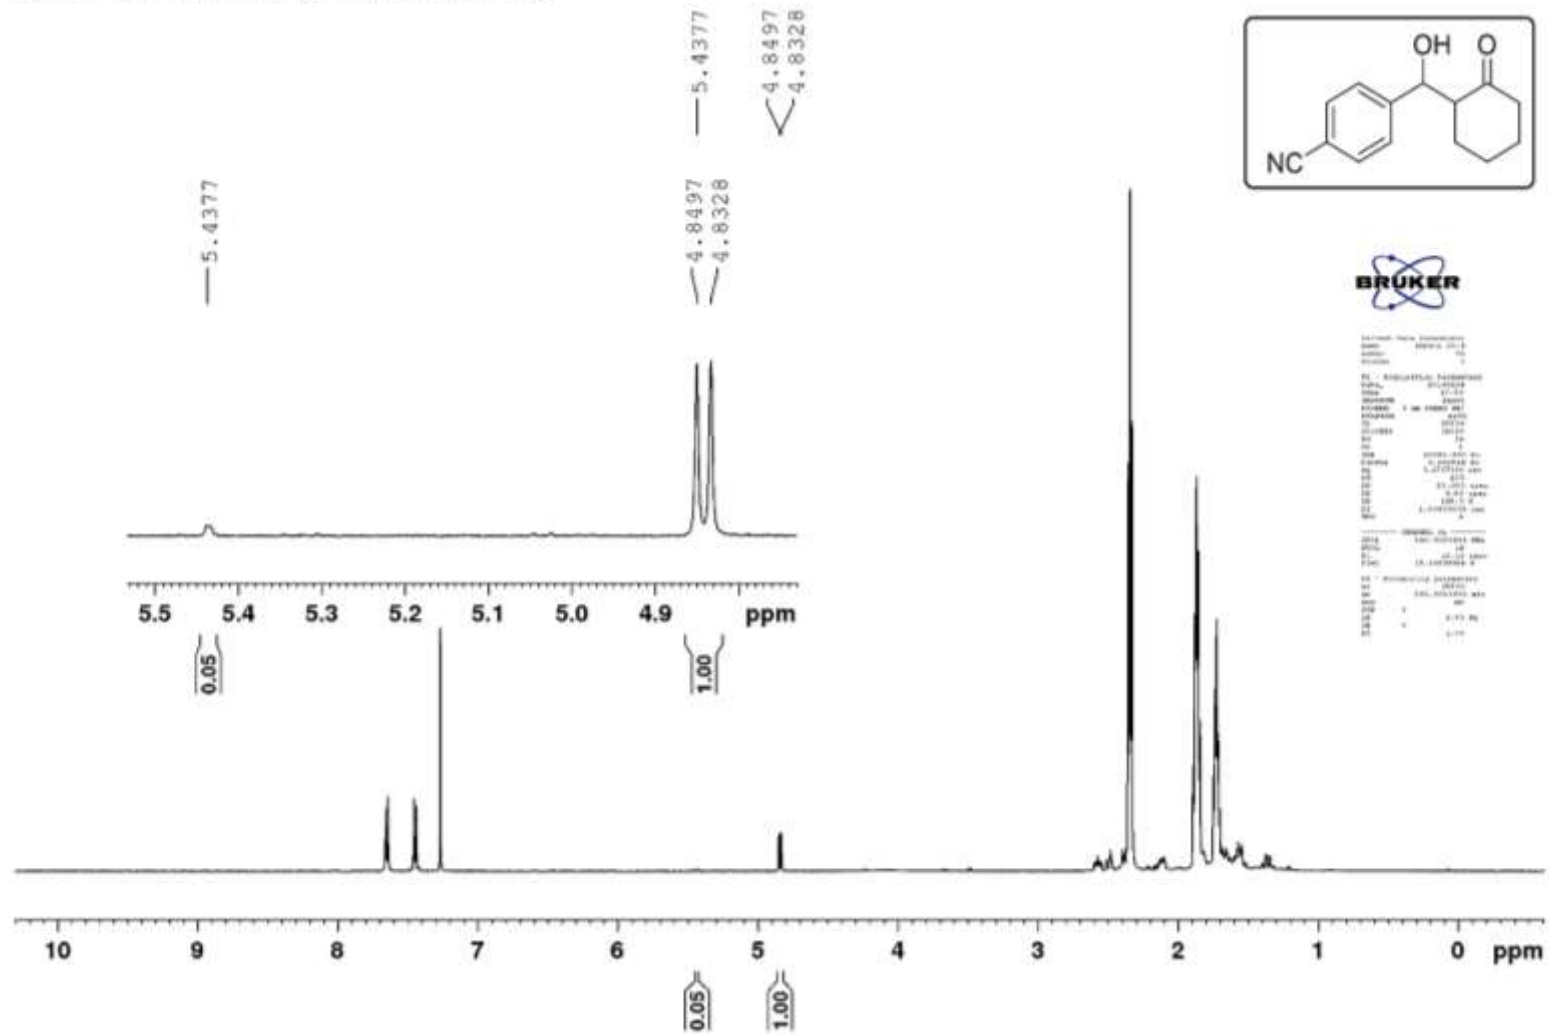









Table 2, Entry 5

ES-KK-PTAP-COOMe; 1H; CDCl3, 10/04/18

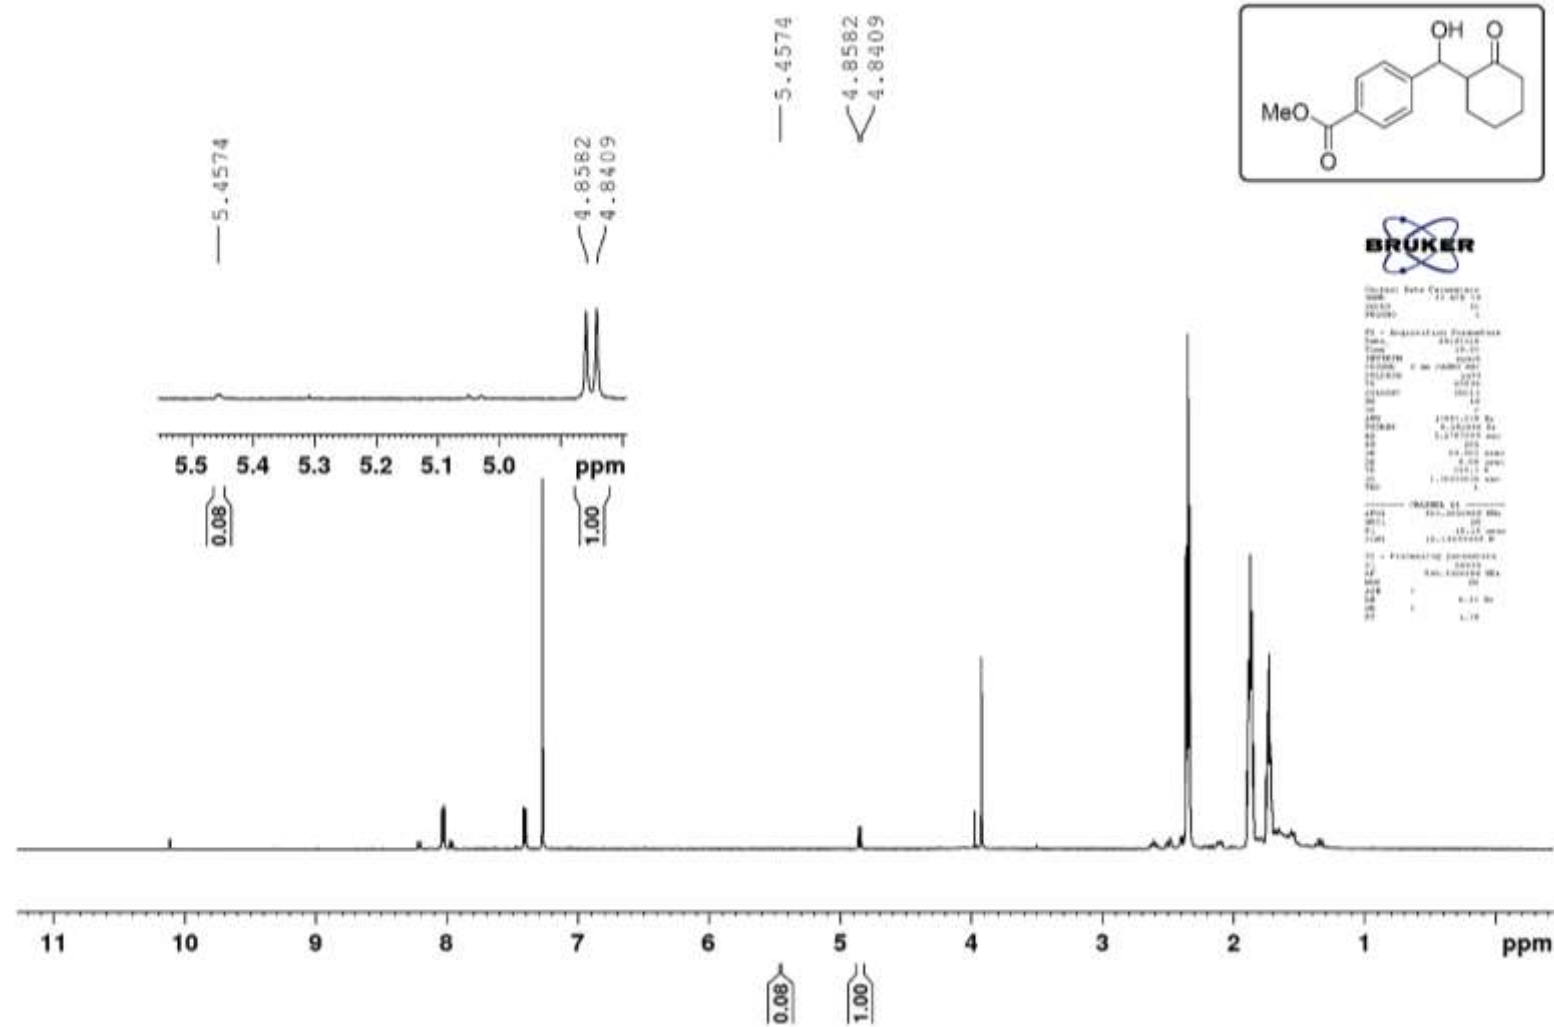

Table 2, Entry 6

ES-KK-PTAP-3PY; 27/03/2018

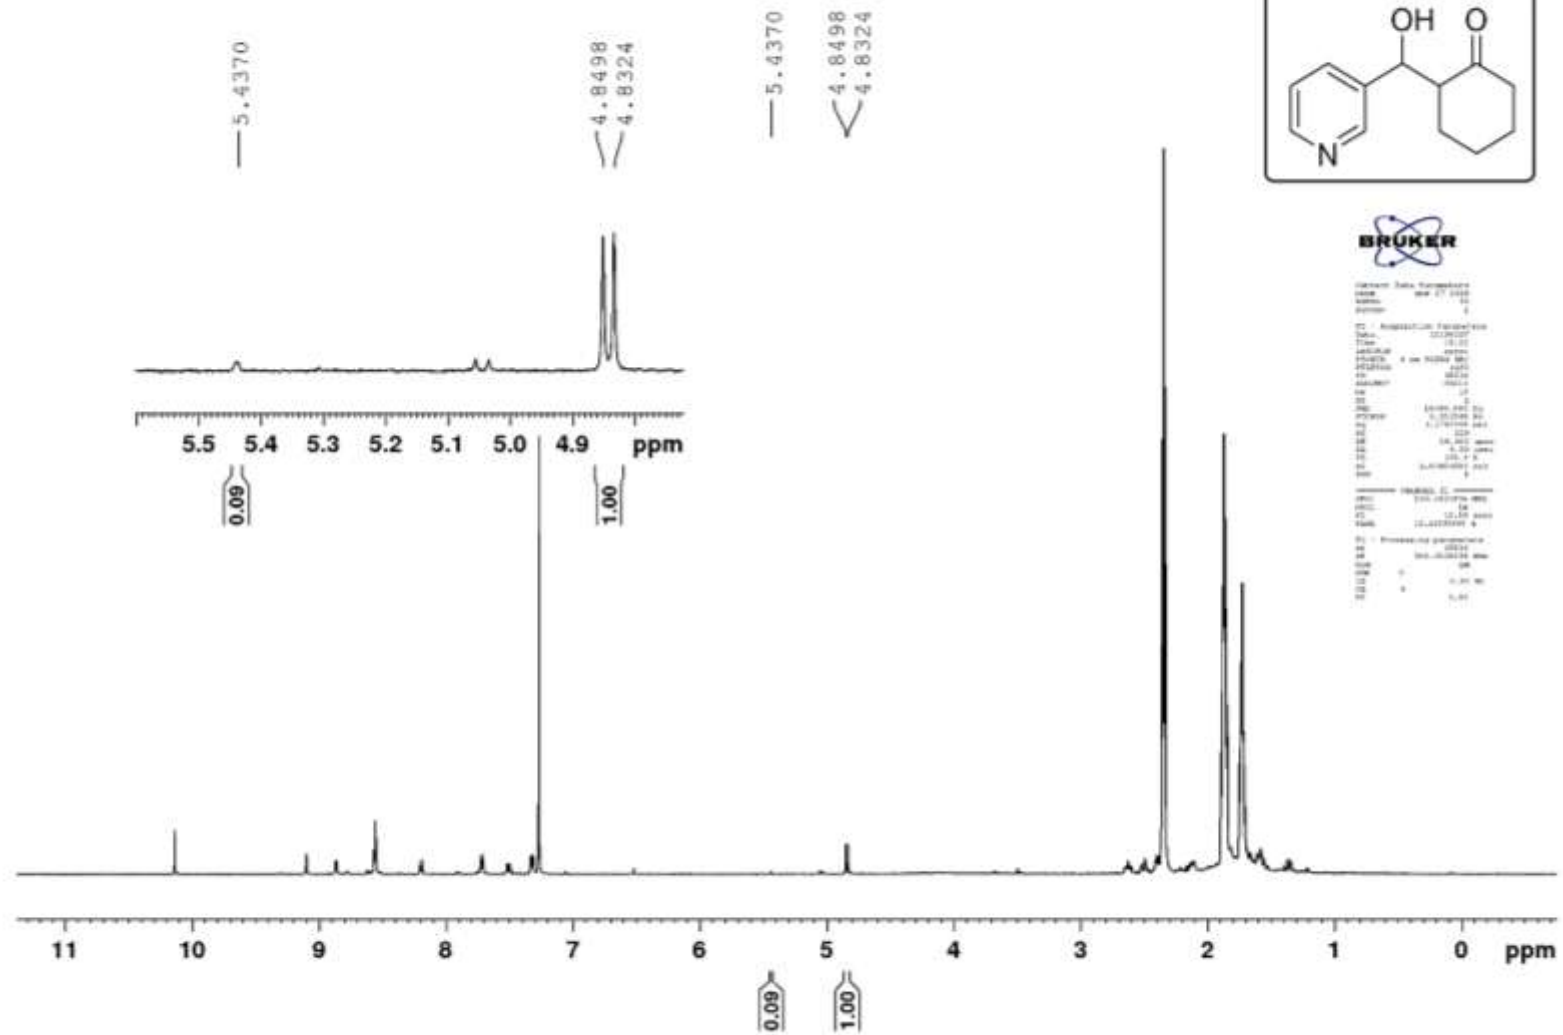

Table 2, Entry 7

ES-KK-PTAP-4PY; 1H; CRUDE; 31 MAR 18

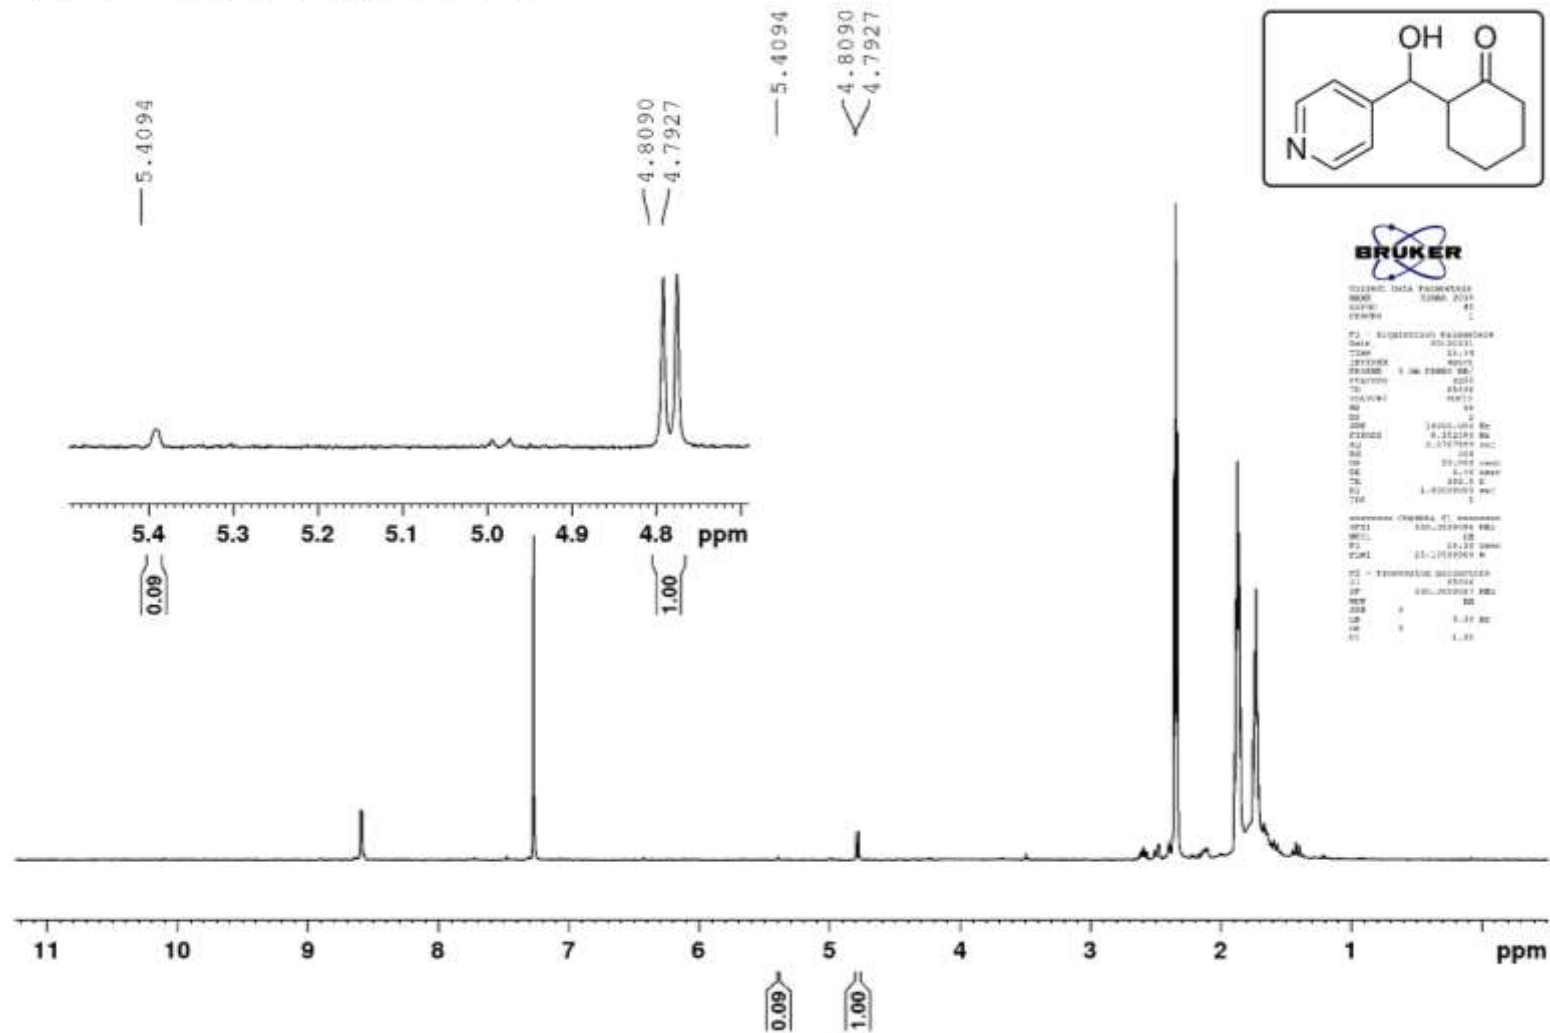



Table 2, Entry 9

ES-KK-PTAP-2NO2-1H; CRUDE; 2 April 2018

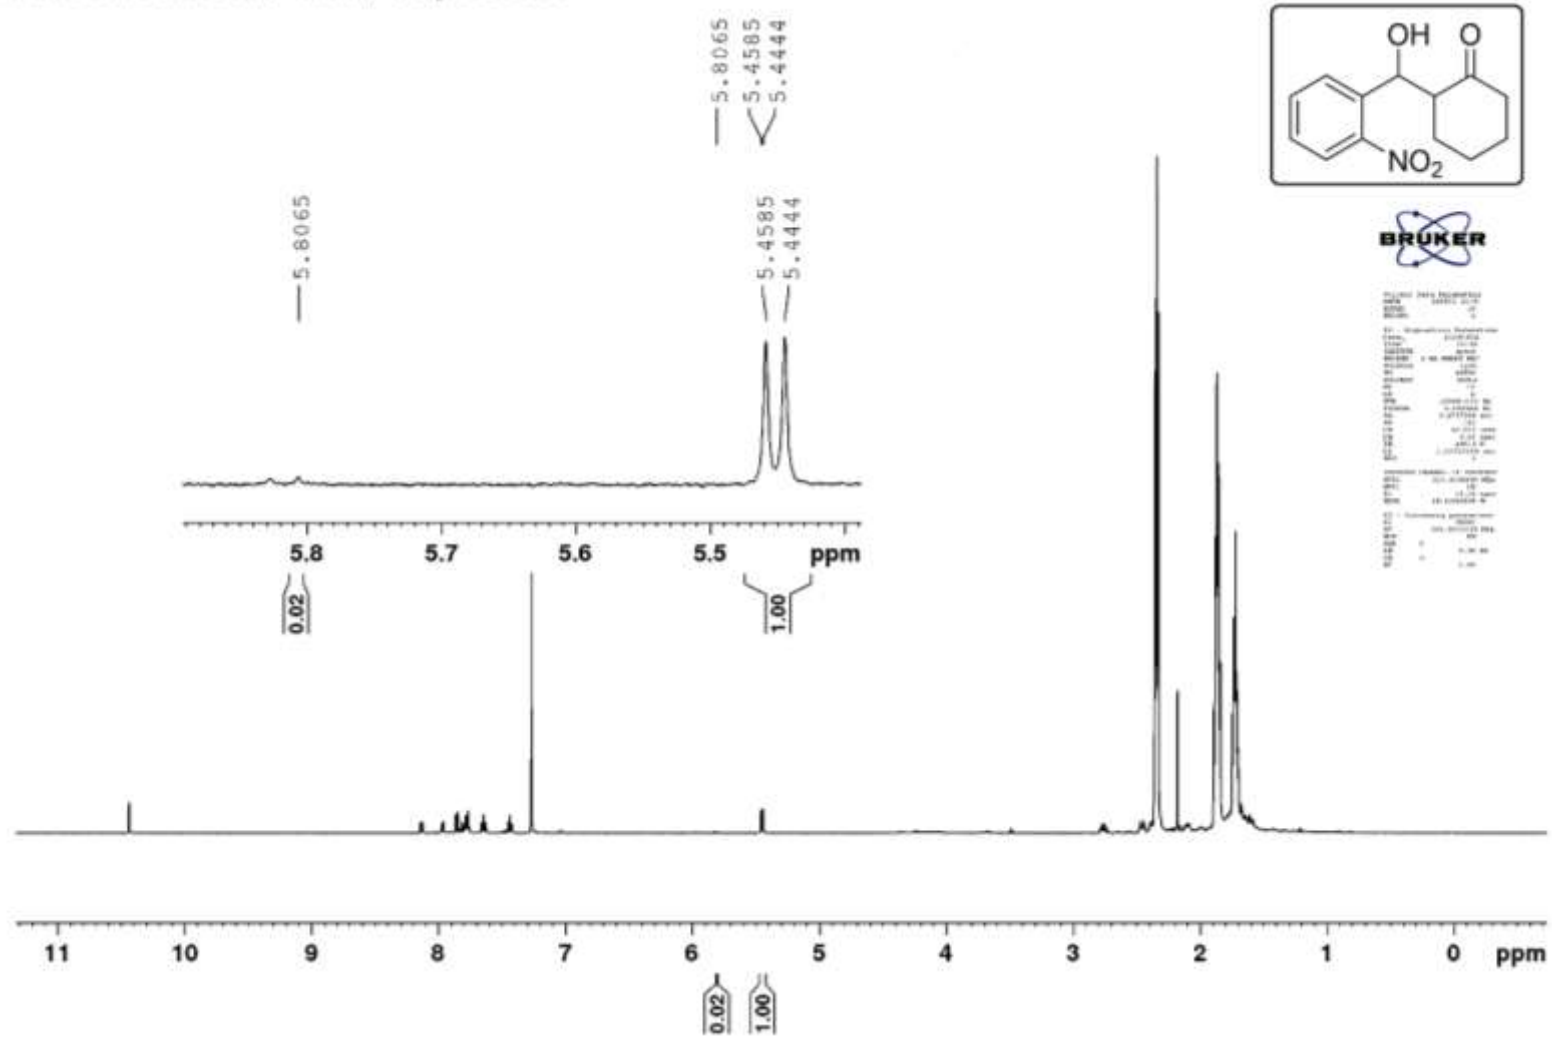

Table 2, Entry 10

ES-KK-PTAP-2Cl-(1H-CDCl3),  
07-04-2018

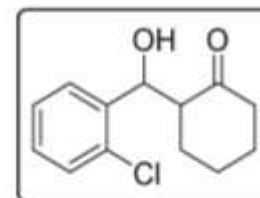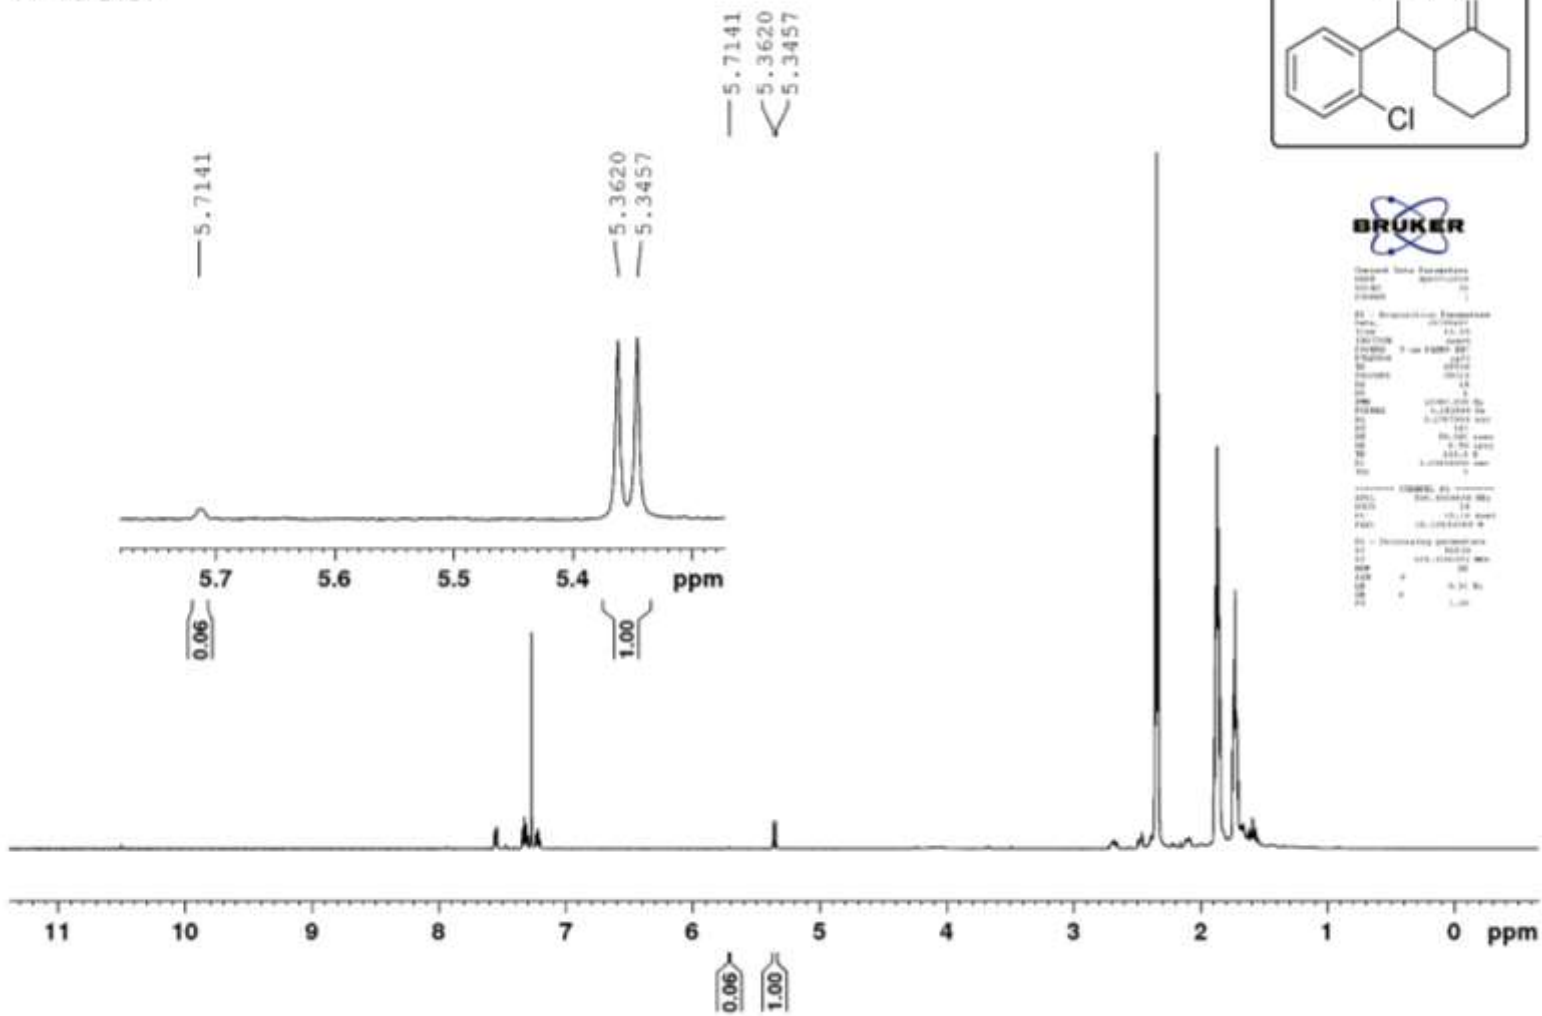



Table 2, Entry 11

ES-KK-3-NO<sub>2</sub>-crude

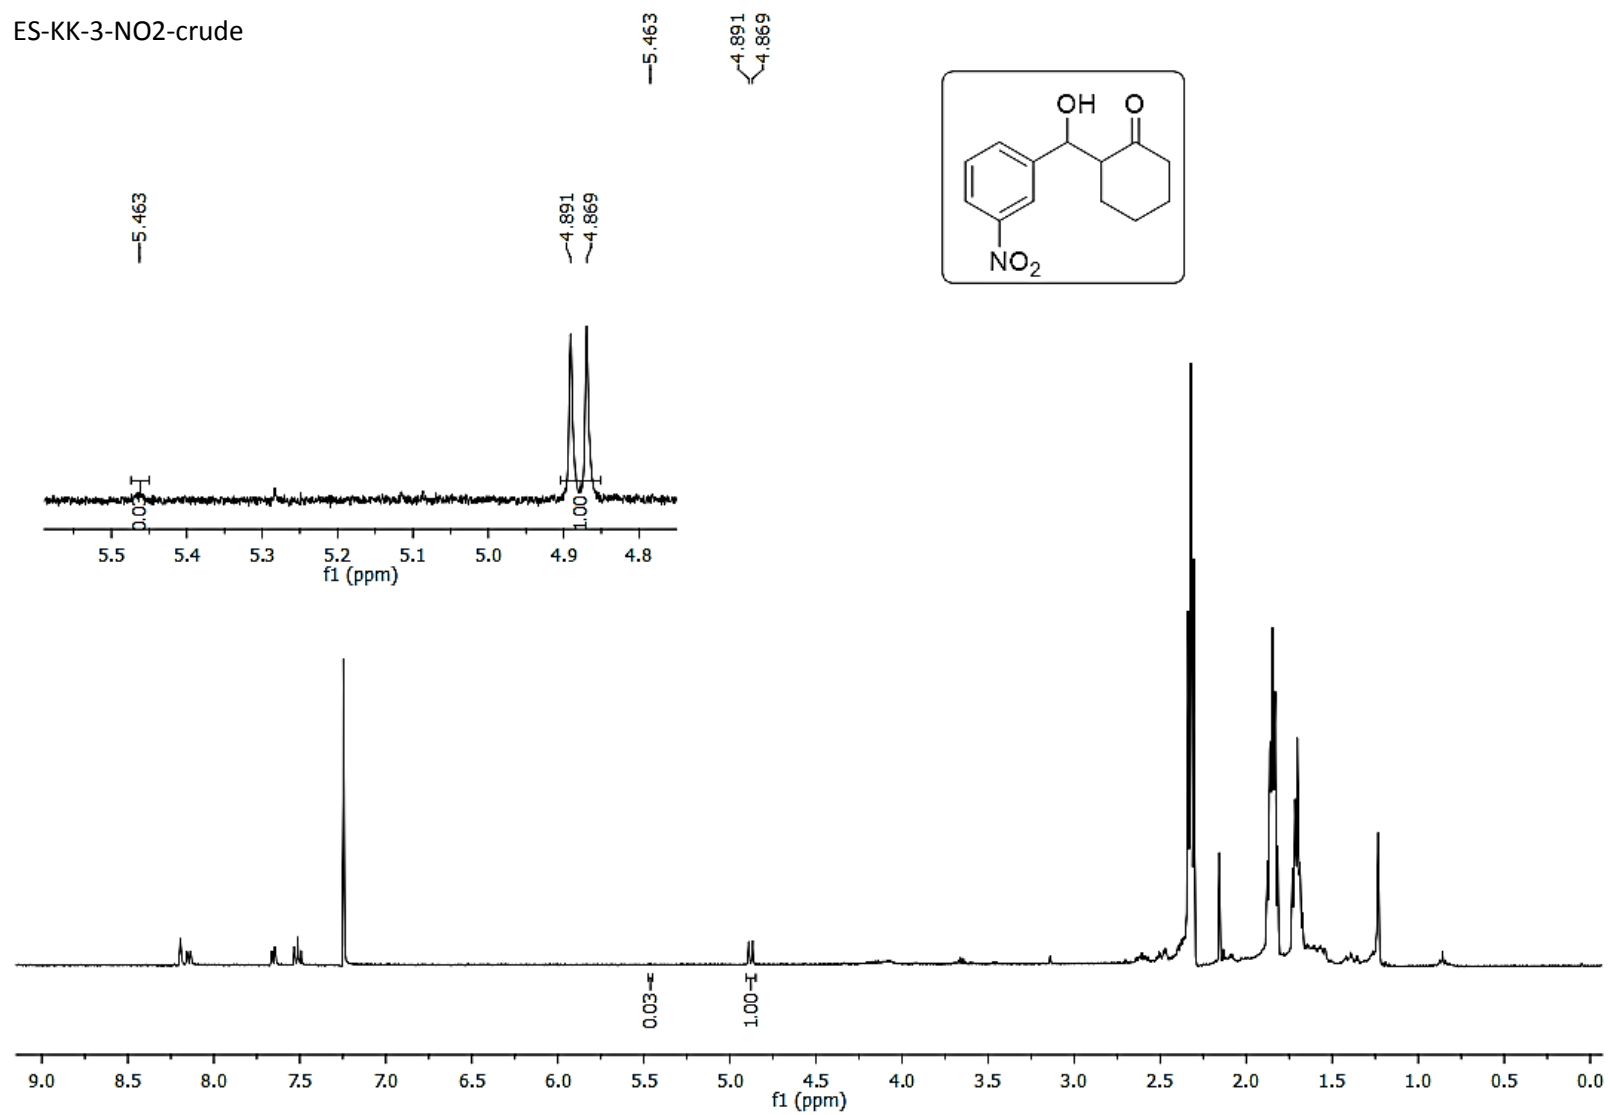

Table 2, Entry 12

ES-KK-PTAP-3CL

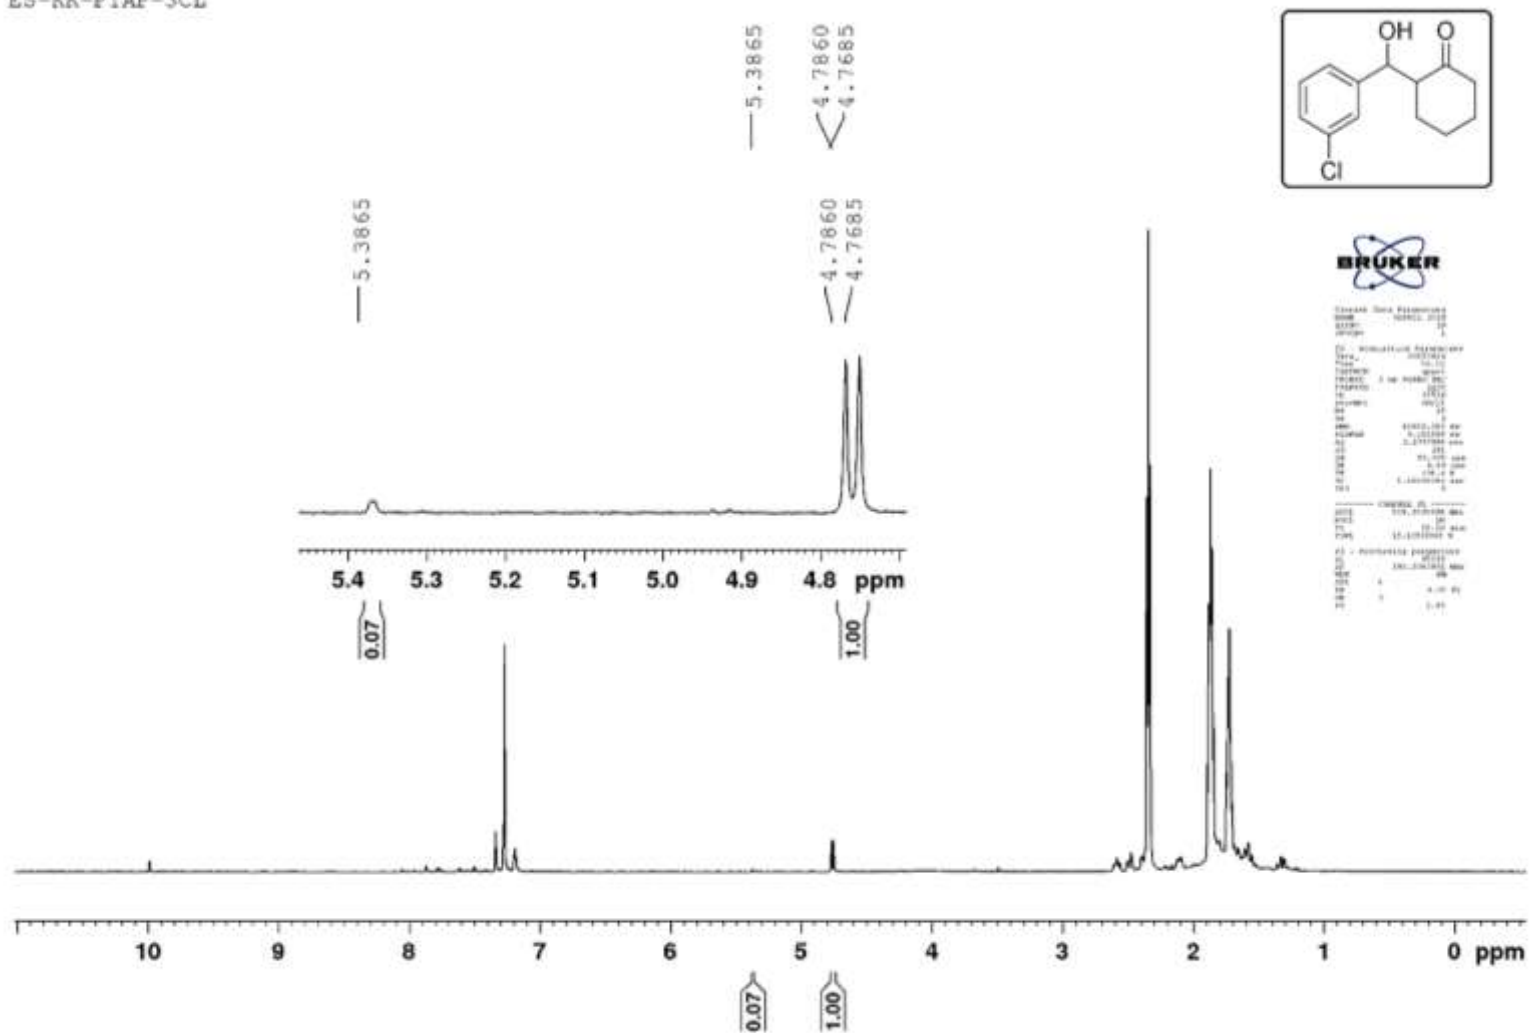

Table 2, Entry 13

ES-KK-3-OC6H5-crude

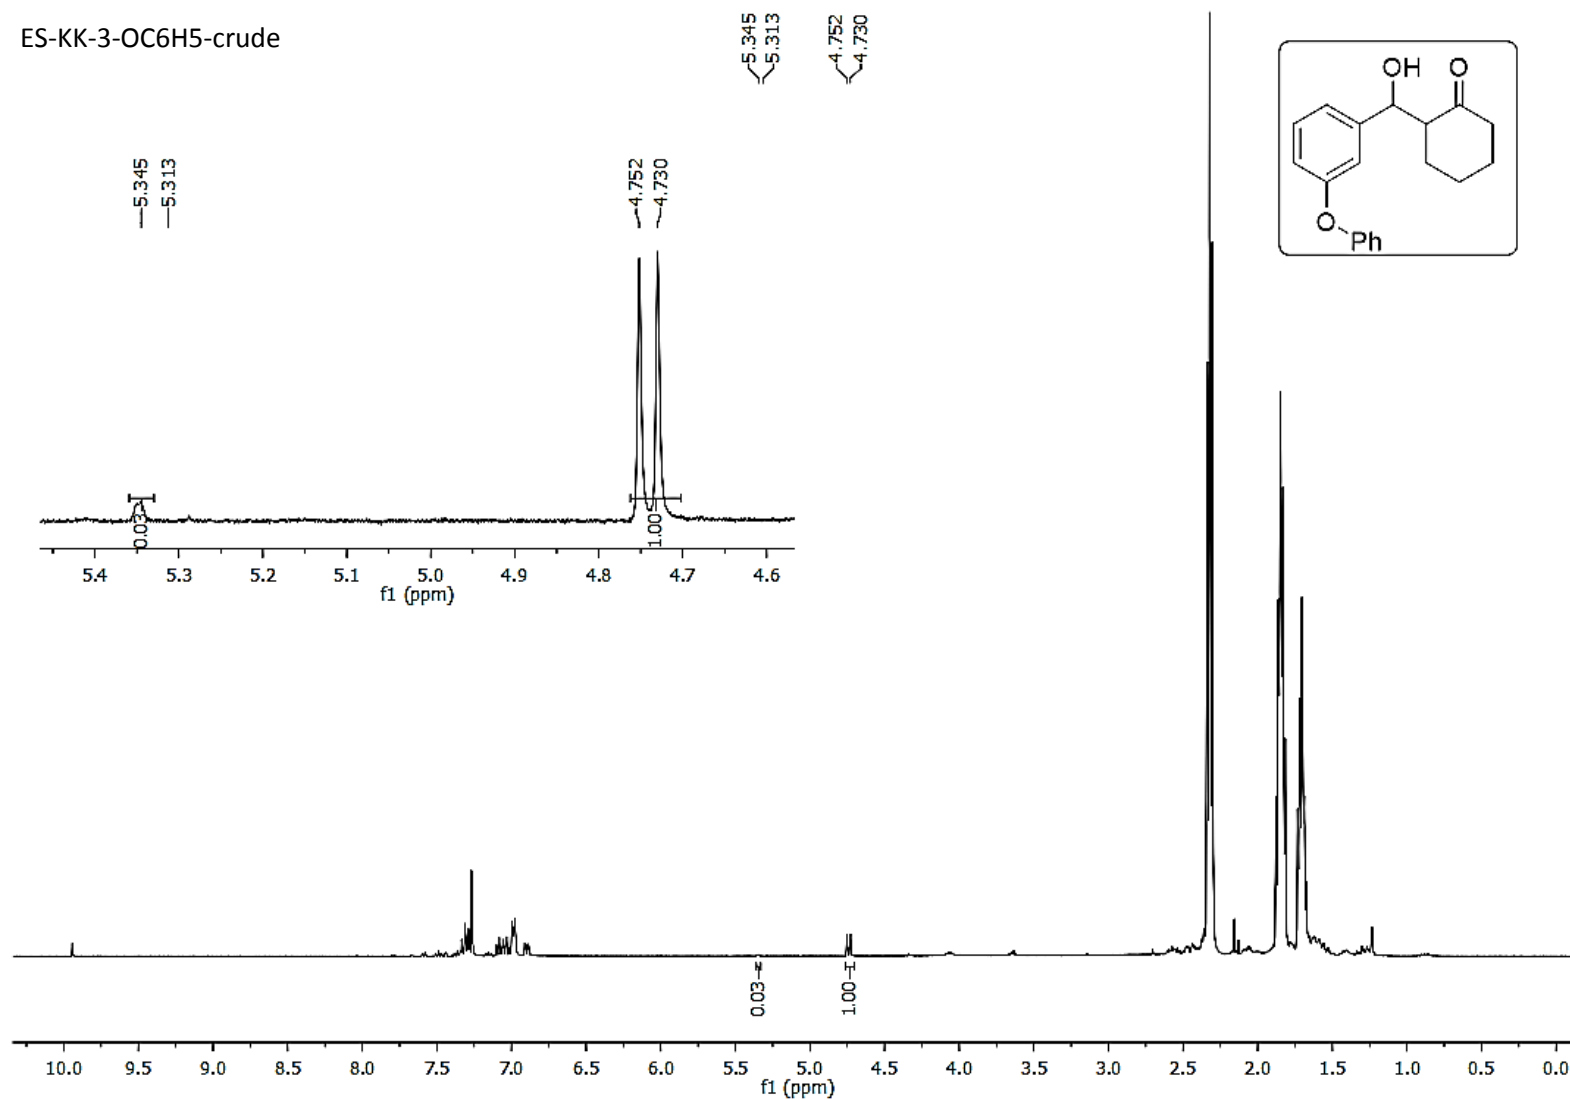

Table 2, Entry 14

ES-KK-PTAP-4Cl-3NO2;1H;CDC13,11/4/18

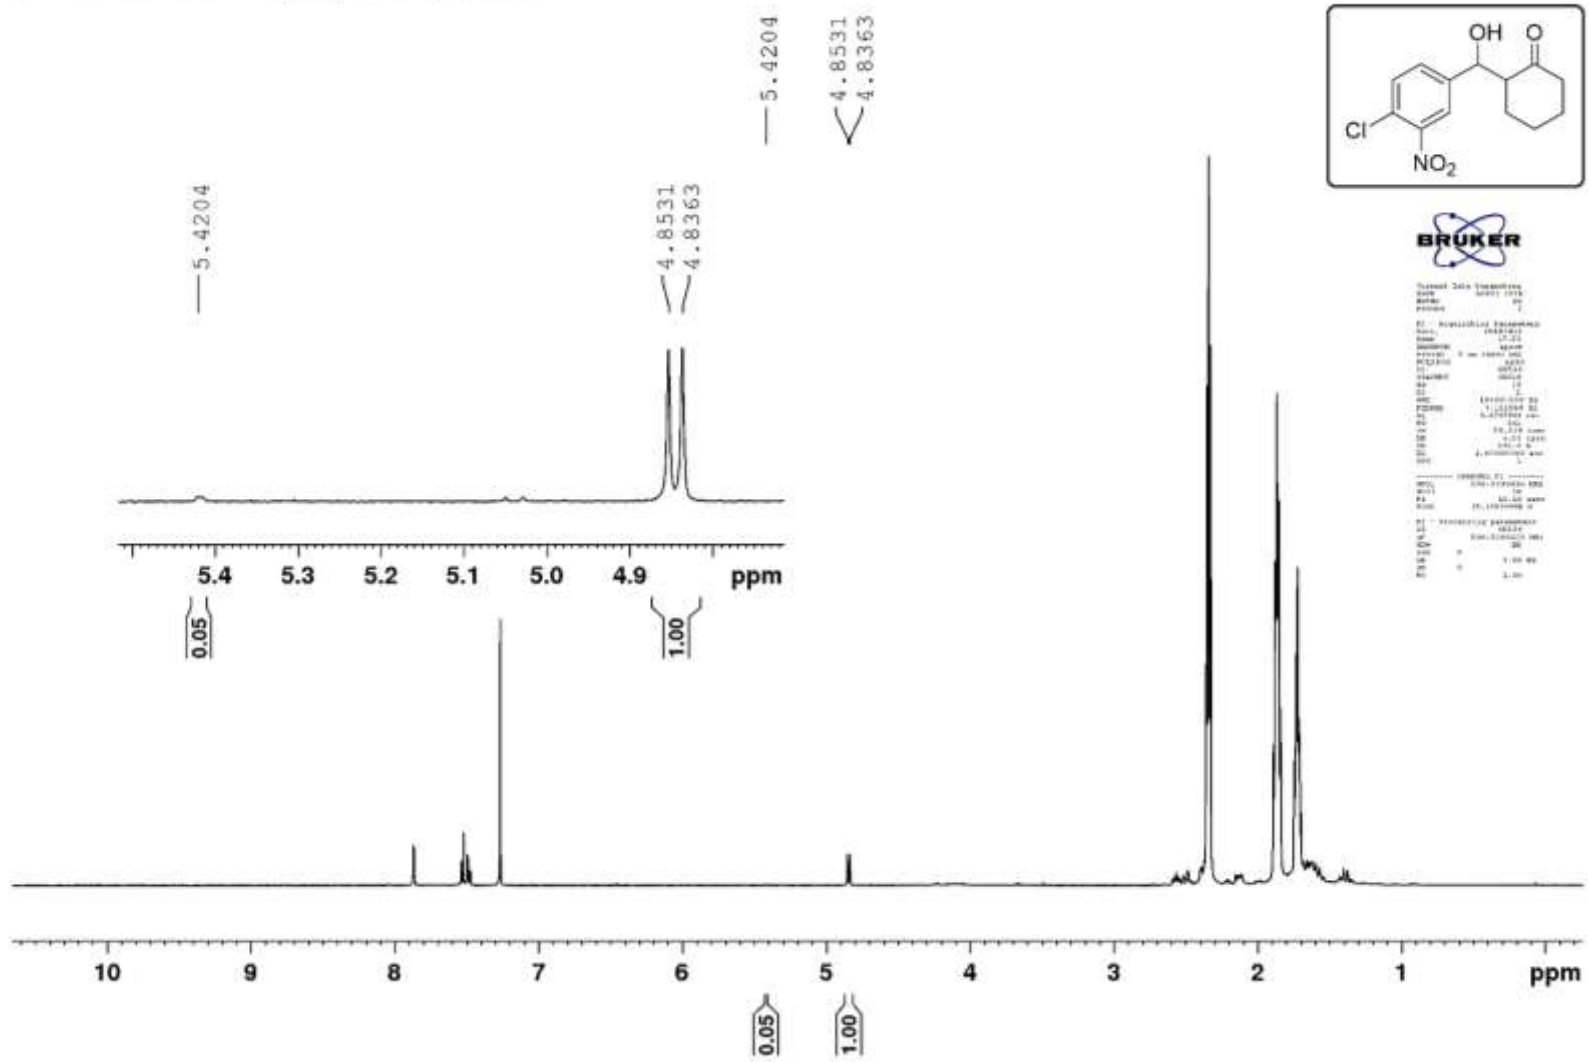

Table 2, Entry 15

ES-KK-PTAP-Ph-2; CDC13; 18/04/2018

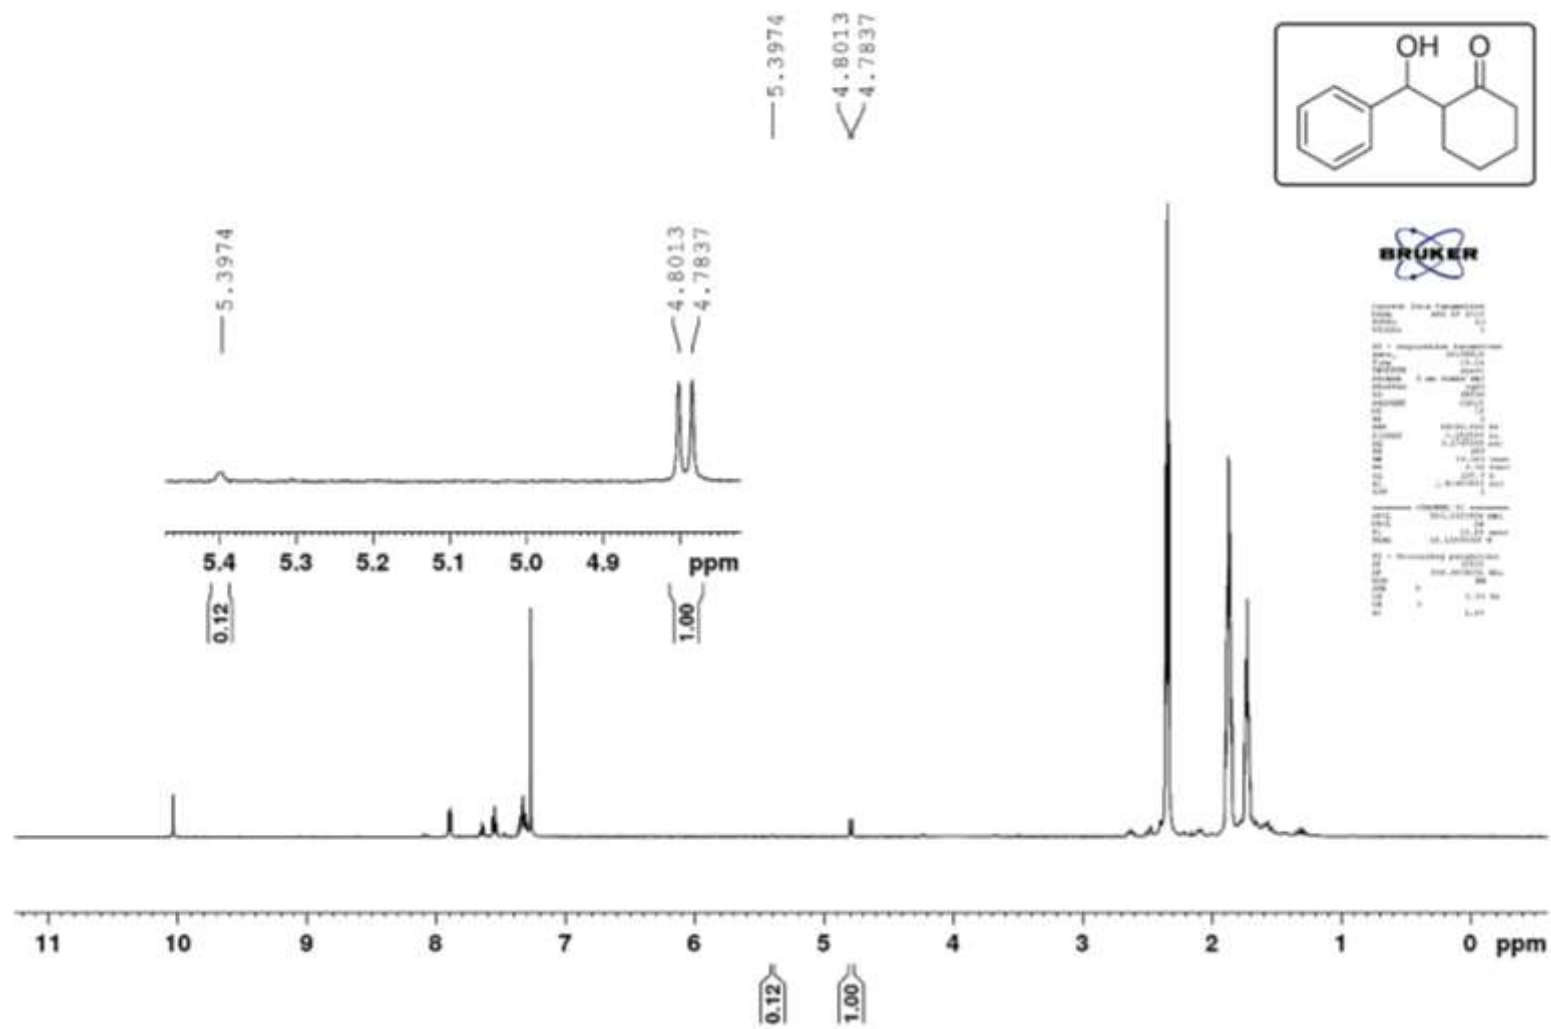

Table 2, Entry 16

ES-KK-PTAP-BNAPH

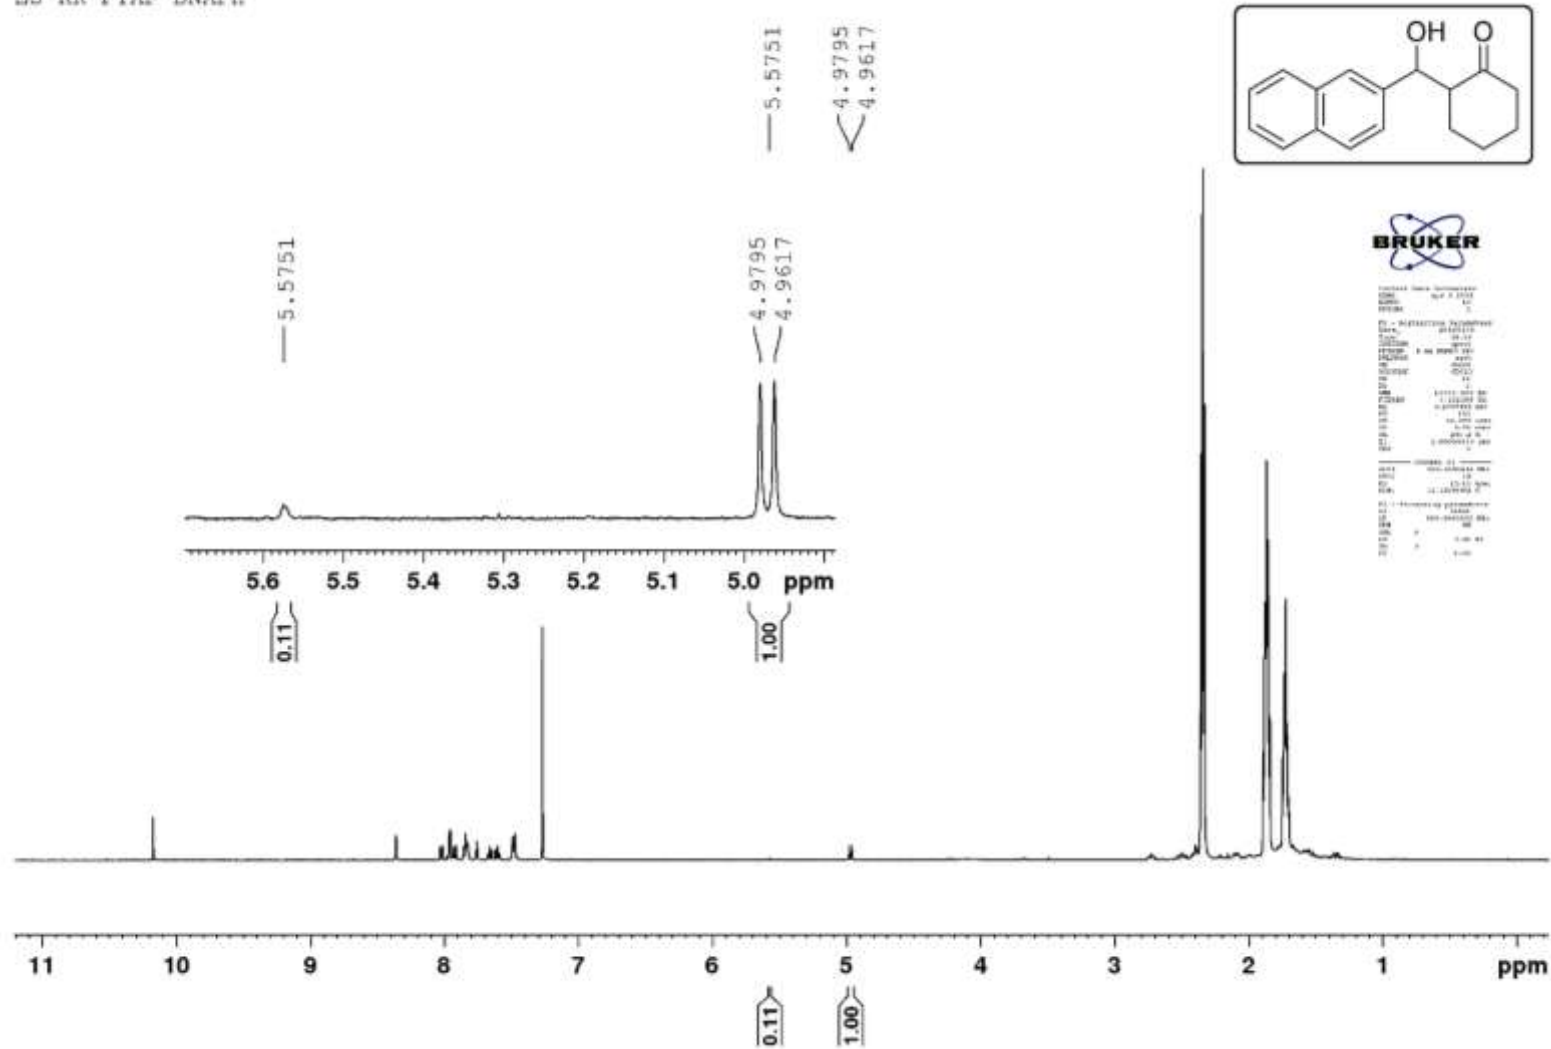

Table 2, Entry 17

ES-KK-4-OMe-crude

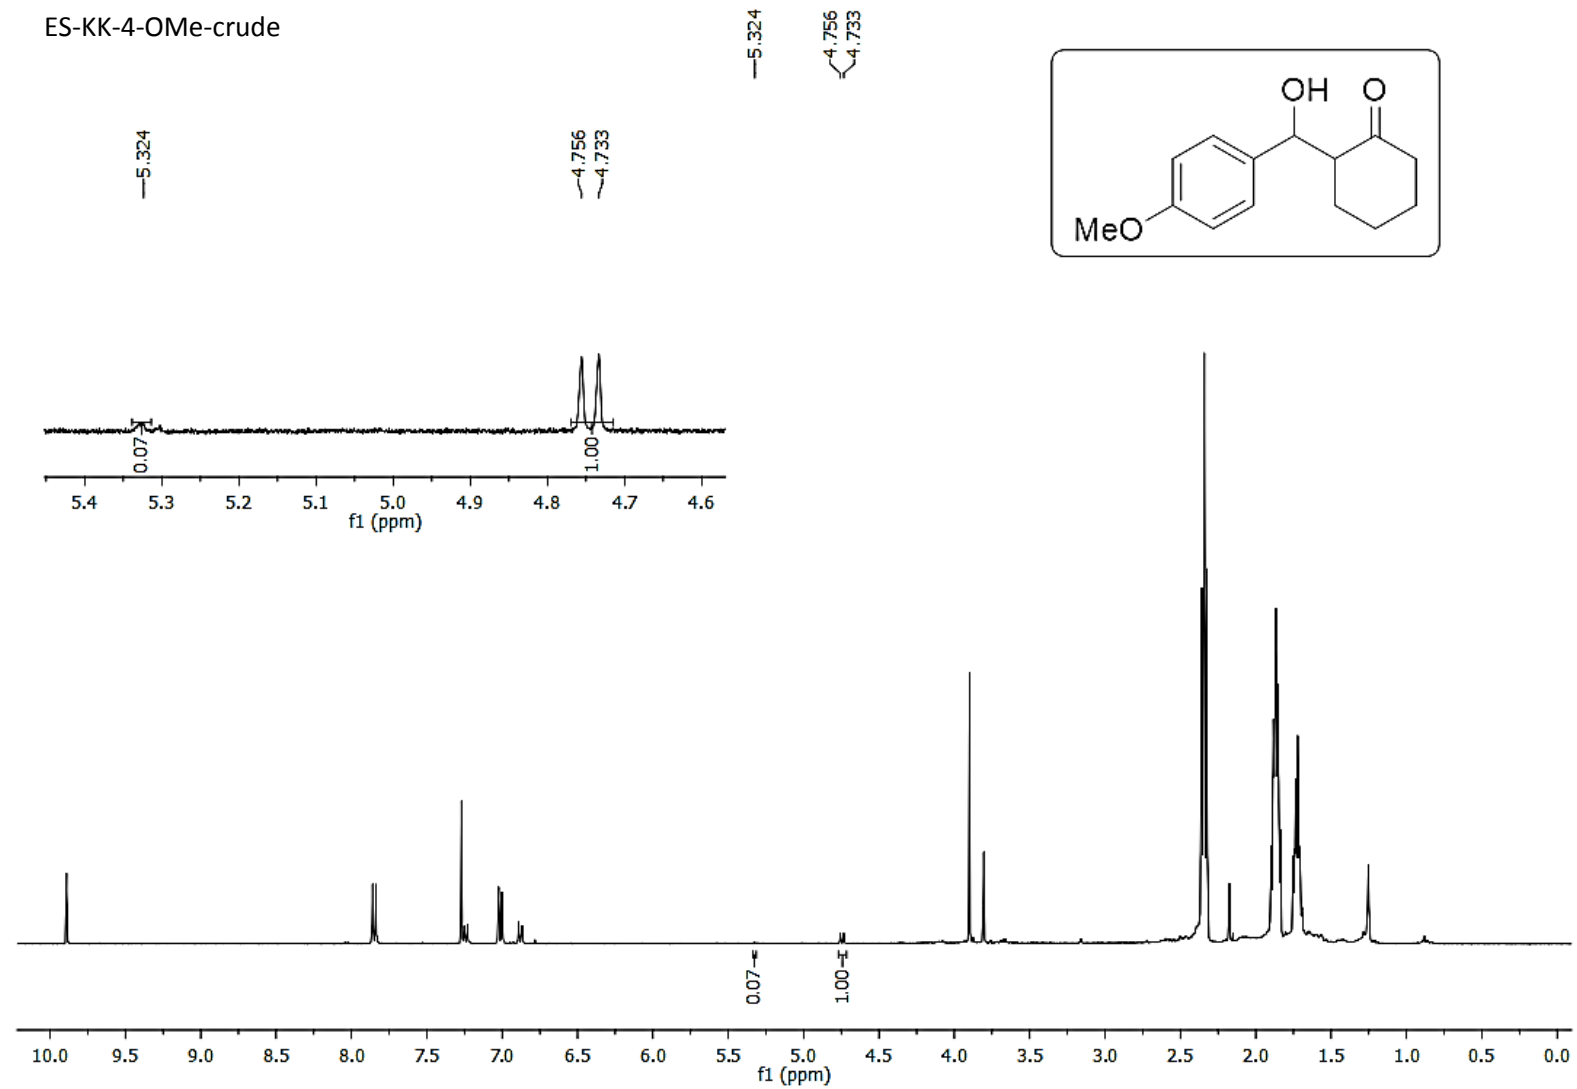

Table 3, Entry 1

ES-KK-PTAP-CP; 21/04/2018

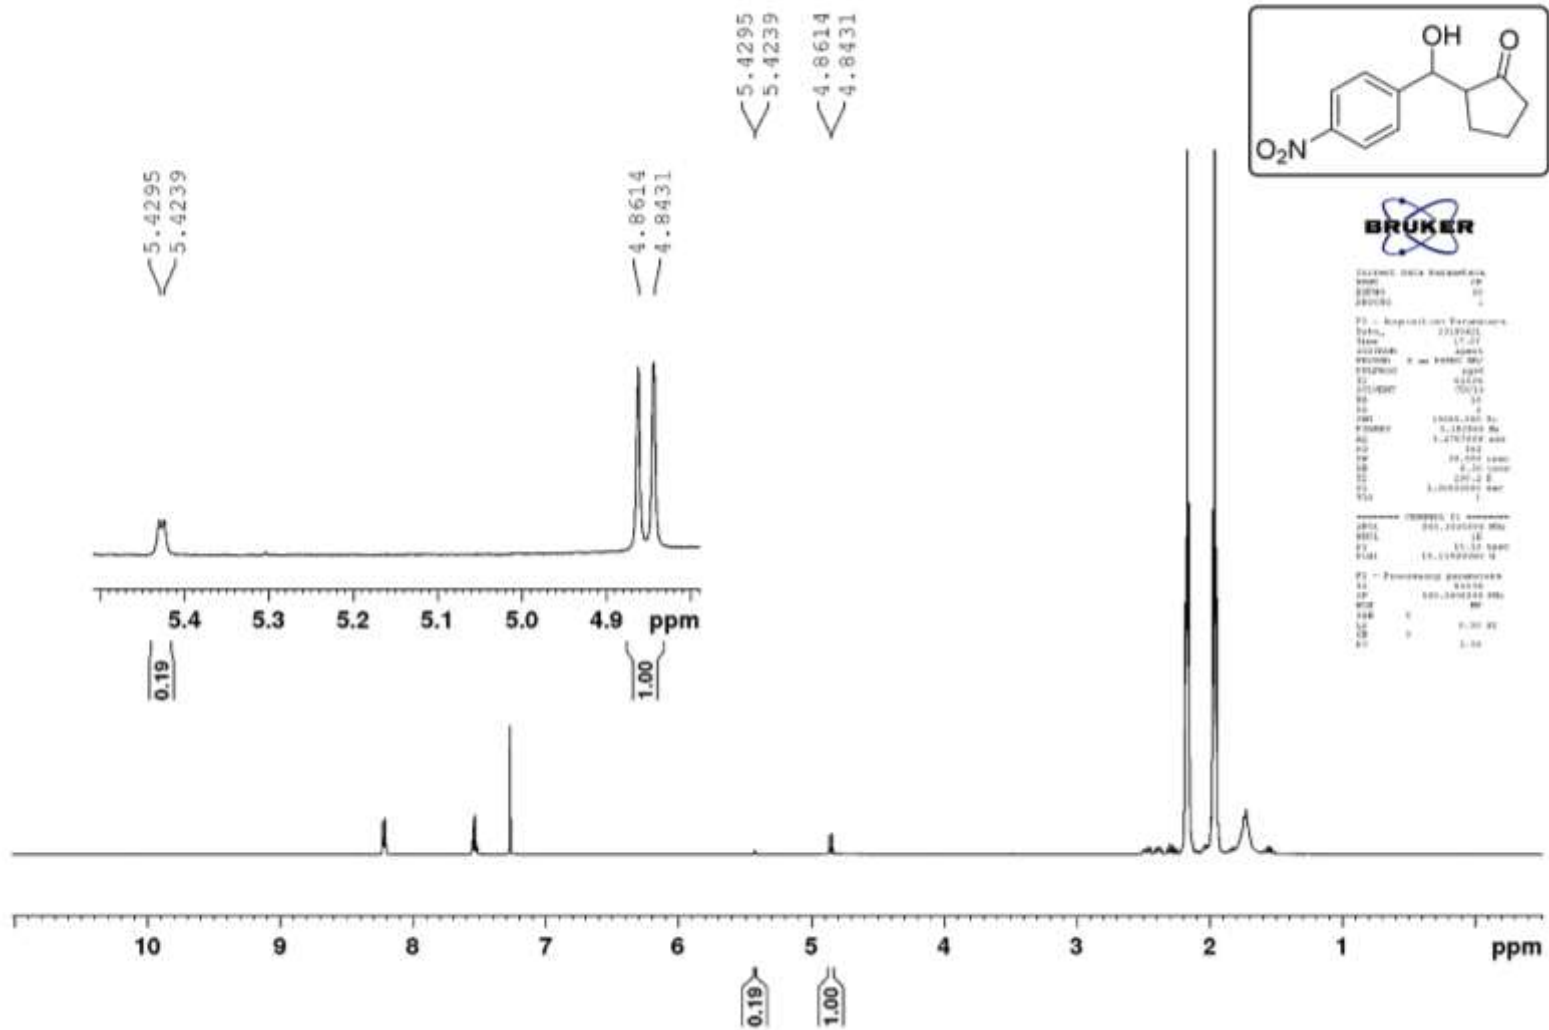



Table 4, Entry 1

ES-KK-PTAP-4MECY1H; CDCL3; 25/4/18;

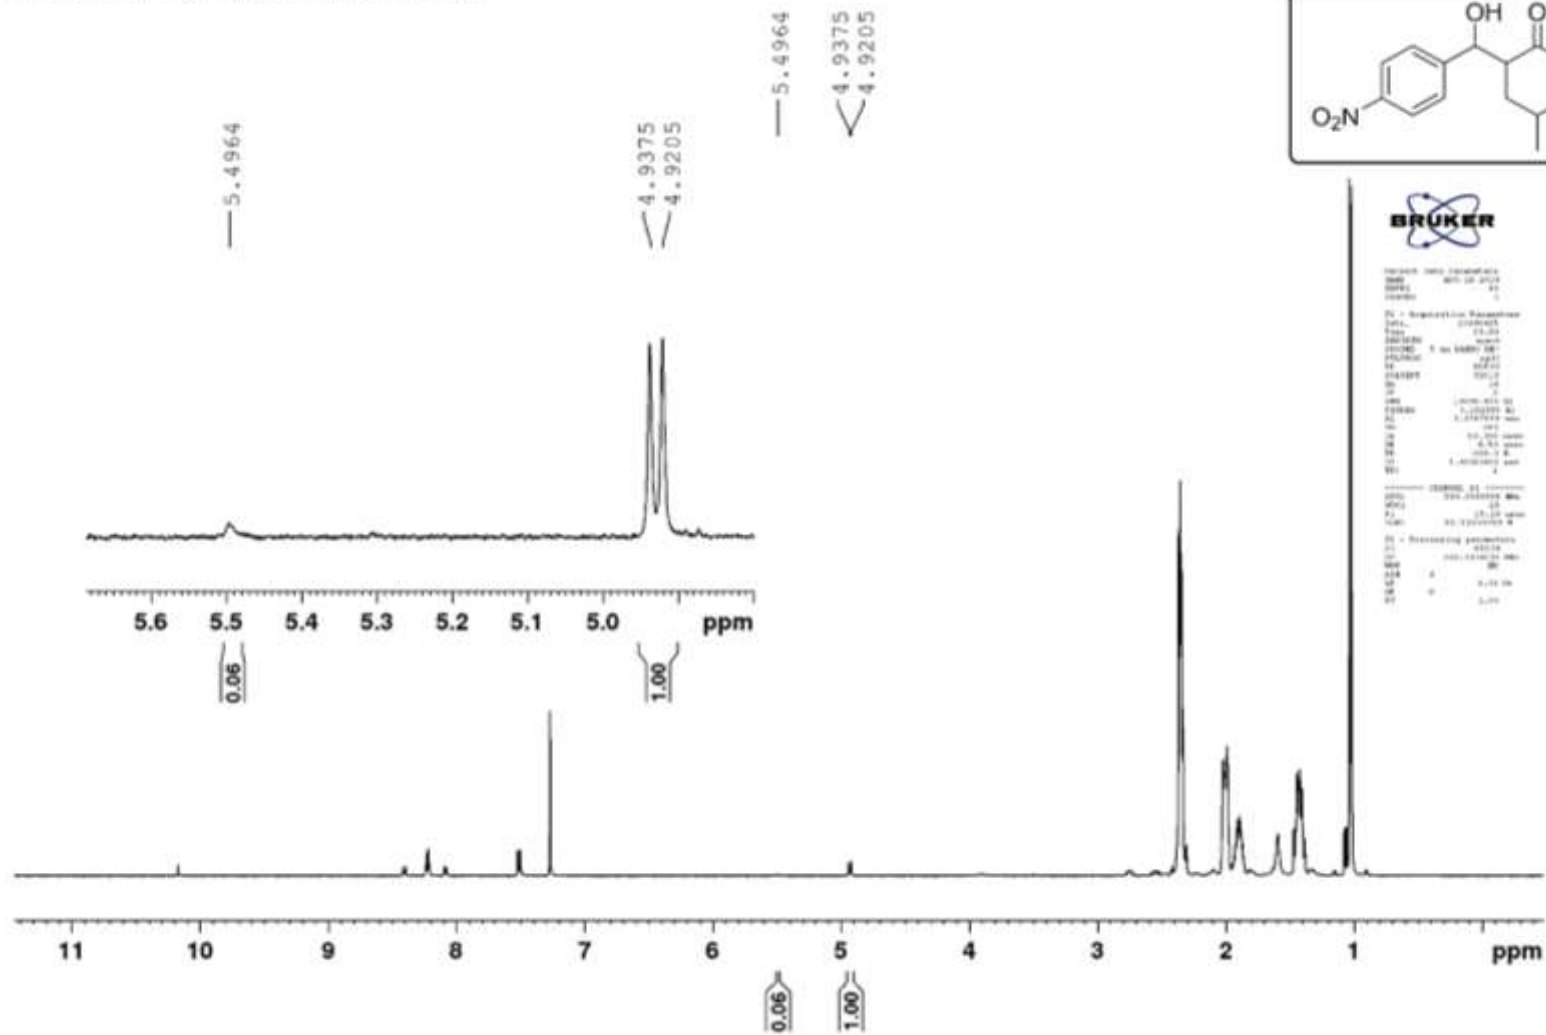

Table 4, Entry 2

ES-KK-EXP-167-CRUDE; 1H; 18/12/18

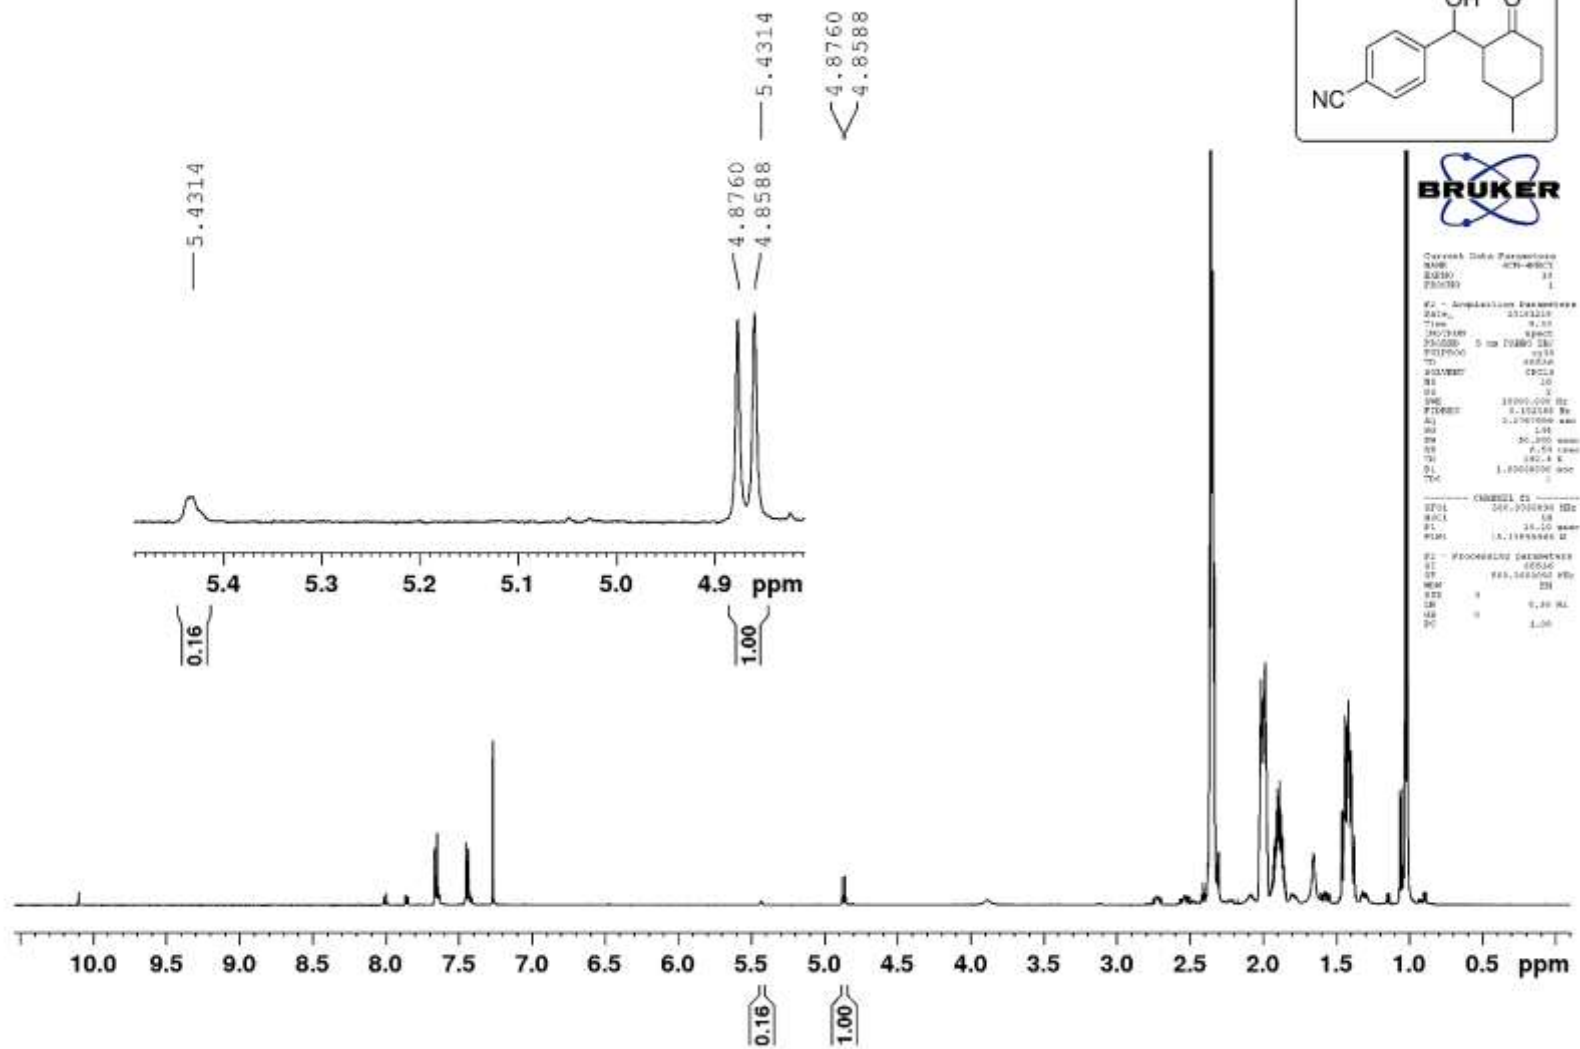

Table 4, Entry 3

ES-KK-EXP-183-CRUDE; 1H; CDC13; 14/2/19

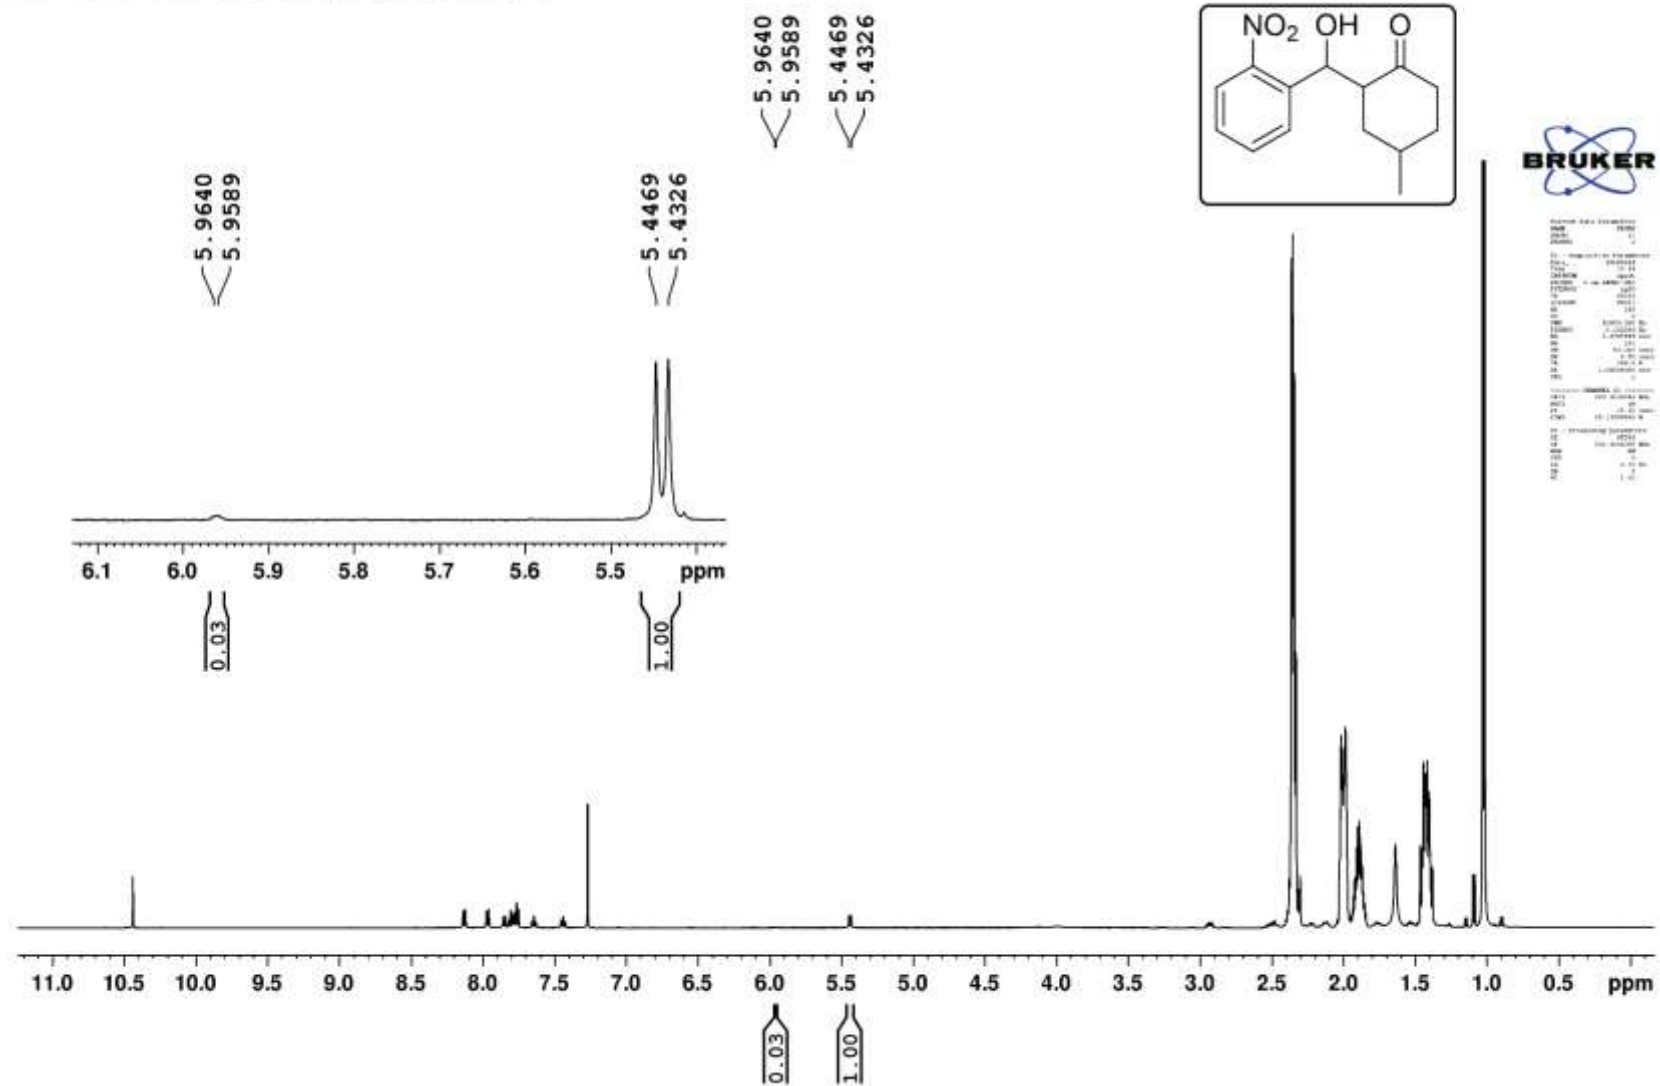

$^1\text{H}$  and  $^{13}\text{C}$  NMR spectra of the purified aldol adducts (isolated as a mixture of *syn* and *anti* diastereomers)

ES-KK-4-NO2-PDT; CDCI3; 01/05/18

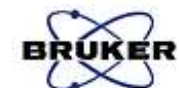

8.2244  
8.2071  
7.5229  
7.5055  
4.9154  
4.8988  
4.0724  
4.0674  
2.6262  
2.6156  
2.6098  
2.5993  
2.5894  
2.5842  
2.5728  
2.5182  
2.4908  
2.4875  
2.4056  
2.3934  
2.3786  
2.3662  
2.3515  
2.3390  
2.1468  
2.1408  
2.1348  
2.1283  
2.1216  
2.1145  
2.1083  
2.1024  
2.0967  
1.8531  
1.8499  
1.8256  
1.7249  
1.7173  
1.7090  
1.6987  
1.6913  
1.6836  
1.6726  
1.6653  
1.6576  
1.6459  
1.6390  
1.6315  
1.6061  
1.5996  
1.4349  
1.4288  
1.4179  
1.4049  
1.3981  
1.3792  
1.3715  
1.3538  
1.3443

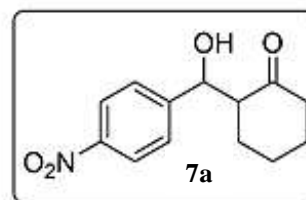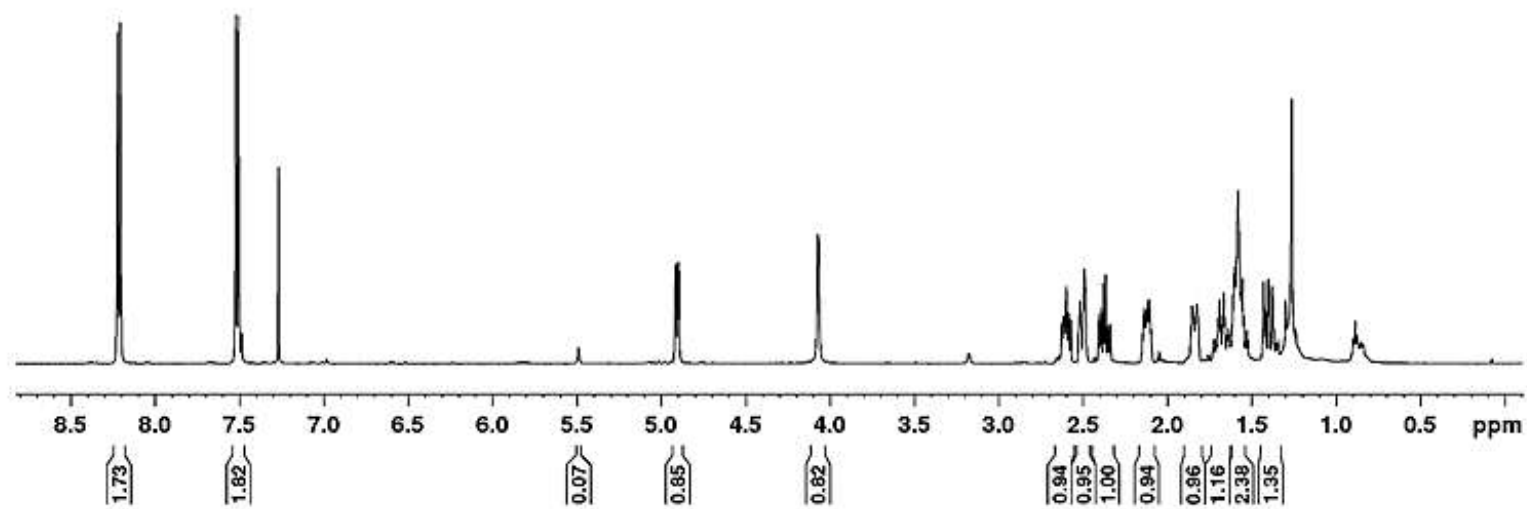

ES-KK-4-NO2-PDT; CDCl3; 01/05/18

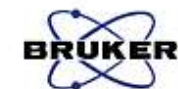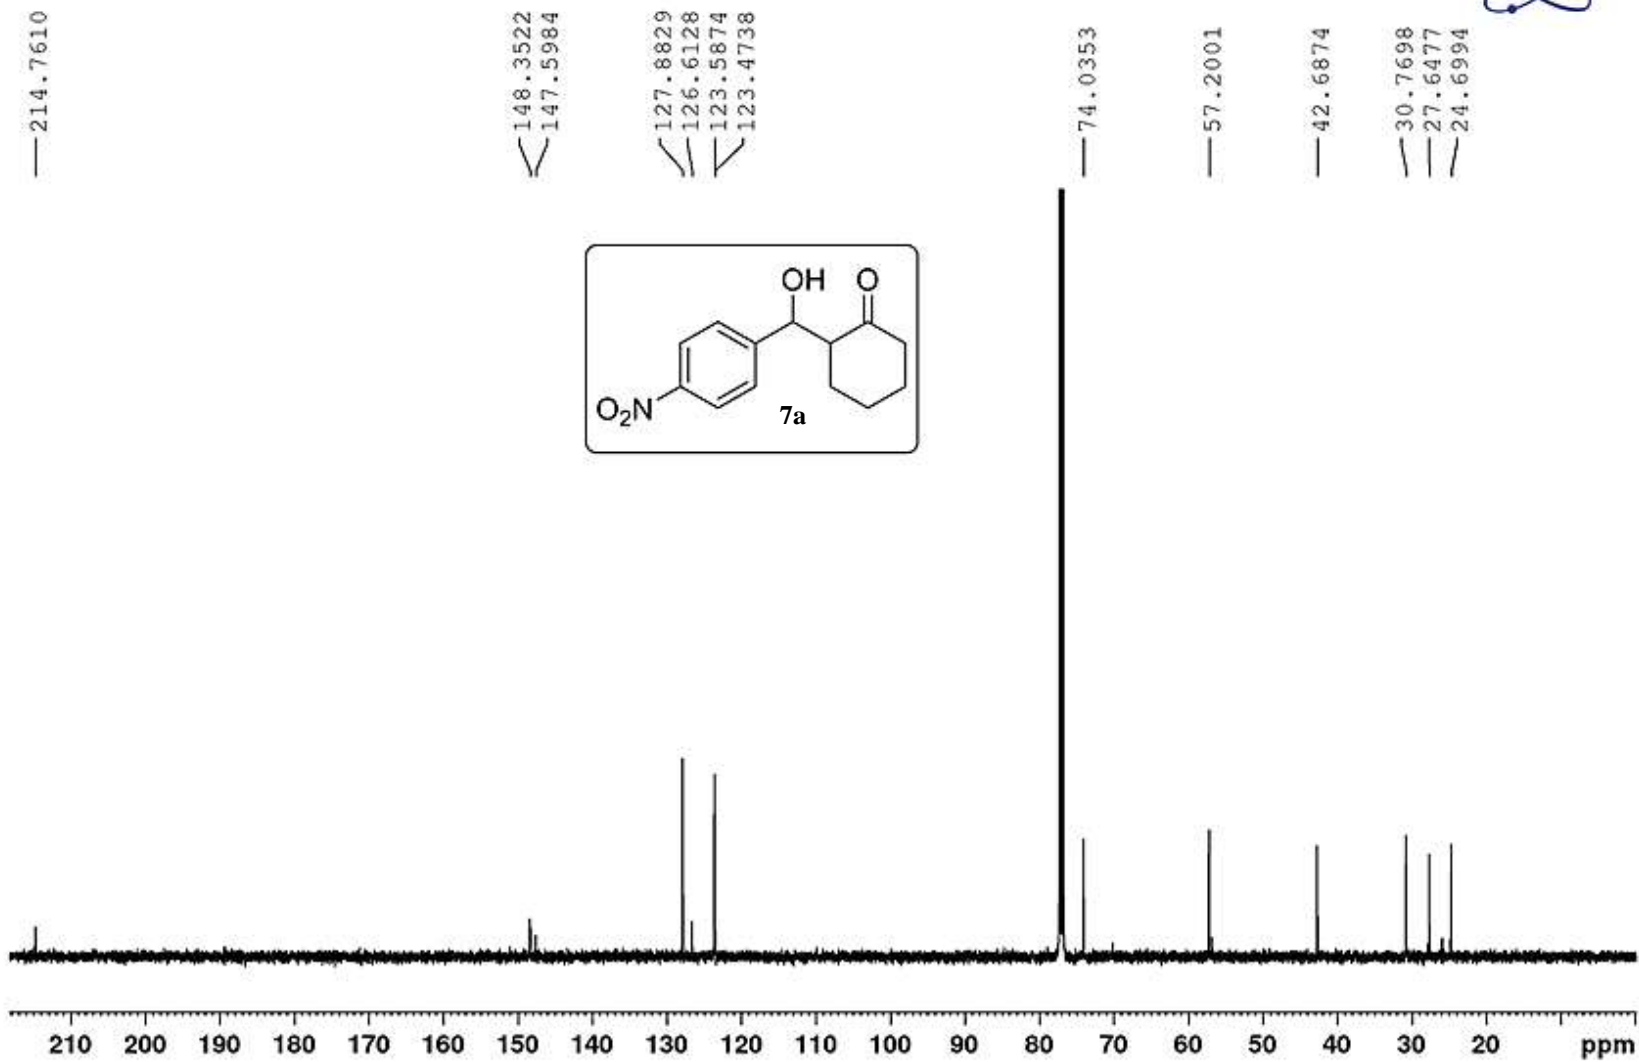

ES-KK-4-CN-PDT; CDCl<sub>3</sub>; 13/11/18

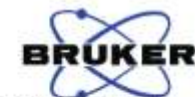

7.6584  
7.6421  
7.4570  
7.4406  
7.2688

5.4339

4.8497  
4.8329

4.0570  
2.6008  
2.5840  
2.5747  
2.5635  
2.5481  
2.5103  
2.4829  
2.3972  
2.3855  
2.3702  
2.3580  
2.3301  
2.1289  
2.1225  
2.1087  
2.1026  
2.0968  
1.8443  
1.8167  
1.7093  
1.6829  
1.6567  
1.6306  
1.5992  
1.5742  
1.5686  
1.5539  
1.5474  
1.5212  
1.3958  
1.3757  
1.3684

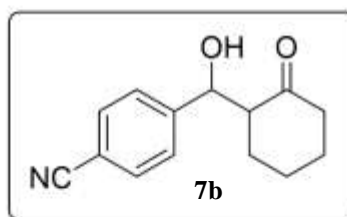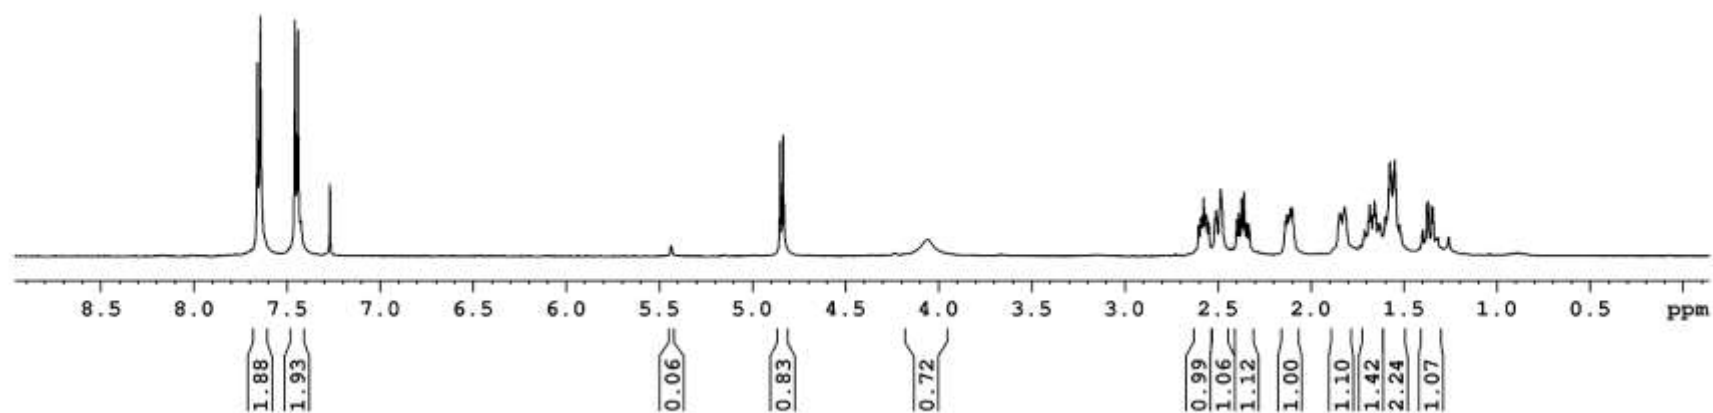

ES-KK-4-CN-PDT; CDC13; 13/11/18

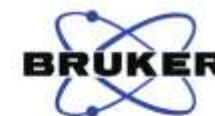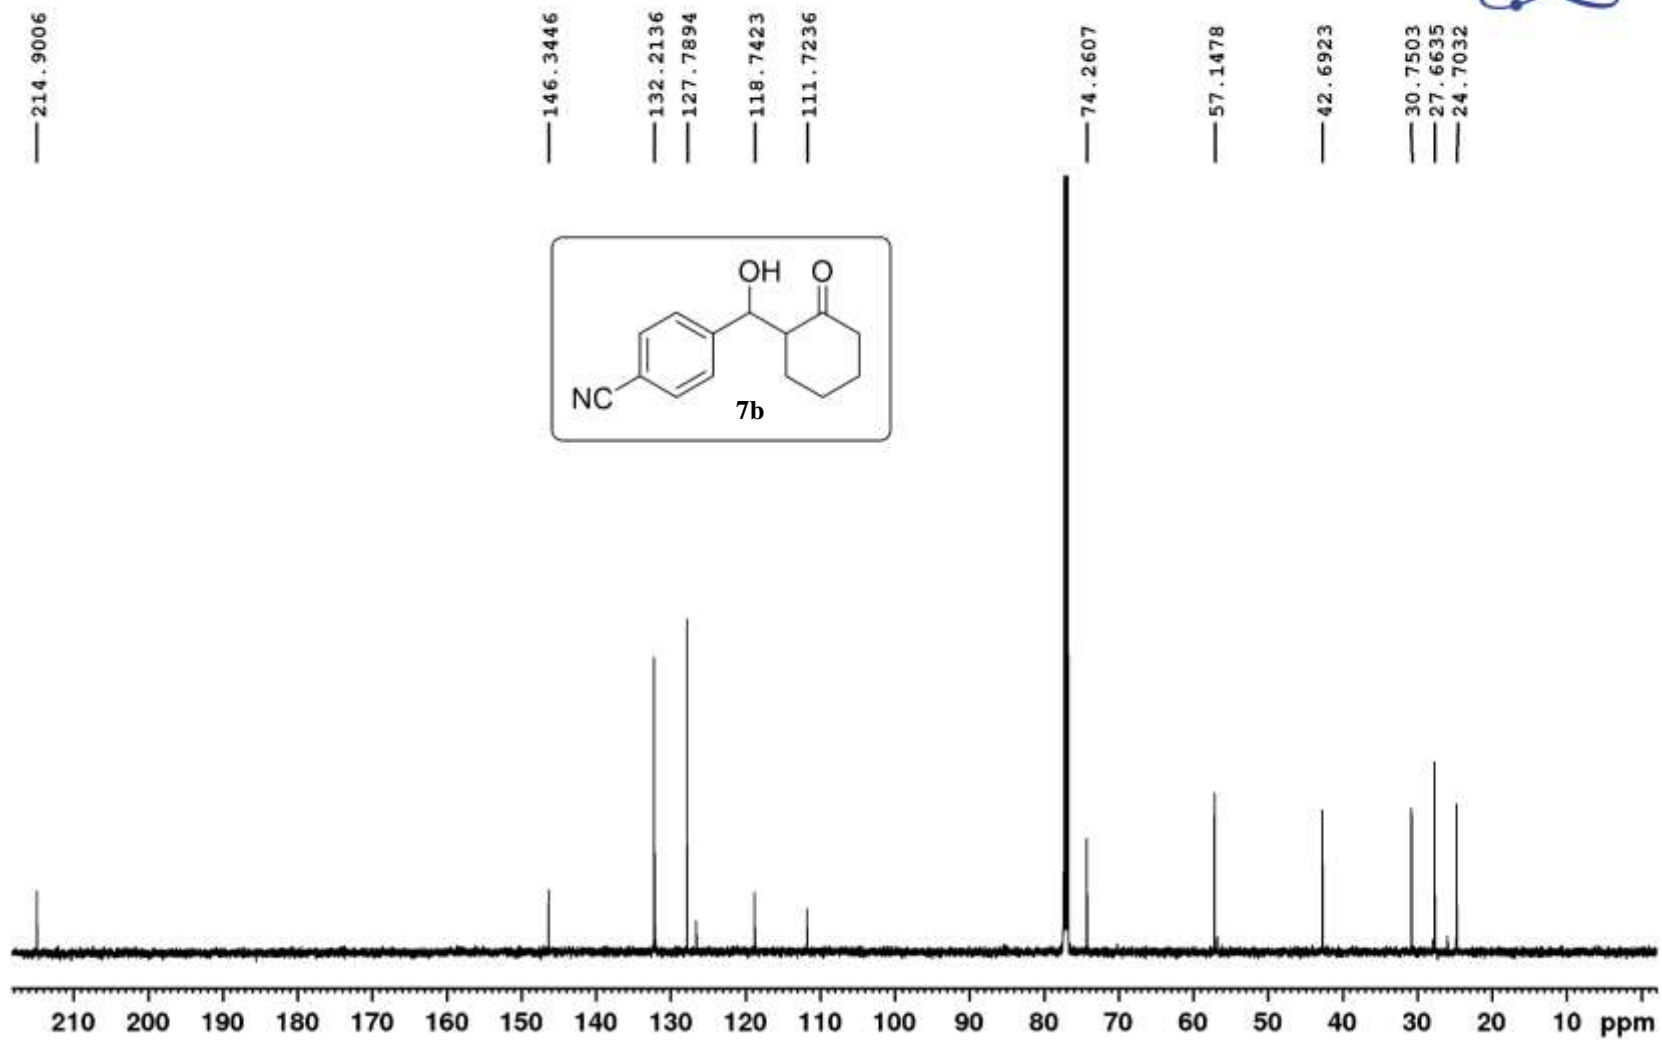

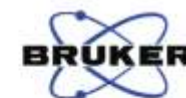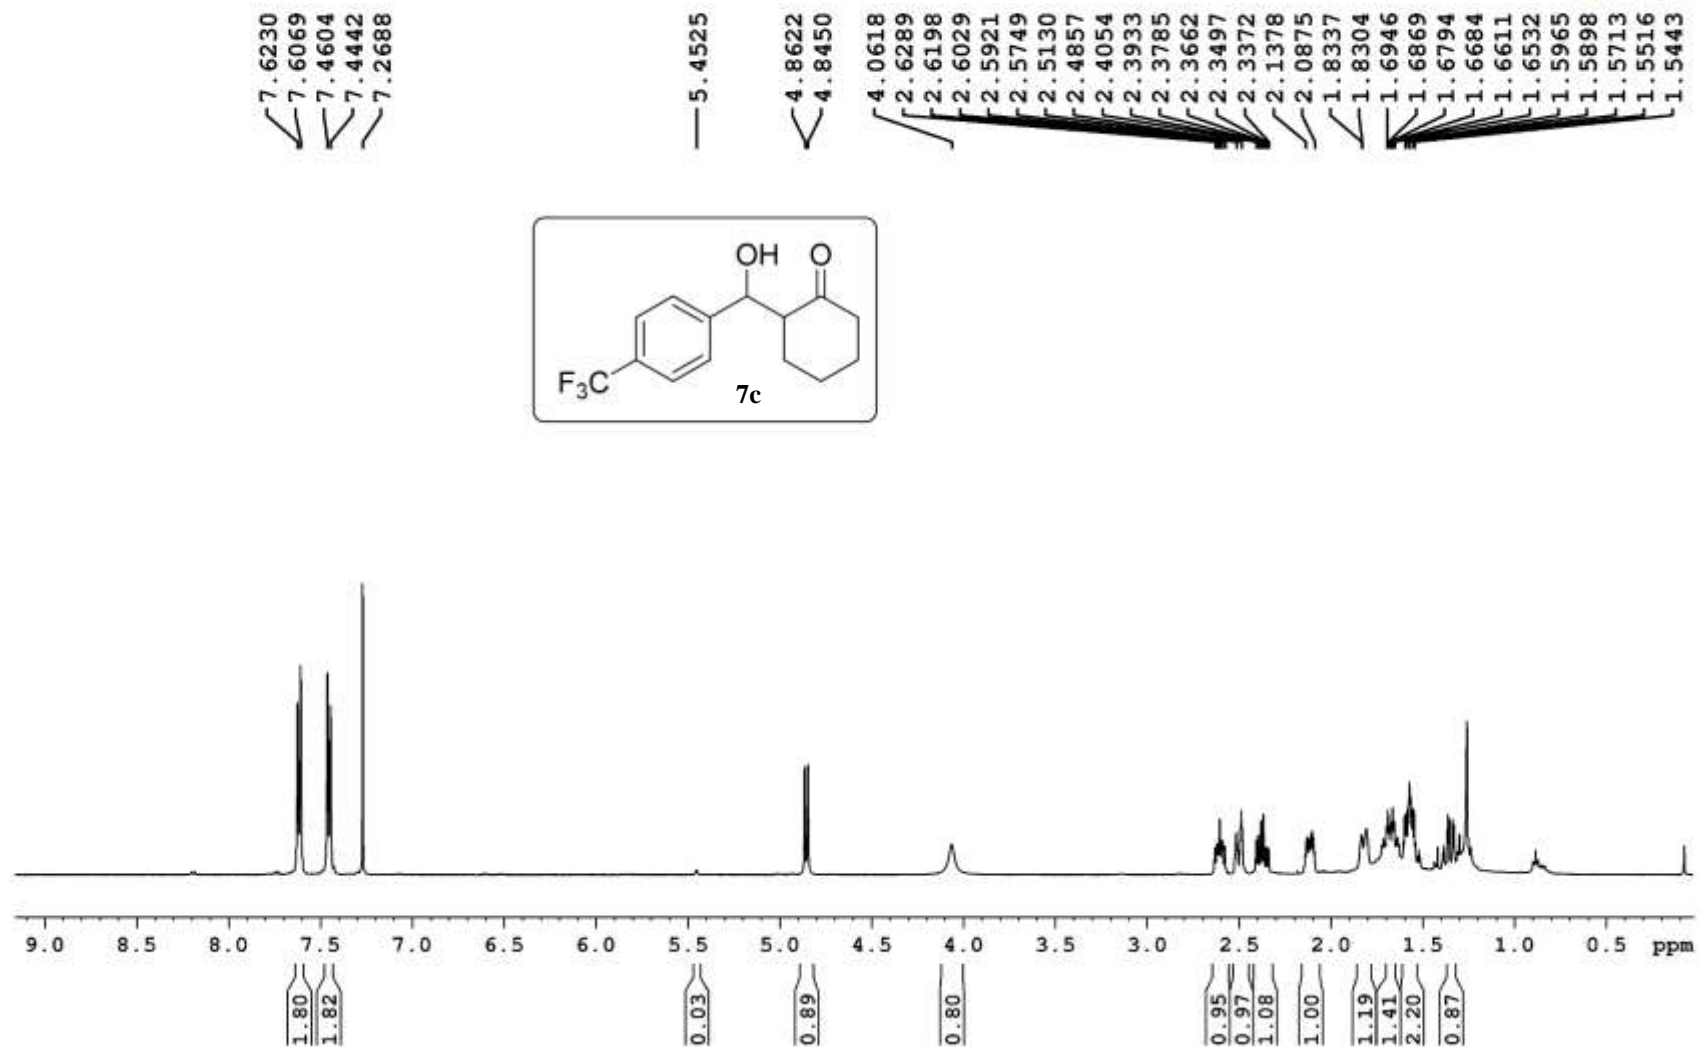



ES-KK-4-CF3-PDT; CDCl3; 08/09/18

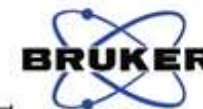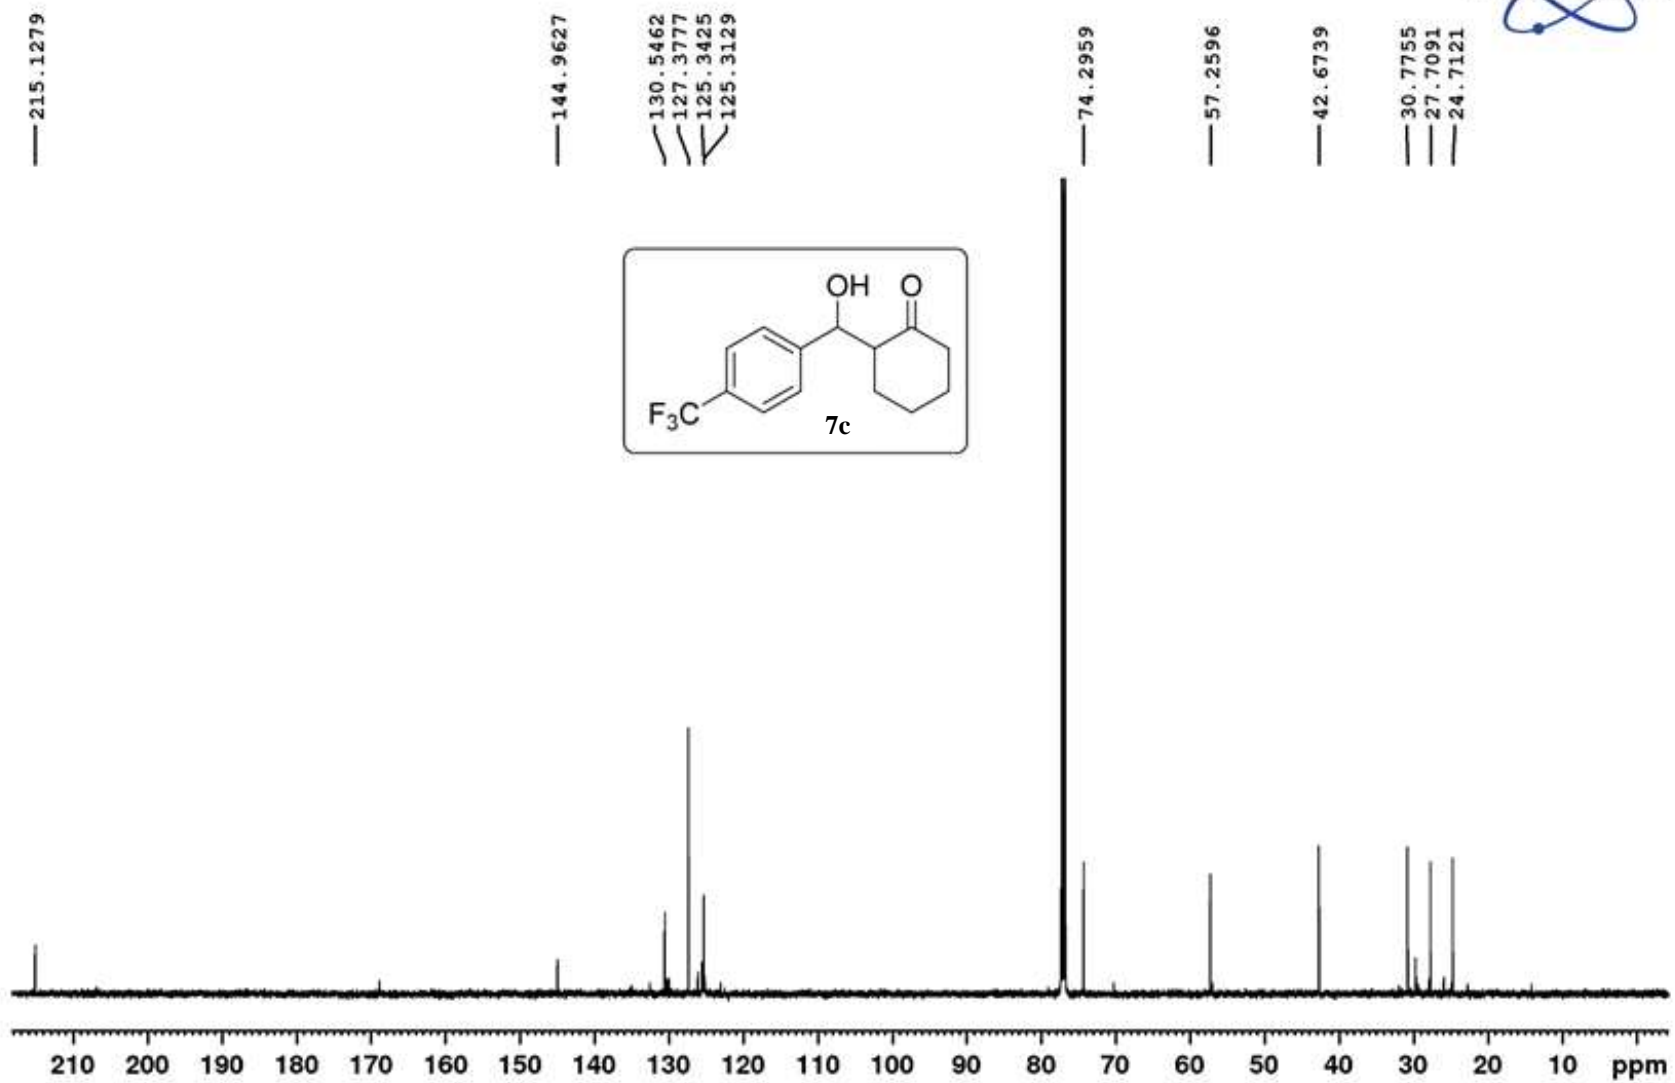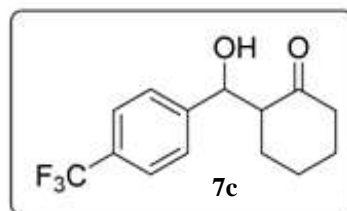

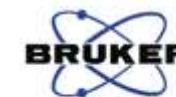

7.4890  
7.4724  
7.2689  
7.2160  
7.1994

5.3467  
4.7701  
4.7658  
4.7528  
4.7485  
3.9734  
3.9681  
2.5870  
2.5774  
2.5696  
2.5611  
2.5507  
2.5456  
2.5341  
2.5015  
2.4742  
2.3928  
2.3808  
2.3660  
2.3537  
2.3392  
2.3266  
2.1272  
2.1211  
2.1151  
2.1086  
2.1018  
2.0947  
2.0886  
2.0826  
2.0769  
1.8226  
1.7982  
1.7127  
1.7050  
1.6865  
1.6788  
1.6711  
1.6605  
1.6527  
1.6451  
1.6342  
1.6263  
1.6168

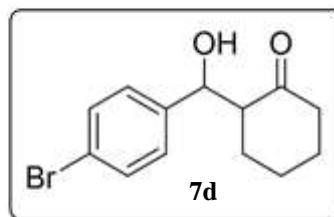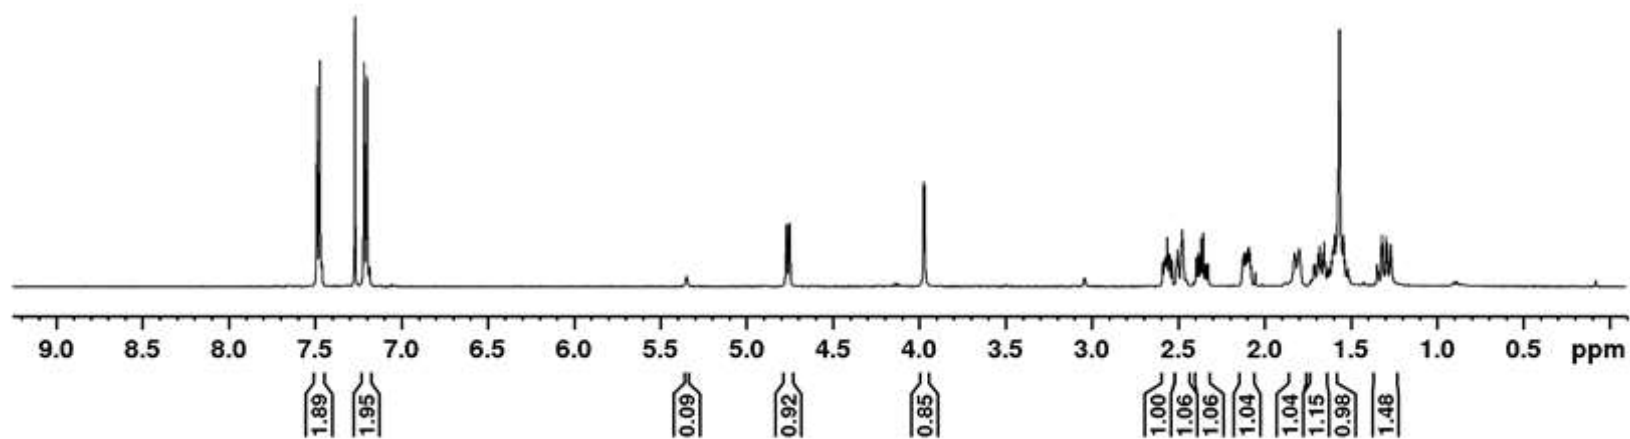

ES-KK-4Br-PDT; CDC13; 23/05/2018

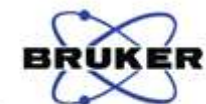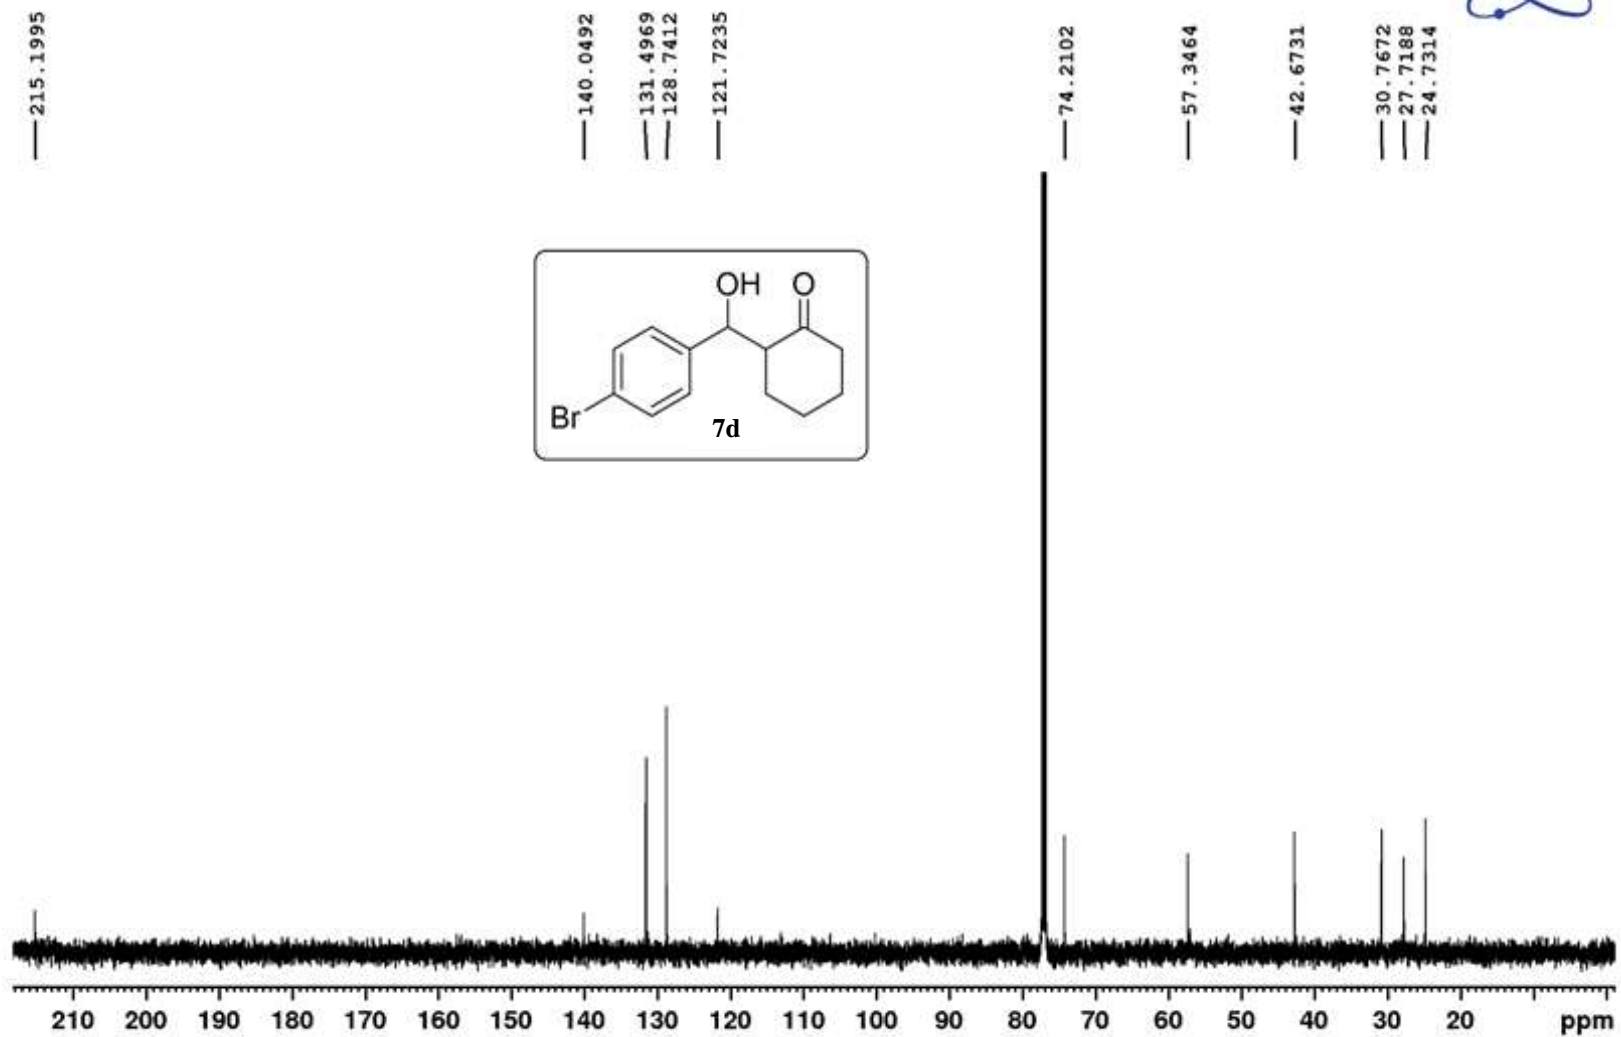

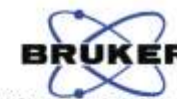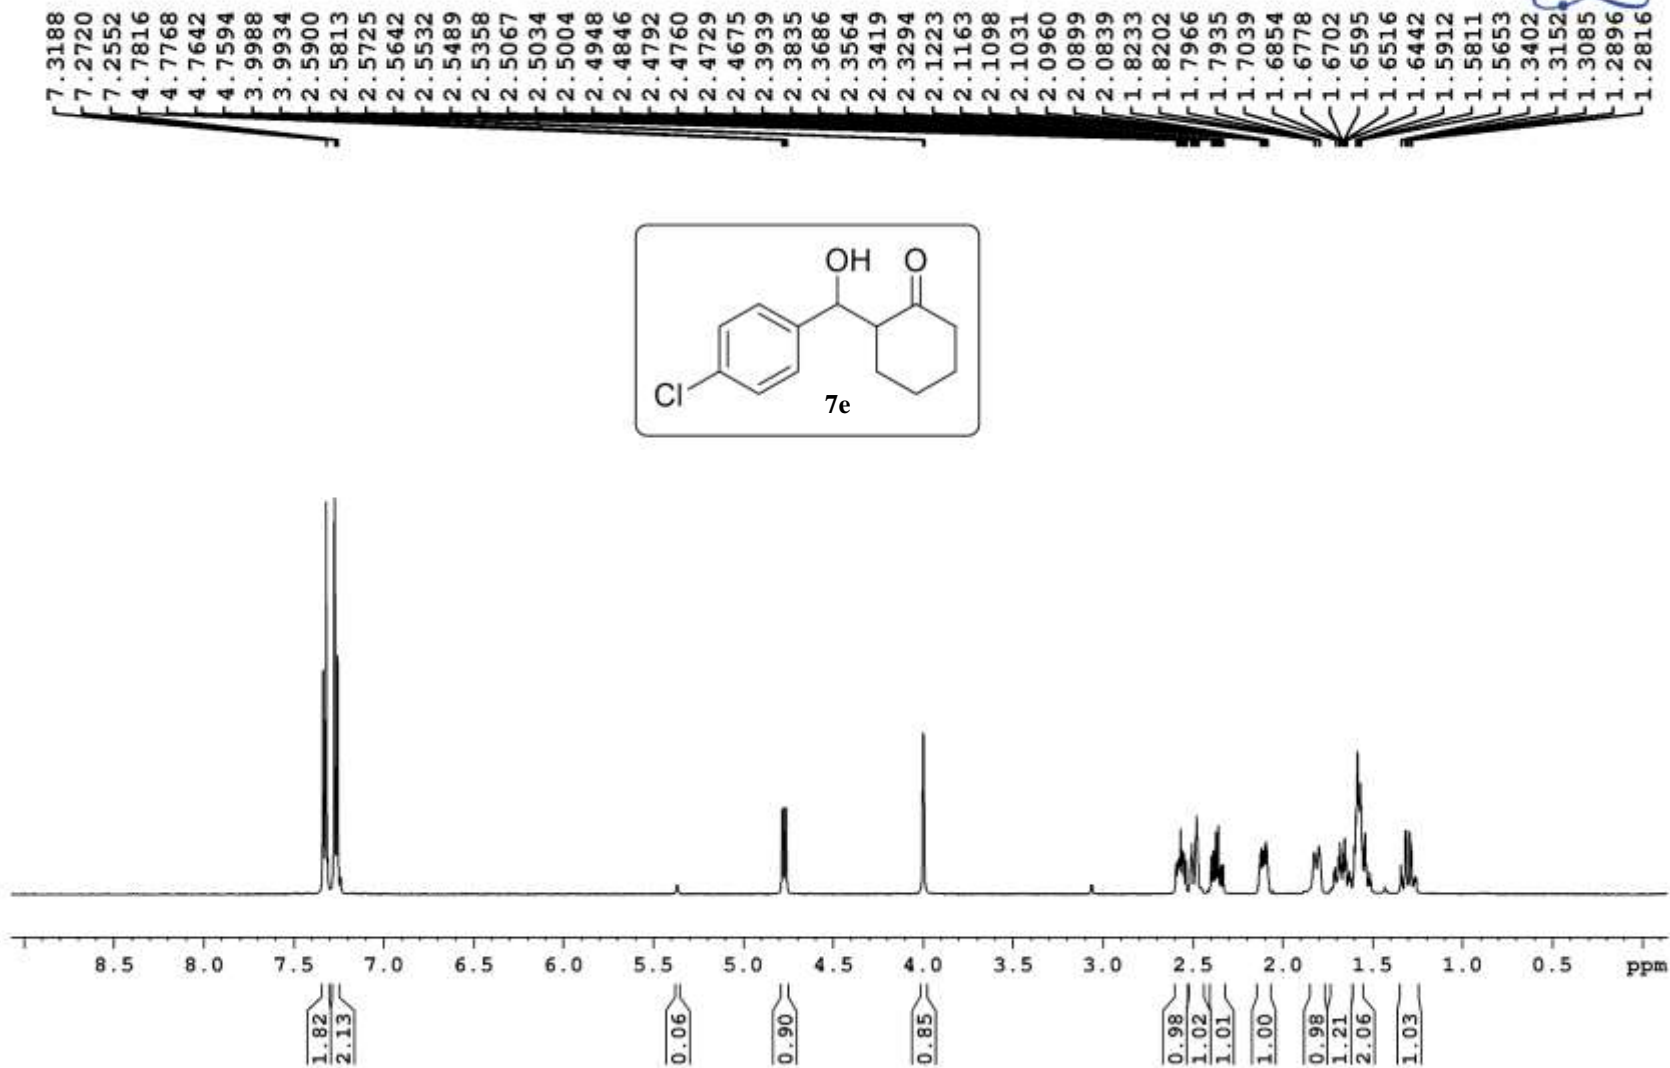

ES-KK-4-Cl-PDT; CDCl<sub>3</sub>; 21/11/18

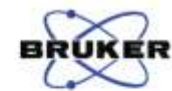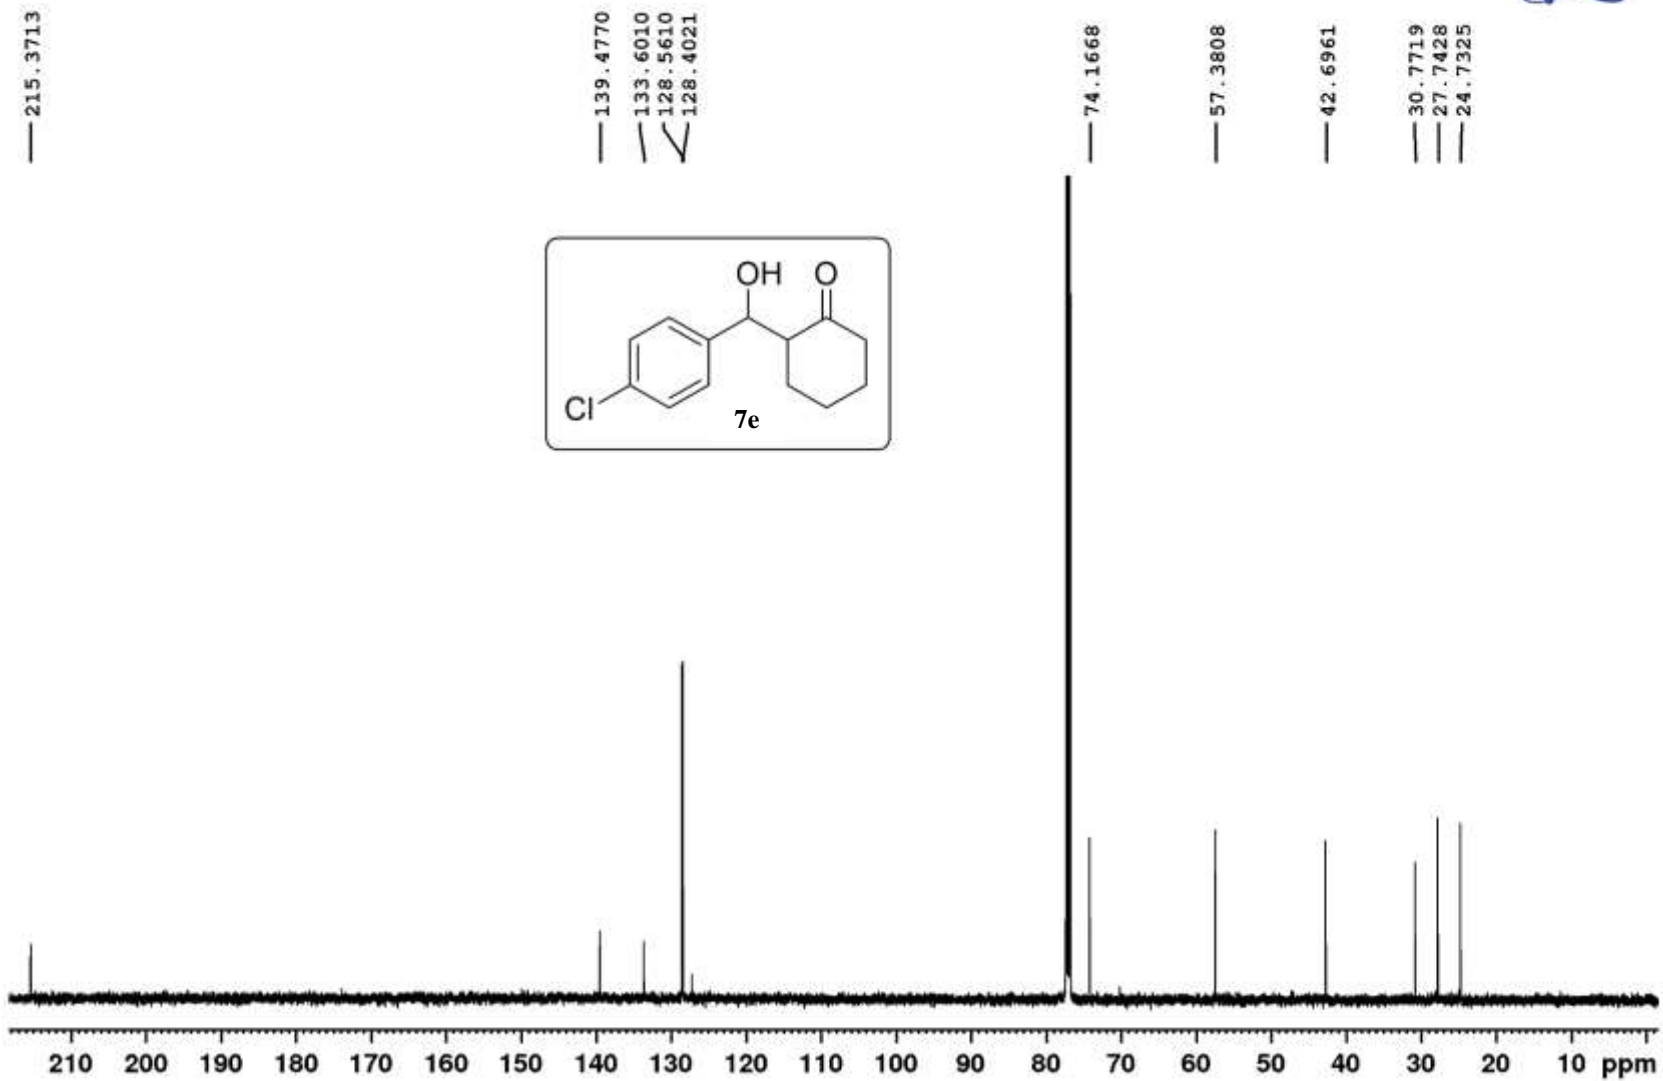

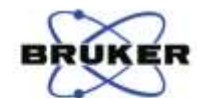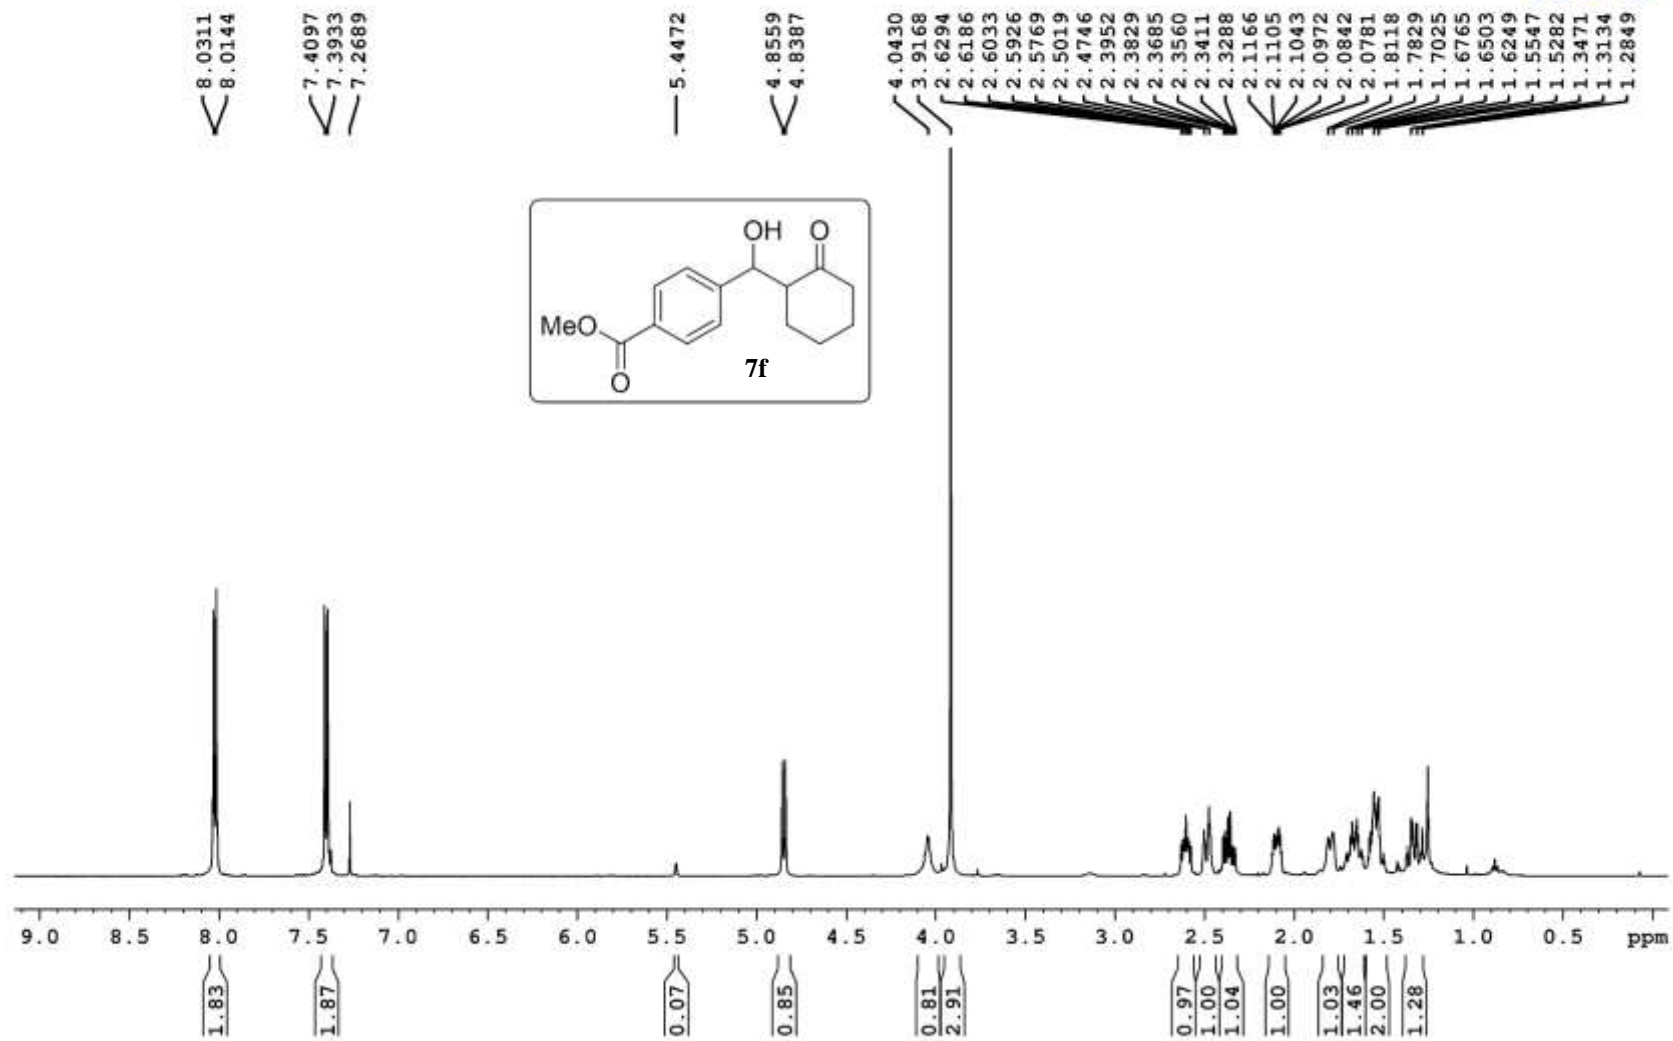

ES-KK-4-COOMe-PDT; CDC13; 31/10/18

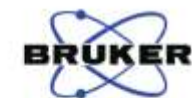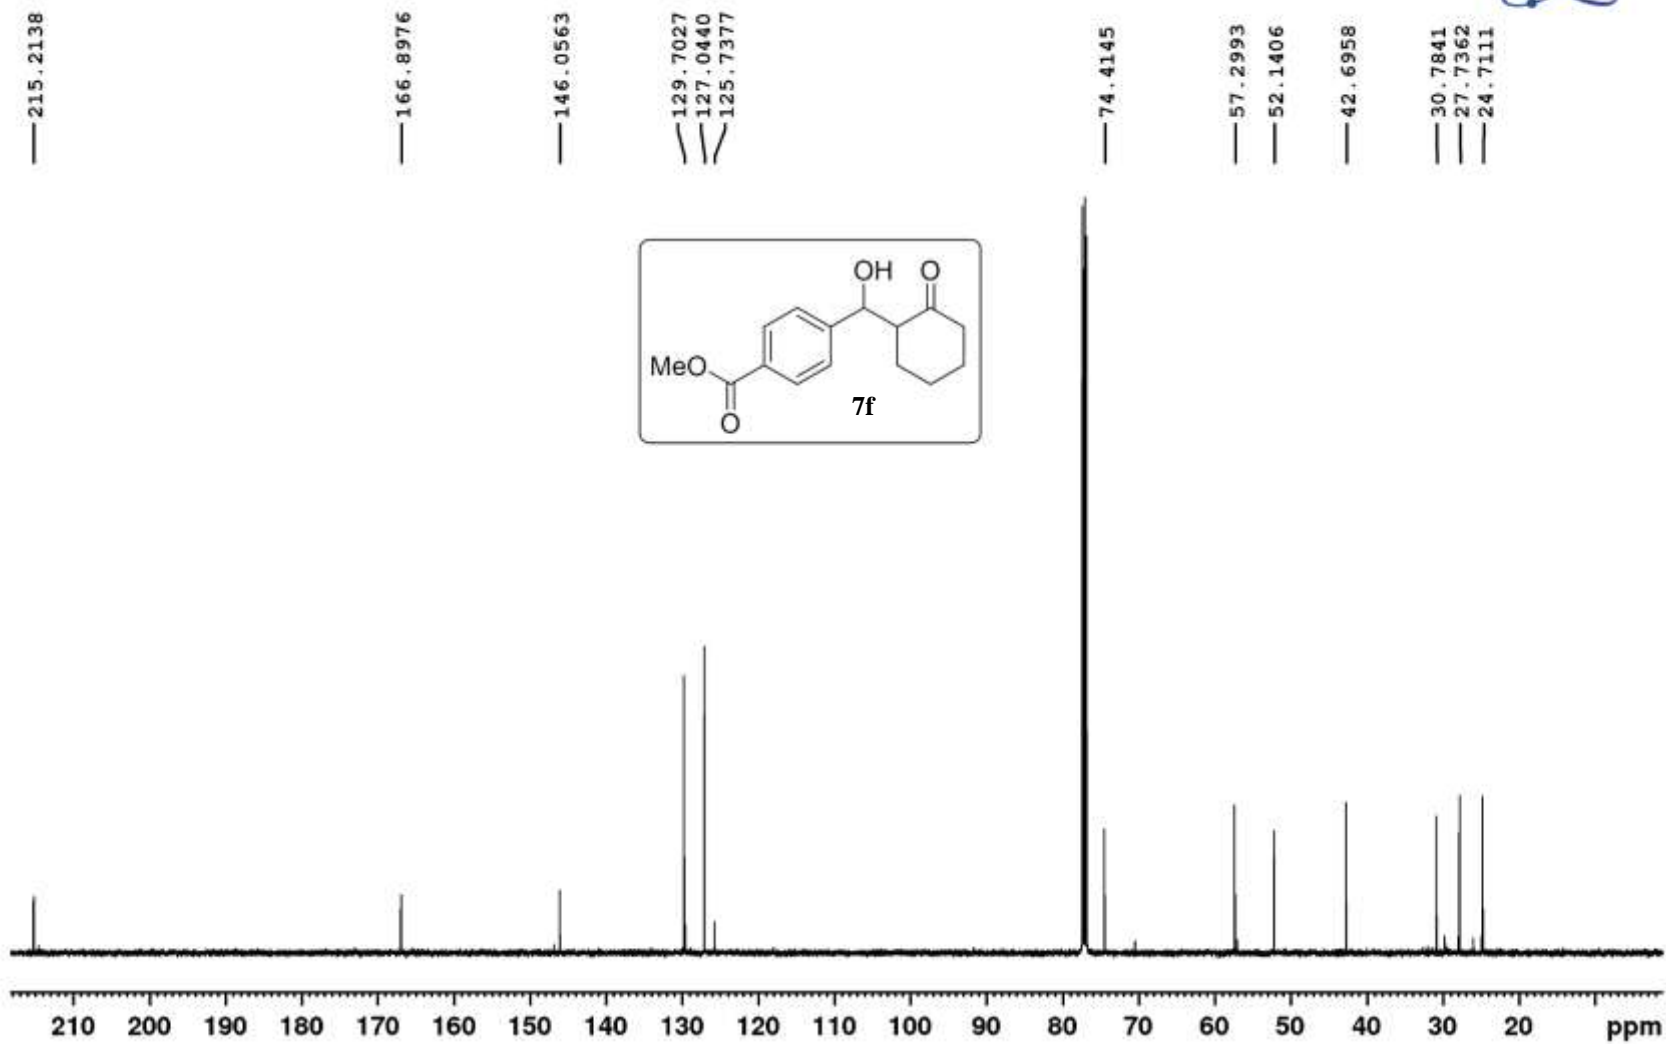

ES-KK-3PY-PDT; CDCl<sub>3</sub>; 12/01/19

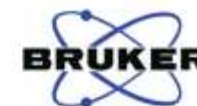

8.5475  
8.5447  
8.5384  
8.5354

7.7242  
7.7119  
7.7085  
7.3264  
7.3168  
7.3108  
7.3012  
7.2689

5.4263

4.8480  
4.8307

2.6468  
2.6210  
2.5930  
2.4828  
2.4796  
2.3991  
2.3871  
2.3728  
2.3601  
2.3453  
2.3329  
2.1232  
2.1172  
2.1107  
2.1037  
2.0968  
2.0907  
2.0848  
1.8319  
1.8292  
1.8053  
1.8026  
1.6870  
1.6795  
1.6720  
1.6610  
1.6533  
1.6460  
1.5958  
1.5874  
1.5701  
1.5432  
1.4199  
1.3830

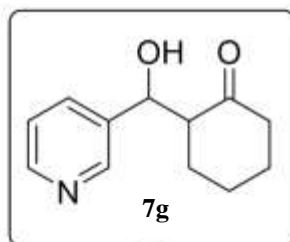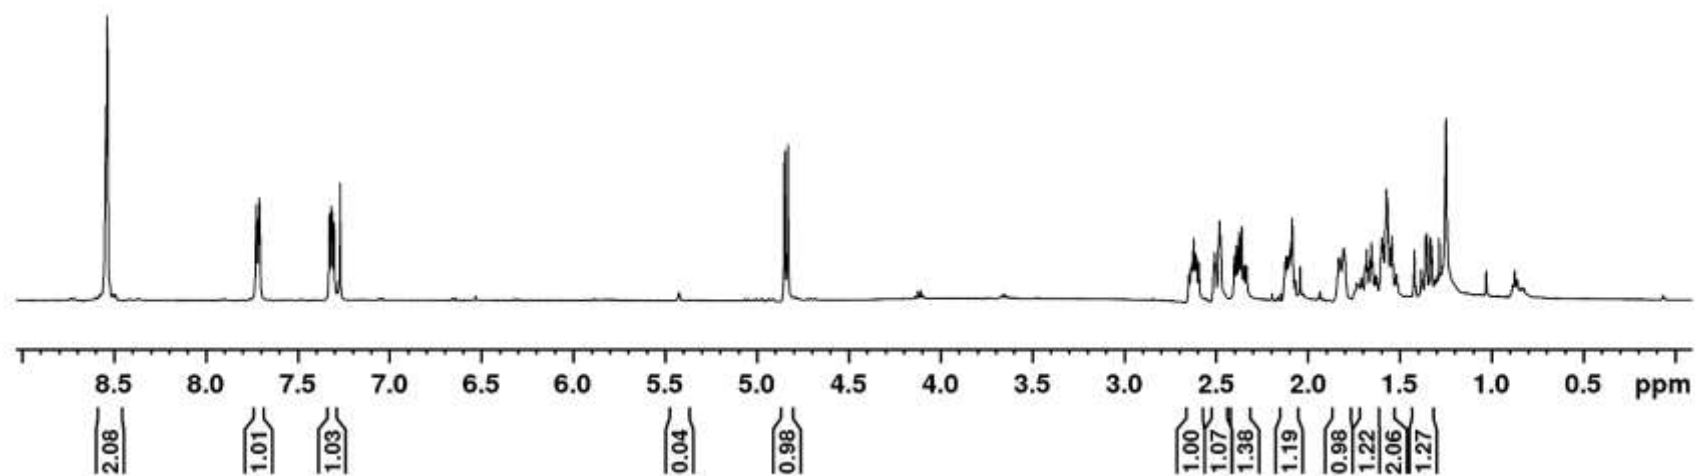



ES-KK-3PY-PDT; CDCl<sub>3</sub>; 12/01/19

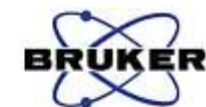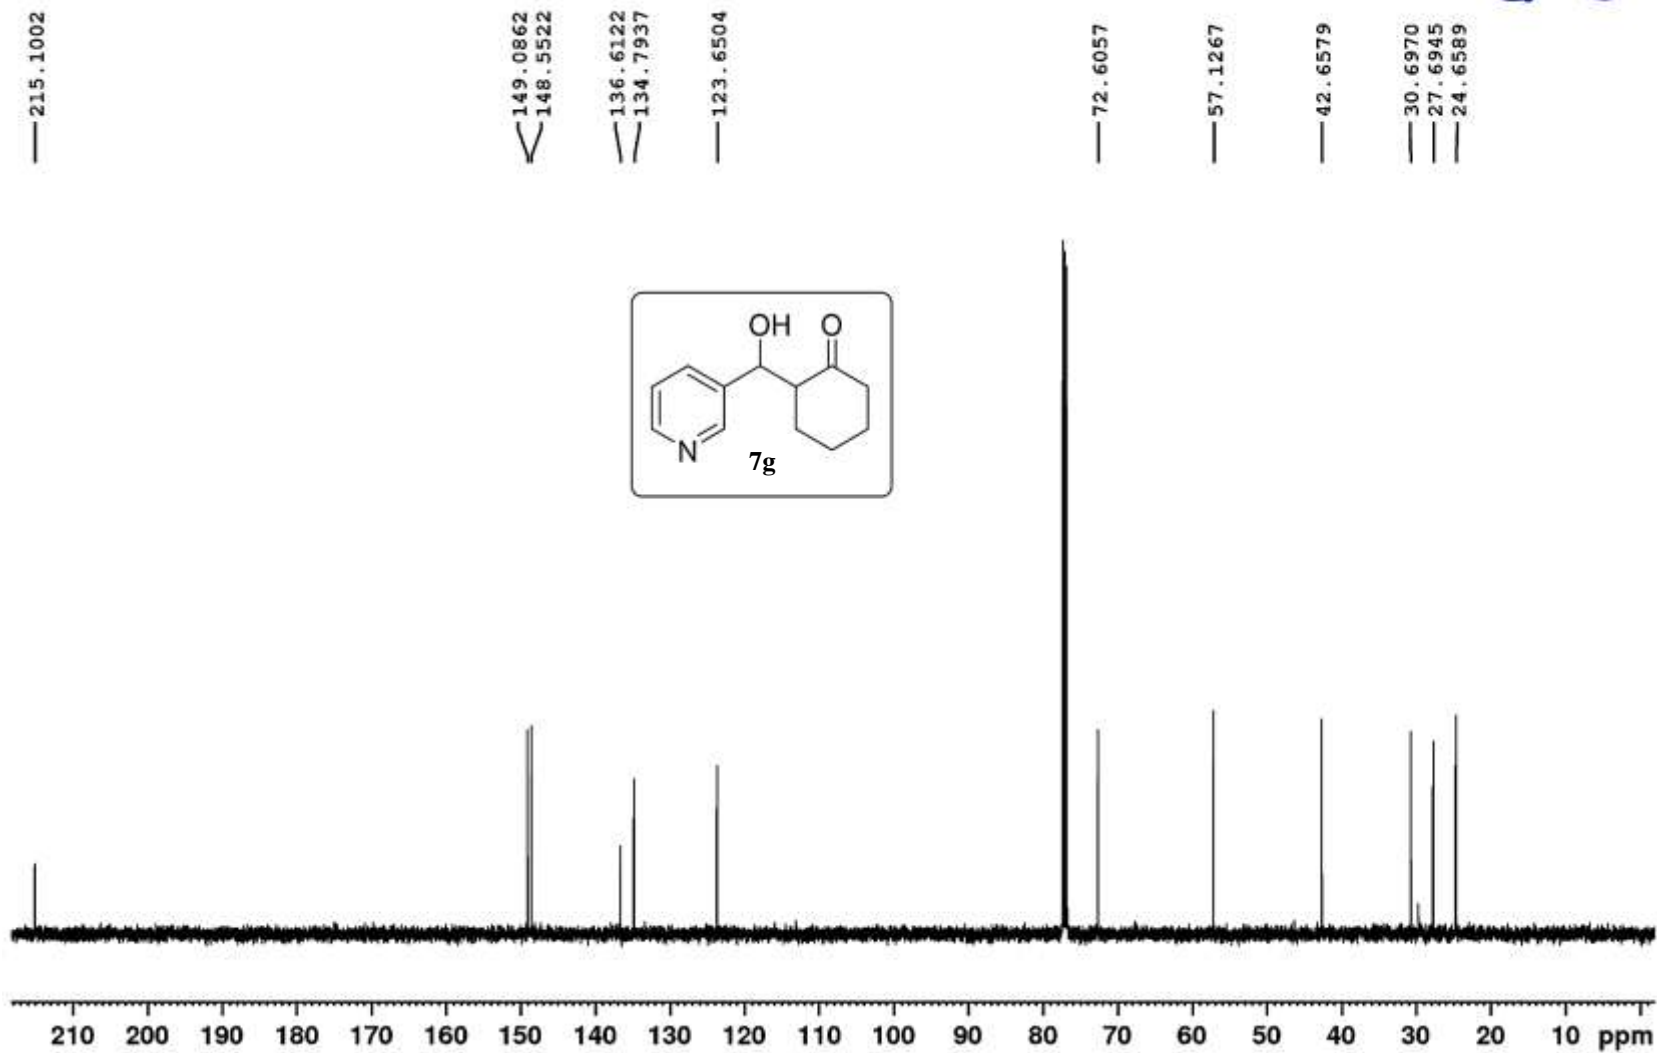

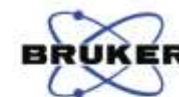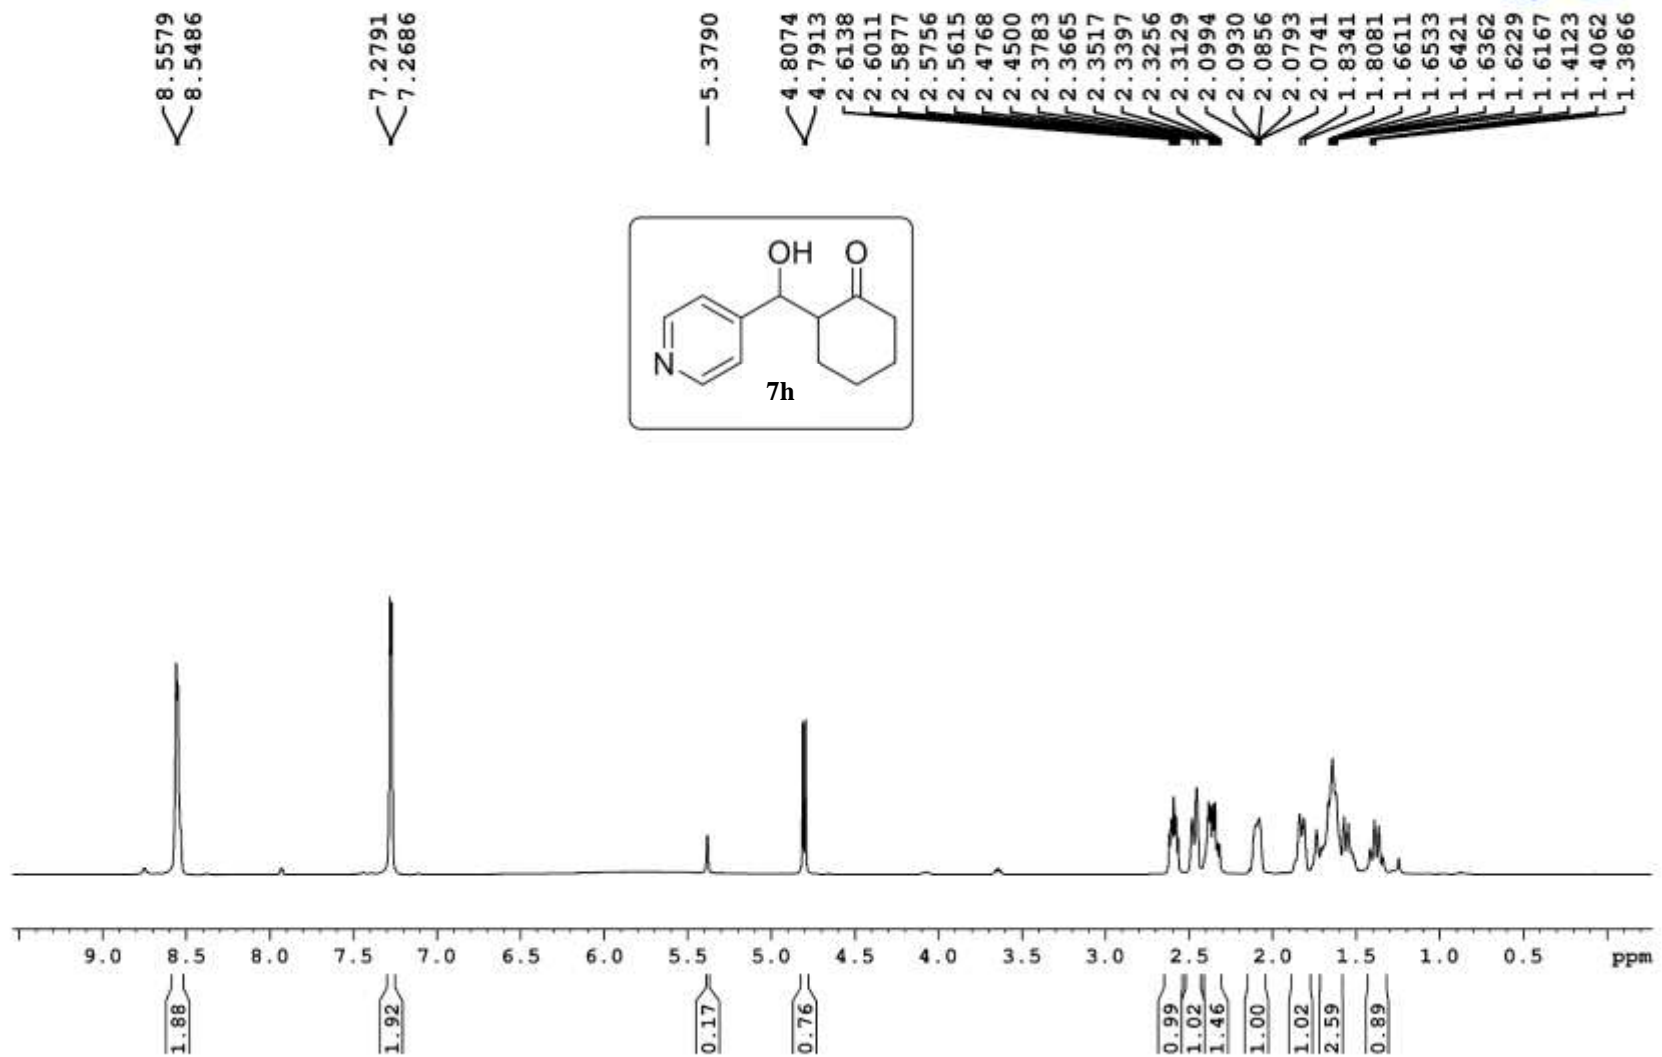

ES-KK-4PY-PDT; CDC13; 03/01/19

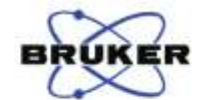

— 214.5284

< 149.3118  
149.0515

— 122.2010

— 73.3737

— 56.8958

— 42.6512

< 30.6945  
27.7048  
24.6732

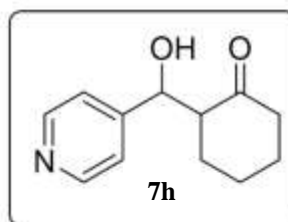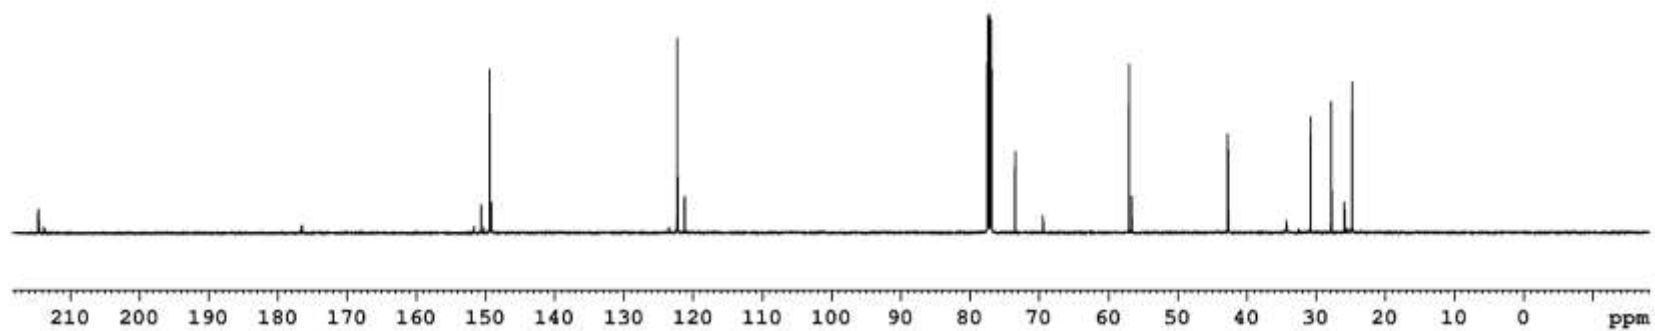

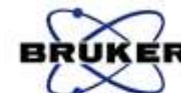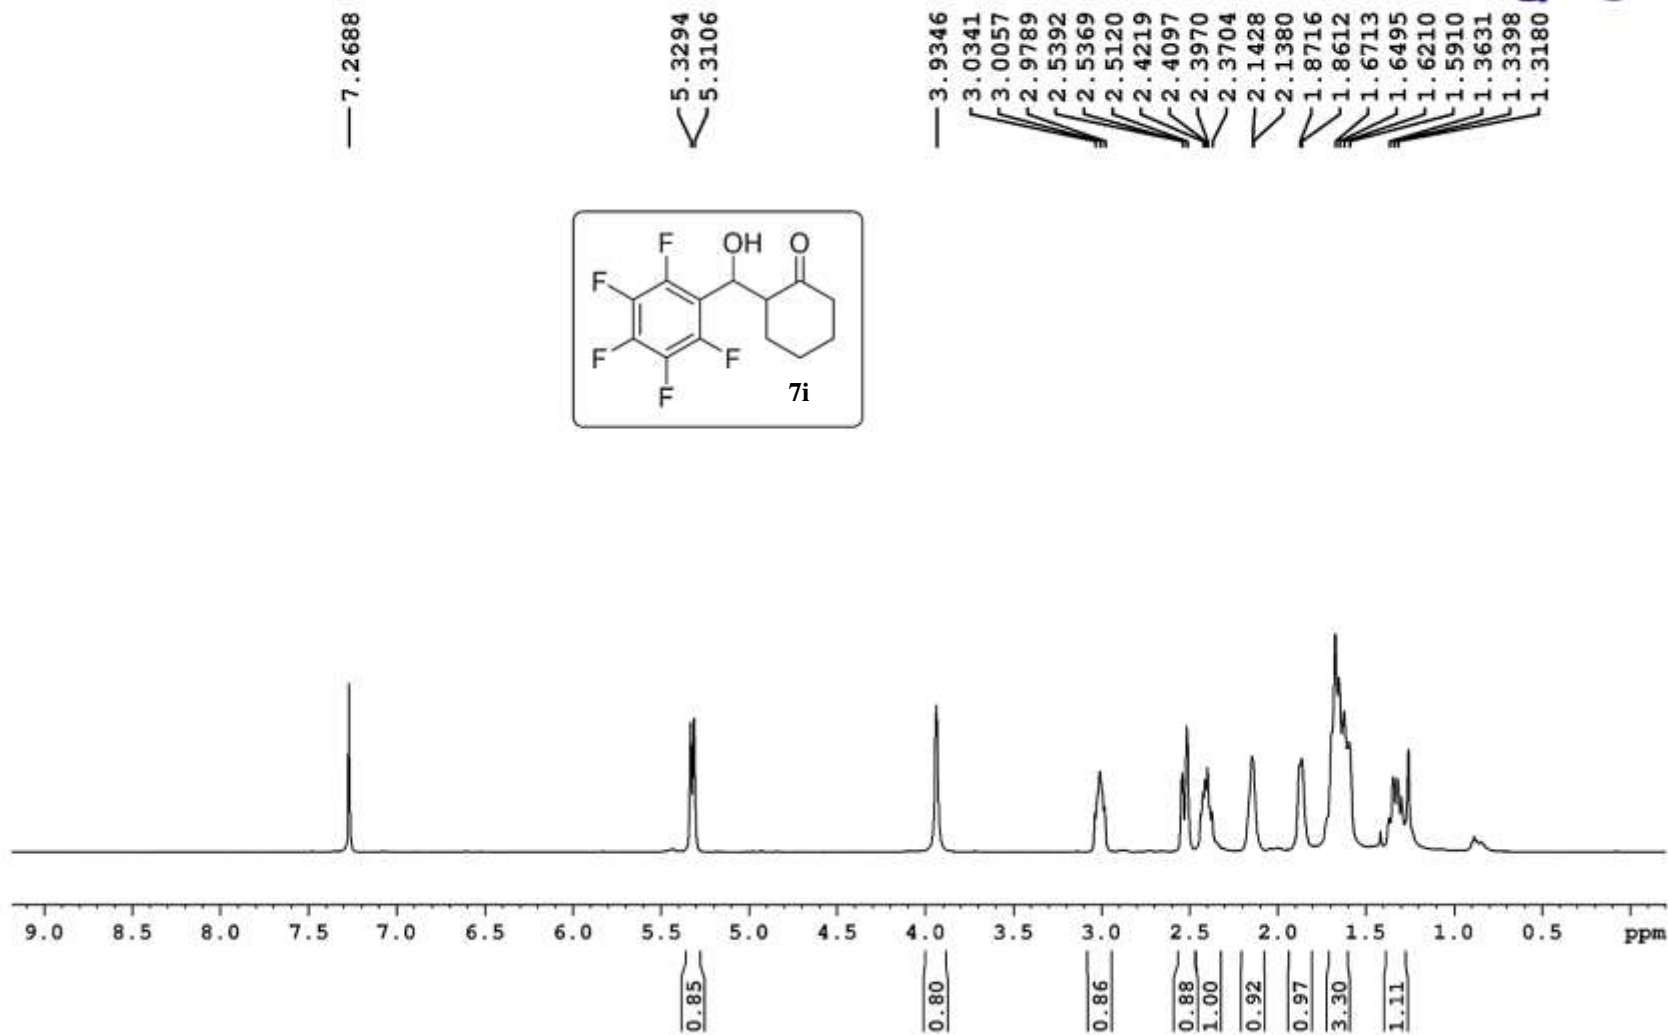

ES-KK-C6F5-PDT; CDCl3; 28/11/2018

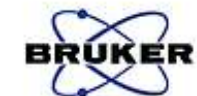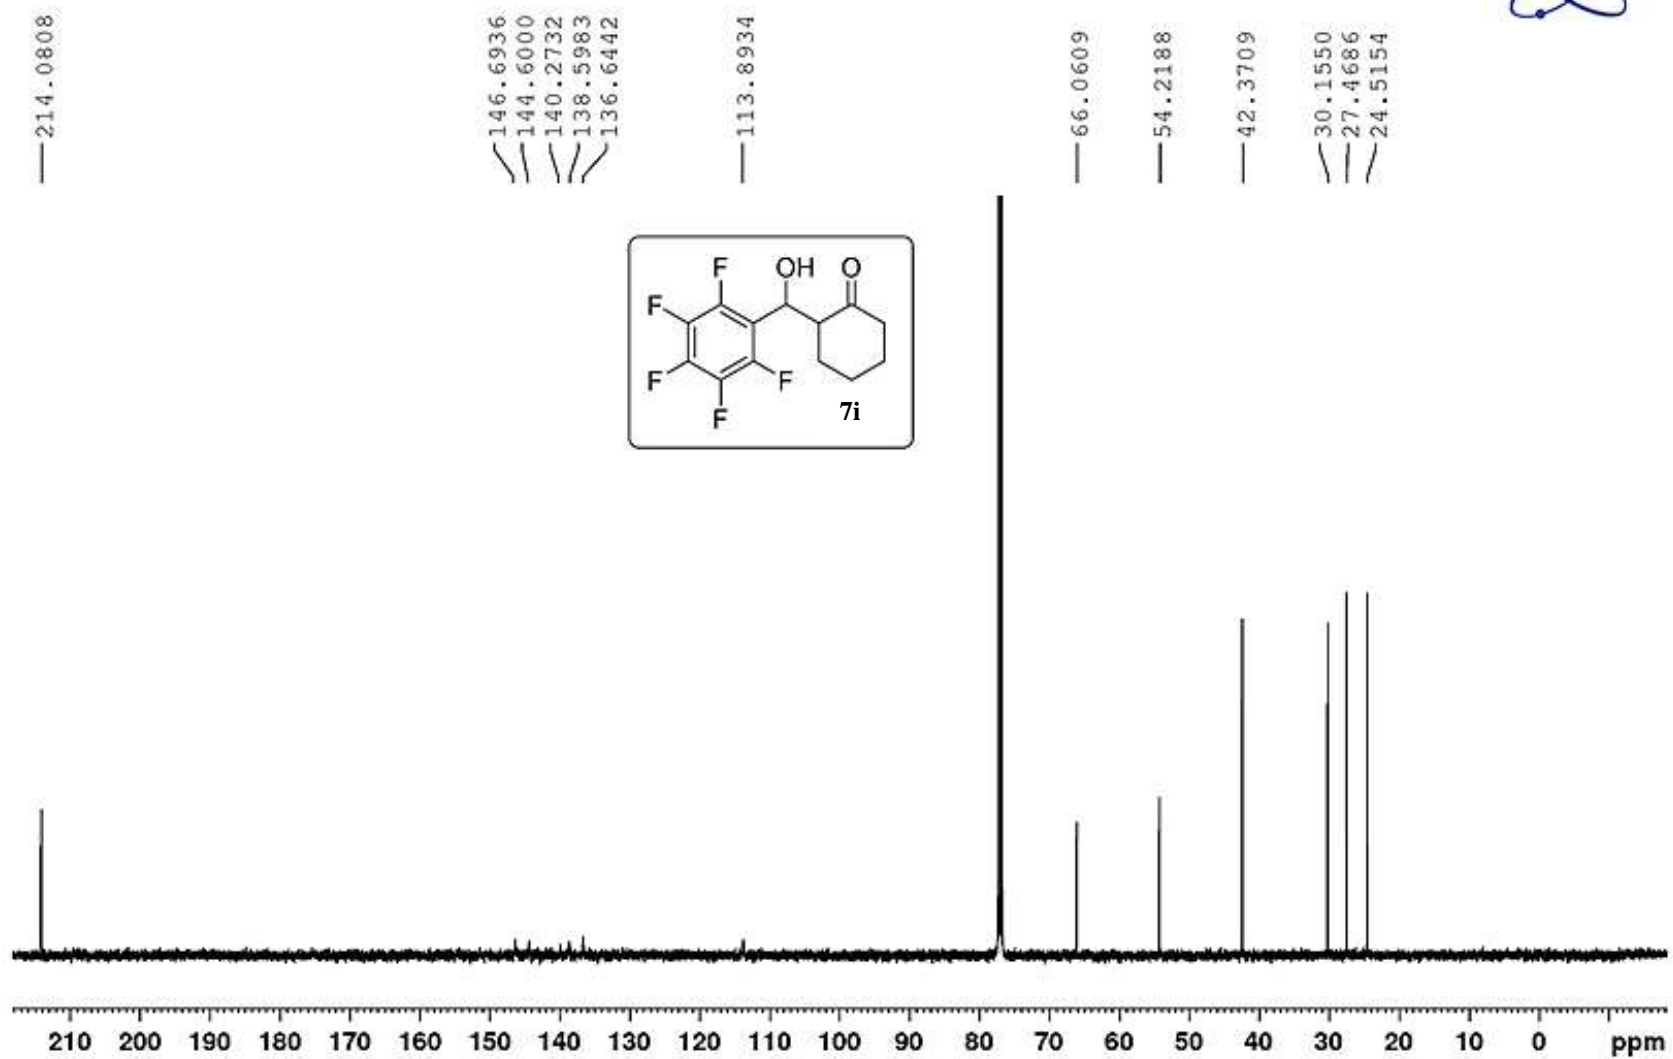

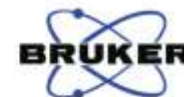

7.8503  
7.8341  
7.7752  
7.7595  
7.6477  
7.6329  
7.6178  
7.4429  
7.4271  
7.4121  
7.2690

5.9600

5.4538  
5.4397

3.8628  
2.7847  
2.7720  
2.7601  
2.7474  
2.7348  
2.4651  
2.4382  
2.3722  
2.3603  
2.3456  
2.3334  
2.3190  
2.3066  
2.1129  
2.1074  
2.1012  
2.0937  
2.0874  
2.0815  
1.8616  
1.8386  
1.7743  
1.7690  
1.7621  
1.7488  
1.7436  
1.7100  
1.7031  
1.6845

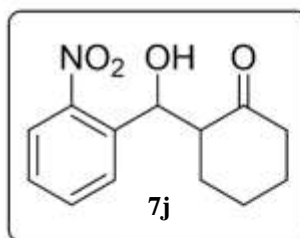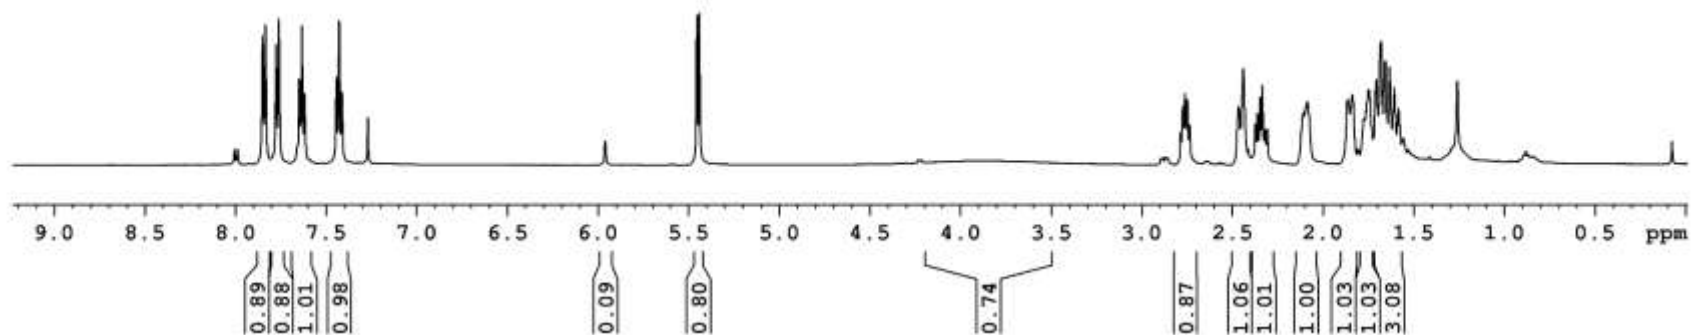

ES-KK-o-NO2-PDT; CDC13; 01/05/18

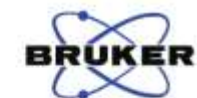

— 214.8735

— 148.7752

— 136.6175

— 133.0475

— 129.0289

— 128.3959

— 124.0661

— 69.7693

— 57.3194

— 42.8184

— 31.1115

— 27.7565

— 24.9785

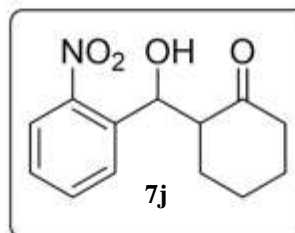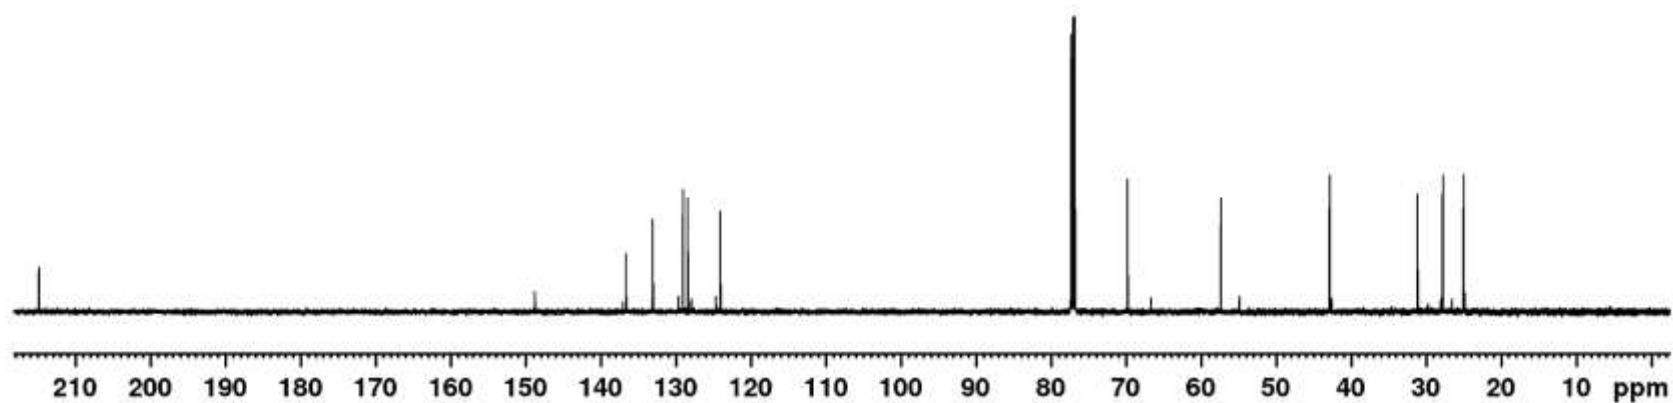

ES-KK-2-Cl-PDT;CDCl3;21/11/18

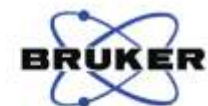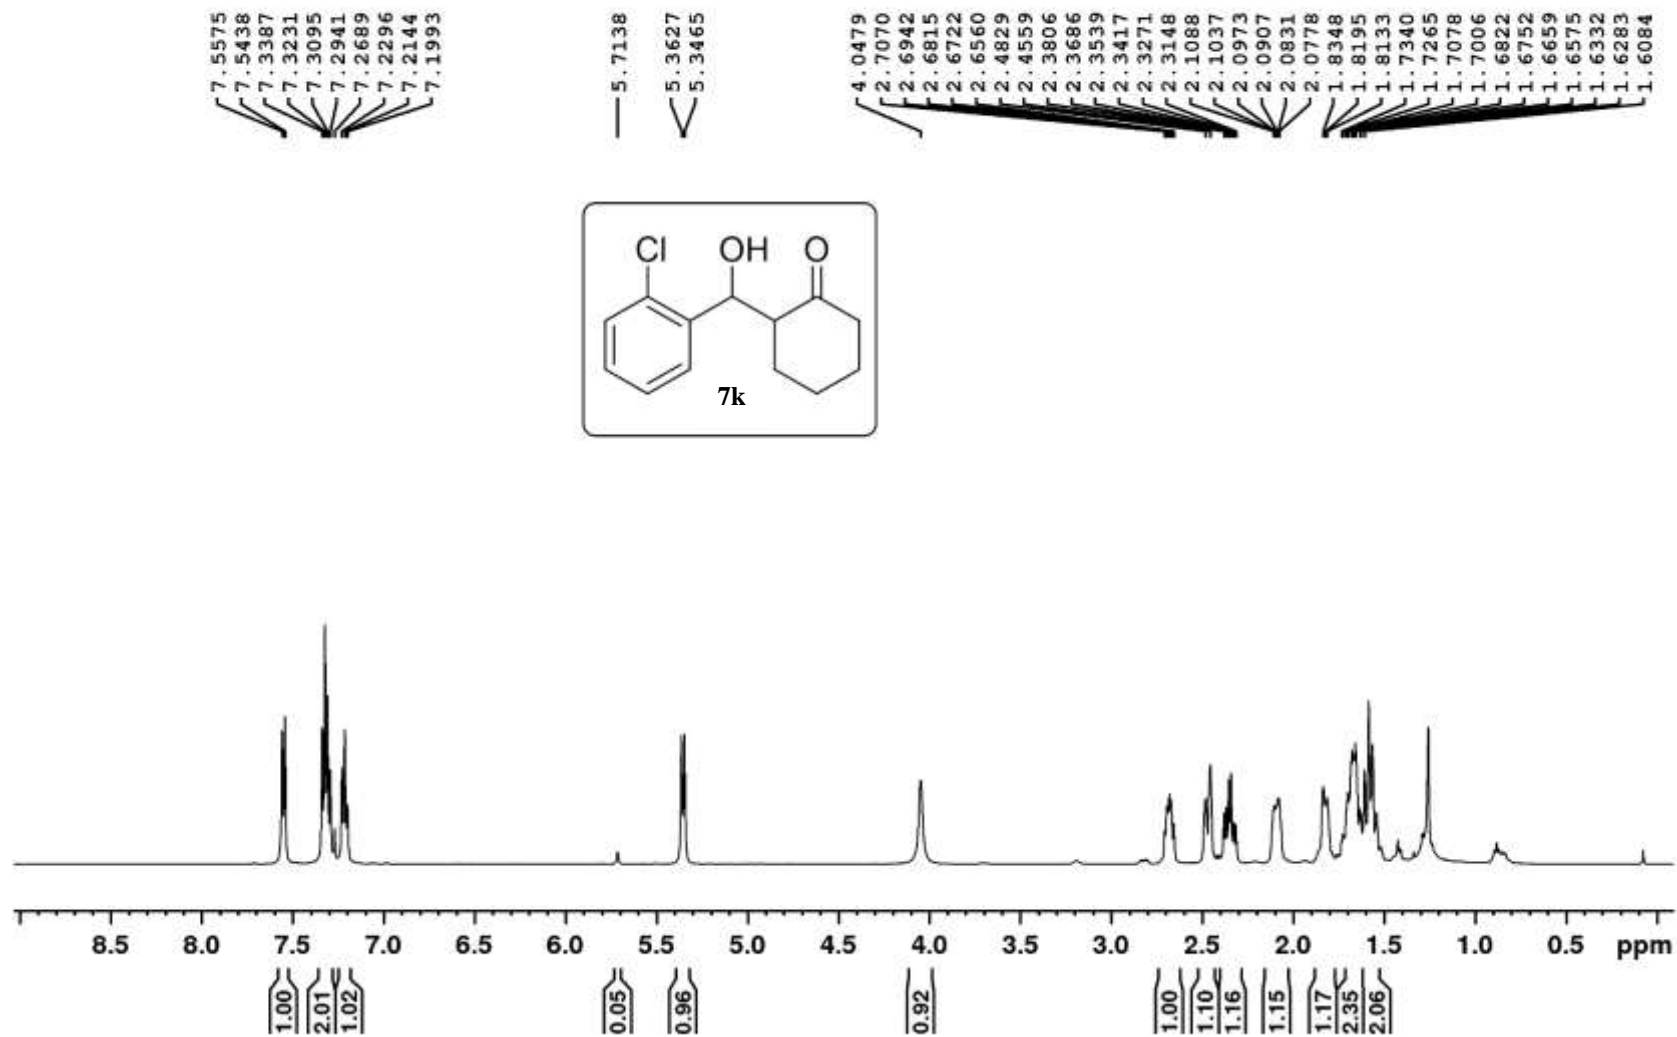



ES-KK-2-Cl-PDT; CDC13; 21/11/18

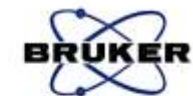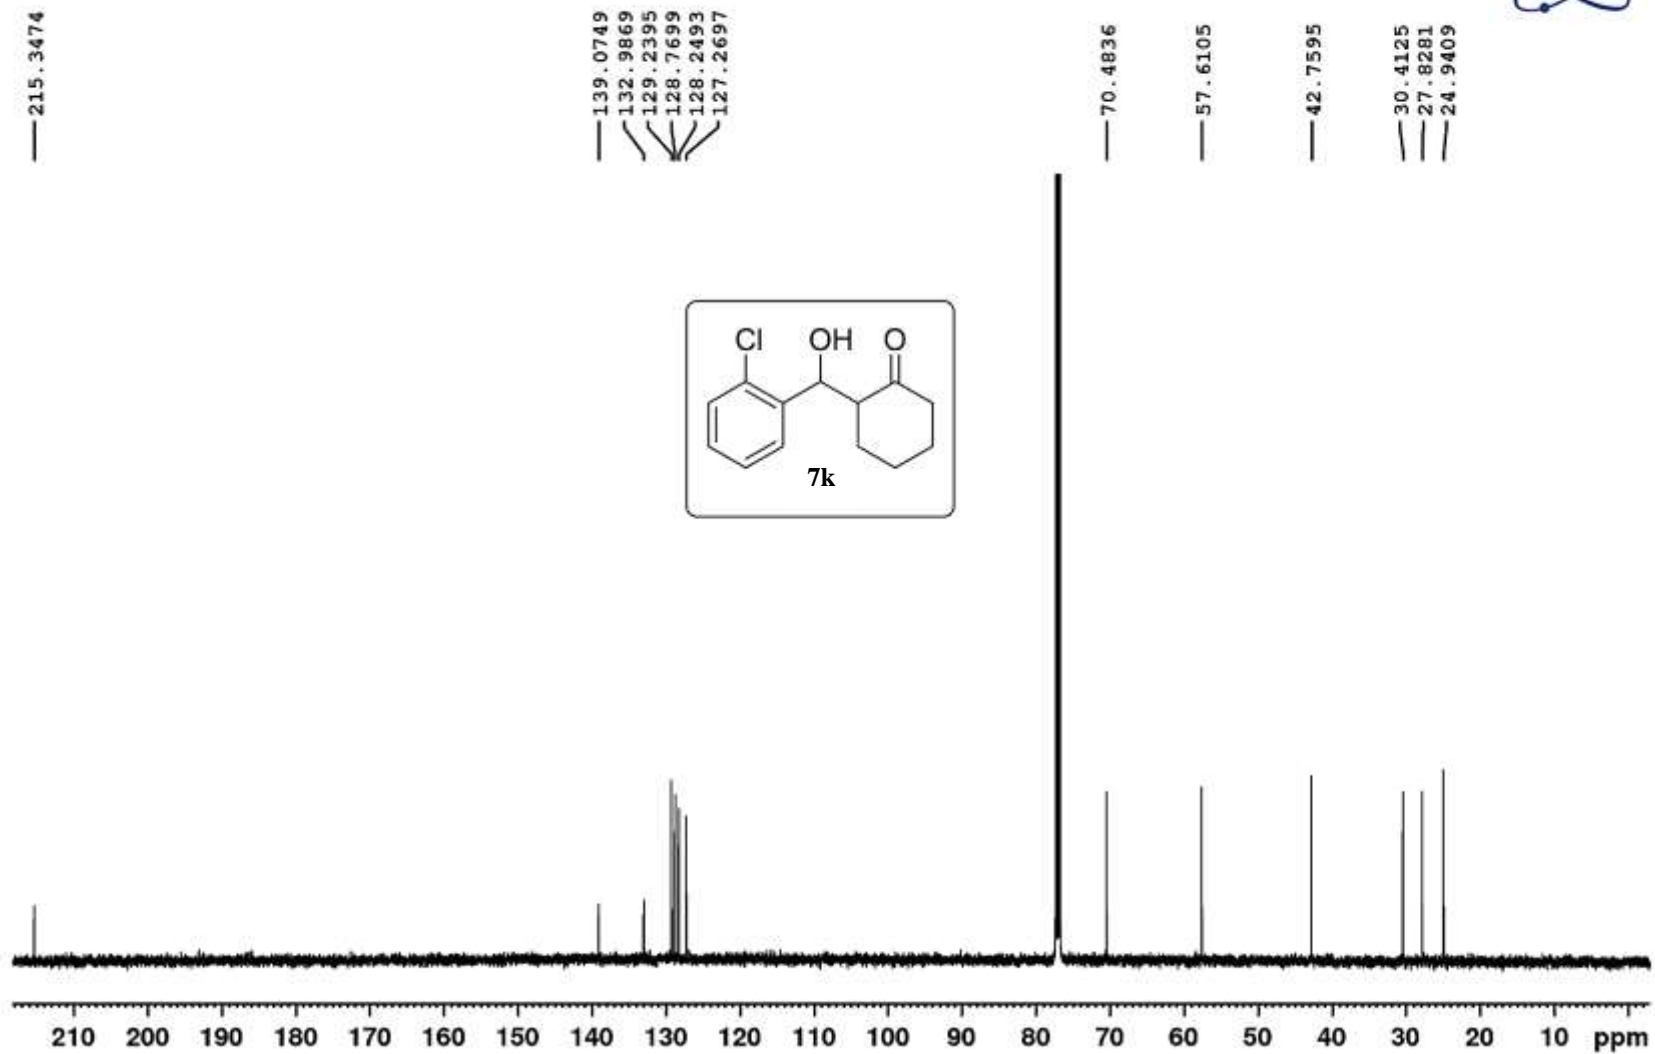

ES-KK-3-NO2-PDT; CDC13; 18/10/20

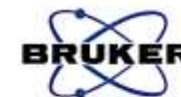

8.2169  
8.1784  
8.1621  
7.6845  
7.6693  
7.5524  
7.5365  
7.5208  
7.2687

5.4867  
4.9099  
4.8929

4.1505  
2.6549  
2.6442  
2.6377  
2.6286  
2.6179  
2.6134  
2.6021  
2.5234  
2.4960  
2.4141  
2.4025  
2.3874  
2.3750  
2.3599  
2.3479  
2.1446  
2.1386  
2.1321  
2.1252  
2.1183  
2.1123  
2.1064  
1.8507  
1.8234  
1.6928  
1.6852  
1.6739  
1.6667  
1.6595  
1.6416  
1.4294  
1.4095  
1.4024  
1.3834  
1.3758

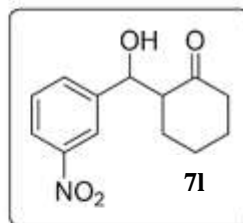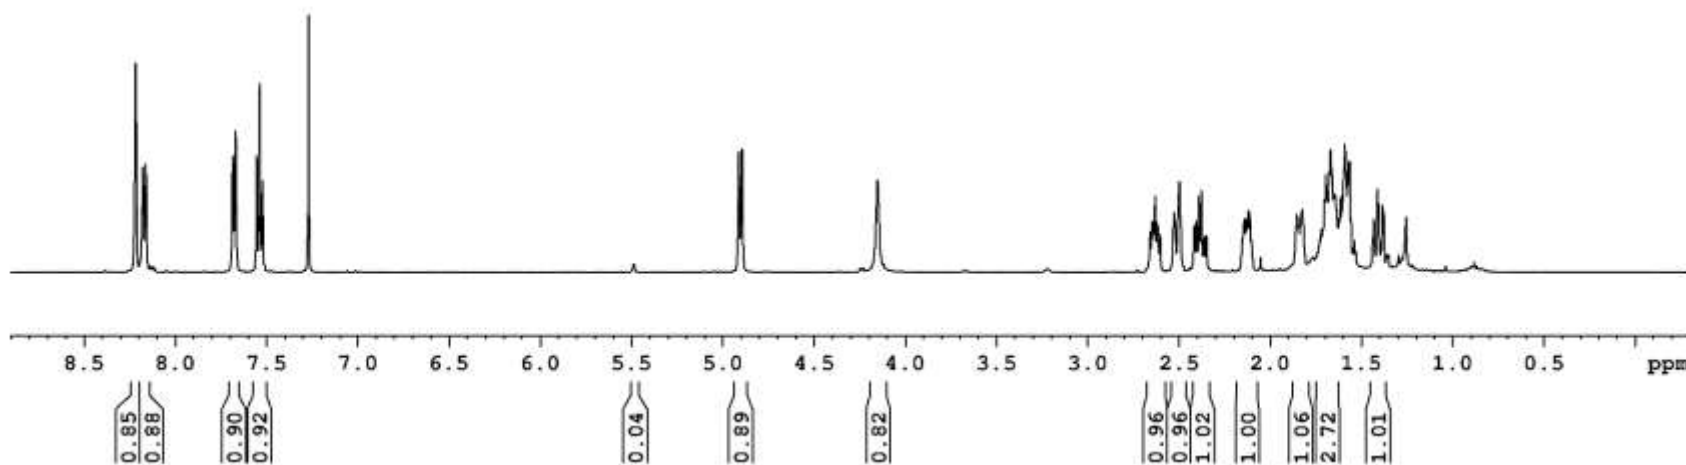

ES-KK-3-NO2-PDT; CDC13; 18/10/20

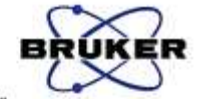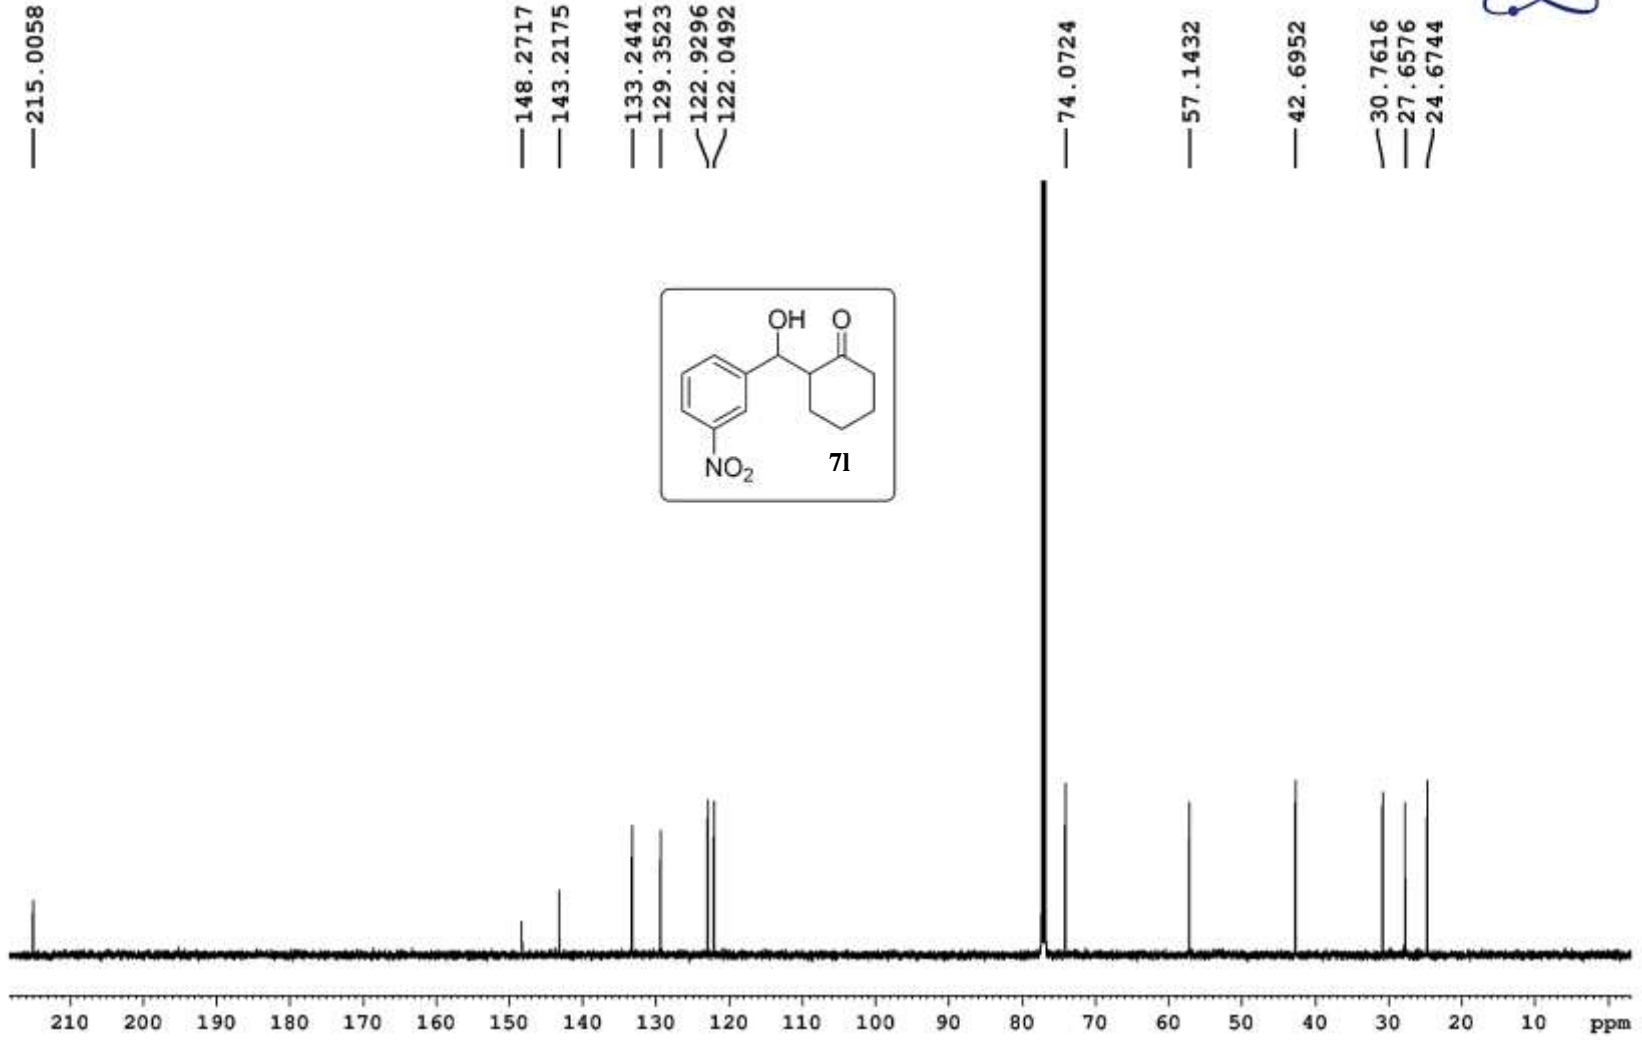

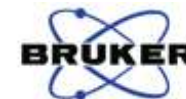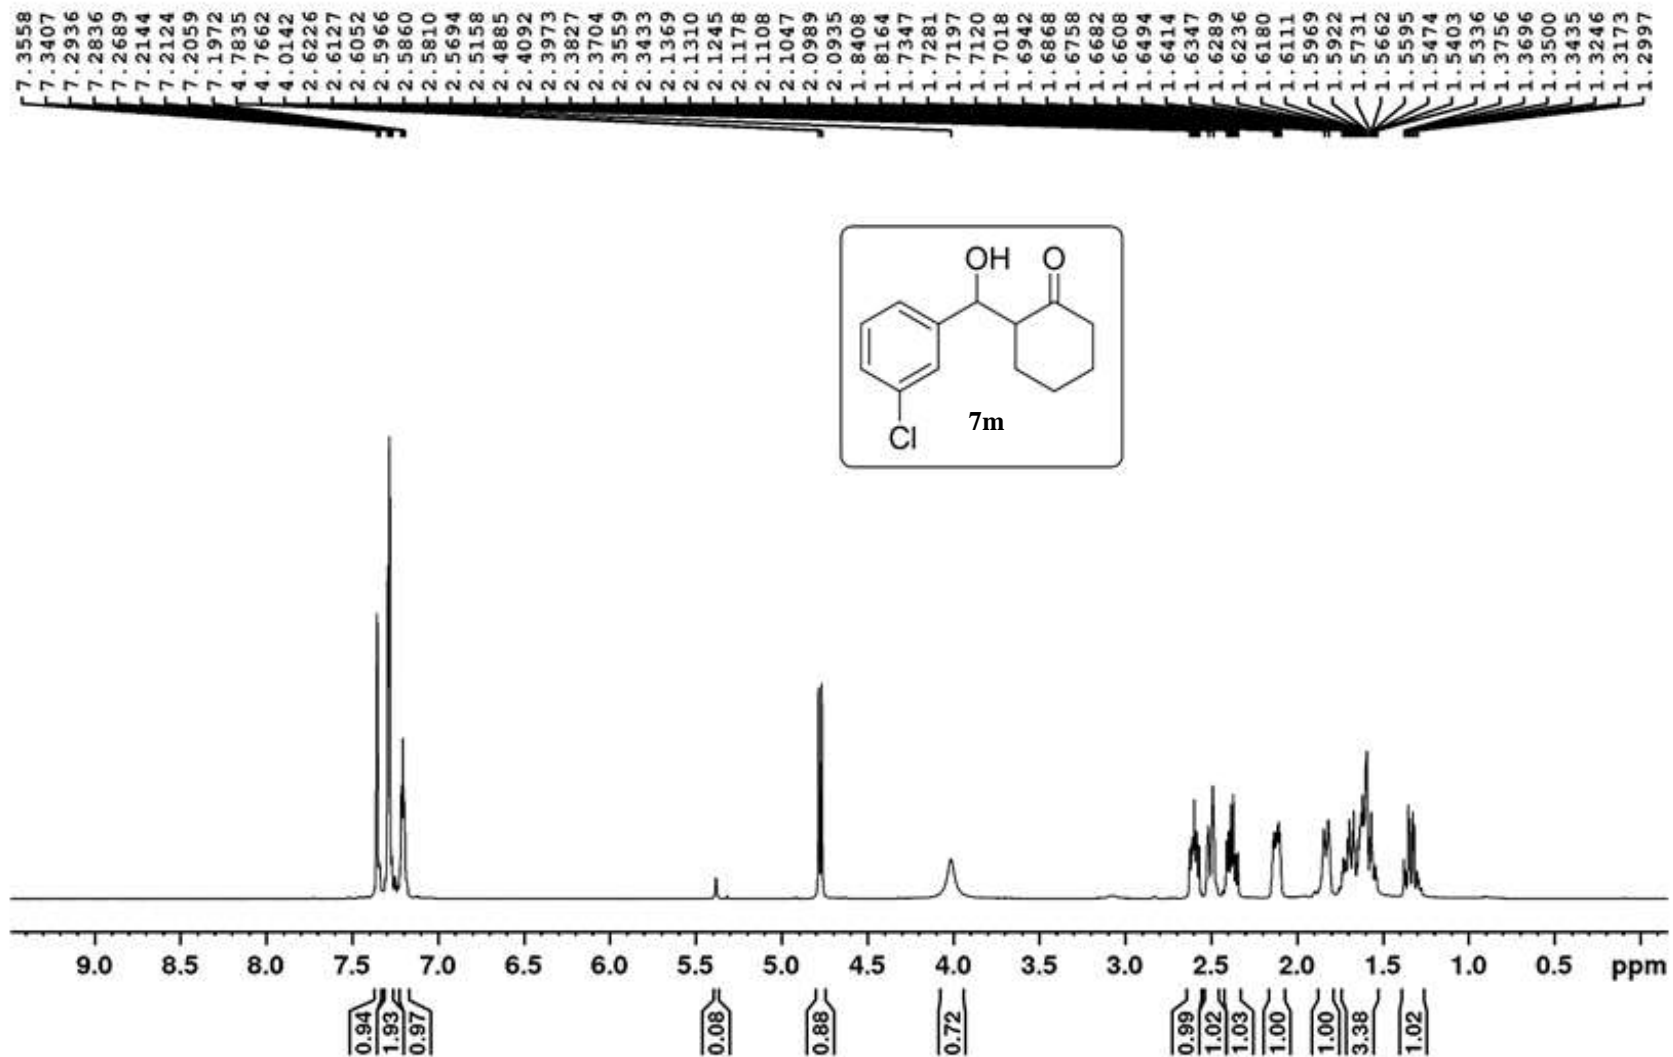

ES-KK-3-C1-PDT; CDC13; 30/11/18

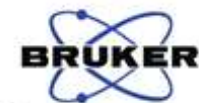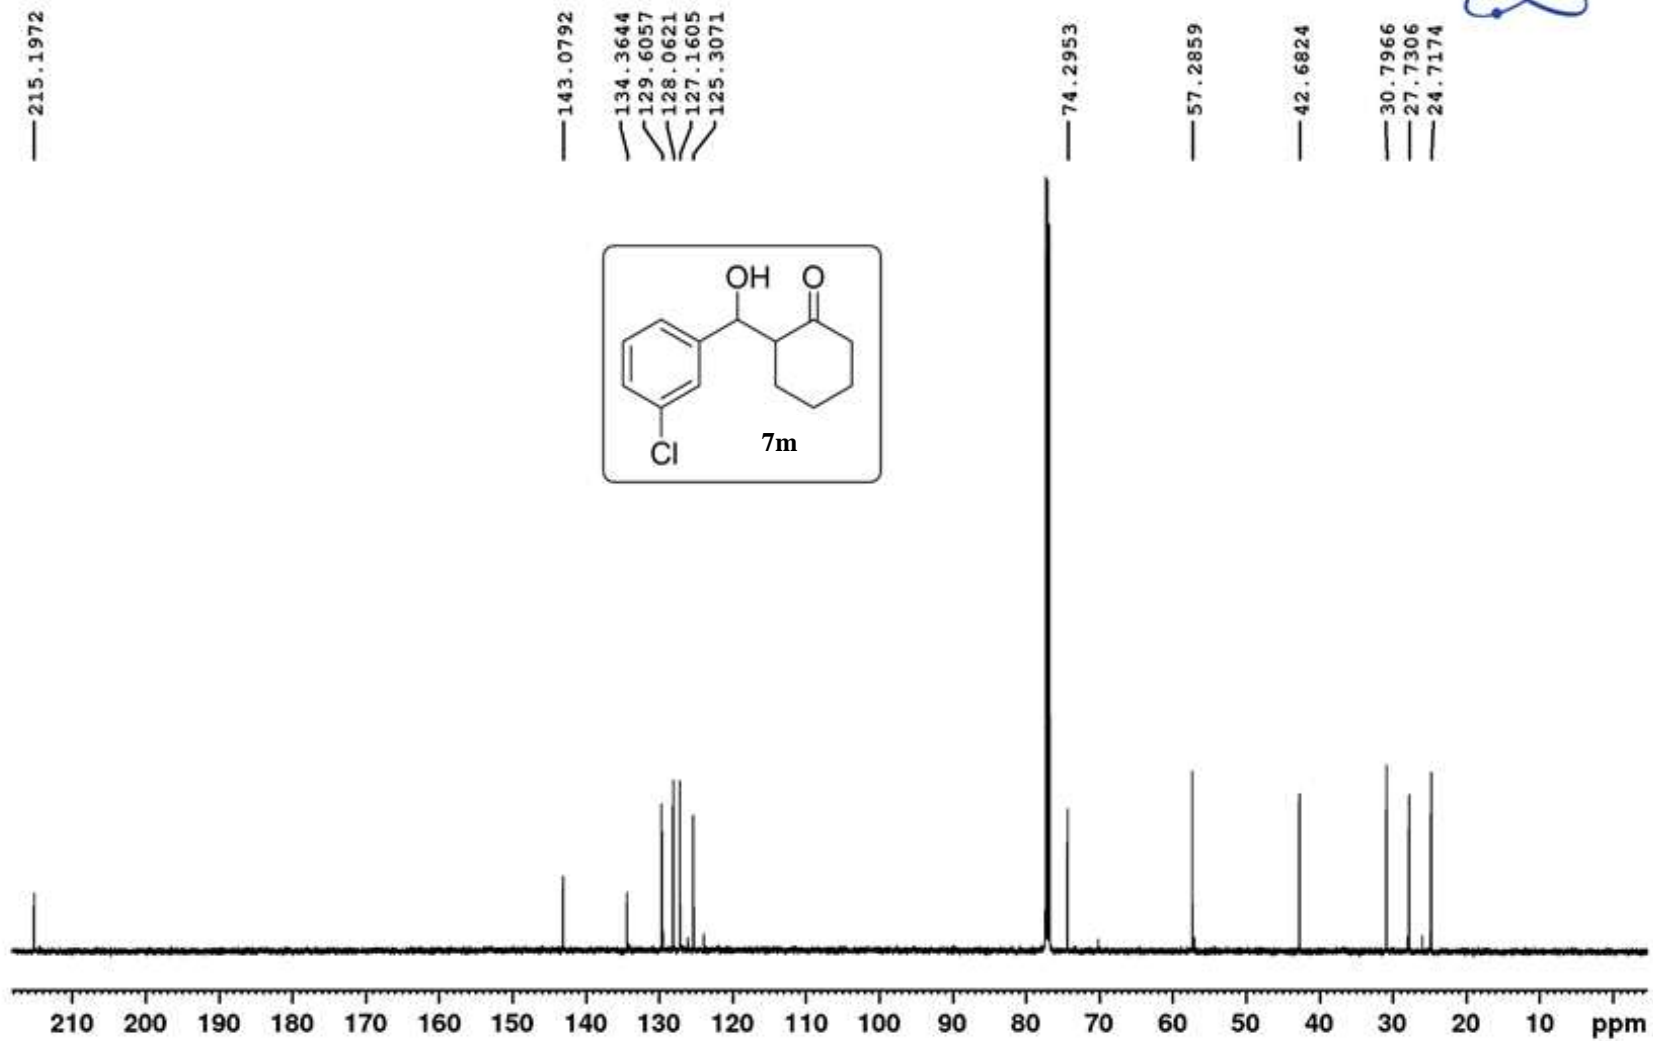

ES-KK-3-OC6H5-PDT, CDCl3, 18/7/19

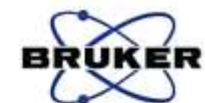

7.3550  
7.3527  
7.3381  
7.3231  
7.3152  
7.3069  
7.2992  
7.2911  
7.2834  
7.2689  
7.1229  
7.1162  
7.1082  
7.1016  
7.0934  
7.0809  
7.0653  
7.0583  
7.0420  
7.0245  
7.0165  
7.0027  
6.9403  
6.9367  
6.9241  
6.9205  
5.3754  
4.7738  
4.7564  
2.6089  
2.6043  
2.5940  
2.5844  
2.5795  
2.4665  
2.3777  
2.3632  
2.3504  
2.1085  
2.1021  
2.0954  
2.0886  
2.0824  
2.0766  
1.8041  
1.7640  
1.7137  
1.7065  
1.6872  
1.6801  
1.6725  
1.6528  
1.6465  
1.6403  
1.6305  
1.6257  
1.6199  
1.6137  
1.6053  
1.5871  
1.5803  
1.5738  
1.5617  
1.5546  
1.5476  
1.3287  
1.3030  
1.2961  
1.2701

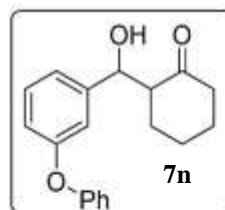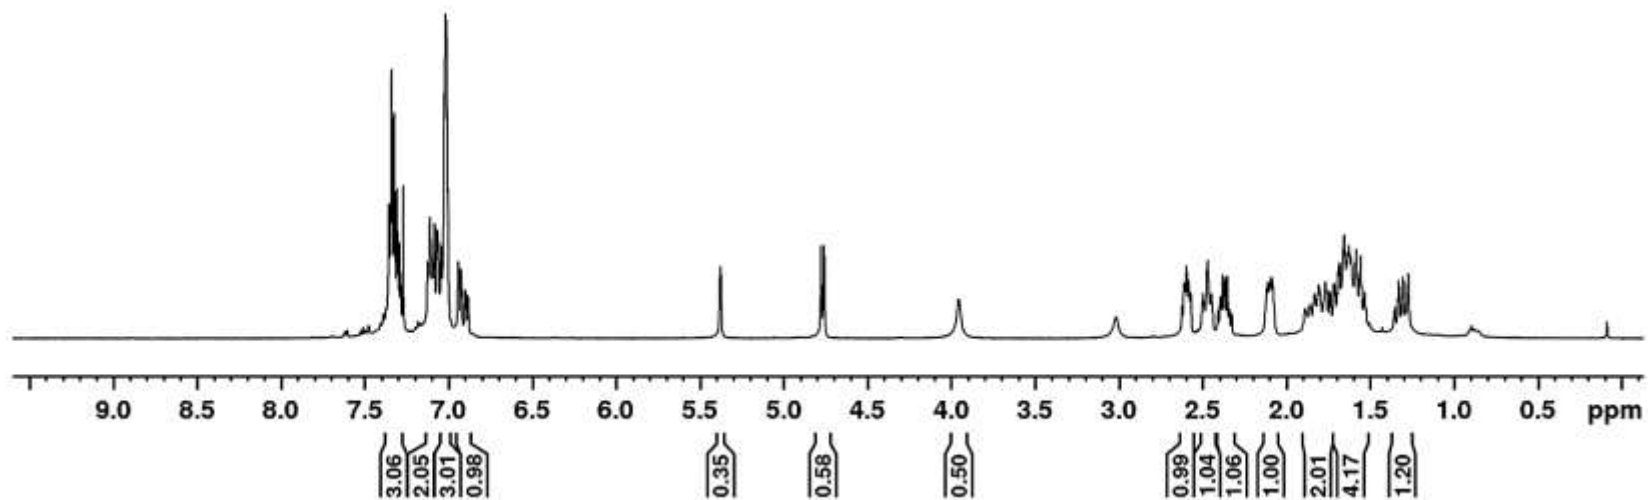

ES-KK-3-OC6H5-PDT; CDCl<sub>3</sub>; 18/07/19

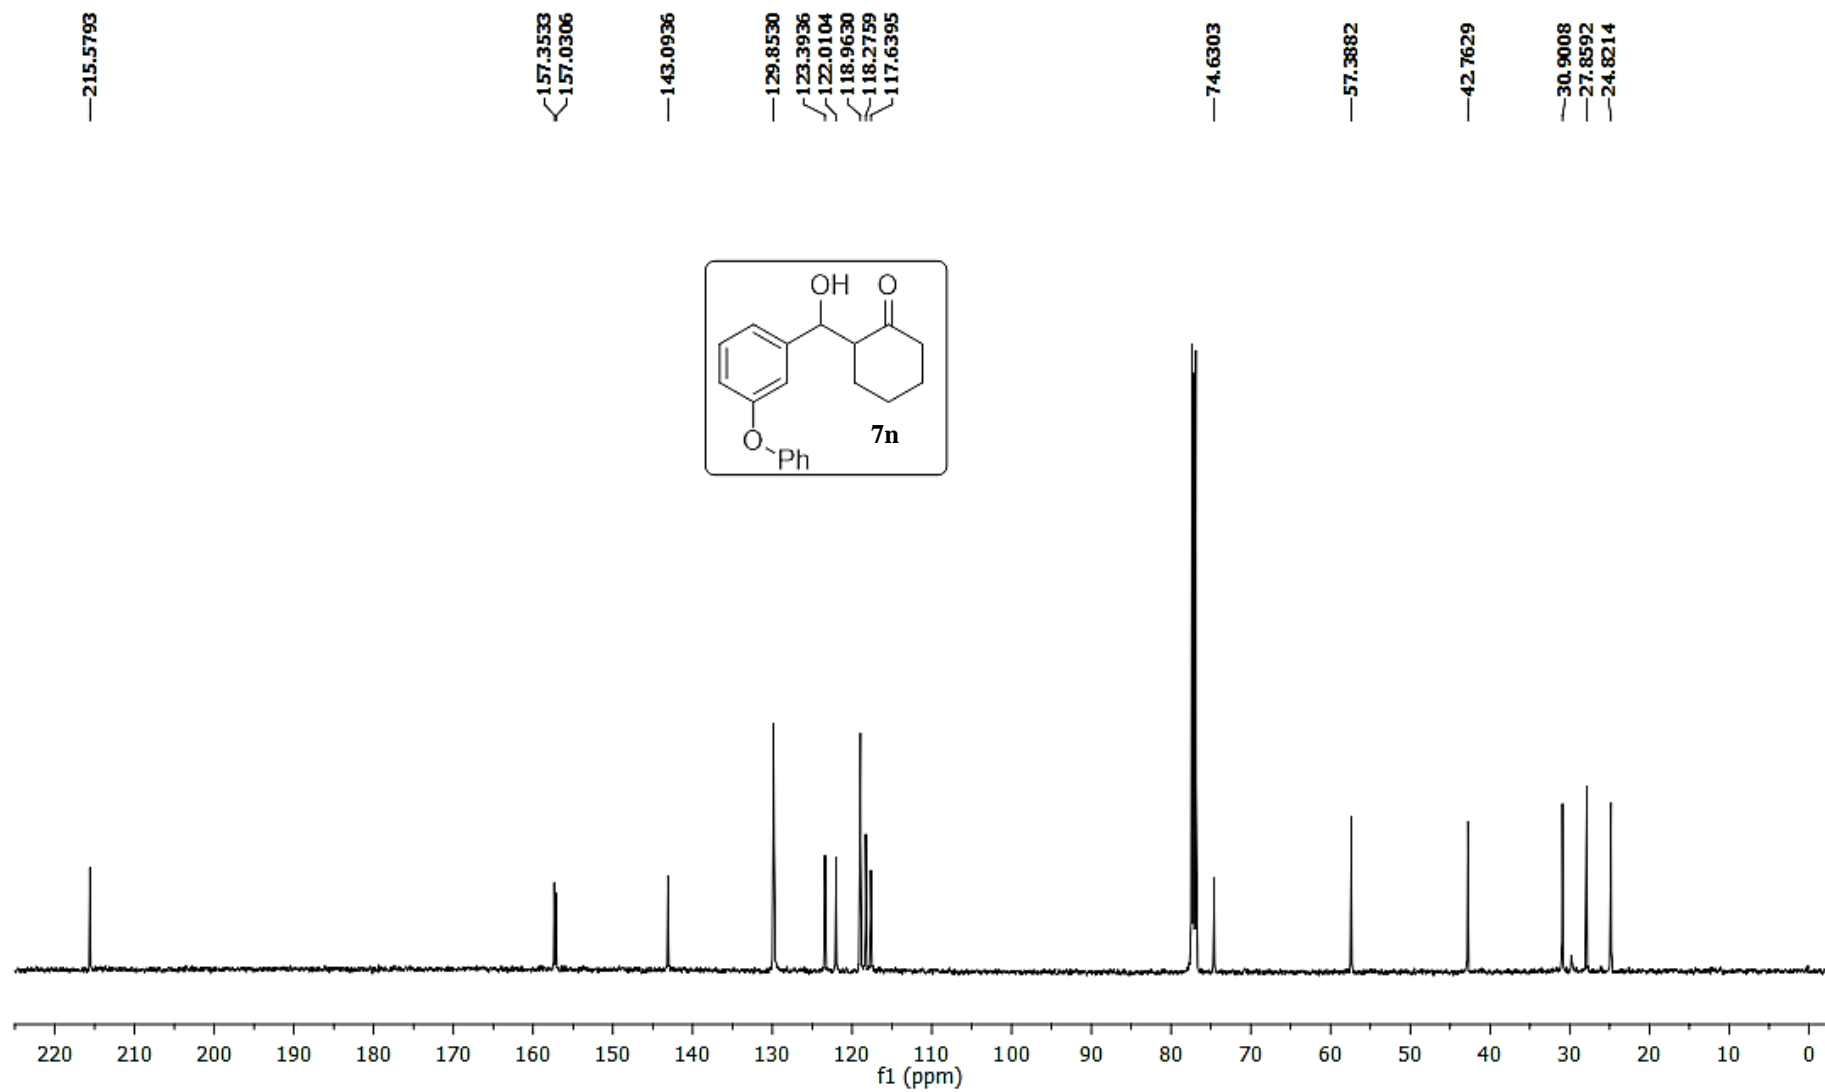

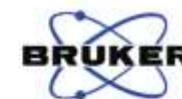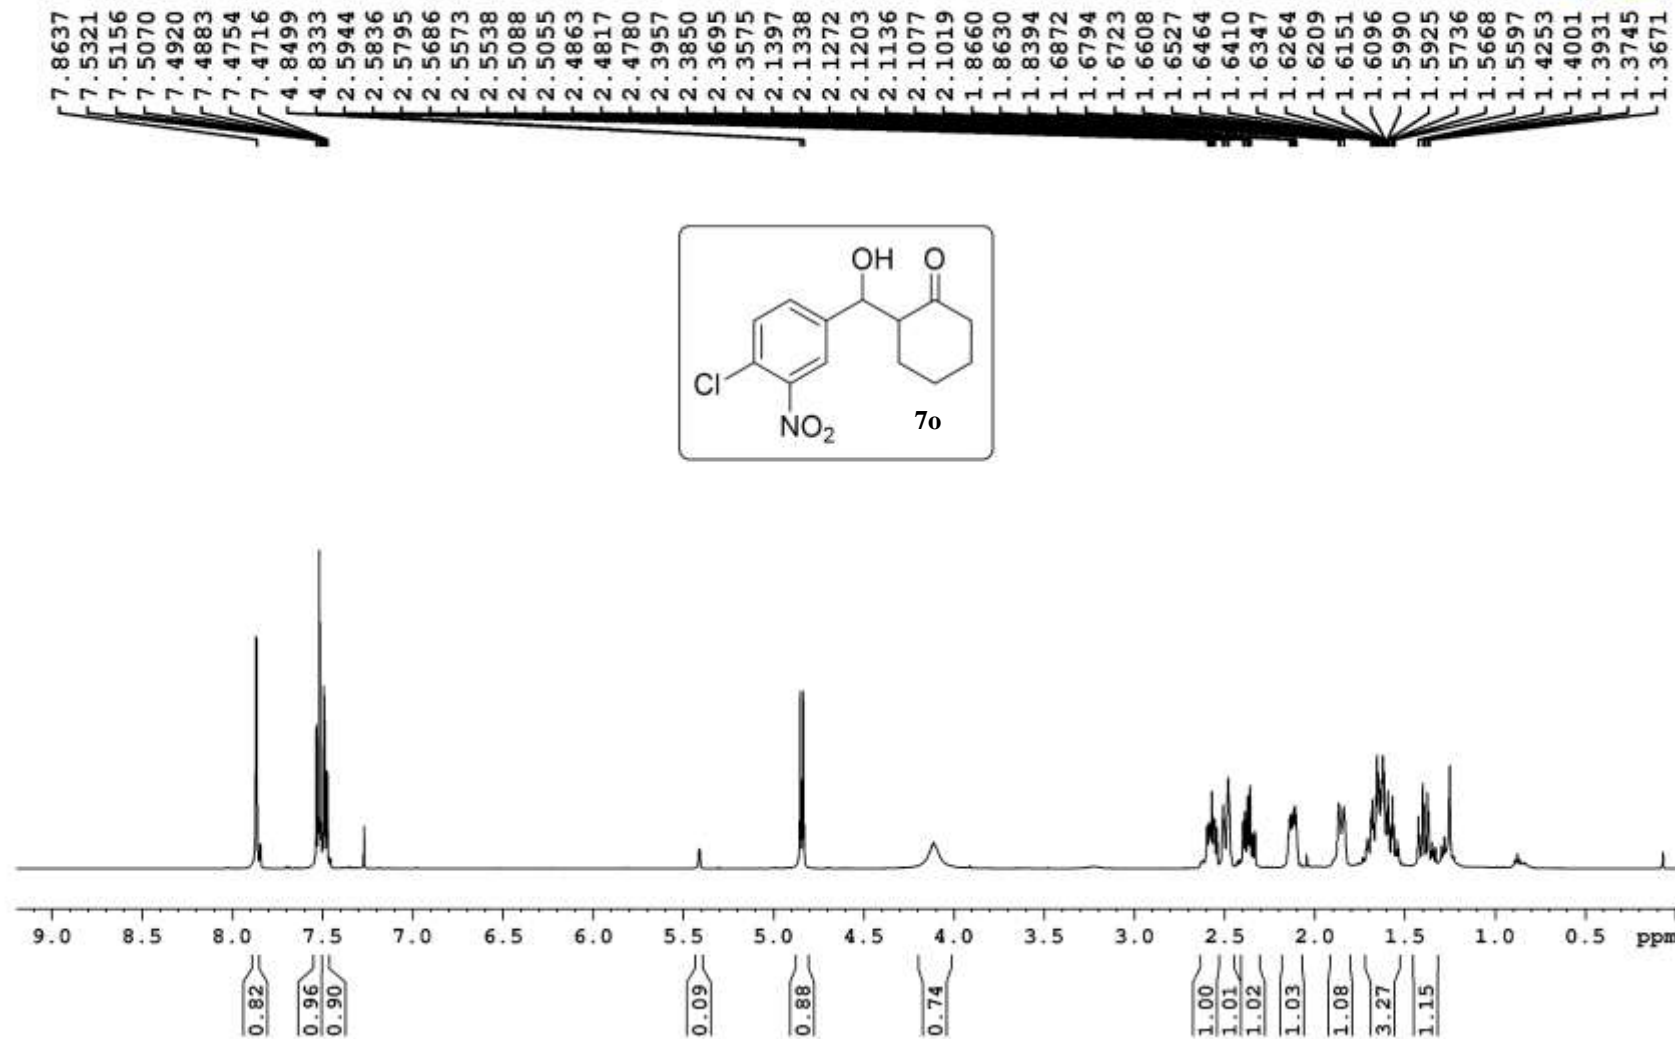



ES-KK-4Cl-3NO2-PDT; CDC13; 01/11/18

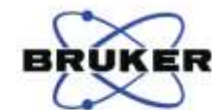

— 214.6796  
— 147.8090  
— 141.7833  
— 131.7212  
— 131.6939  
— 126.1771  
— 124.0840  
— 73.4307  
— 57.0509  
— 42.6567  
— 30.6879  
— 27.6009  
— 24.6460

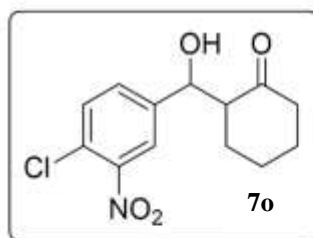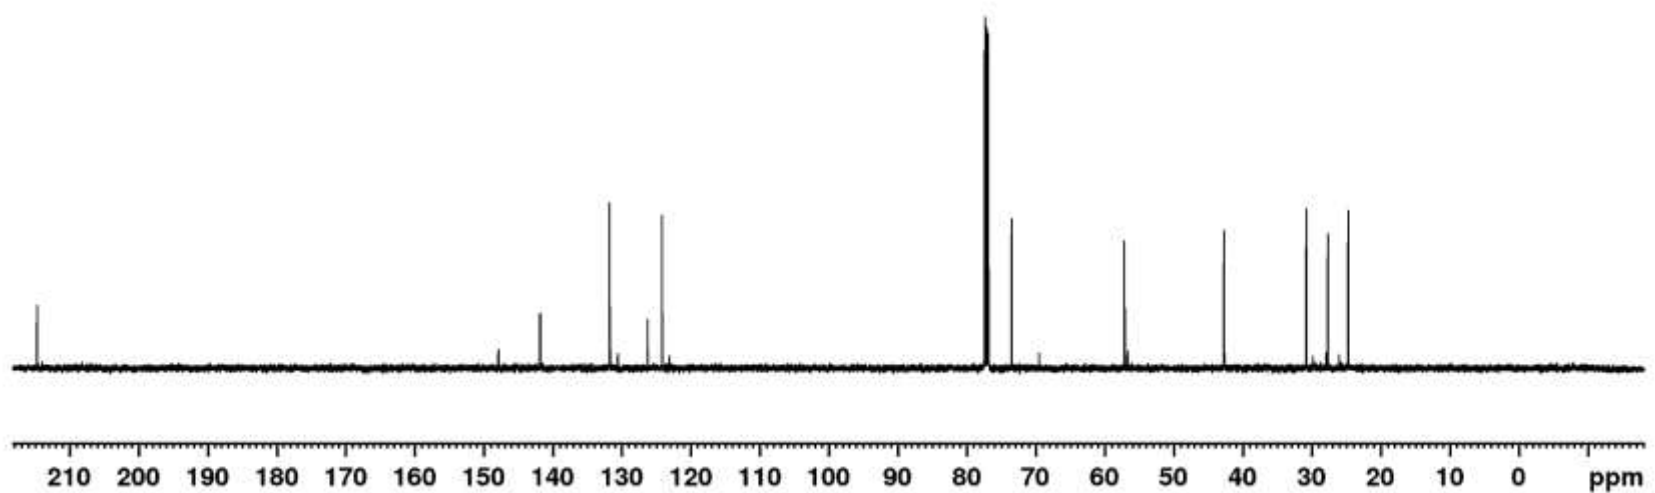

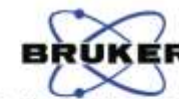

7.3407  
7.3302  
7.3155  
7.2982  
7.2687  
4.8033  
4.7856  
2.6543  
2.6453  
2.6367  
2.6284  
2.6176  
2.6131  
2.6019  
2.5038  
2.4951  
2.4853  
2.4766  
2.4679  
2.4034  
2.3894  
2.3765  
2.3627  
2.3499  
2.3374  
2.1128  
2.1067  
2.1003  
2.0936  
2.0865  
2.0802  
2.0742  
1.8037  
1.7797  
1.7700  
1.7184  
1.6923  
1.6847  
1.6667  
1.6586  
1.6511  
1.6324  
1.6046  
1.5986  
1.5890  
1.5816  
1.5673  
1.5629  
1.5440  
1.5368  
1.3490  
1.3233  
1.3168  
1.2981  
1.2906  
1.2728  
1.2628

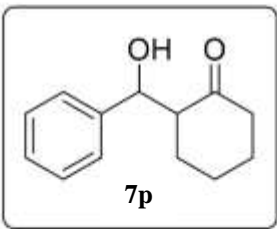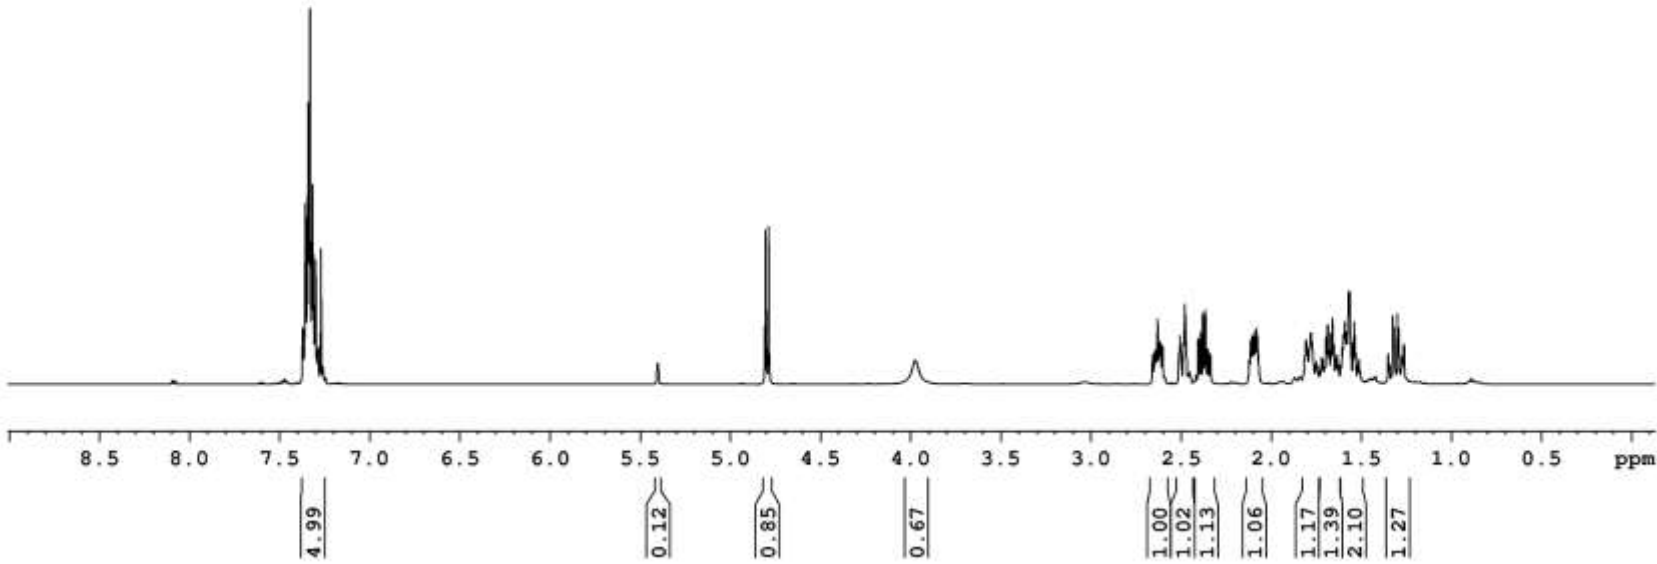

ES-KK-PhCHO-PDT; CDCl<sub>3</sub>; 06/12/18

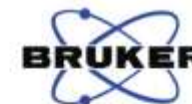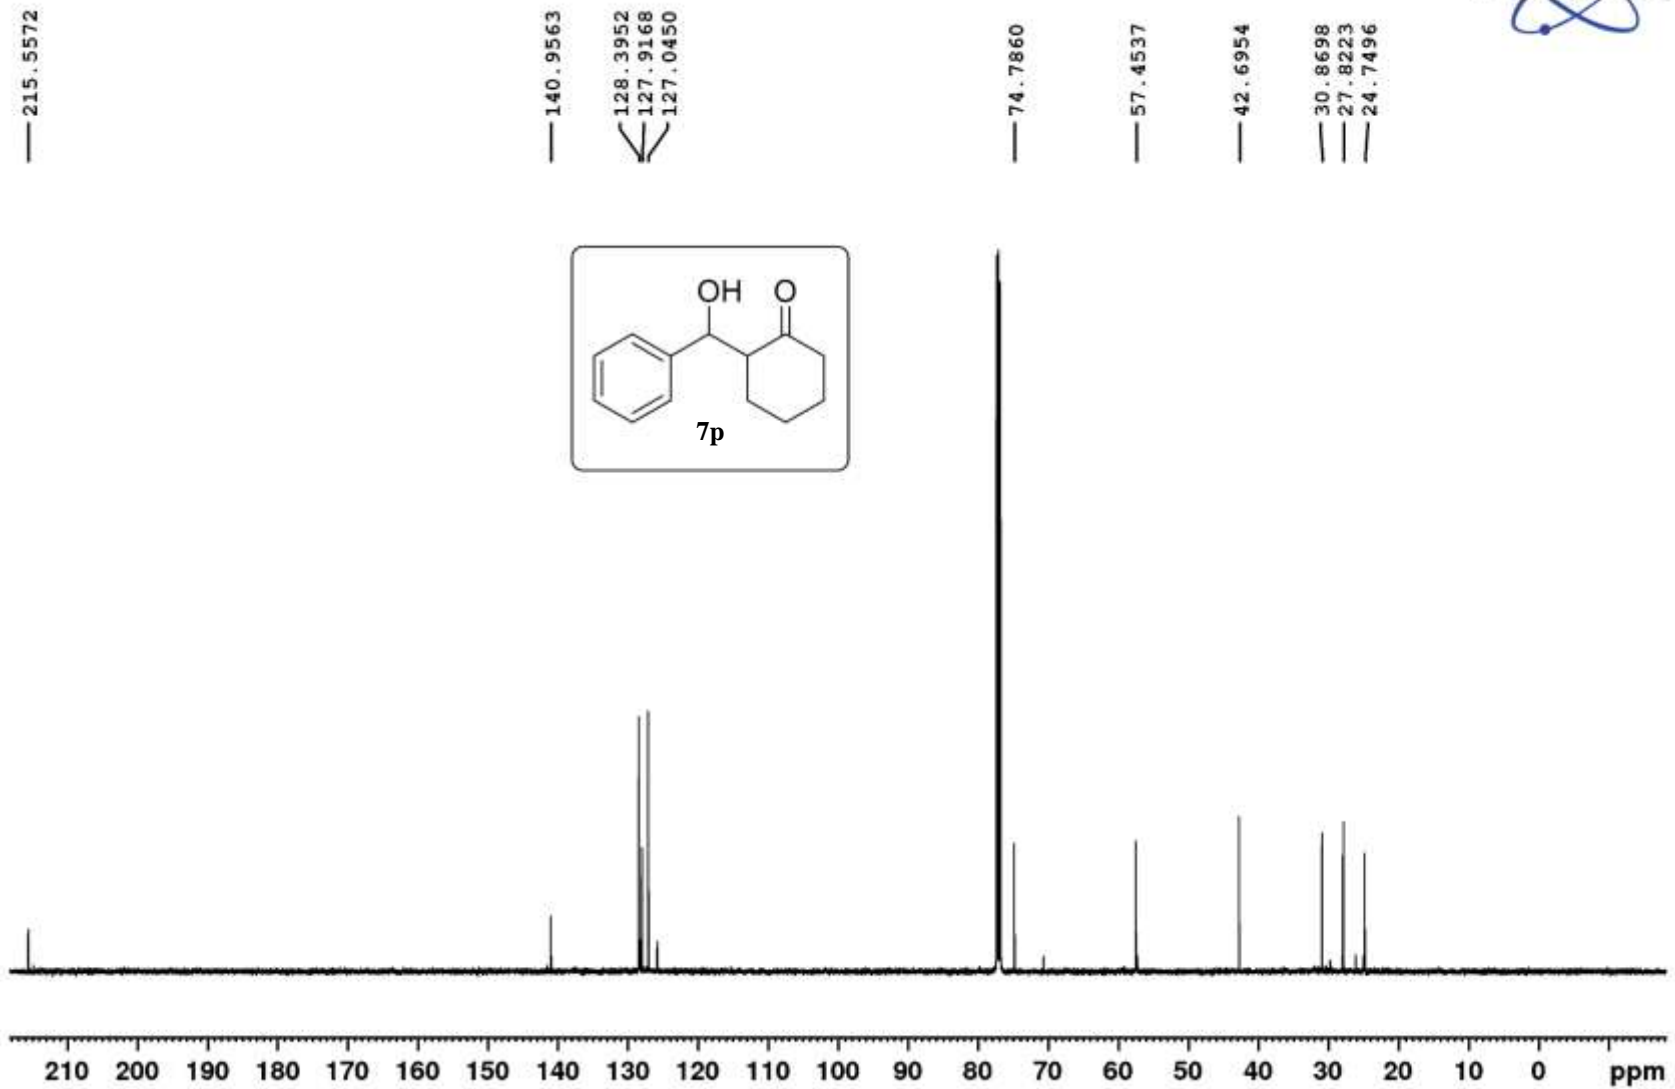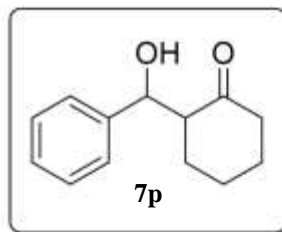

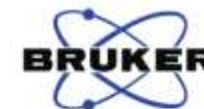

7.8617  
7.8444  
7.8379  
7.8315  
7.7652  
7.5065  
7.4974  
7.4936  
7.4856  
7.4789  
7.4649  
7.2688  
4.9862  
4.9686  
4.0665  
2.7566  
2.7464  
2.7387  
2.7304  
2.7210  
2.7149  
2.7031  
2.5286  
2.5012  
2.4250  
2.4126  
2.3980  
2.3854  
2.3712  
2.3587  
2.1210  
2.1151  
2.1091  
2.1027  
2.0958  
2.0888  
2.0826  
2.0765  
2.0706  
1.7847  
1.7819  
1.7782  
1.7552  
1.7050  
1.6972  
1.6894  
1.6793  
1.6711  
1.6635  
1.6447  
1.6060  
1.6005  
1.5946  
1.5885  
1.5753  
1.5691  
1.5630  
1.5553  
1.5481  
1.5411  
1.5296  
1.5226  
1.5157  
1.3959  
1.3704  
1.3631  
1.3449  
1.3376  
1.3128

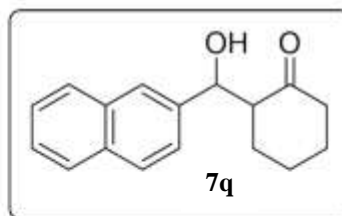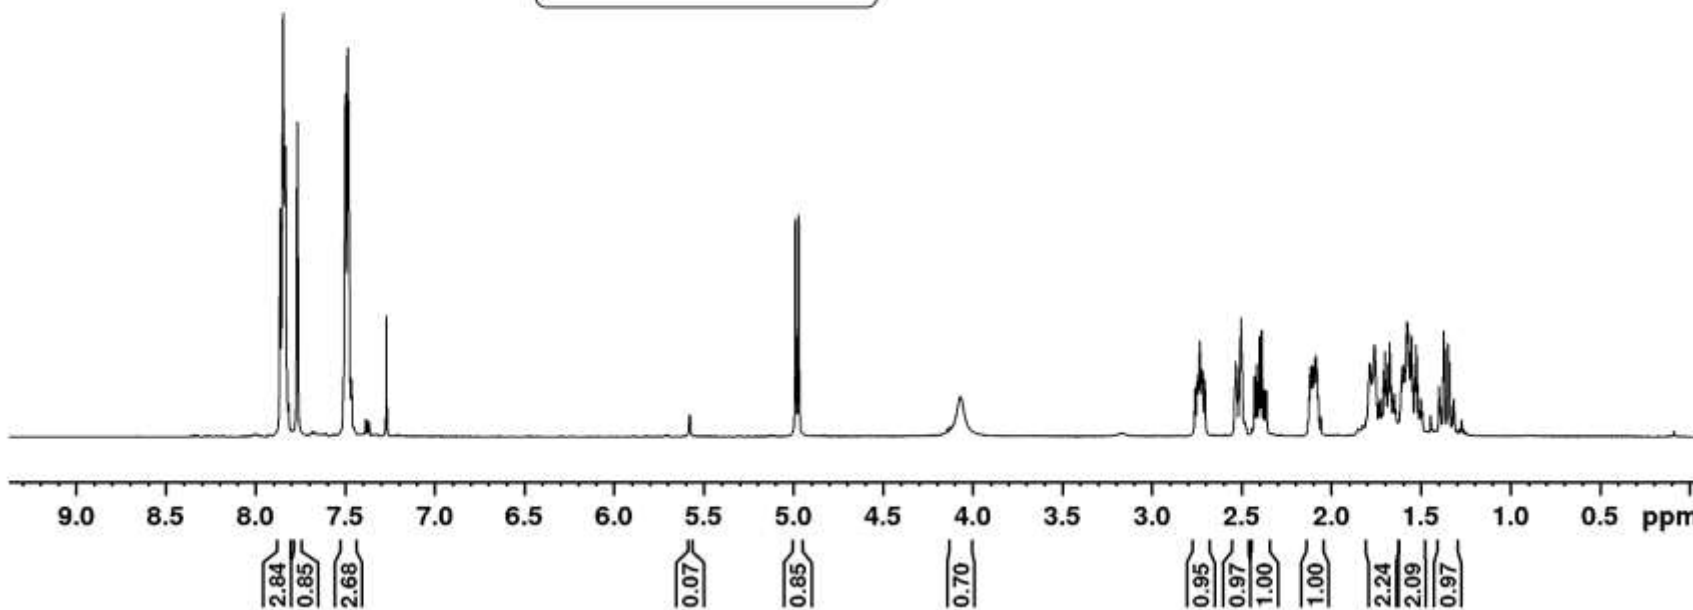

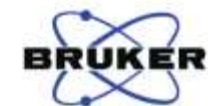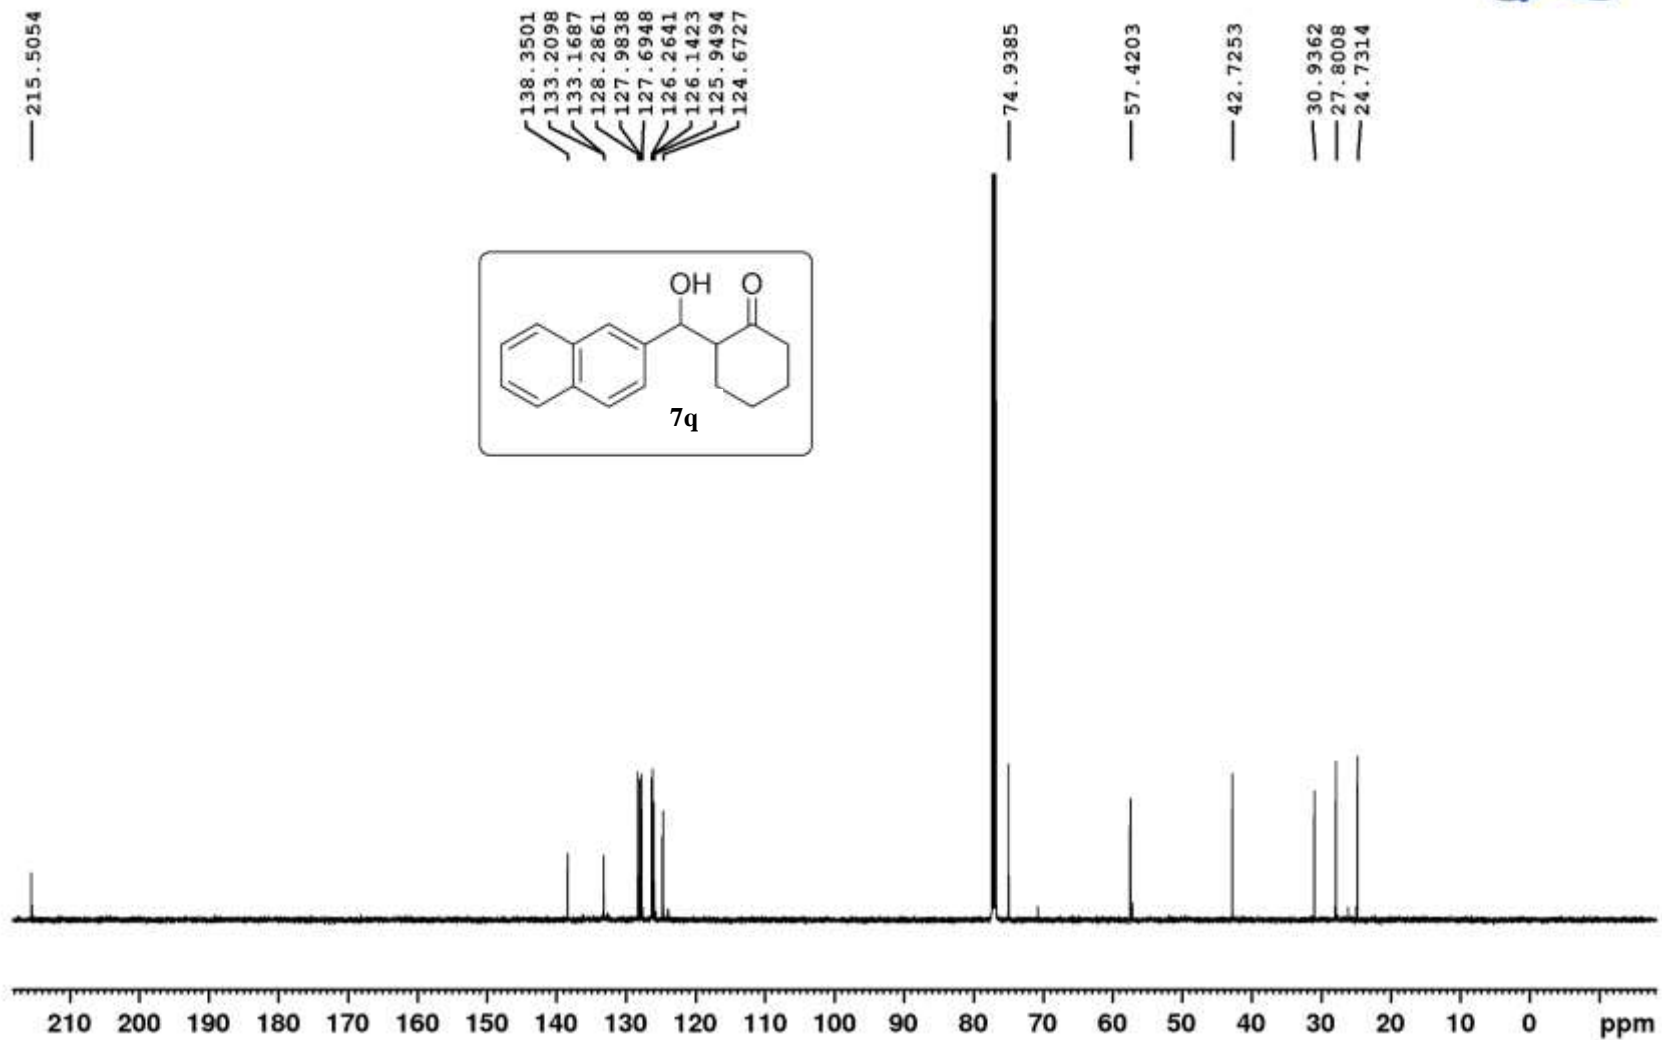

ES-KK-4-OMe-PDT; CDCl<sub>3</sub>; 10/7/19

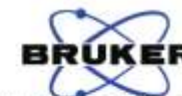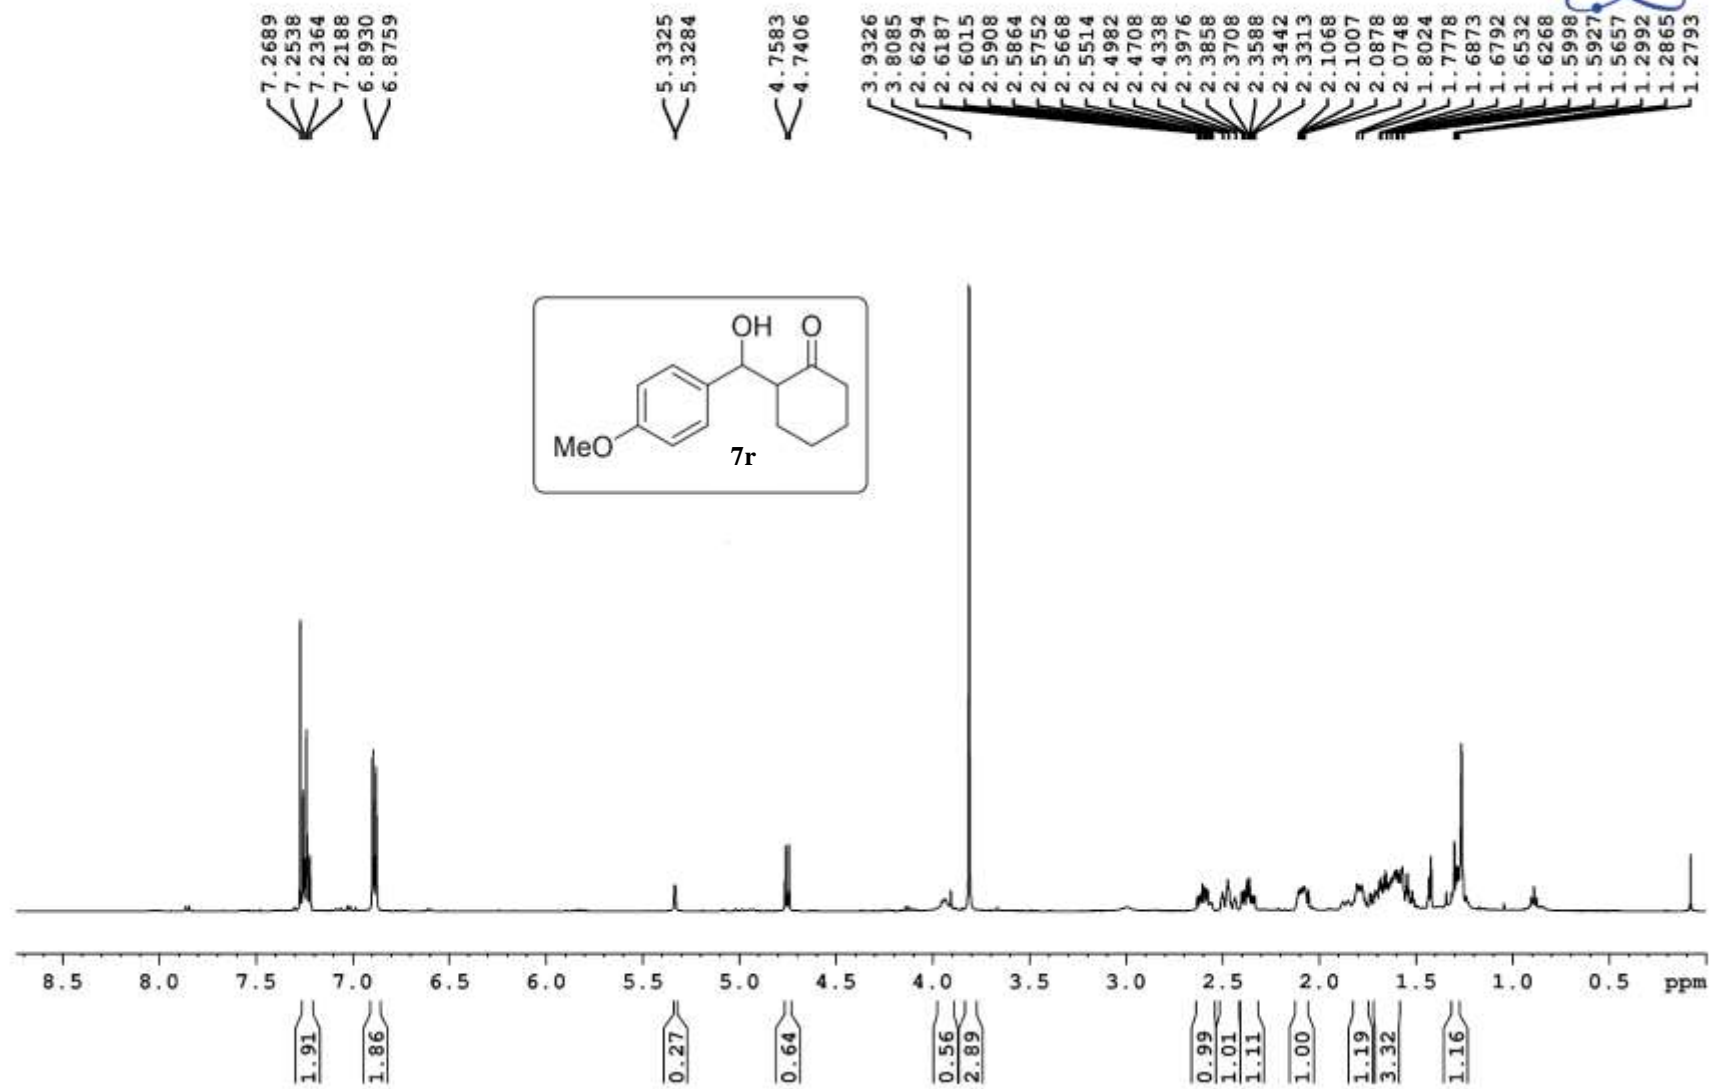

ES-KK-4-OMe-PDT;CDCl3;10/07/19

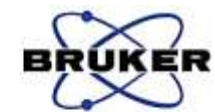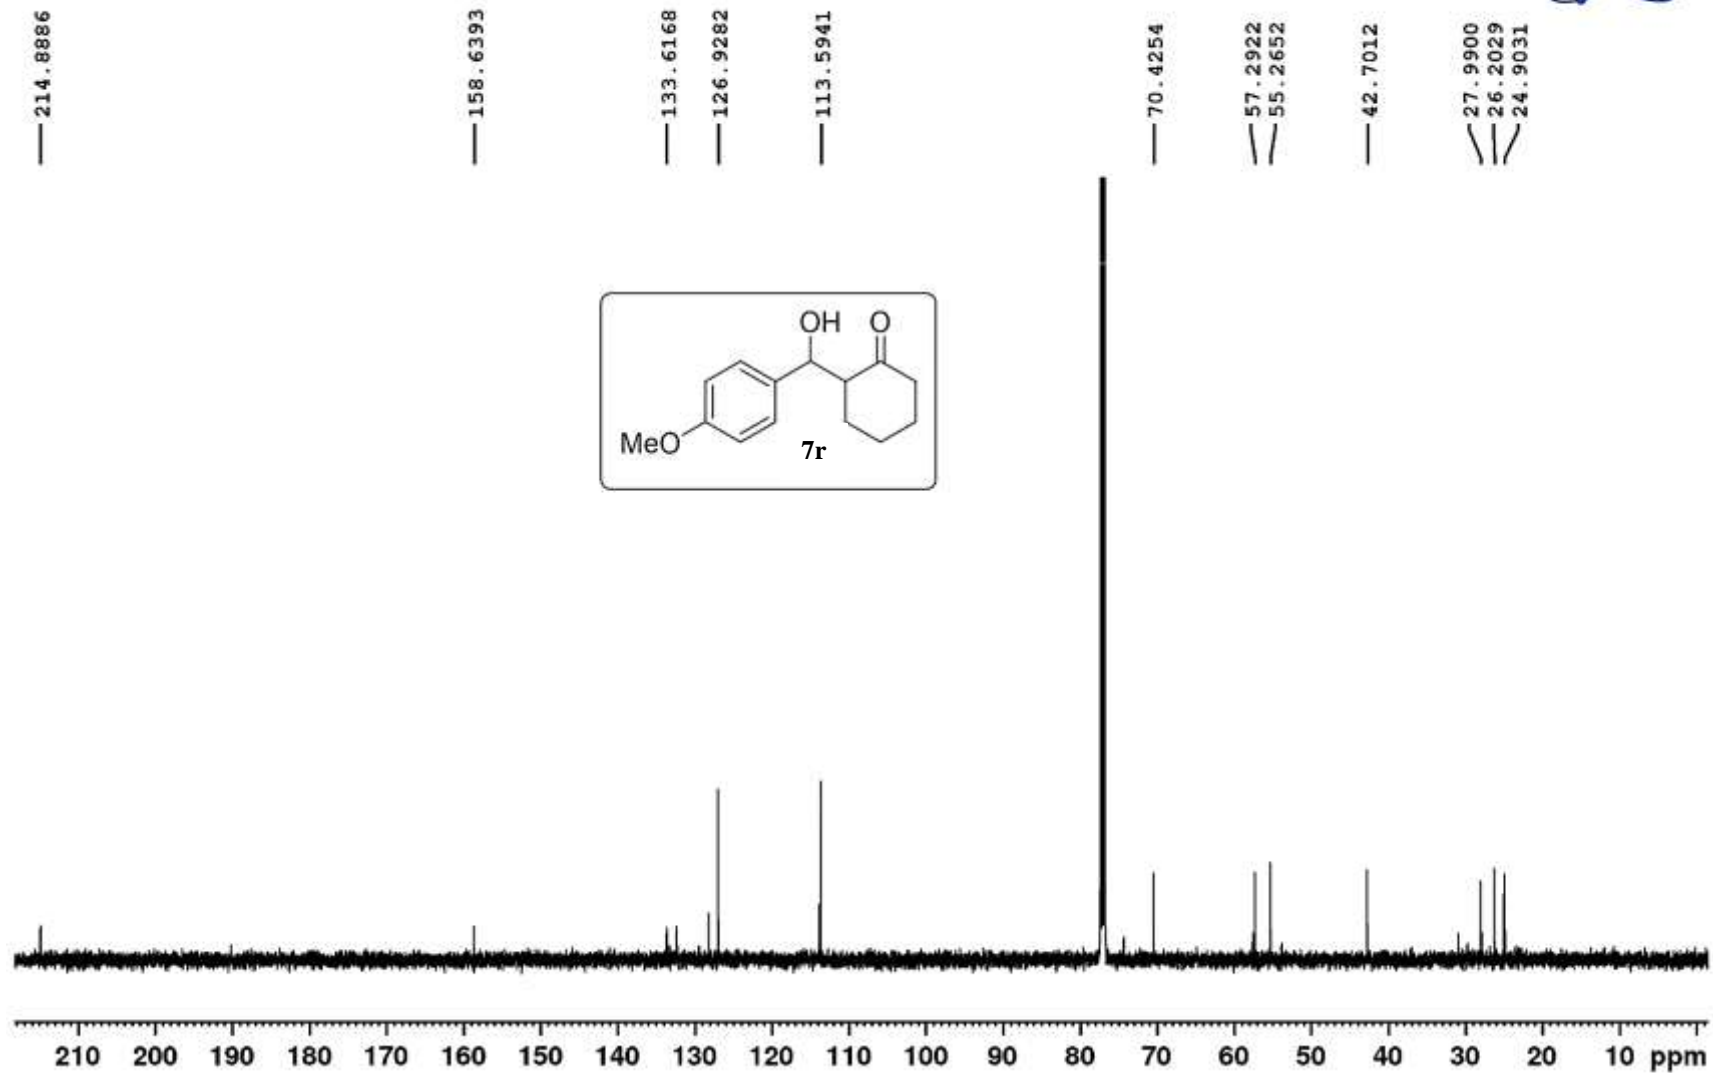

ES-KK-CYP-PDT; CDC13; 02/11/18

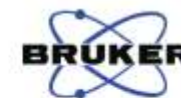

8.2242  
8.2171  
8.2070  
8.1998

7.5470  
7.5294  
7.5115  
7.2683

5.4225

4.8577  
4.8394  
4.7863

2.5011  
2.4807  
2.4593  
2.4456  
2.4138  
2.3964  
2.3784  
2.3176  
2.2999  
2.2785  
2.2612  
2.2394  
2.1769  
2.1564  
2.1397  
2.1184  
2.0350  
2.0254  
2.0054  
1.9818  
1.7444  
1.7256  
1.6845  
1.5942  
1.5659  
1.5524

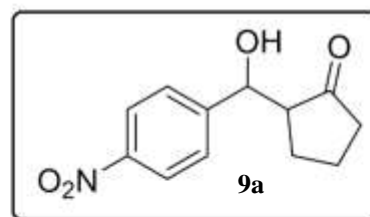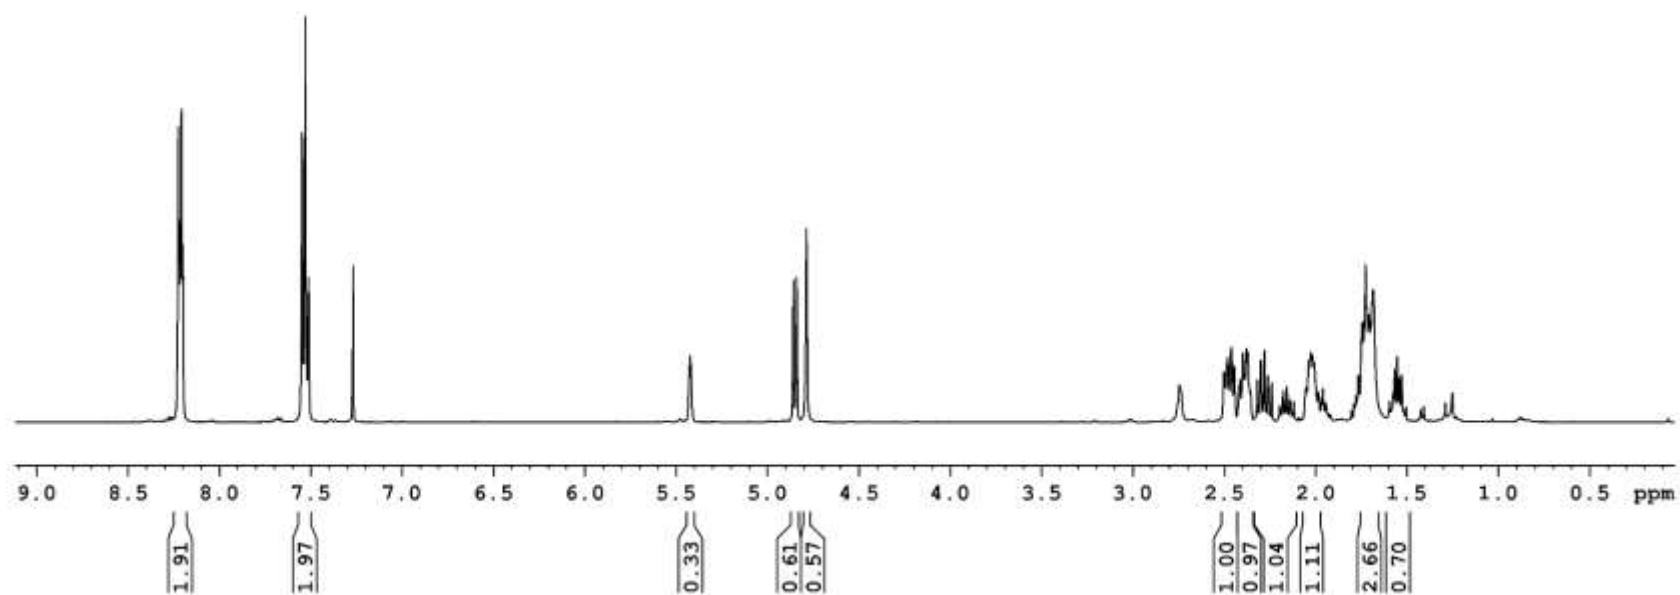



ES-KK-CYP-PDT;CDCl3;02/11/18

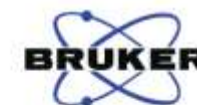

222.3003  
219.5245

150.1702  
148.6457  
147.6537  
147.1849

127.3707  
126.3811  
123.7549  
123.6742

74.4482  
70.4836

56.0949  
55.1040

38.9505  
38.6223

26.8641  
22.4270  
20.3867  
20.3427

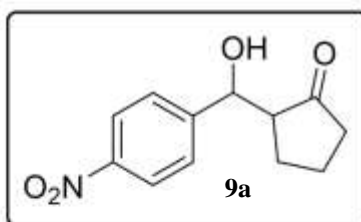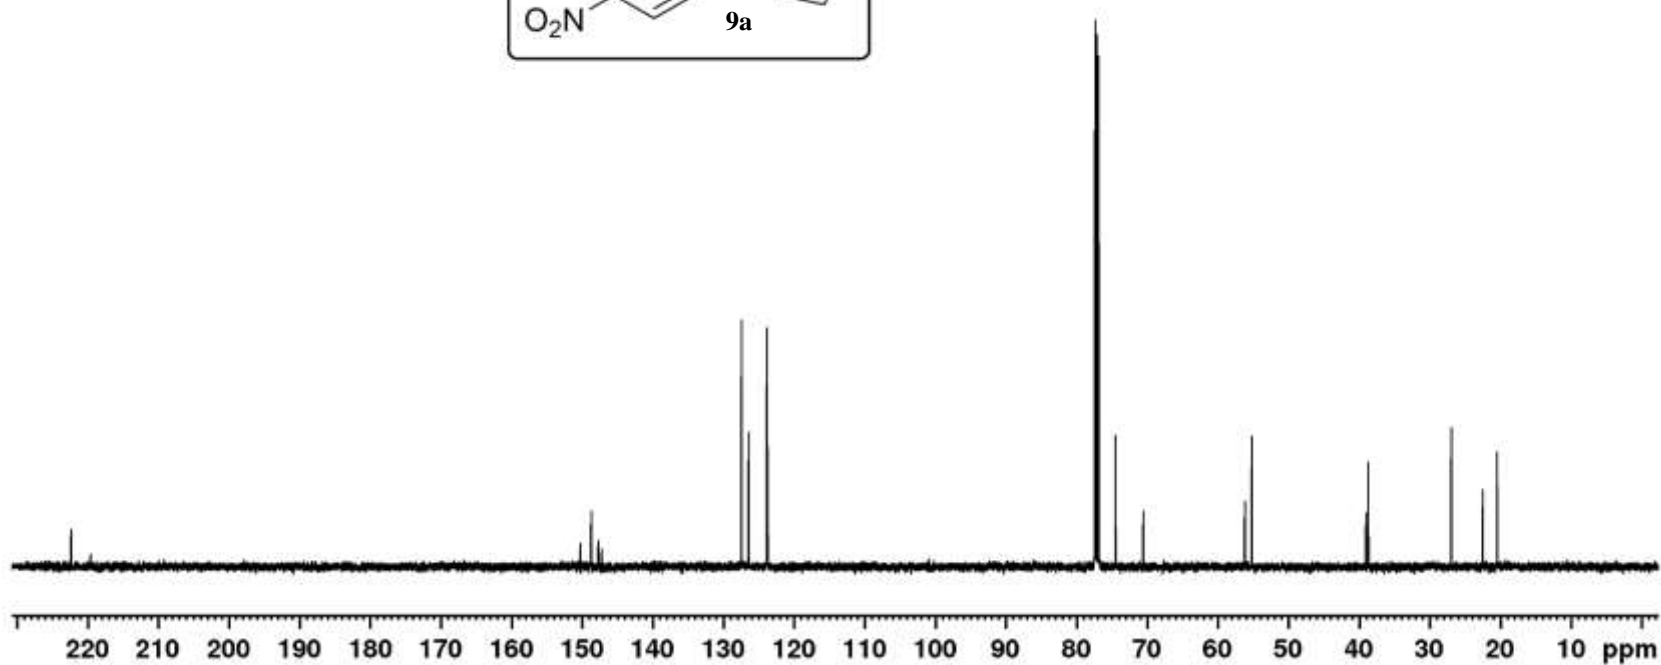

ES-KK-Ac-PDT; CDC13; 14/11/18

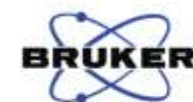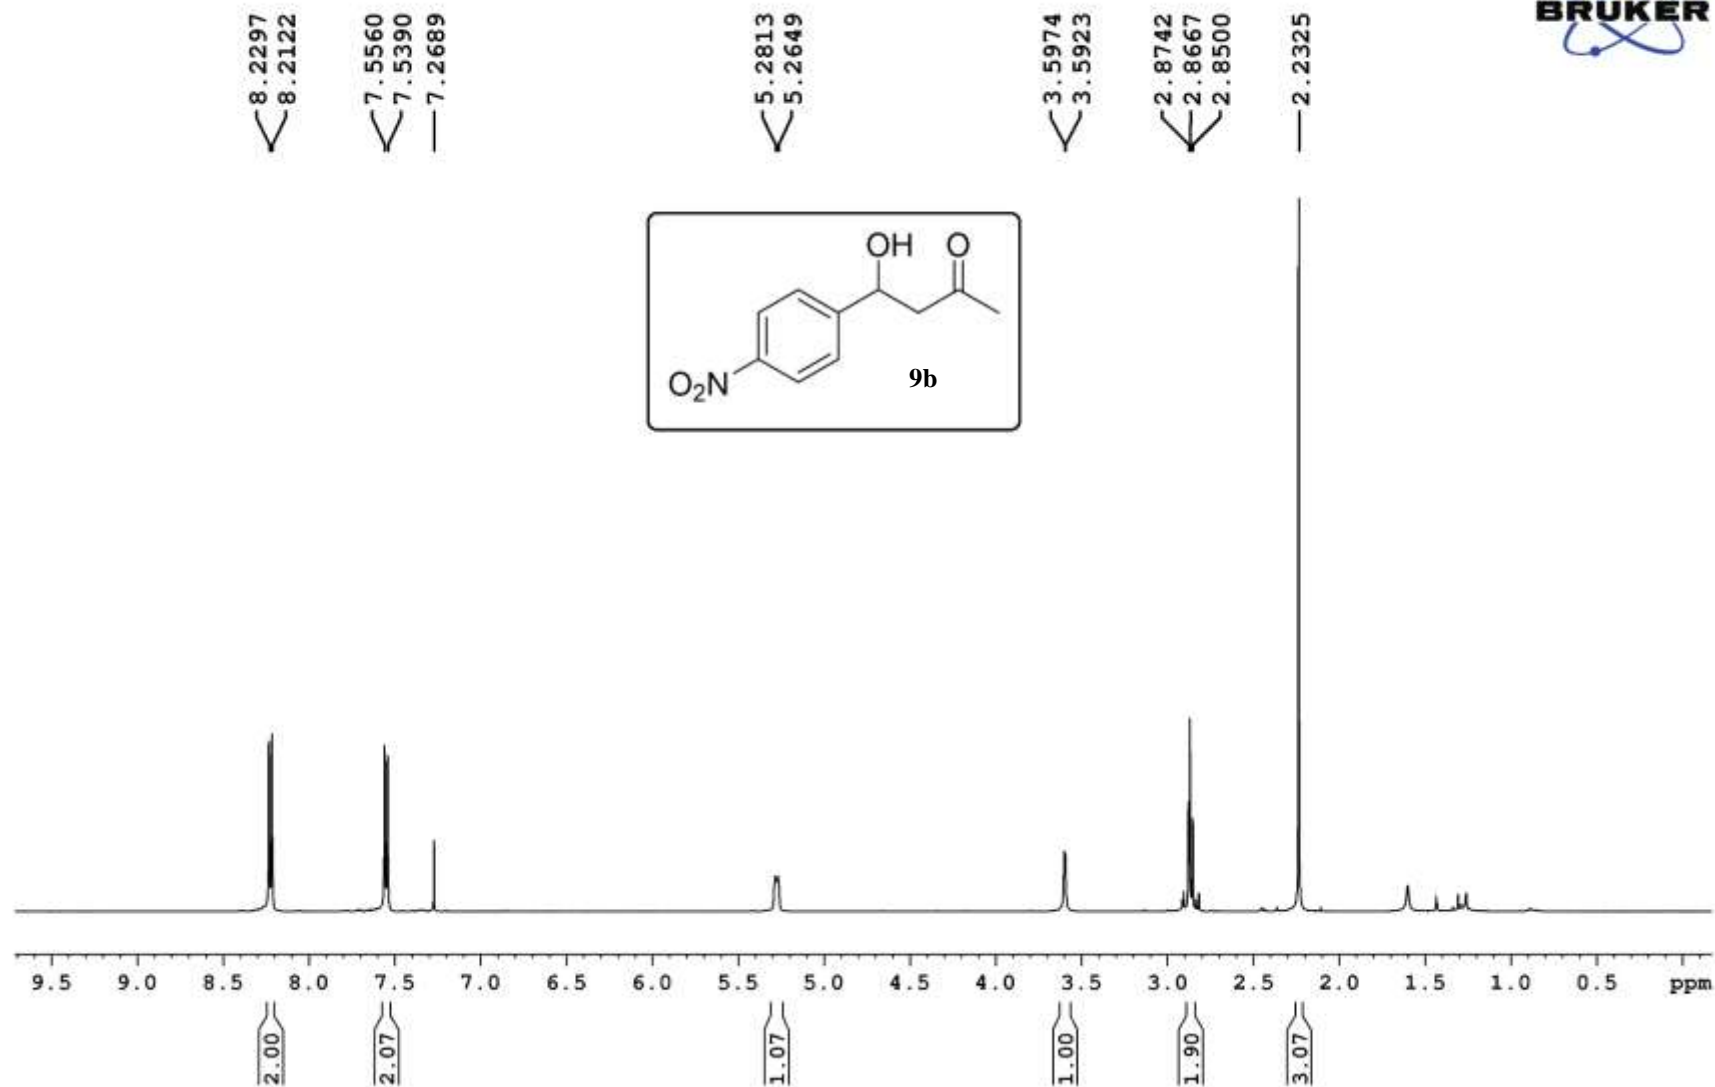

ES-KK-Ac-PDT;CDCl3;14/11/18

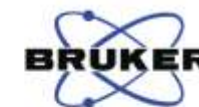

— 208.6147

— 149.9894  
— 147.3229

— 126.4448  
— 123.8014

— 68.9108

— 51.5326

— 30.7519

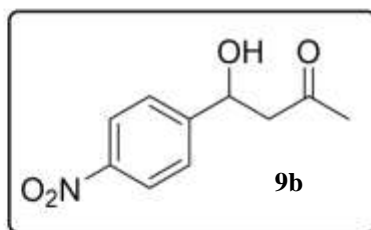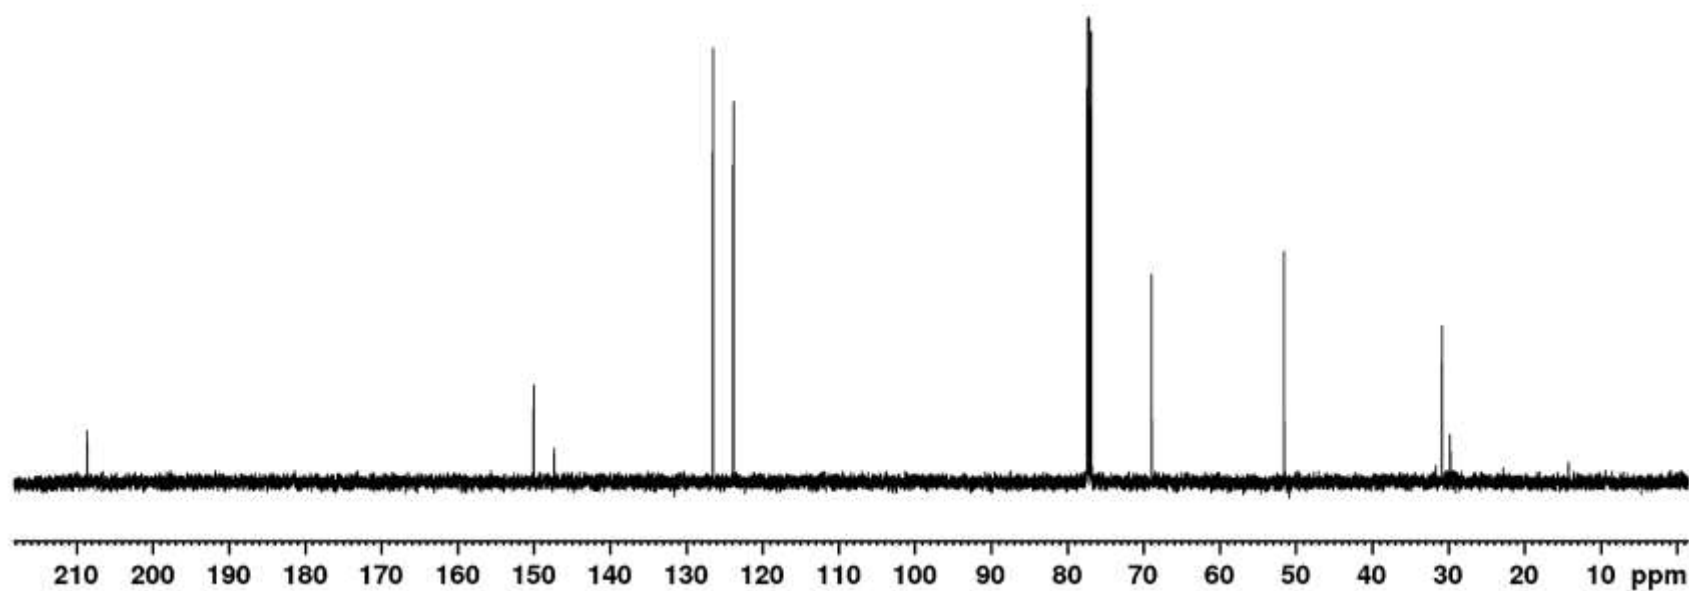

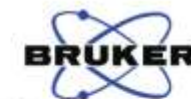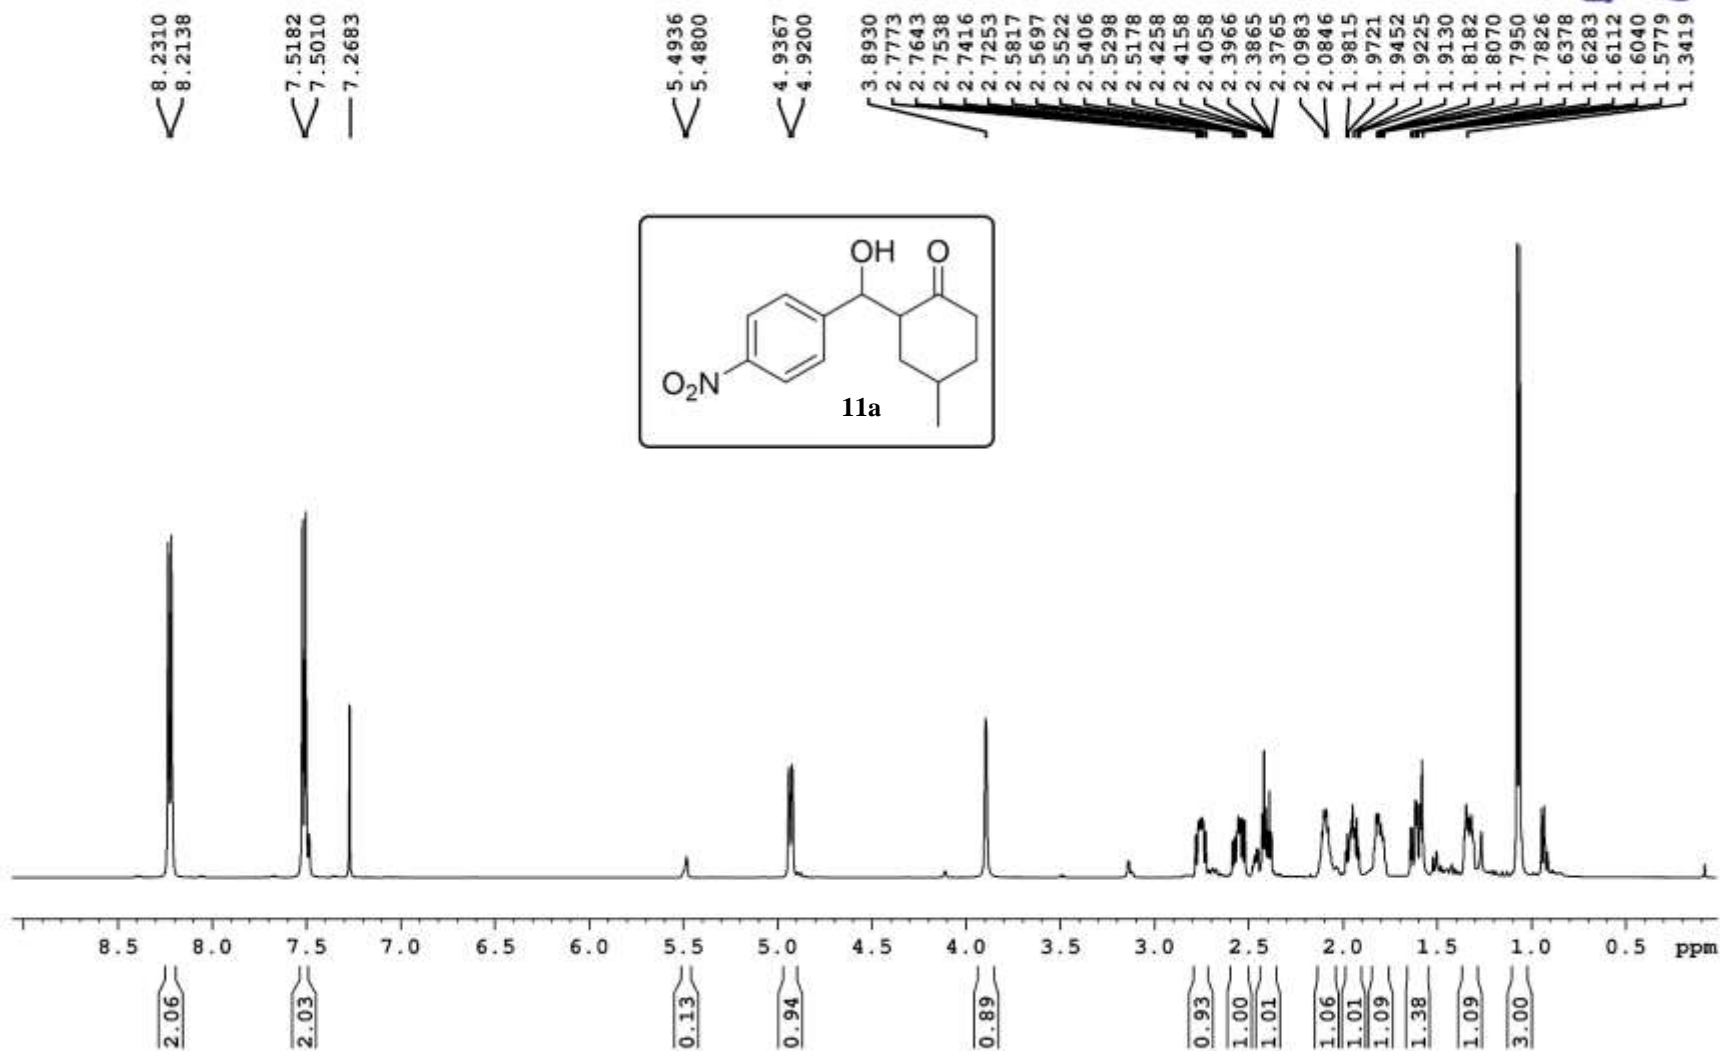

ES-KK-4NO2-4MC-PDT;CDCl3;24/11/18

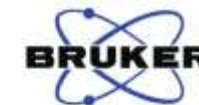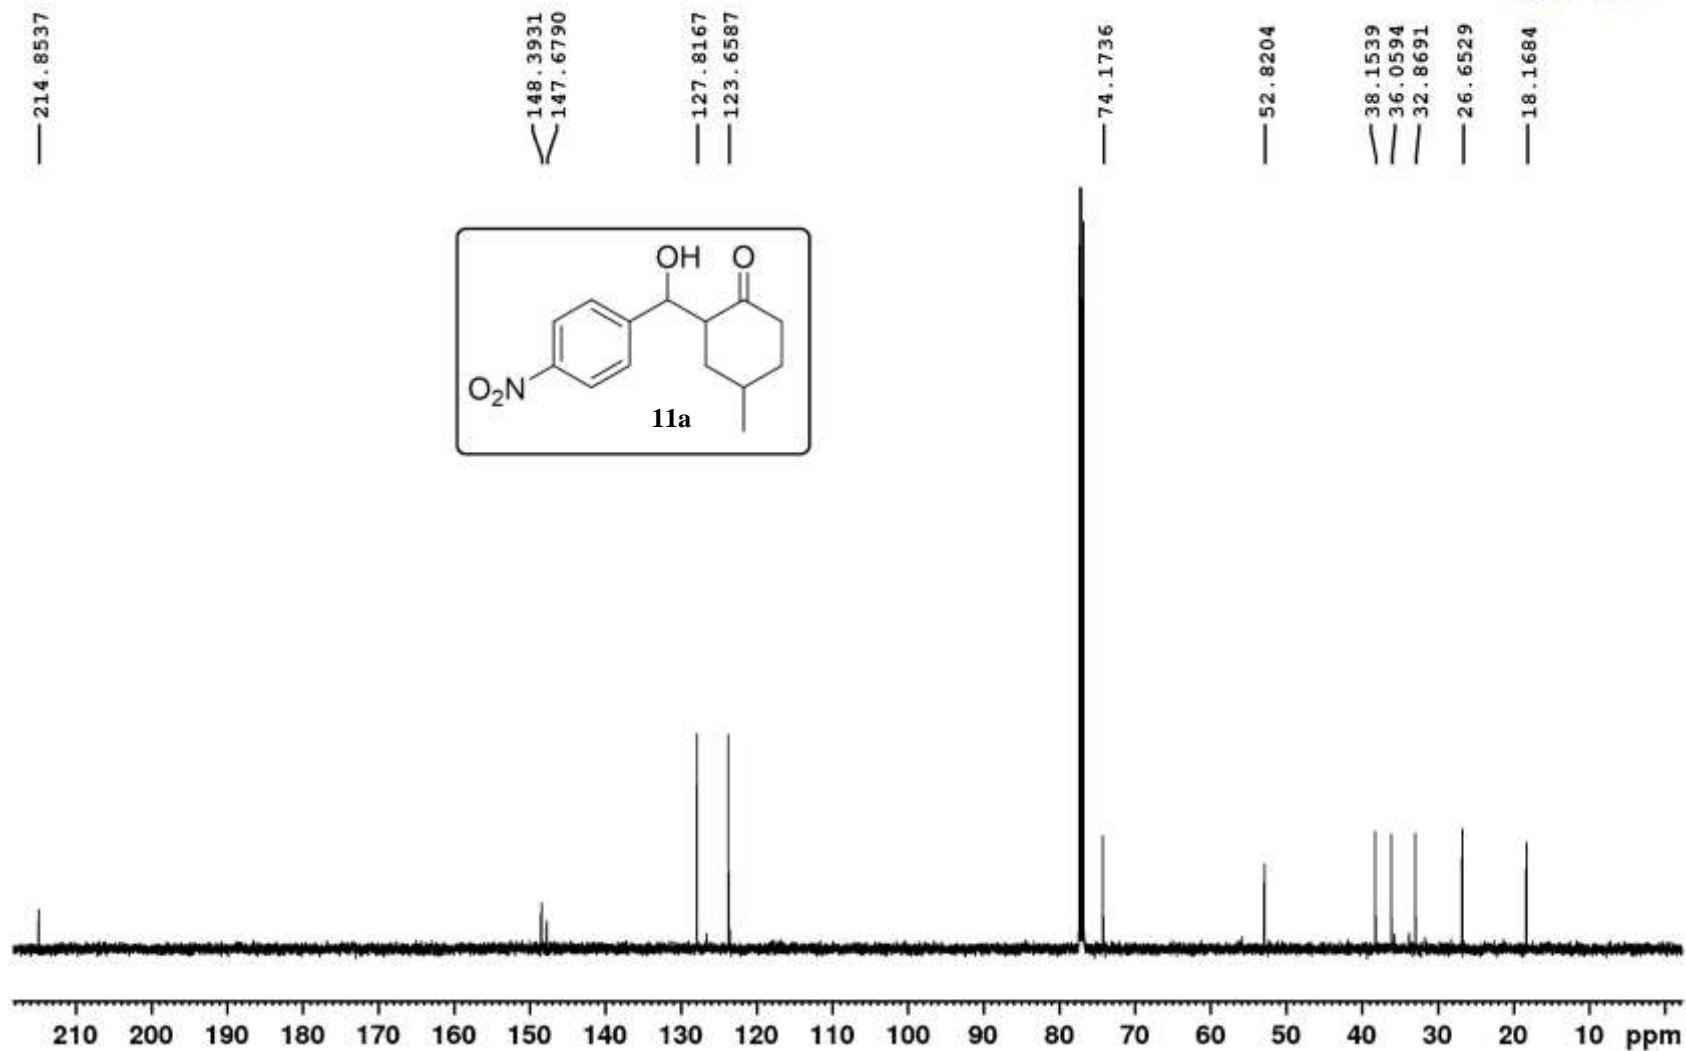

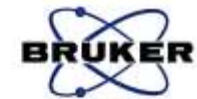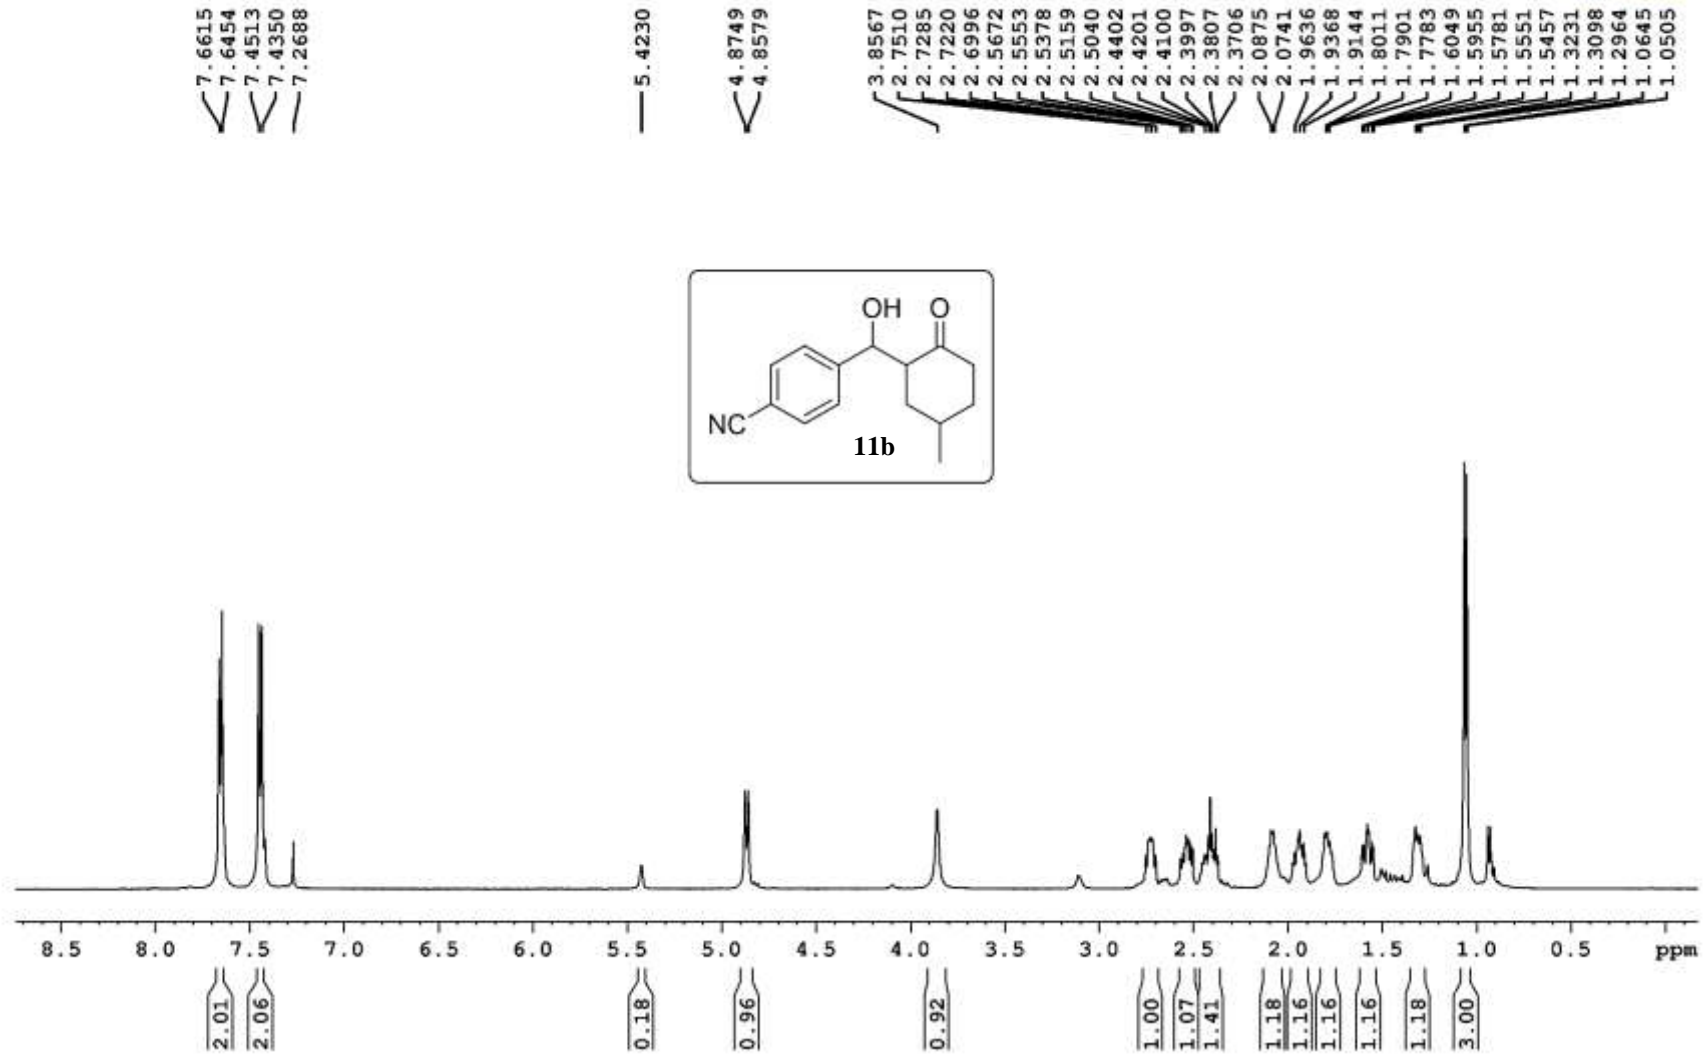

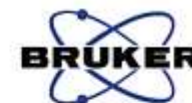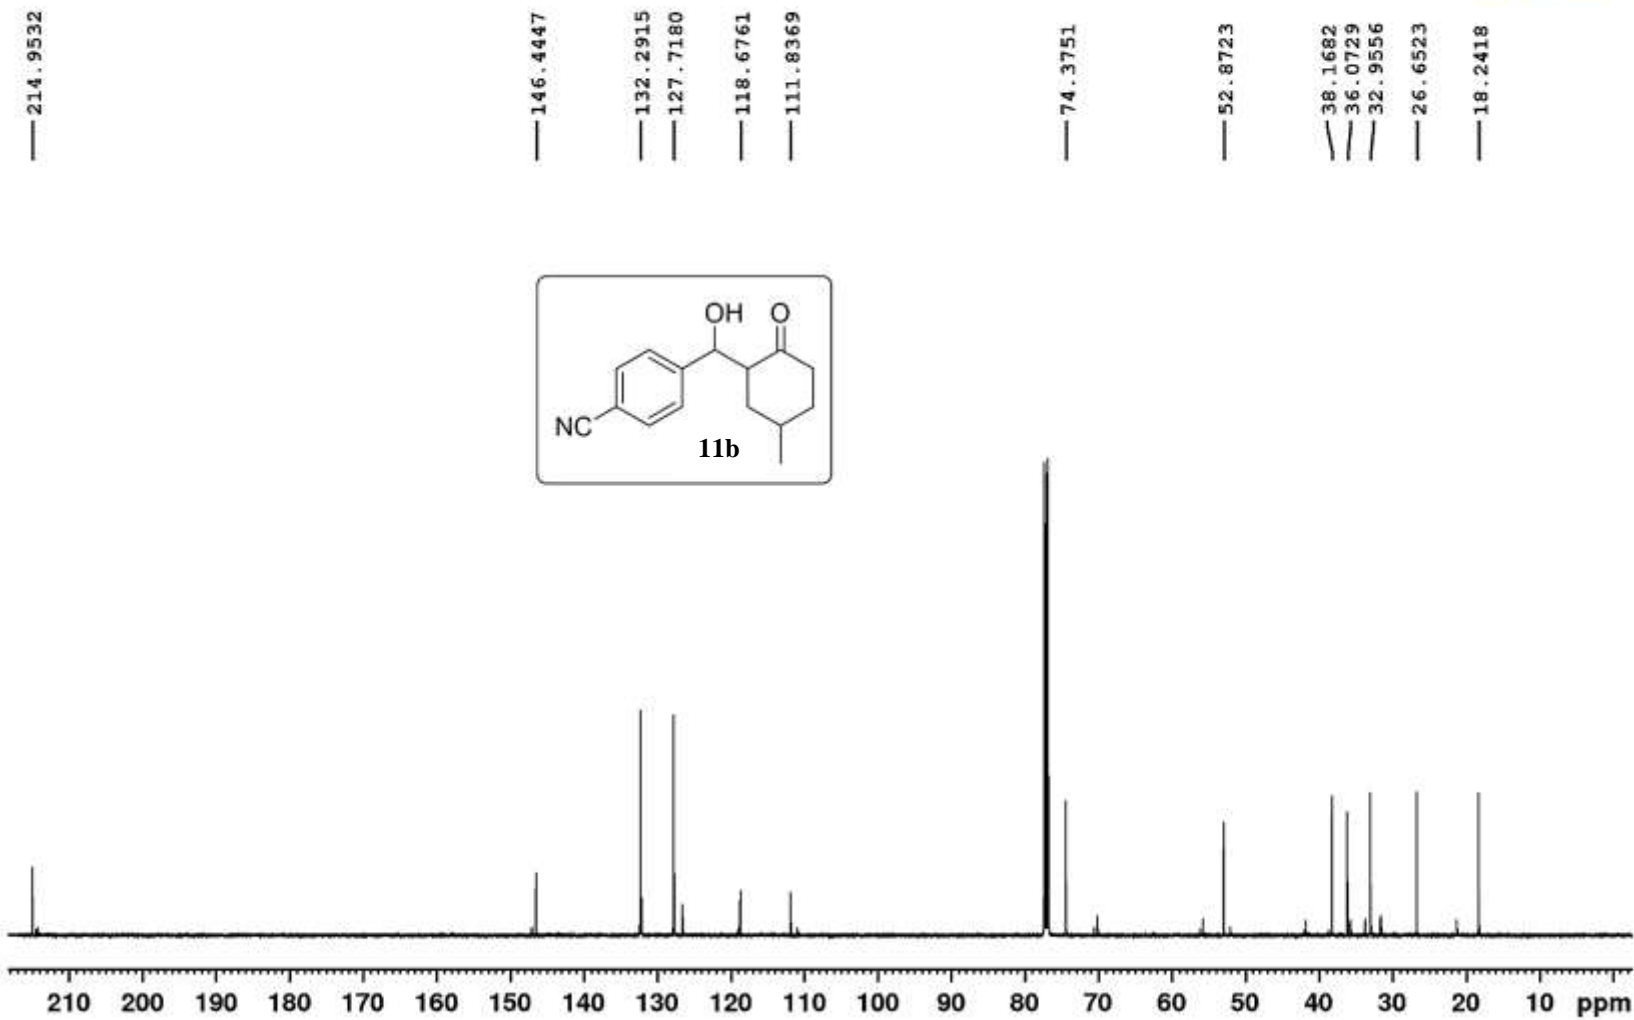

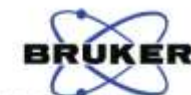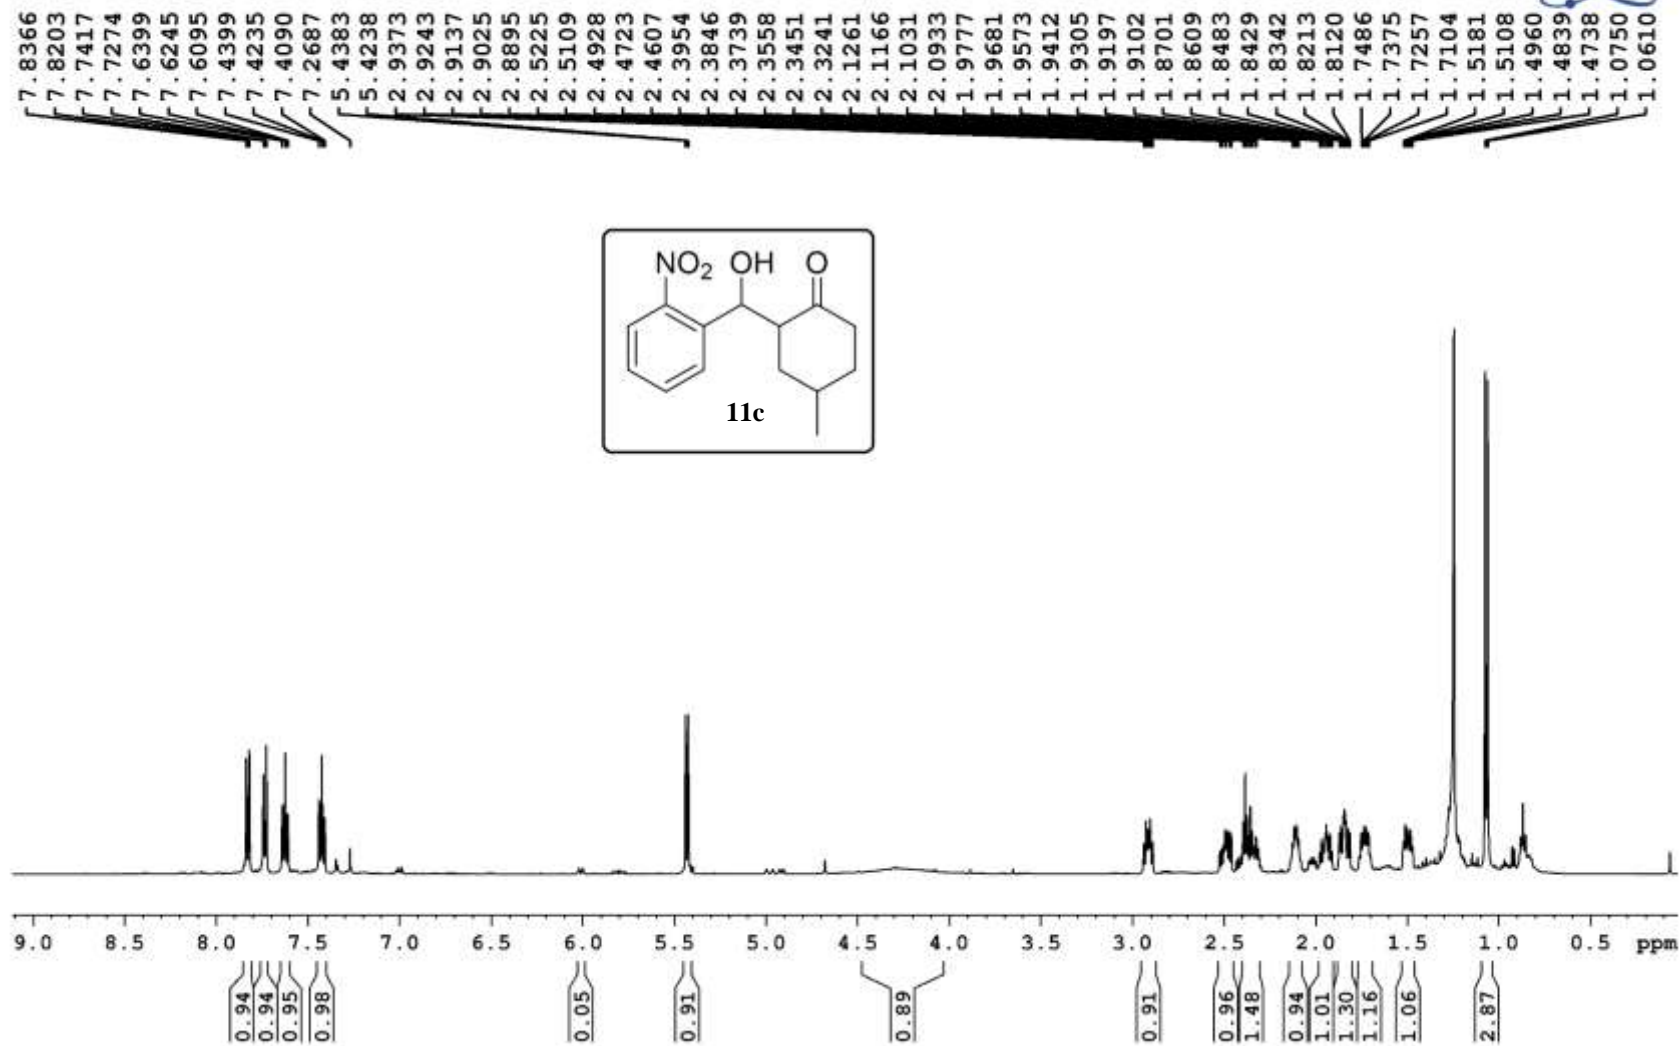



ES-KK-2NO2-4MC-PDT;CDCl3;20/12/18

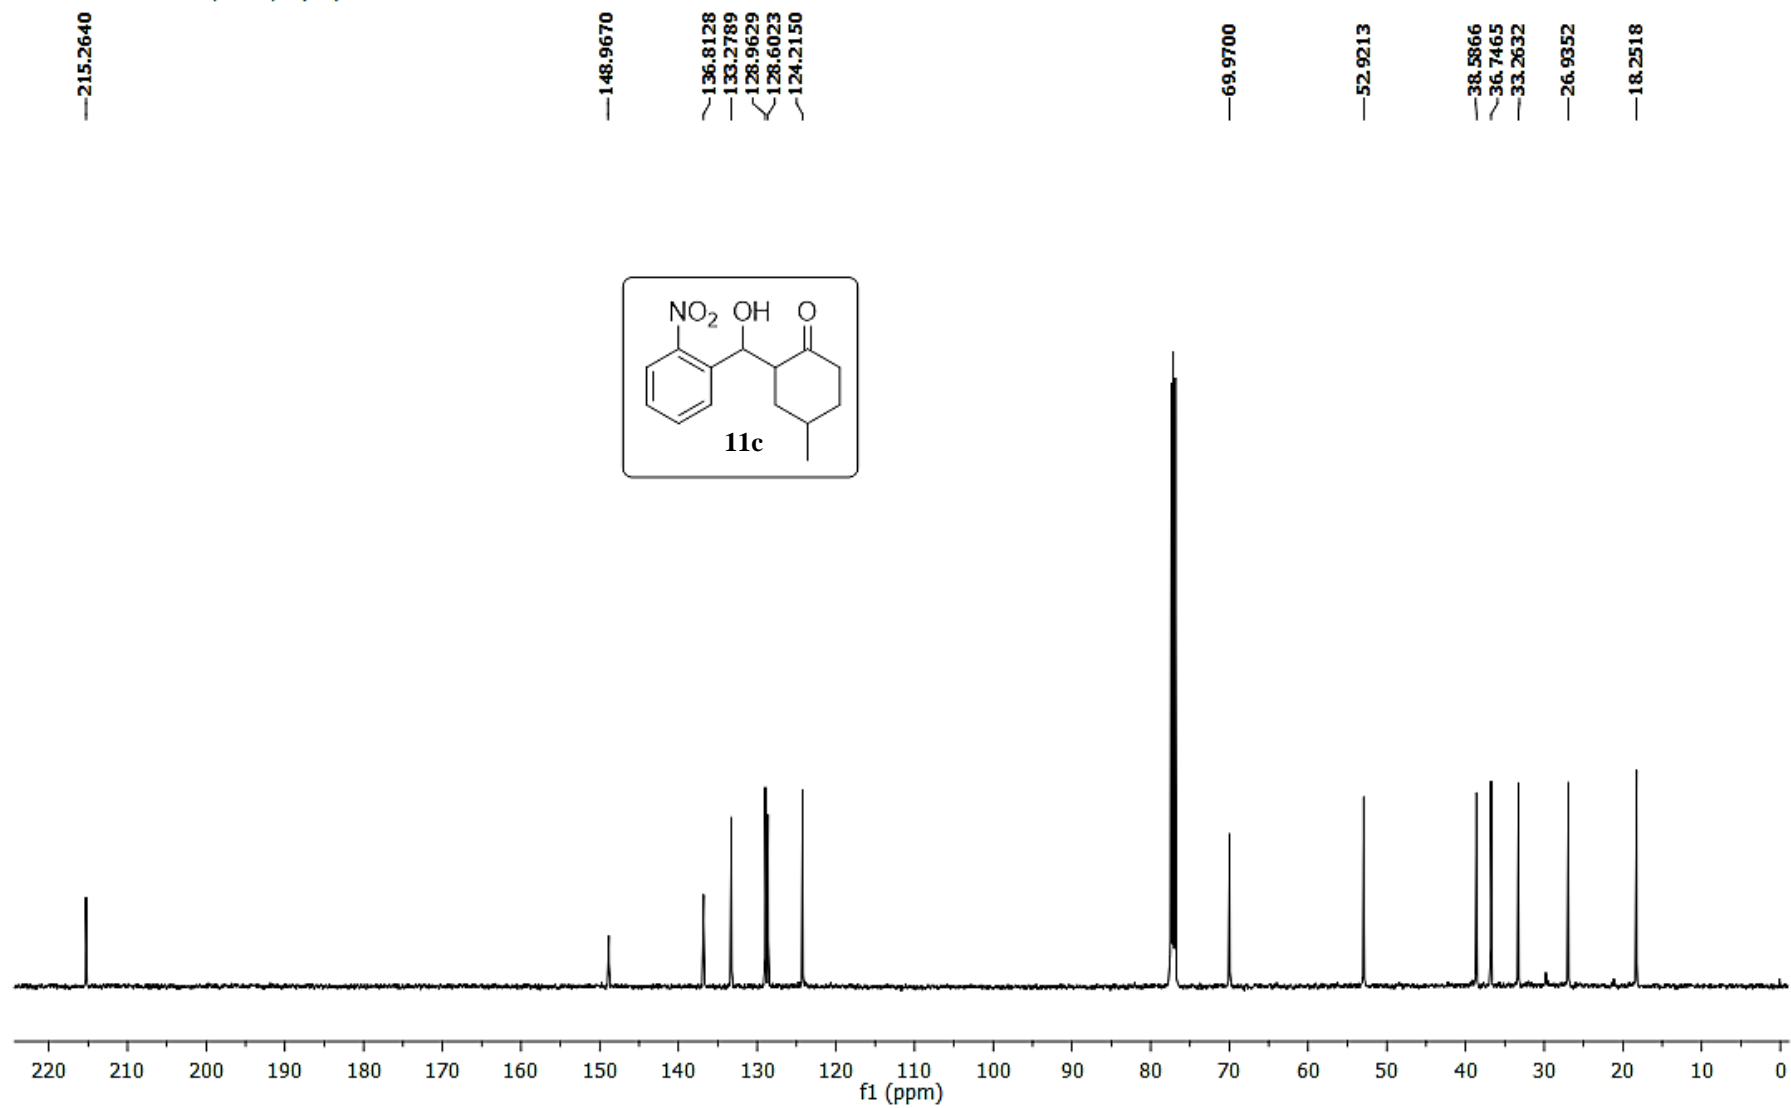

$^1\text{H}$ ,  $^{13}\text{C}$  NMR spectra and HRMS analysis reports of the catalysts 1a & 1b and the catalyst precursors 4 & 4'

ES-KK-C-NHTs-CAT; 1H; D2O; 05/05/18

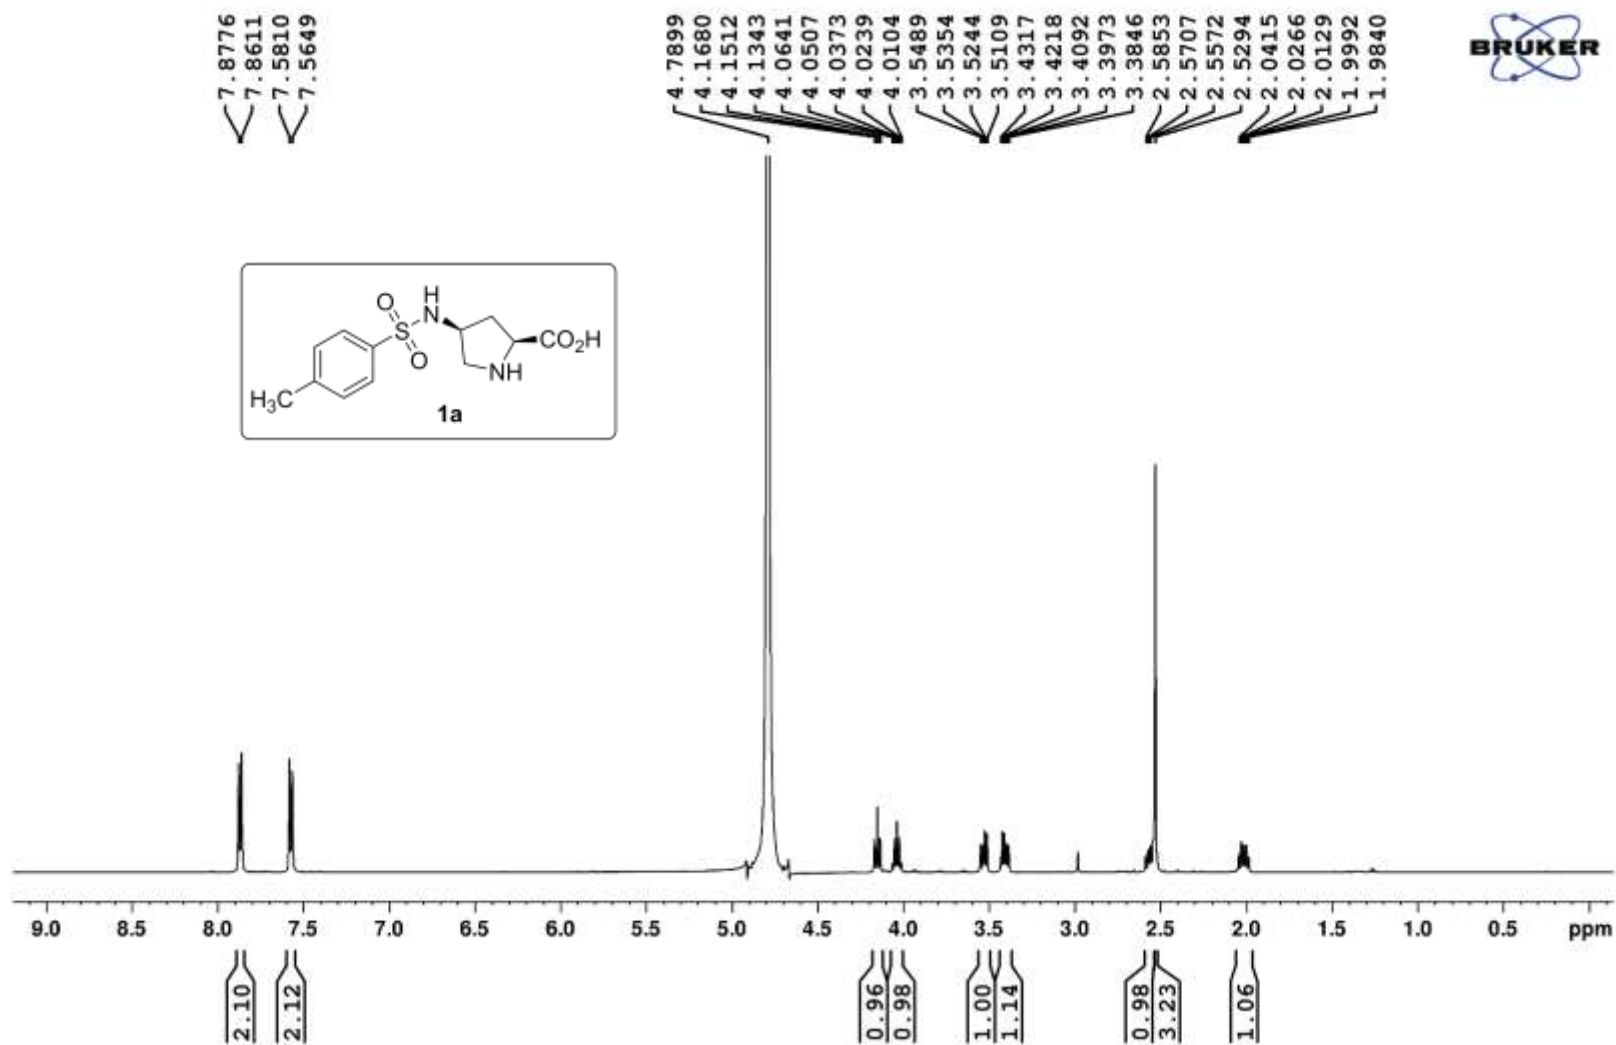

ES-KK-C-NHTs-CAT; 13C; D2O; 08/05/18

— 173.4311

— 145.6692

— 134.8340

— 130.3507

— 126.9679

— 59.8359

— 51.7571

— 49.8294

— 34.3173

— 20.7769

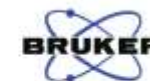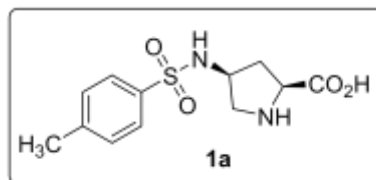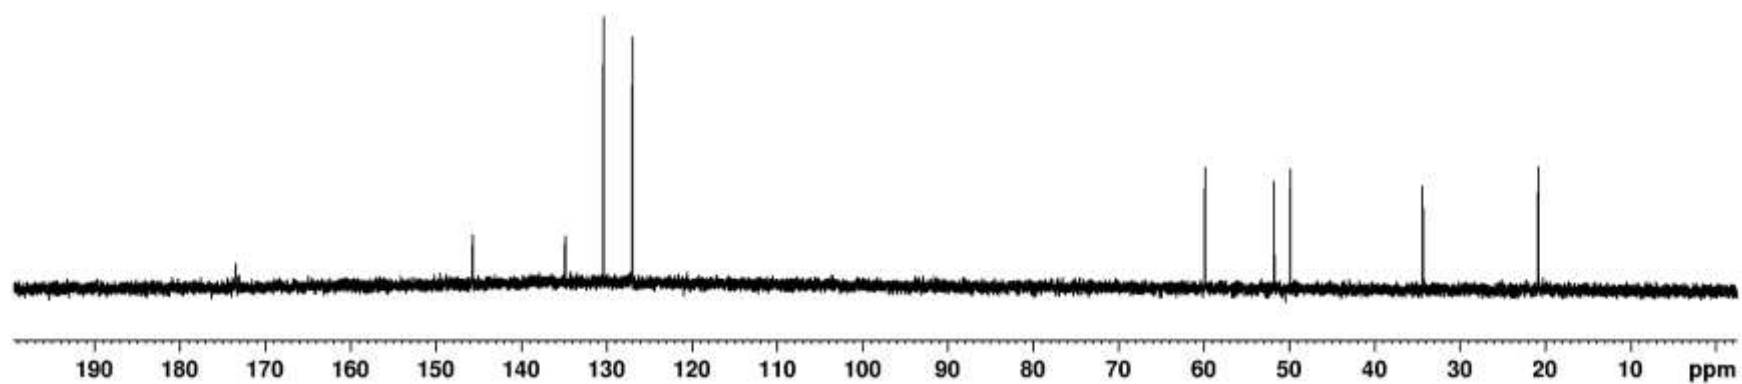

PTAP-4 7 (0.135) AM (Cen,4, 80.00, Ht,10000.0,0.00,0.00); Cm (3:12-28:36)  
285.0905

TOF MS ES+  
2.33e7

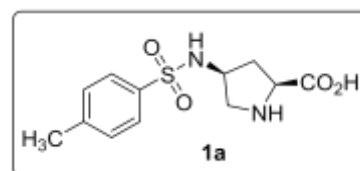

$m/z$  [M+H]<sup>+</sup> calculated for C<sub>12</sub>H<sub>17</sub>N<sub>2</sub>O<sub>4</sub>S: 285.0904

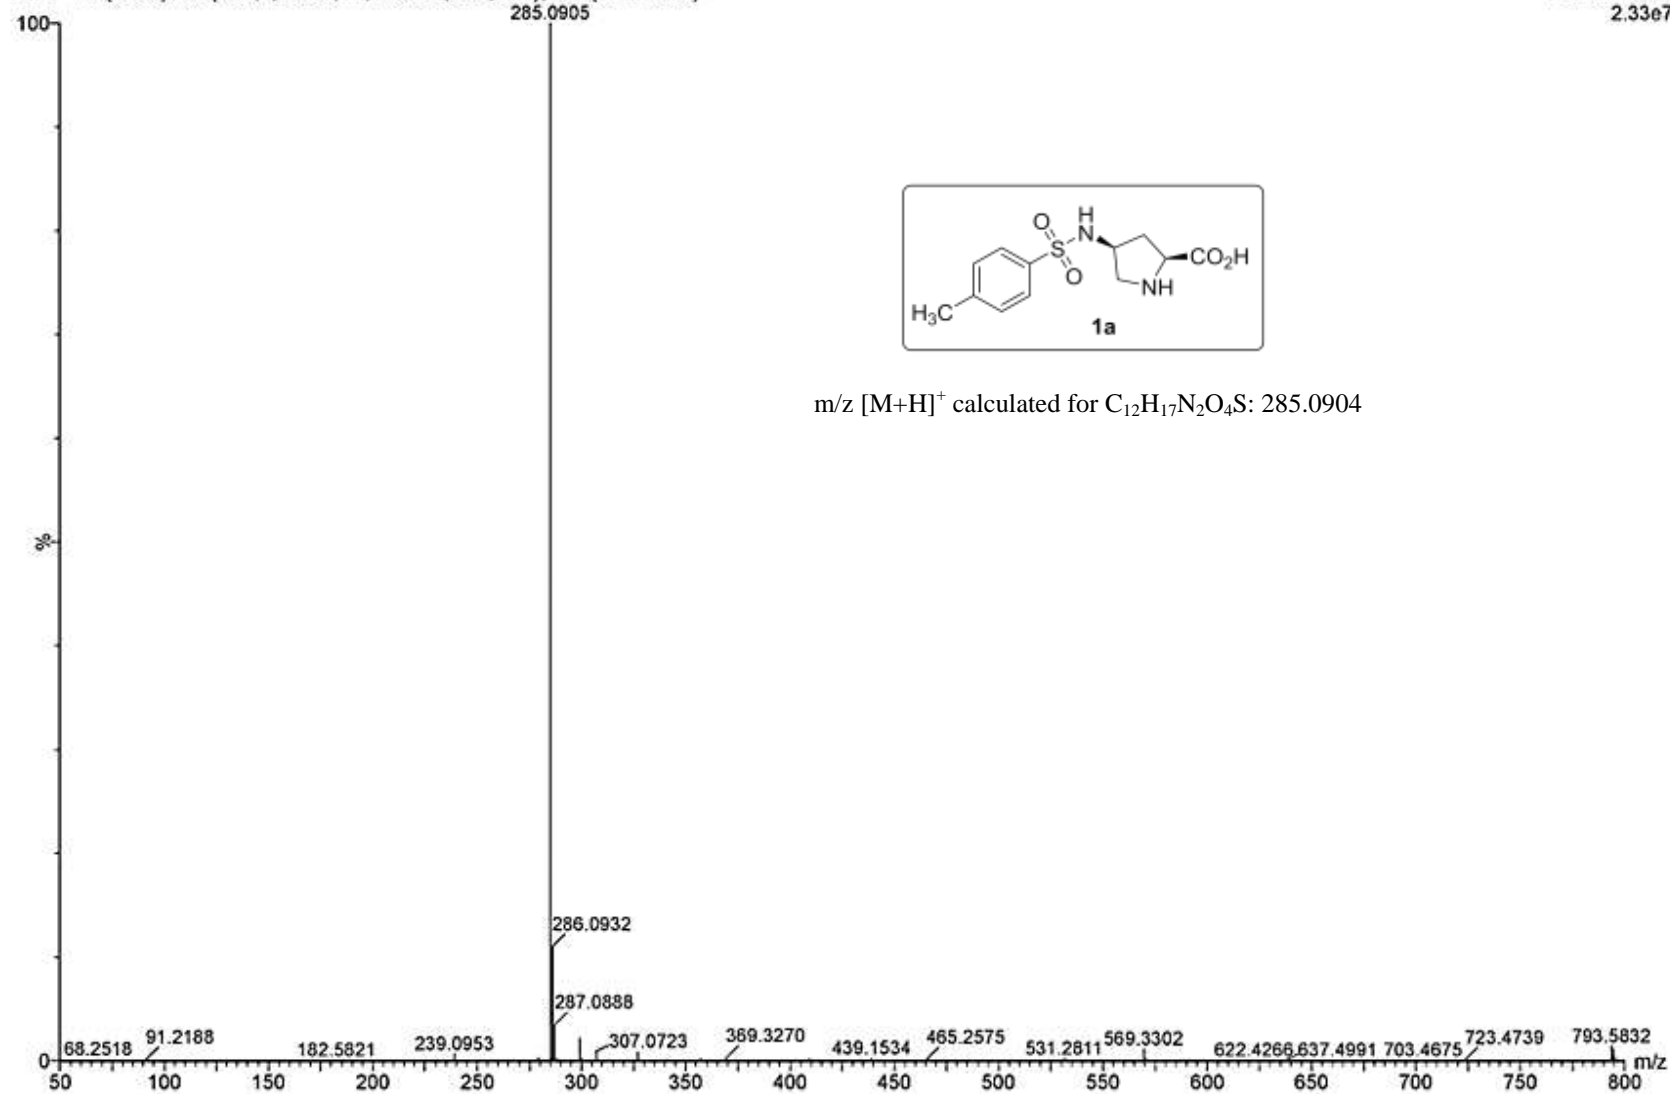

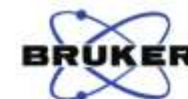

7.7072  
7.6911  
7.6749  
7.3730  
7.3500  
7.3012  
7.2689  
7.2452  
7.2325  
5.7562  
5.7367  
5.6799  
5.6604  
5.2508  
5.2264  
5.1904  
5.1659  
5.1518  
5.1271  
5.0967  
5.0717  
5.0302  
4.3726  
4.3552  
4.3301  
4.3114  
4.0487  
4.0367  
4.0309  
4.0241  
4.0179  
4.0055  
3.5782  
3.5673  
3.5556  
3.5441  
3.5342  
3.4704  
3.4470  
3.4321  
3.4087  
2.4212  
2.3857  
2.3483  
2.3211  
2.3079  
2.2920  
2.2807  
2.2615  
1.9660  
1.9384  
1.8388  
1.8110

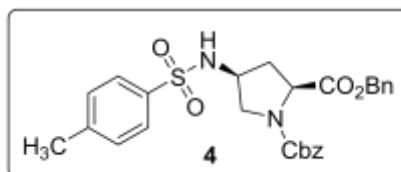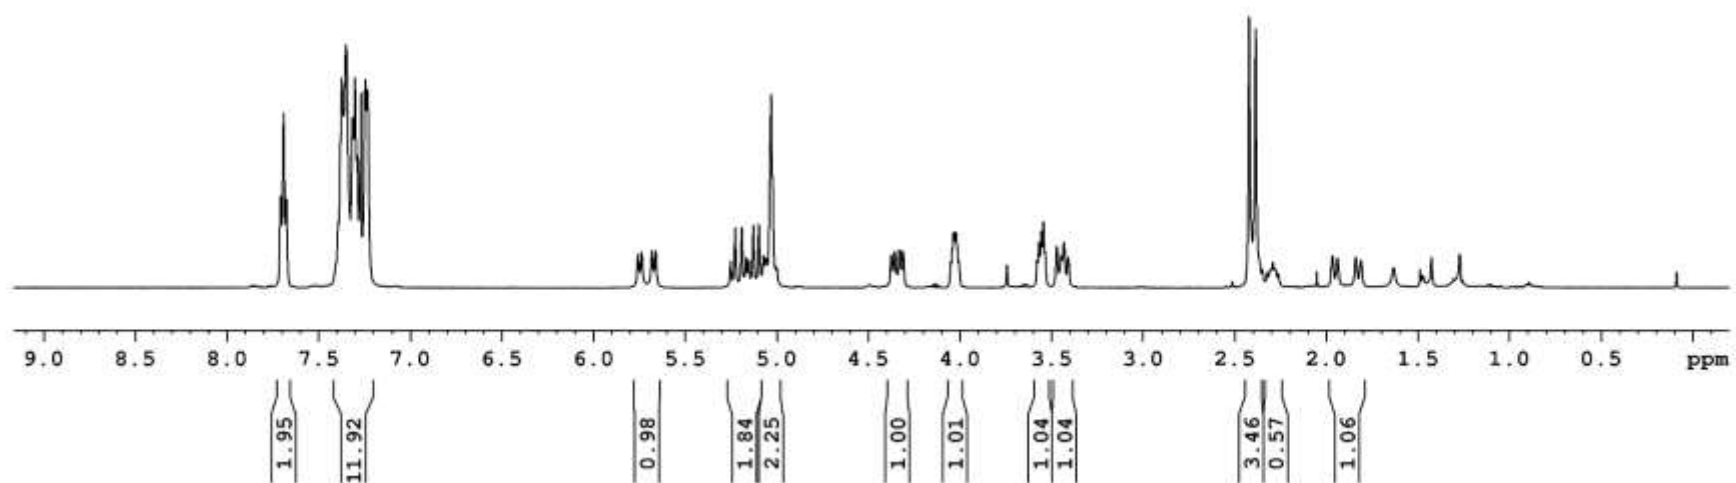

ES-KK-PRE-PTAP; 13C; CDC13; 23/05/2018

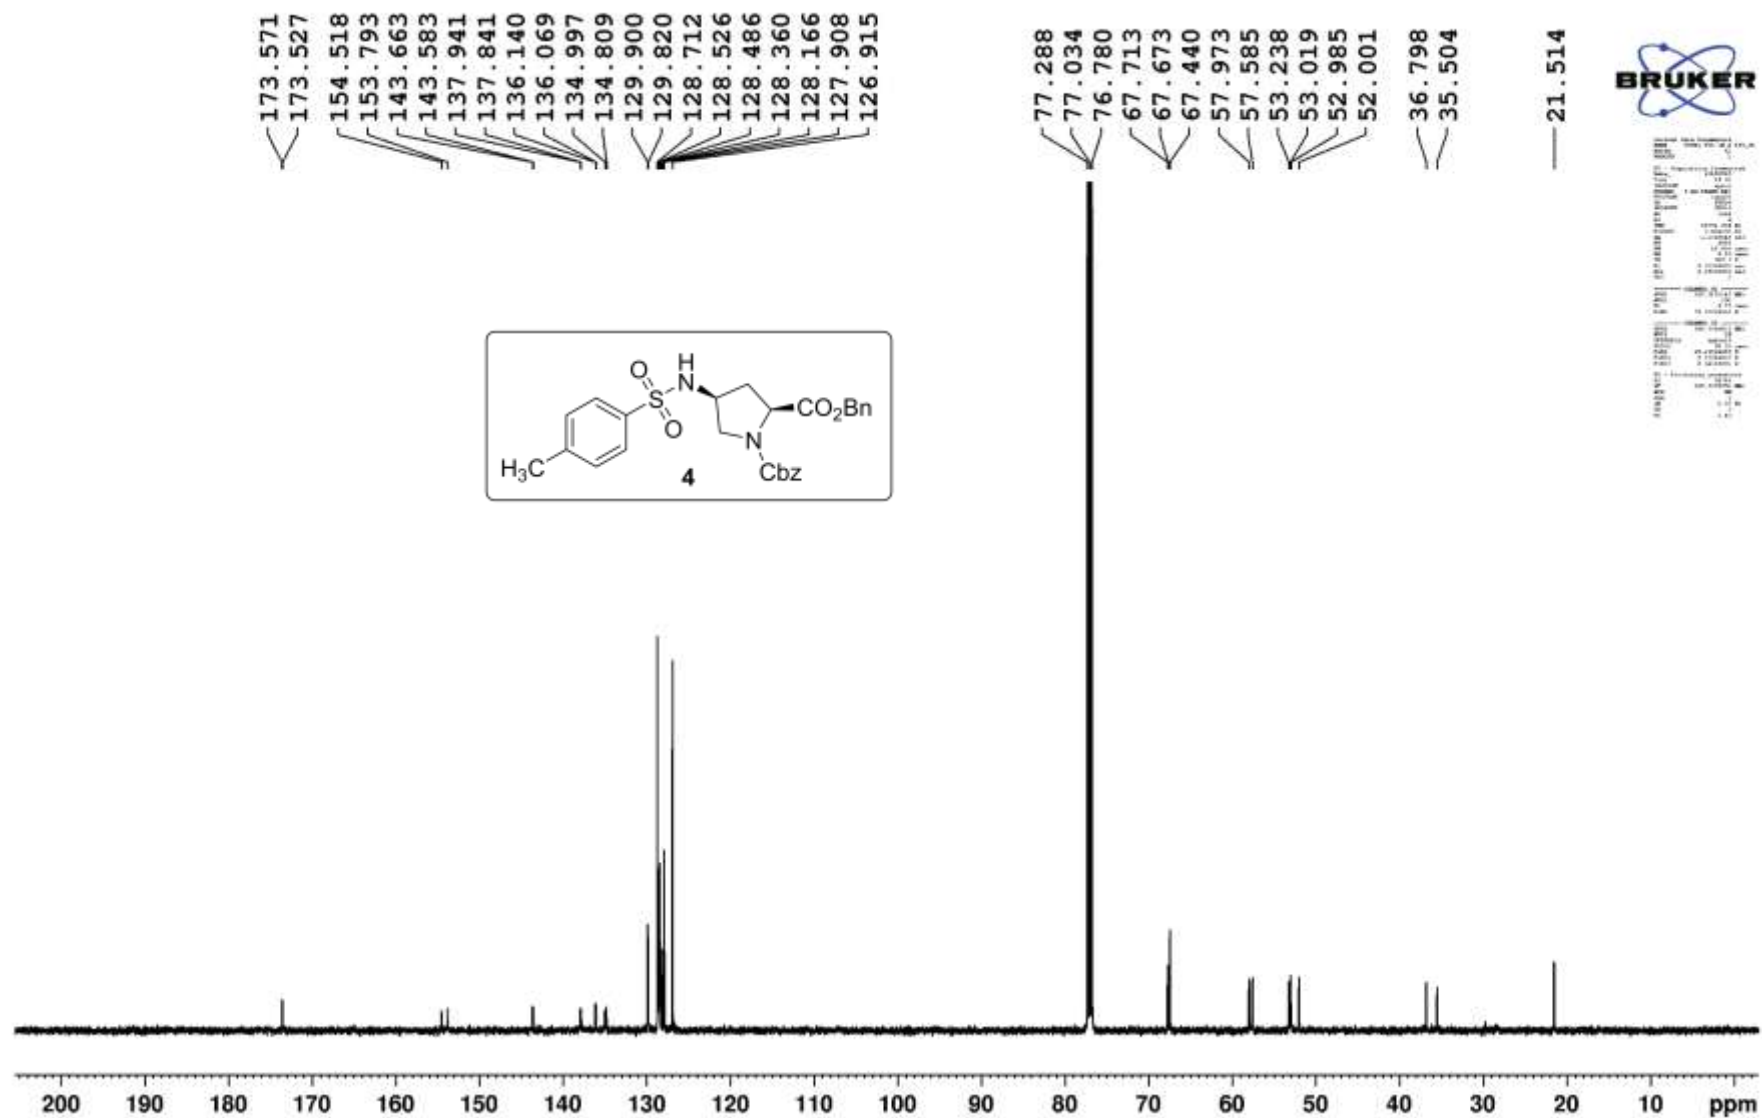

PTAP-3 9 (0.169) AM (Cen,4, 80.00, Ht,10000,0,0.00,0.00); Cm (3:16-42:51)

TOF MS ES+  
1.47e6

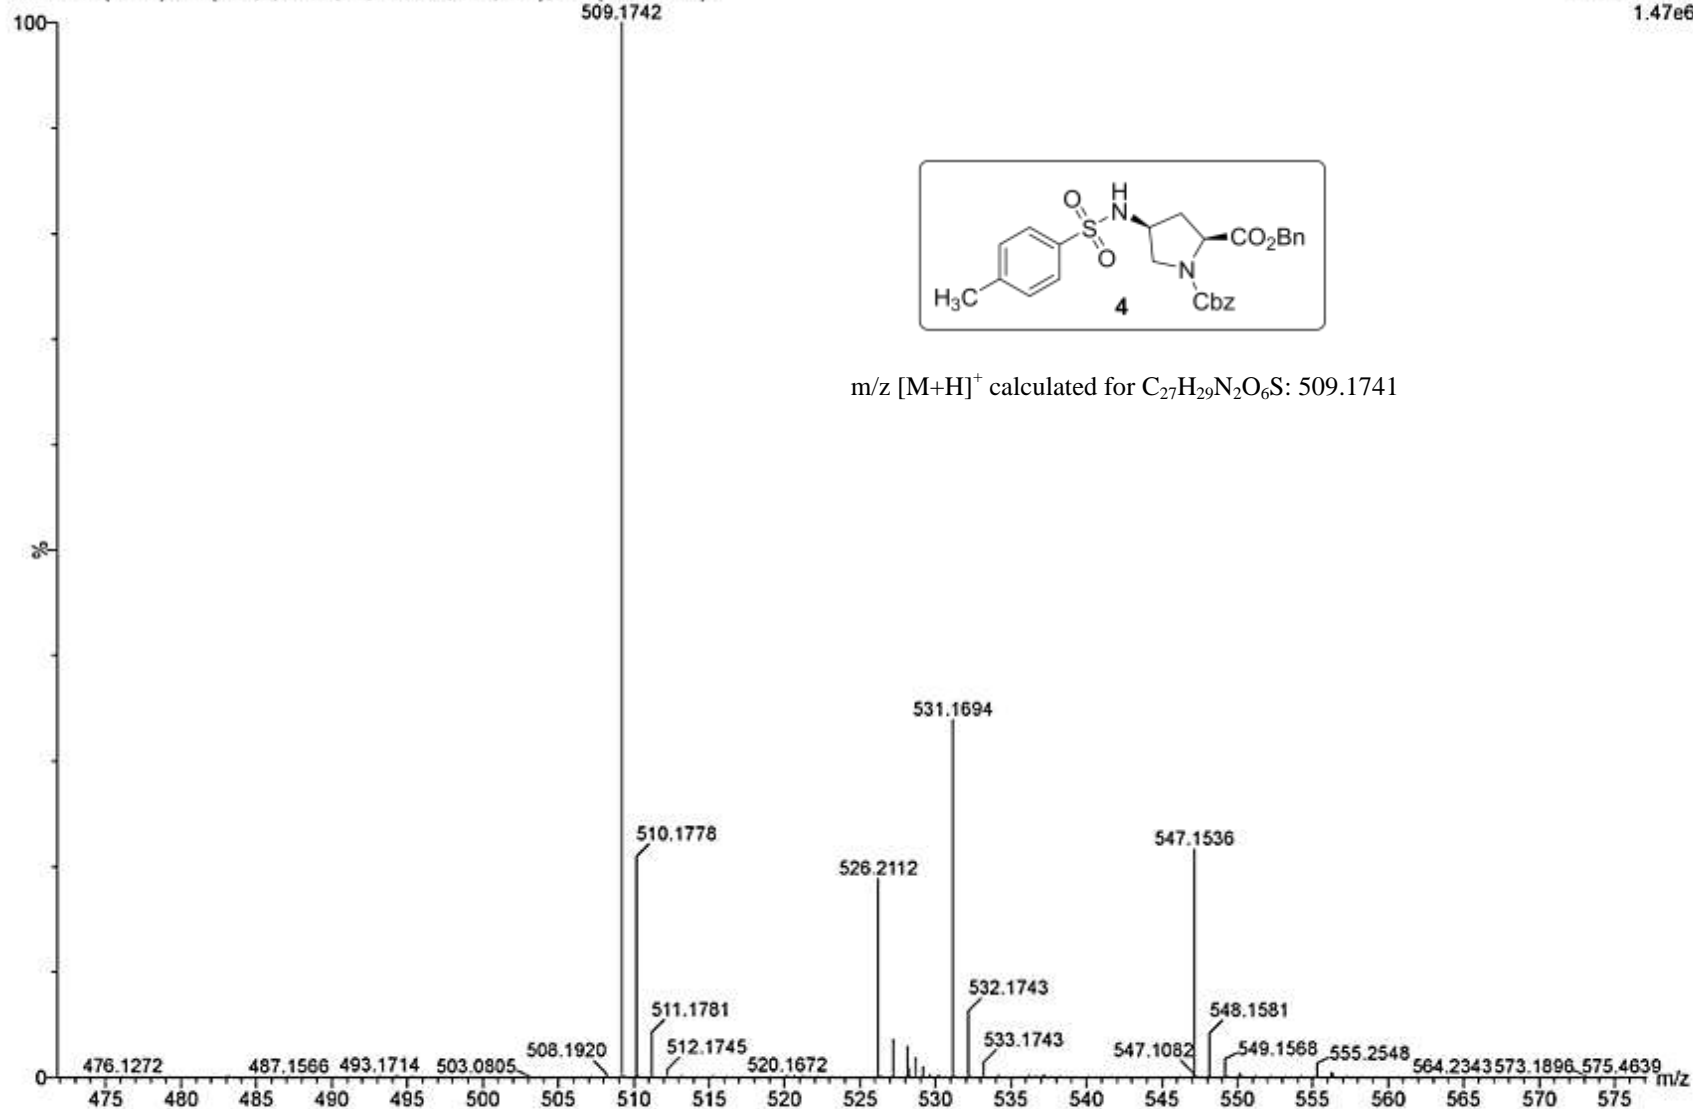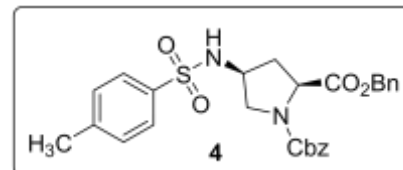

m/z [M+H]<sup>+</sup> calculated for C<sub>27</sub>H<sub>29</sub>N<sub>2</sub>O<sub>6</sub>S: 509.1741

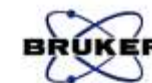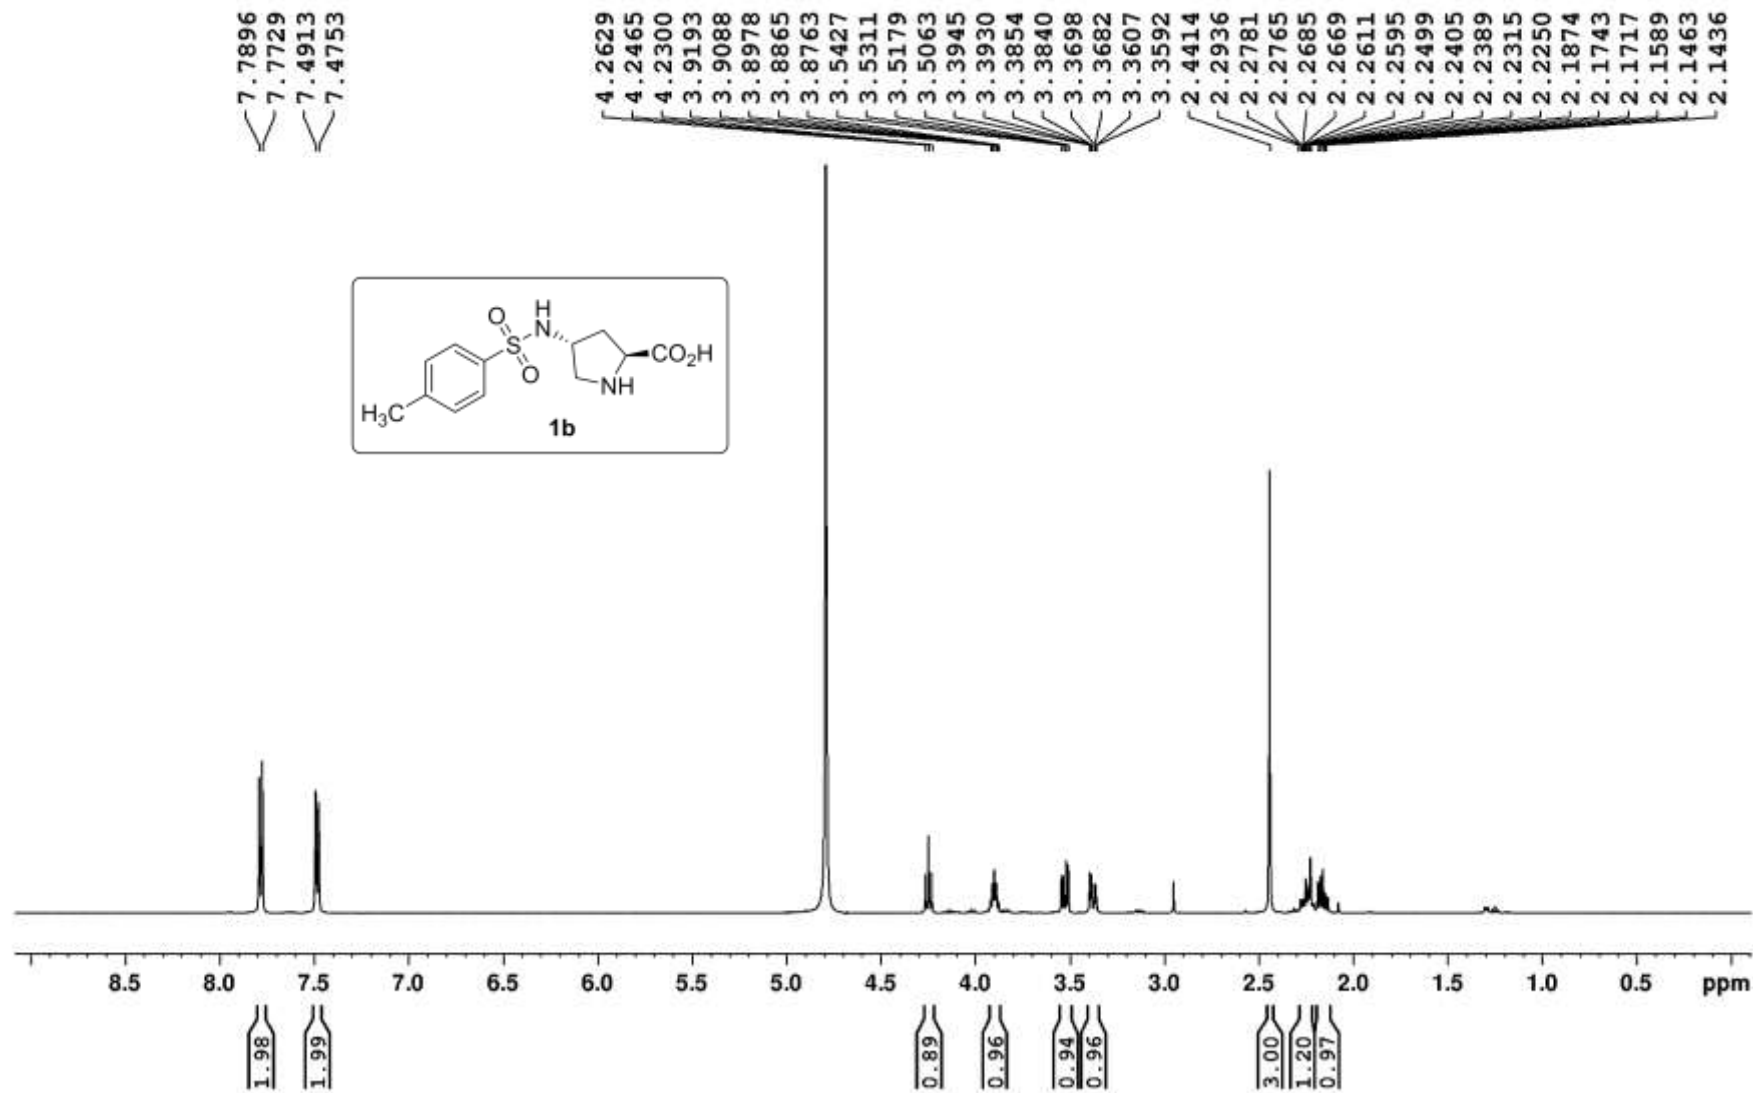



ES-KK-T-NHTS-CAT; 13C; D2O; 29/6/19

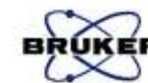

— 173.2935

— 145.5605

— 134.3709

— 130.2497

— 126.8925

— 59.7108

— 52.0086

— 50.5353

— 34.4308

— 20.6805

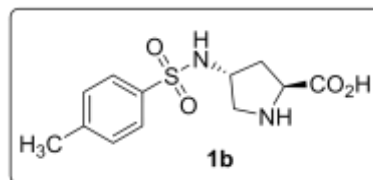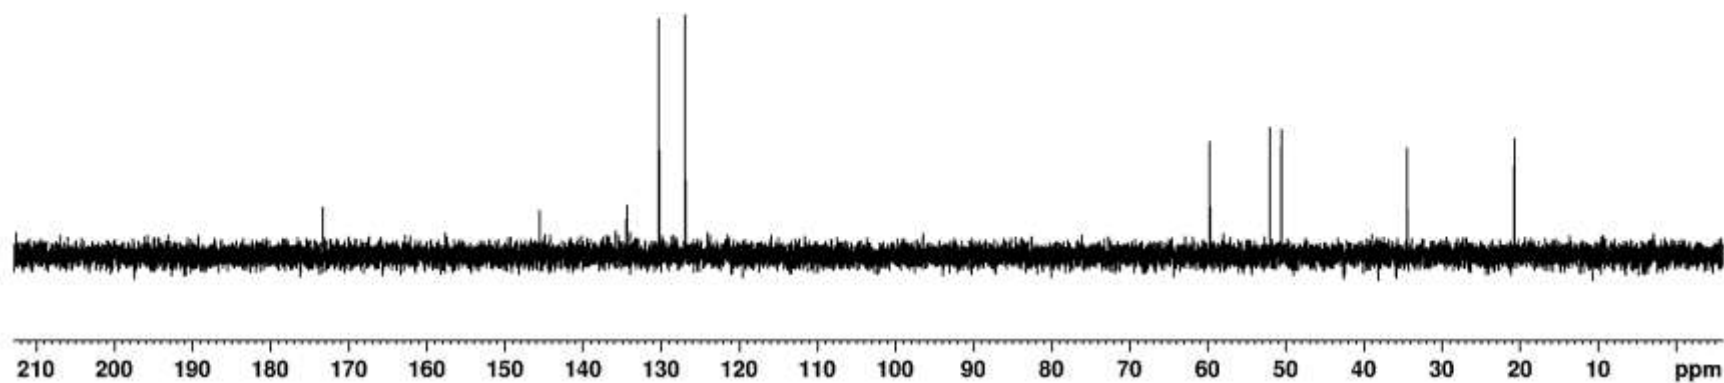

ES-KK-231 11 (0.203)AM (Cen,4, 80.00, Ht,10000.0,0.00,0.00); Cm (11:15)

TOF MS ES+  
4.38e7

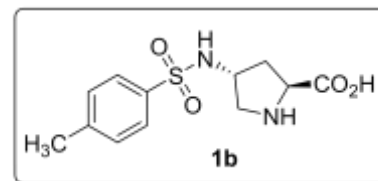

m/z [M+H]<sup>+</sup> calculated for C<sub>12</sub>H<sub>17</sub>N<sub>2</sub>O<sub>4</sub>S: 285.0904

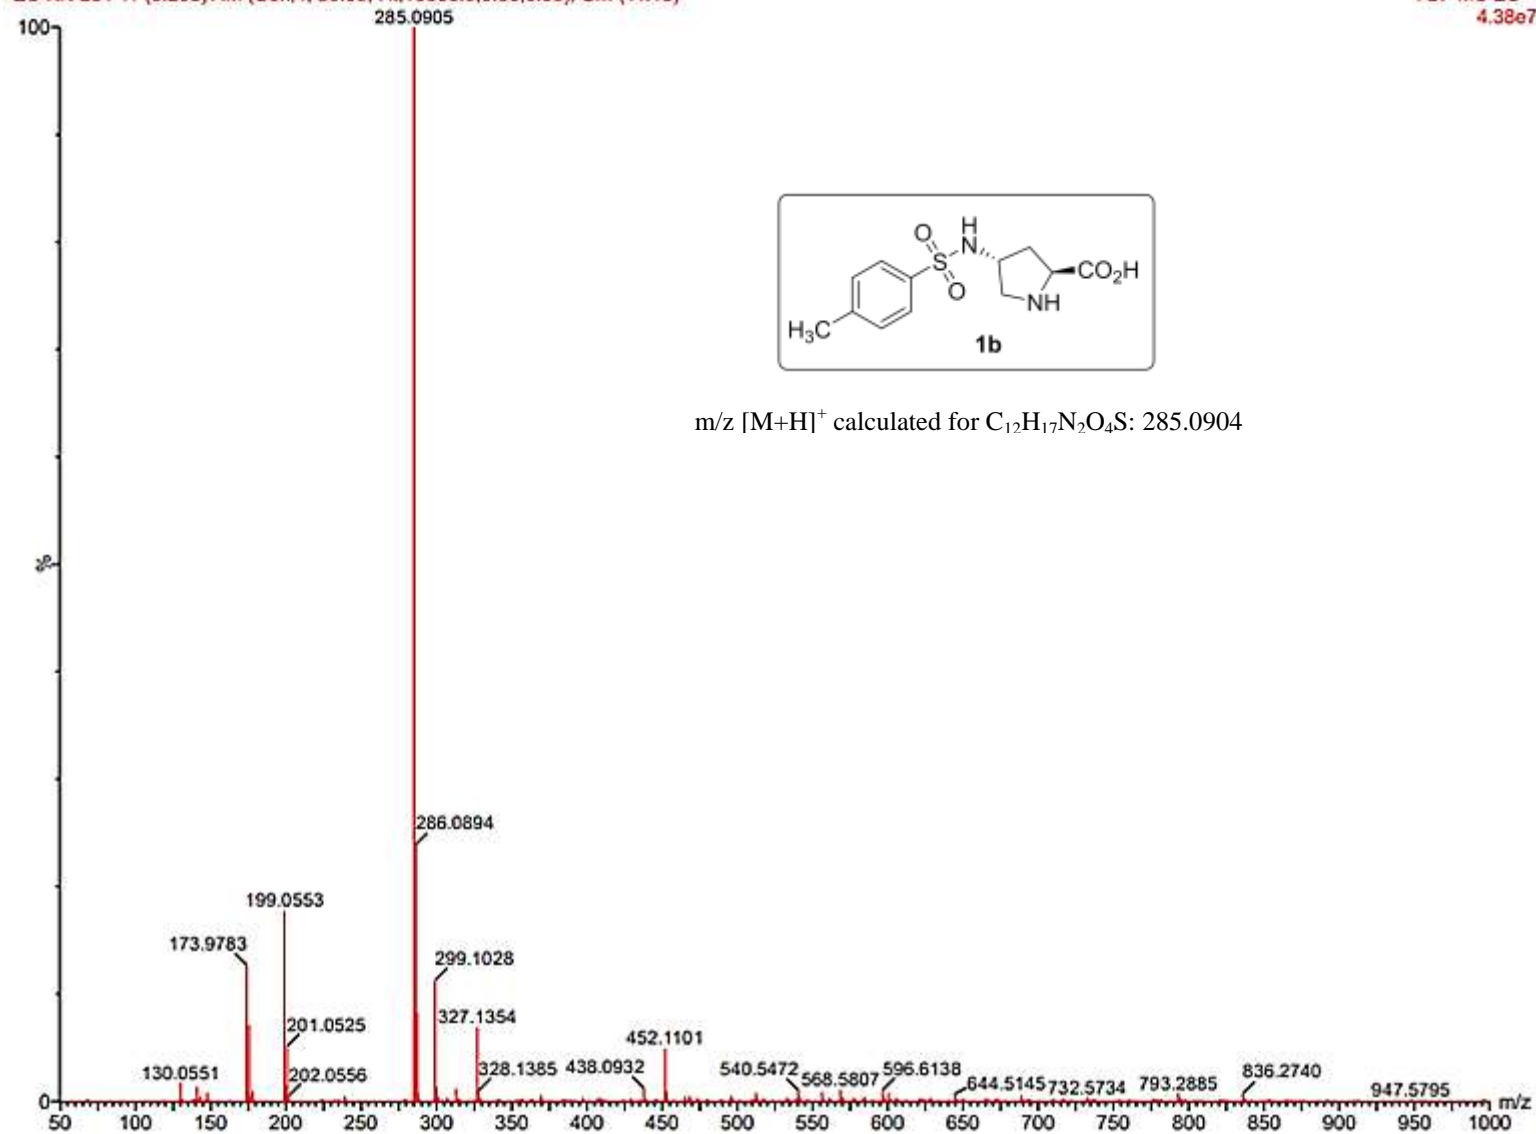

ES-KK-PRE-T-NHTS; 1H; CDC13; 30/6/19

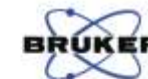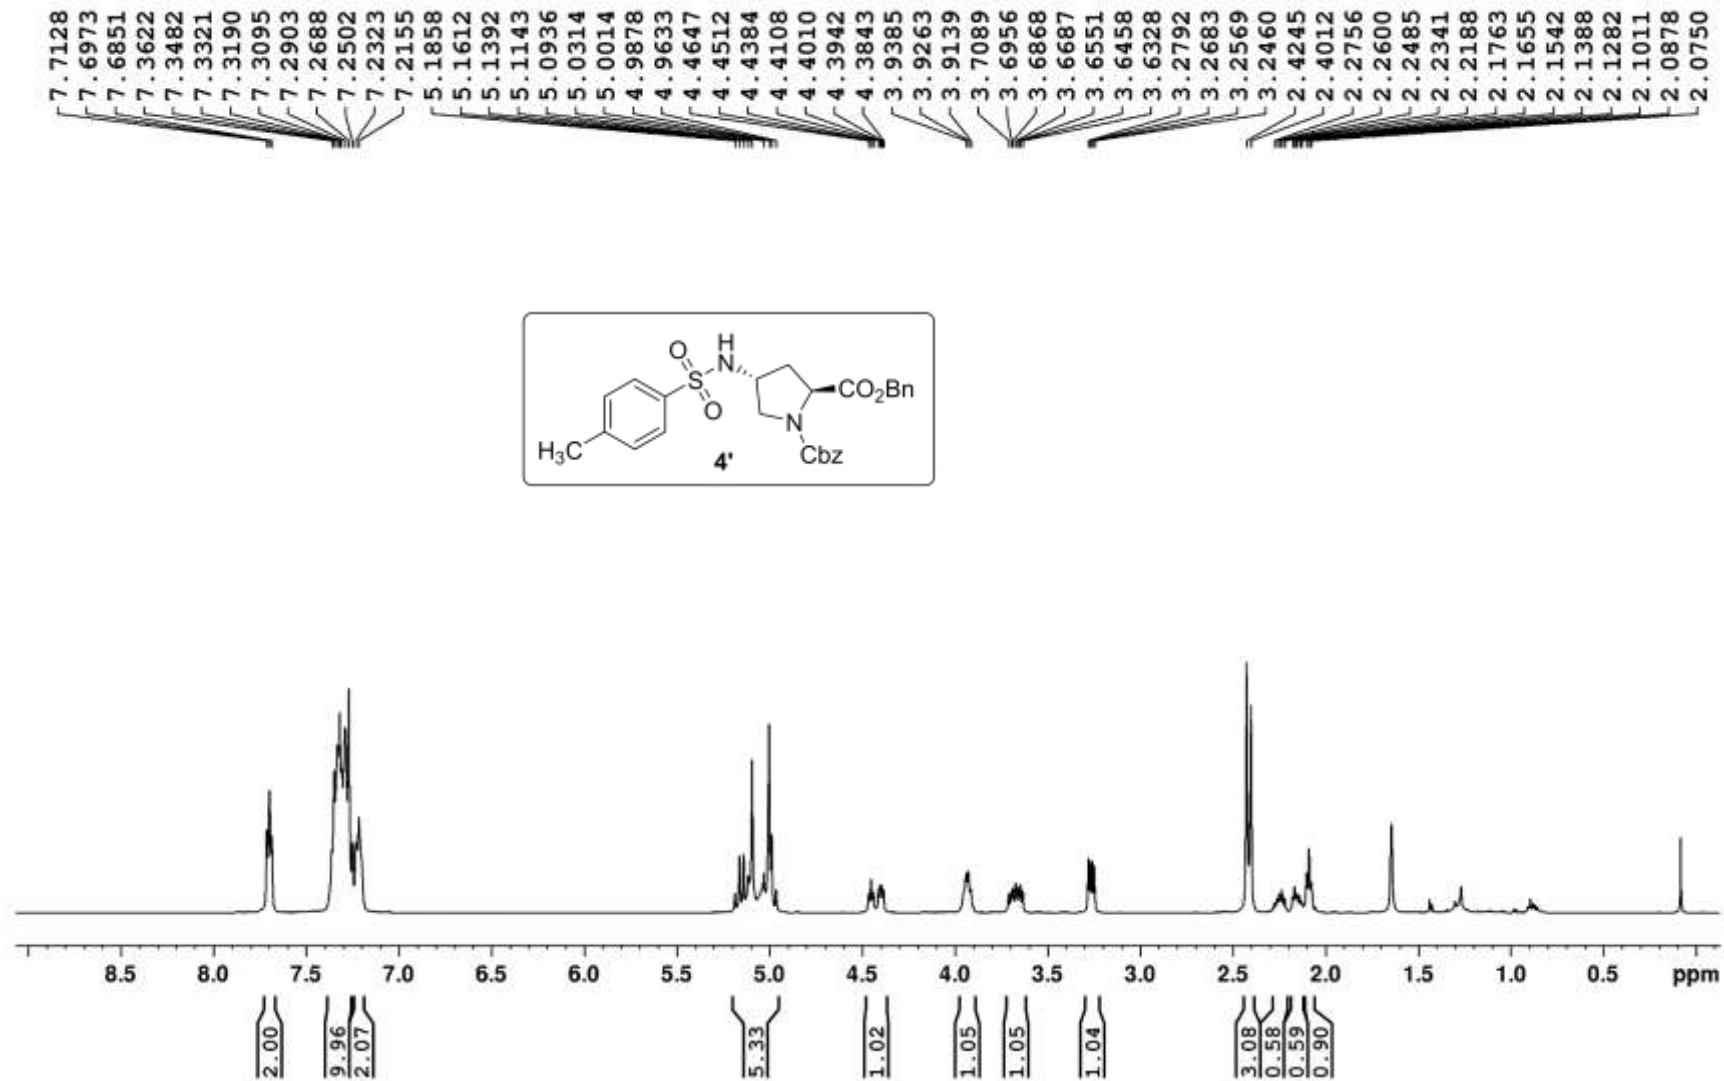

SI-123

ES-KK-PRE-T-NHTS; 13C; CDC13; 30/6/19

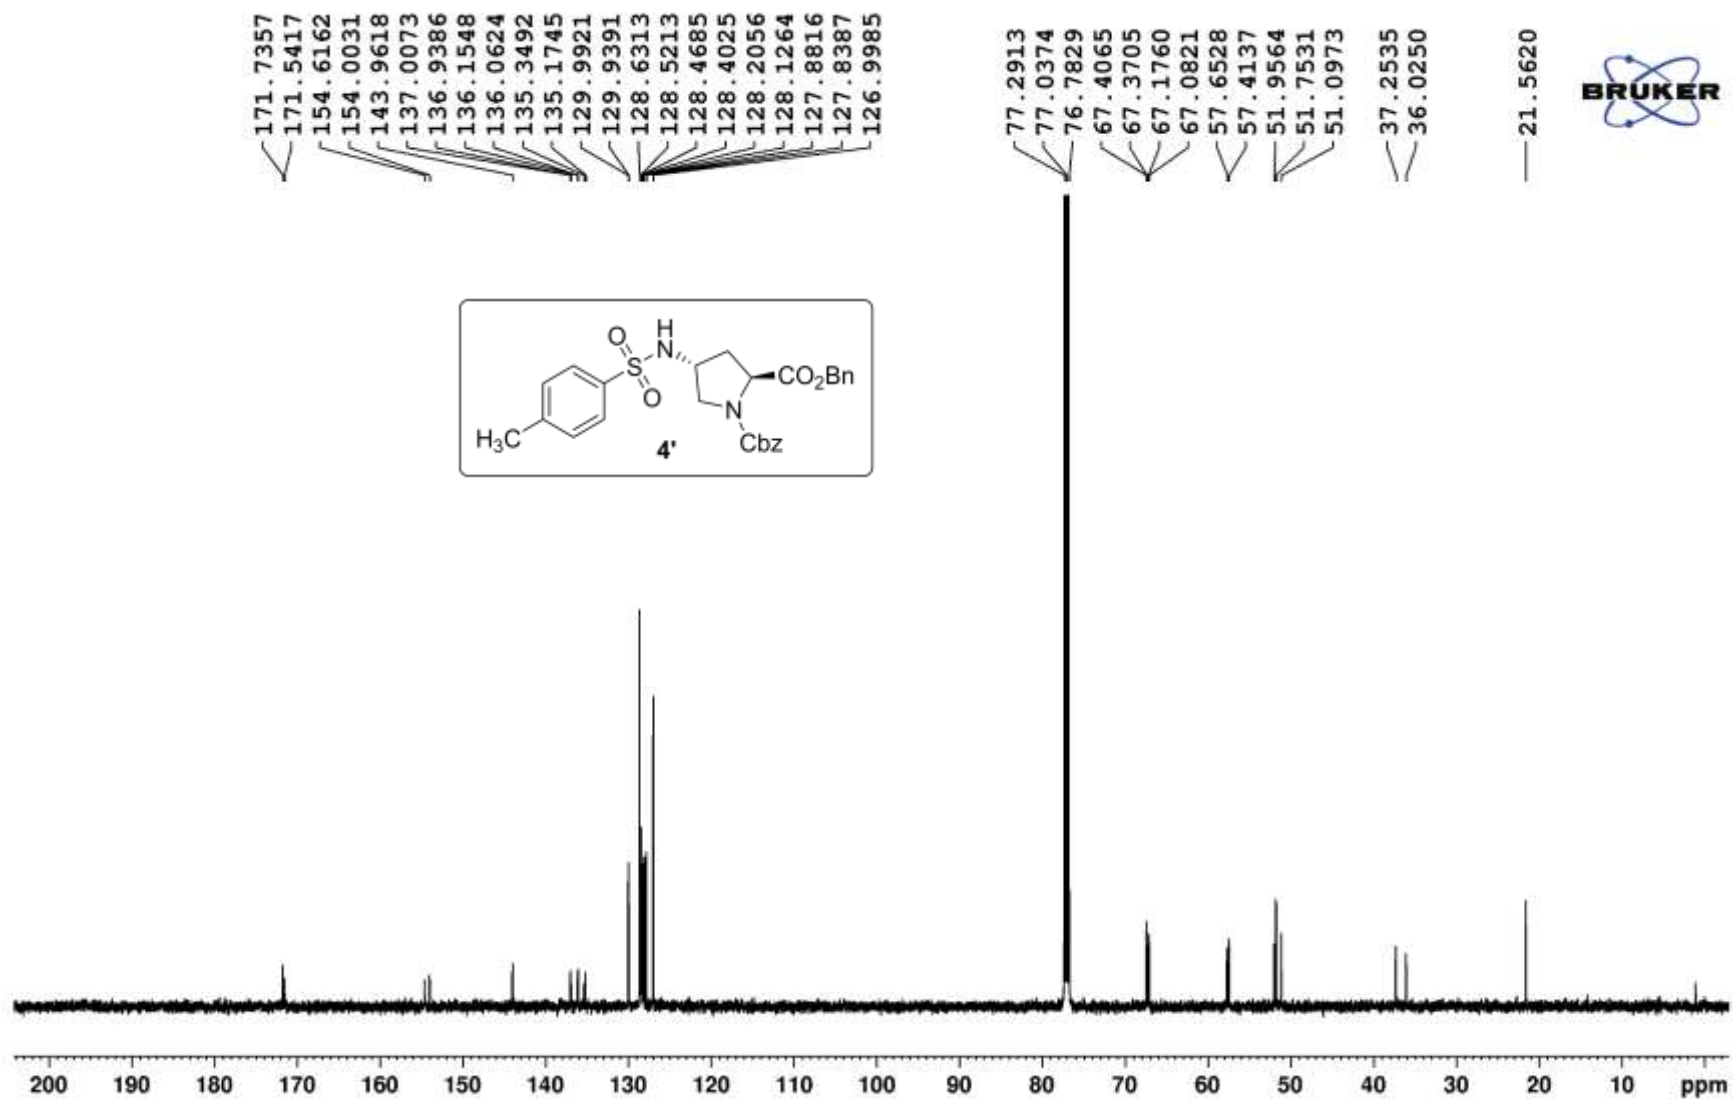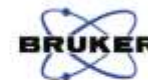

ES-KK-228 14 (0.254) AM (Cen,4, 80.00, Ht,10000.0,0.00,0.00): Cm (14:17)

TOF MS ES+  
5.35e6

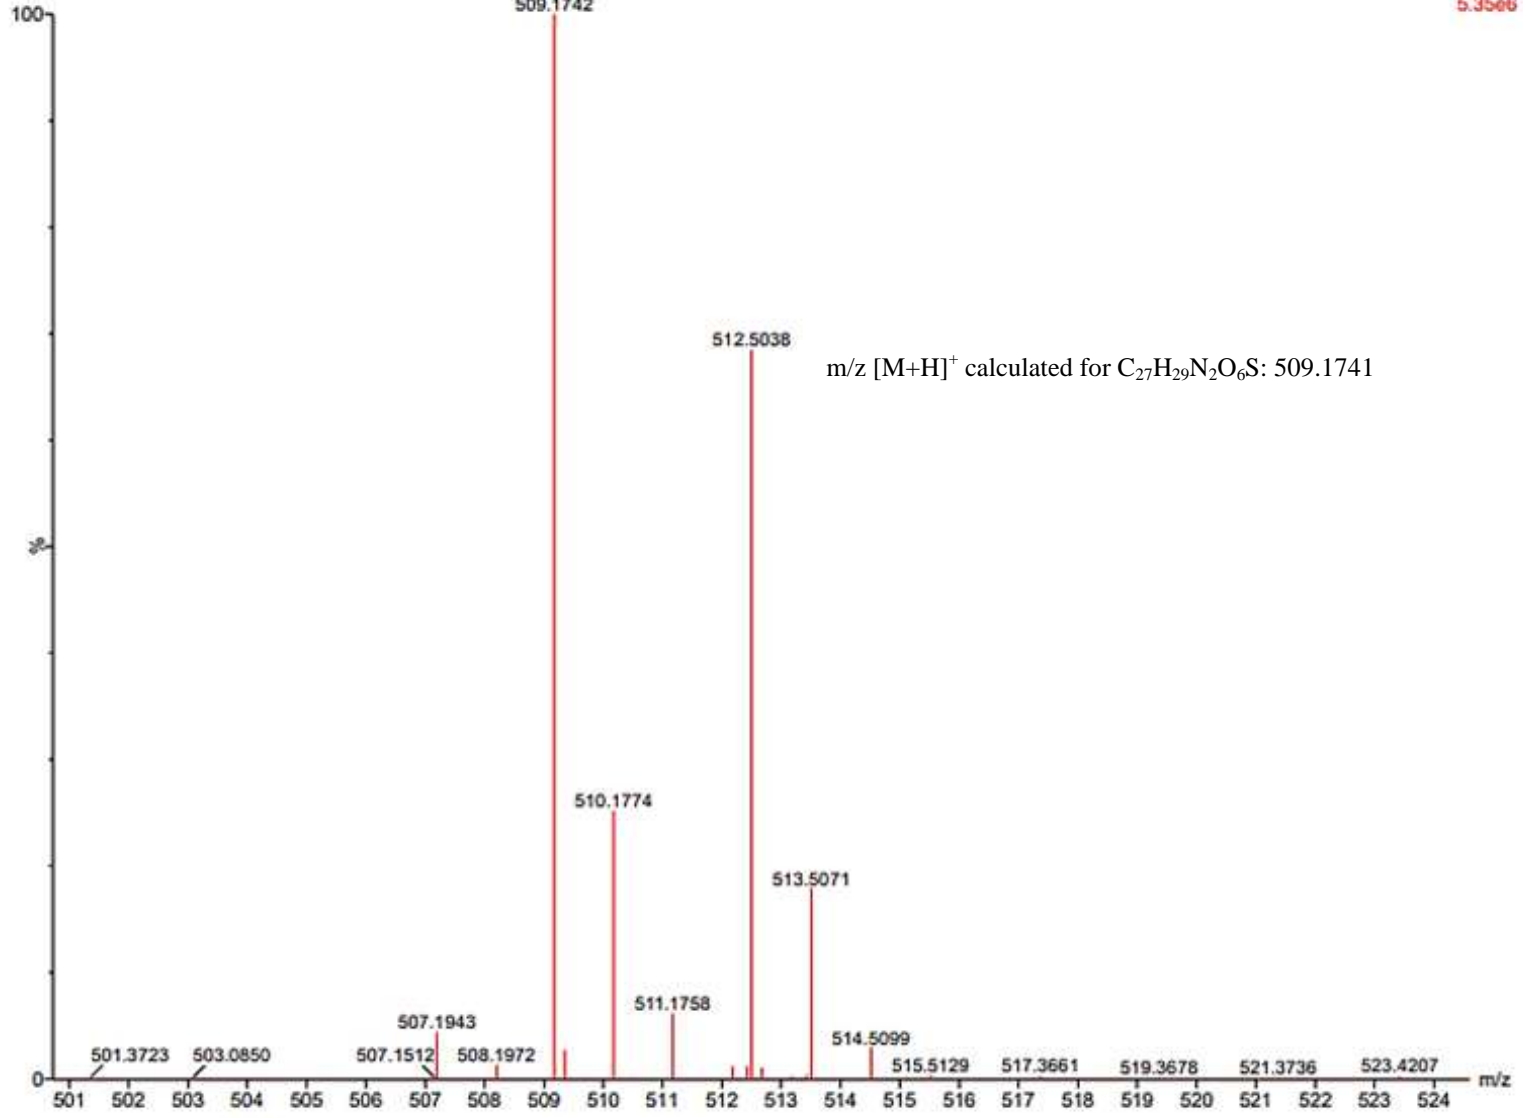

Supplement: d3nj02685j1.pdf [file d3nj02685j1.pdf]
